# Supplementary material for: Computer-Aided Design for Identifying Anticancer Targets in Genome-Scale Metabolic Models of Colon Cancer
Source: Biology (Basel). 2021 Oct 29;10(11):1115. doi: 10.3390/biology10111115 (PMC8614794; doi:10.3390/biology10111115)
Supplement: Supplementary file 1 [file biology-10-01115-s001.zip › SupplementaryFile2.xlsx]

## Sheet: Description
Database searching for adverse events
The adverse events (AEs) were accessed using DrugBank ID from the SIDER (http://sideeffects.embl.de/) and ADReCS (http://www.bio-add.org/ADReCS/index.jsp) databases.
The AE grades were calculated based on definitions of the Common Terminology Criteria for Adverse Events (CTCAE v5.0) dictionary.
The CTCAE displays Grades 1 through 5 with unique clinical descriptions of severity for each AE based on the following guideline:
Grade	Description
1	Mild; asymptomatic or mild symptoms; clinical or diagnostic observations only; intervention not indicated.
2	Moderate; minimal, local or noninvasive intervention indicated; limiting age-appropriate instrumental activities of daily living.
3	Severe or medically significant but not immediately life-threatening; hospitalization or prolongation of hospitalization indicated; disabling; limiting self care activities of daily living.
4	Life-threatening consequences; urgent intervention indicated.
5	Death related to AE.
	Each ADR term contains different scale of AEs, and the Adverse Drug Reaction (ADR) grade is summed up all presented AE grades.
Table S1	Average AE grades for drugs acting on DHODH
Table S2	Average AE grades for drugs acting on HMGCR

## Sheet: DHODH
Table S1: Average AE grades for drugs acting on DHODH
DrugBank ID	Drug Name	Average Grade			DrugBank ID	Adverse Event	Grade	DrugBank ID	Adverse Event	Grade	DrugBank ID	Adverse Event	Grade
DB01097	Leflunomide	9.45556			DB01097	Abdominal pain	6	DB01117	Abdominal pain	6	DB08880	Abdominal distension	6
DB01117	Atovaquone	10.5				Alopecia	3		Alanine aminotransferase increased	10		Abdominal pain upper	6
DB08880	Teriflunomide	10.1778				Anaemia	15		Amylase increased	10		Alanine aminotransferase increased	10
DB02262	Orotic acid					Angina pectoris	6		Anaemia	15		Alopecia	3
DB02613	Capric dimethyl amine oxide					Anorexia	15		Anorexia	15		Anaemia	15
DB03247	Flavin mononucleotide					Anxiety	10		Anxiety	10		Anxiety	10
DB03480	Brequinar Analog					Appetite absent	15		Aspartate aminotransferase increased	10		Anxiety depression	15
DB03523	Brequinar					Arthralgia	6		Blood and lymphatic system disorders	15		Aspartate aminotransferase increased	10
DB04147	Dodecyldimethylamine N-oxide					Arthritis	6		Bronchospasm	15		Blood and lymphatic system disorders	15
DB04281	2-[4-(4-Chlorophenyl)Cyclohexylidene]-3,4-Dihydroxy-1(2h)-Naphthalenone					Back pain	6		Constipation	15		Blood creatinine increased	10
DB04583	5-Carbamoyl-1,1':4',1''-terphenyl-3-carboxylic acid					Blood and lymphatic system disorders	15		Cough	6		Bronchitis	14
DB05125	SC12267					Bone pain	6		Cough increased	6		Conjunctivitis	10
DB06481	Manitimus					Bronchitis	14		Creatinine increased	10		Cystitis	14
DB07443	(2Z)-N-biphenyl-4-yl-2-cyano-3-hydroxybut-2-enamide					Chills	6		Diarrhoea	15		Depression	15
DB07559	(2Z)-2-cyano-N-(2,2'-dichlorobiphenyl-4-yl)-3-hydroxybut-2-enamide					Colitis	15		Dizziness	6		Diarrhoea	15
DB07561	(2Z)-2-cyano-N-(3'-ethoxybiphenyl-4-yl)-3-hydroxybut-2-enamide					Conjunctivitis	10		Dysgeusia	3		Dysgeusia	3
DB07646	UNDECYLAMINE-N,N-DIMETHYL-N-OXIDE					Constipation	15		Dyspepsia	6		Gamma-glutamyltransferase increased	10
DB07975	2-({[3,5-DIFLUORO-3'-(TRIFLUOROMETHOXY)BIPHENYL-4-YL]AMINO}CARBONYL)CYCLOPENT-1-ENE-1-CARBOXYLIC ACID					Contusion	3		Dyspnoea	15		Headache	6
DB07976	3-{[(3-FLUORO-3'-METHOXYBIPHENYL-4-YL)AMINO]CARBONYL}THIOPHENE-2-CARBOXYLIC ACID					Cough	6		Erythema multiforme	15		Hyperkalaemia	15
DB07977	3-({[3,5-DIFLUORO-3'-(TRIFLUOROMETHOXY)BIPHENYL-4-YL]AMINO}CARBONYL)THIOPHENE-2-CARBOXYLIC ACID					Cough increased	6		Headache	6		Hypersensitivity	15
DB07978	2-({[2,3,5,6-TETRAFLUORO-3'-(TRIFLUOROMETHOXY)BIPHENYL-4-YL]AMINO}CARBONYL)CYCLOPENTA-1,3-DIENE-1-CARBOXYLIC ACID					Cramp muscle	6		Hepatic failure	12		Hypertension	15
DB08006	N-anthracen-2-yl-5-methyl[1,2,4]triazolo[1,5-a]pyrimidin-7-amine					Cramps of lower extremities	6		Hyperglycaemia	15		Laryngitis	14
DB08008	5-methyl-N-[4-(trifluoromethyl)phenyl][1,2,4]triazolo[1,5-a]pyrimidin-7-amine					Creatine phosphokinase increased	10		Hyperkalaemia	15		Menorrhagia	15
DB08169	(2Z)-N-biphenyl-4-yl-2-cyano-3-cyclopropyl-3-hydroxyprop-2-enamide					Cystitis	14		Hypersensitivity	15		Musculoskeletal pain	6
DB08172	(2Z)-N-(3-chloro-2'-methoxybiphenyl-4-yl)-2-cyano-3-hydroxybut-2-enamide					Diarrhoea	15		Hypoglycaemia	15		Myalgia	6
DB08249	3,6,9,12,15-PENTAOXATRICOSAN-1-OL					Digestion impaired	6		Hyponatraemia	15		Myocardial infarction	14
						Dizziness	6		Hypotension	15		Nausea	6
						Dry mouth	6		Insomnia	6		Neuralgia	6
						Dry skin	6		Myalgia	6		Pain	6
						Dysgeusia	3		Nausea	6		Palpitations	3
						Dyspepsia	6		Pain	6		Pancreatitis	14
						Dyspnoea	15		Pancreatitis	14		Paraesthesia	6
						Dysuria	1		Phosphatase alkaline increased	10		Pharyngitis	14
						Eczema	6		Pruritus	6		Pollakiuria	3
						Epistaxis	15		Rhinitis	2		Pruritus	6
						Erythema multiforme	15		Sinusitis	14		Renal failure acute	12
						Fatigue	6		Stevens-Johnson syndrome	12		Rhinitis	2
						Flatulence	3		Sweating	6		Sinusitis	14
						Gastritis	15		Urticaria	6		Tooth infection	14
						Gingivitis	15		Vomiting	15		Toothache	6
						Haematoma	15		Average	10.5		Upper respiratory tract infection	14
						Haematuria	15					Urinary tract infection	14
						Hair discoloration	1					Vision blurred	10
						Headache	6					Vomiting	15
						Hepatic failure	12					Weight decreased	6
						Herpes zoster	15					Average	10.1778
						Hyperglycaemia	15
						Hypersensitivity	15
						Hypertension	15
						Hyperthyroidism	15
						Hypokalaemia	15
						Hypotension	15
						Insomnia	6
						Malaise	6
						Myalgia	6
						Nail disorder	1
						Nausea	6
						Neck pain	6
						Neuralgia	6
						Oedema peripheral	6
						Oesophagitis	15
						Osteonecrosis	15
						Pain	6
						Palpitations	3
						Pancreatitis	14
						Paraesthesia	6
						Pelvic pain	6
						Pharyngitis	14
						Pollakiuria	3
						Pruritus	6
						Pulmonary fibrosis	15
						Rash maculo-papular	6
						Rhinitis	2
						Sepsis	12
						Sinusitis	14
						Skin ulcer	15
						Stevens-Johnson syndrome	12
						Stomatitis	15
						Sweating increased	6
						Throat sore	6
						Tingling sensation	6
						Toxic epidermal necrolysis	12
						Upper respiratory tract infection	14
						Urinary tract infection	14
						Urticaria	6
						Vasculitis	15
						Vertigo	6
						Vision blurred	10
						Vomiting	15
						Weight decreased	6
						Average	9.45556

## Sheet: HMGCR
Table S2: Average AE grades for drugs acting on HMGCR
DrugBank ID	Drug Name	Average Grade		DrugBank ID	Adverse Event	Grade	DrugBank ID	Adverse Event	Grade	DrugBank ID	Adverse Event	Grade	DrugBank ID	Adverse Event	Grade	DrugBank ID	Adverse Event	Grade	DrugBank ID	Adverse Event	Grade	DrugBank ID	Adverse Event	Grade	DrugBank ID	Adverse Event	Grade
DB00175	Pravastatin	8.72941		DB00175	Upper respiratory tract infection	14	DB00227	Flatulence	3	DB00439	Pharyngitis	14	DB00641	Upper respiratory tract infection	14	DB01076	Arthralgia	6	DB01095	Influenza-like symptoms	6	DB01098	Headache	6	DB08860	Myalgia	6
DB00227	Lovastatin	8.50877			Musculoskeletal pain	6		Constipation	15		Headache	6		Headache	6		Diarrhoea	15		Blood creatine phosphokinase increased	10		Dizziness	6		Constipation	15
DB00439	Cerivastatin	9.28571			Nausea	6		Headache	6		Rhinitis	2		Abdominal pain	6		Pain in extremity	6		Rhinitis	2		Arthralgia	6		Diarrhoea	15
DB00641	Simvastatin	9.03922			Vomiting	15		Diarrhoea	15		Sinusitis	14		Bronchitis	14		Headache	6		Headache	6		Nausea	6		Back pain	6
DB01076	Atorvastatin	9.01923			Diarrhoea	15		Nausea	6		Arthralgia	6		Constipation	15		Urinary tract infection	14		Pharyngitis	14		Myalgia	6		Pain in extremity	6
DB01095	Fluvastatin	8.63291			Headache	6		Myalgia	6		Dyspepsia	6		Atrial fibrillation	15		Dyspepsia	6		Abdominal pain	6		Constipation	15		Abdominal pain	6
DB01098	Rosuvastatin	9			Pain localised	6		Abdominal pain	6		Back pain	6		Nausea	6		Musculoskeletal pain	6		Dyspepsia	6		Abdominal pain	6		Amnesia	6
DB08860	Pitavastatin	7.93103			Cramp muscle	6		Dyspepsia	6		Diarrhoea	15		Gastritis	15		Muscle spasms	6		Sinusitis	14		Pruritus	6		Confusional state	10
DB00157	NADH				Anxiety	10		Vision blurred	10		Abdominal pain	6		Eczema	6		Insomnia	6		Constipation	15		Urticaria	6		Dizziness	6
DB01992	Coenzyme A				Angina pectoris	6		Cramp muscle	6		Myalgia	6		Vertigo	6		Sinusitis	14		Cough	6		Amnesia	6		Dyspepsia	6
DB03169	(S)-Hmg-Coa				Creatine phosphokinase increased	10		Dizziness	6		Nausea	6		Insomnia	6		Abdominal pain	6		Urinary tract infection	14		Confusional state	10		Fatigue	6
DB03461	Nicotinamide adenine dinucleotide phosphate				Rhinitis	2		Alopecia	3		Constipation	15		Sinusitis	14		Pharyngolaryngeal pain	6		Nausea	6		Depression	15		Nausea	6
DB04377	Meglutol				Weight increased	6		Amnesia	6		Leg pain	6		Flatulence	3		Back pain	6		Flatulence	3		Gynaecomastia	6		Muscle spasms	6
DB04447	1,4-Dithiothreitol				Lung infection	14		Anorexia	15		Dizziness	6		Diarrhoea	15		Flatulence	3		Bronchitis	14		Hypersensitivity	15		Hepatic failure	12
DB05317	TAK-475				Dizziness	6		Anxiety	10		Flatulence	3		Dyspepsia	6		Pharyngitis	14		Myalgia	6		Renal failure acute	12		Malaise	6
DB06693	Mevastatin				Fatigue	6		Arthralgia	6		Bronchitis	14		Arthralgia	6		Constipation	15		Diarrhoea	15		Myositis	10		Memory impairment	6
DB09061	Cannabidiol				Vision blurred	10		Arthritis	6		Alopecia	3		Myalgia	6		Hypersensitivity	15		Fatigue	6		Pancreatitis	14		Erectile dysfunction	6
DB09270	Ubidecarenone				Weight decreased	6		Confusional state	10		Anaemia	15		Alopecia	3		Myalgia	6		Upper respiratory tract infection	14		Rhabdomyolysis	15		Cognitive impairment	6
DB14009	Medical Cannabis				Flatulence	3		Dysgeusia	3		Angina pectoris	6		Amnesia	6		Nausea	6		Back pain	6		Hepatic failure	12		Forgetfulness	6
DB14011	Nabiximols				Paraesthesia	6		Dyspnoea	15		Anorexia	15		Anaemia	15		Alanine aminotransferase increased	10		Arthritis	6		Muscular weakness	6		Memory loss	6
					Urinary tract infection	14		Toxic epidermal necrolysis	12		Anxiety	10		Arthritis	6		Amnesia	6		Eructation	3		Memory impairment	6		Insomnia	6
					Cough	6		Erythema multiforme	15		Arthritis	6		Confusional state	10		Confusional state	10		Dizziness	6		Cognitive impairment	6		Arthralgia	6
					Dyspepsia	6		Flushing	6		Colitis	15		Dizziness	6		Dizziness	6		Abdominal pain upper	6		Forgetfulness	6		Headache	6
					Heartburn	6		Gynaecomastia	6		Cough	6		Dyspnoea	15		Dysgeusia	3		Insomnia	6		Memory loss	6		Hypersensitivity	15
					Myalgia	6		Hypersensitivity	15		Duodenal ulcer	15		Erythema multiforme	15		Toxic epidermal necrolysis	12		Alopecia	3		Insomnia	6		Renal failure acute	12
					Cardiac pain	6		Pancreatitis	14		Dysgeusia	3		Flushing	6		Erythema multiforme	15		Amnesia	6		Bronchitis	14		Myositis	10
					Abdominal distension	6		Paraesthesia	6		Dyspnoea	15		Pancreatitis	14		Fatigue	6		Anorexia	15		Diarrhoea	15		Pruritus	6
					Pharyngitis	14		Pruritus	6		Toxic epidermal necrolysis	12		Paraesthesia	6		Gynaecomastia	6		Anxiety	10		Dyspepsia	6		Rhabdomyolysis	15
					Gamma-glutamyltransferase increased	10		Purpura	6		Epistaxis	15		Proteinuria	6		Renal failure acute	12		Arthralgia	6		Flatulence	3		Urticaria	6
					Depression	15		Rhabdomyolysis	15		Erythema multiforme	15		Pruritus	6		Pancreatitis	14		Confusional state	10		Haematuria	15		Average	7.93103
					Pruritus	6		Stevens-Johnson syndrome	12		Flushing	6		Purpura	6		Rhabdomyolysis	15		Dysgeusia	3		Pain	6
					Endophthalmitis	9		Tremor	6		Gynaecomastia	6		Rhabdomyolysis	15		Stevens-Johnson syndrome	12		Dyspnoea	15		Paraesthesia	6
					Sinusitis	14		Urticaria	6		Hypersensitivity	15		Stevens-Johnson syndrome	12		Weight increased	6		Eczema	6		Pharyngitis	14
					Hypertension	15		Vasculitis	15		Renal failure acute	12		Urticaria	6		Hepatic failure	12		Toxic epidermal necrolysis	12		Proteinuria	6
					Tinnitus	6		Vertigo	6		Cramp muscle	6		Vasculitis	15		Oedema peripheral	6		Erythema multiforme	15		Rhinitis	2
					Hearing impaired	10		Vomiting	15		Myositis	10		Vomiting	15		Muscular weakness	6		Flushing	6		Sinusitis	14
					Distention	6		Chills	6		Pancreatitis	14		Chills	6		Memory impairment	6		Gynaecomastia	6		Urinary tract infection	14
					Myocardial infarction	14		Hepatic failure	12		Paraesthesia	6		Hepatic failure	12		Cognitive impairment	6		Hypersensitivity	15		Creatine phosphokinase increased	10
					Abdominal pain	6		Malaise	6		Pruritus	6		Malaise	6		Forgetfulness	6		Cramp muscle	6		Microscopic hematuria	15
					Amnesia	6		Memory impairment	6		Purpura	6		Memory impairment	6		Memory loss	6		Myositis	10		Cough increased	6
					Anaemia	15		Erectile dysfunction	6		Rhabdomyolysis	15		Erectile dysfunction	6		Alopecia	3		Pancreatitis	14		Average	9
					Arthralgia	6		Cognitive impairment	6		Stevens-Johnson syndrome	12		Anxiety	10		Anaemia	15		Paraesthesia	6
					Arthritis	6		Photosensitivity	15		Tremor	6		Depression	15		Anorexia	15		Pruritus	6
					Confusional state	10		Forgetfulness	6		Urticaria	6		Dysgeusia	3		Arthritis	6		Purpura	6
					Constipation	15		Memory loss	6		Vasculitis	15		Fatigue	6		Bronchitis	14		Rhabdomyolysis	15
					Dysgeusia	3		Insomnia	6		Vertigo	6		Gynaecomastia	6		Transient ischaemic attack	3		Muscle spasms	6
					Dyspnoea	15		Back pain	6		Vomiting	15		Hypersensitivity	15		Neck pain	6		Stevens-Johnson syndrome	12
					Dysuria	1		Fatigue	6		Chills	6		Pain	6		Colitis	15		Tremor	6
					Toxic epidermal necrolysis	12		Leg pain	6		Malaise	6		Tremor	6		Cystitis	14		Urticaria	6
					Erythema multiforme	15		Pain	6		Erectile dysfunction	6		Muscular weakness	6		Libido decreased	3		Vasculitis	15
					Gynaecomastia	6		Shoulder pain	6		Vision blurred	10		Vision blurred	10		Dysphagia	15		Vertigo	6
					Hypersensitivity	15		Sinusitis	14		Photosensitivity	15		Average	9.03922		Duodenal ulcer	15		Vomiting	15
					Renal failure acute	12		Urinary tract infection	14		Memory loss	6					Dyspnoea	15		Chills	6
					Pancreatitis	14		Dry mouth	6		Insomnia	6					Dysuria	1		Hepatic failure	12
					Purpura	6		Creatine phosphokinase increased	10		Myasthenia	6					Eczema	6		Muscular weakness	6
					Rhabdomyolysis	15		Phosphatase alkaline increased	10		Somnolence	15					Epistaxis	15		Photosensitivity reaction	15
					Stevens-Johnson syndrome	12		Ache	6		Average	9.28571					Eructation	3		Malaise	6
					Vasculitis	15		Average	8.50877								Oesophagitis	15		Memory impairment	6
					Chills	6											Gastritis	15		Erectile dysfunction	6
					Hepatic failure	12											Haematuria	15		Cognitive impairment	6
					Alanine aminotransferase increased	10											Hyperglycaemia	15		Dysaesthesia	6
					Malaise	6											Hypoglycaemia	15		Forgetfulness	6
					Memory impairment	6											Cramps of lower extremities	6		Memory loss	6
					Cognitive impairment	6											Cramp muscle	6		Atrial fibrillation	15
					Photosensitivity	15											Myositis	10		Conjunctivitis	10
					Forgetfulness	6											Pain	6		Gastritis	15
					Memory loss	6											Palpitations	3		Heartburn	6
					Alopecia	3											Paraesthesia	6		Hypertension	15
					Anorexia	15											Petechiae	6		Renal failure acute	12
					Flushing	6											Phlebitis	2		Leg pain	6
					Pain	6											Pruritus	6		Pain	6
					Tremor	6											Rhinitis	2		Pain in extremity	6
					Urticaria	6											Skin ulcer	15		Sweating	6
					Vertigo	6											Gastric ulcer	15		Syncope	3
					Muscular weakness	6											Stomatitis	15		Oedema peripheral	6
					Phosphatase alkaline increased	10											Sweating	6		Photosensitivity	15
					Dry skin	6											Syncope	3		Face oedema	6
					Decreased appetite	15											Tinnitus	6		Hot flush	6
					Ache	6											Pollakiuria	3		Blood and lymphatic system disorders	15
					Erectile dysfunction	6											Urinary incontinence	6		Average	8.63291
					Anxiety depression	15											Urticaria	6
					Polymyalgia	6											Uterine haemorrhage	15
					Hot flush	6											Vomiting	15
					Sweating increased	6											Dry mouth	6
					Insomnia	6											Urinary retention	15
					Average	8.72941											Micturition urgency	3
																	Creatine phosphokinase increased	10
																	Generalised oedema	10
																	Aspartate aminotransferase increased	10
																	Dry skin	6
																	Photosensitivity reaction	15
																	Malaise	6
																	Erectile dysfunction	6
																	Rectal haemorrhage	15
																	Blood bilirubin increased	10
																	Dry eye	6
																	Vision blurred	10
																	Face oedema	6
																	Blood and lymphatic system disorders	15
																	Blood creatine phosphokinase increased	10
																	Myasthenia	6
																	Somnolence	15
																	Abnormal ejaculation	3
																	Vaginal haemorrhage	15
																	Average	9.01923

## Sheet: SQLE
DrugBank ID	Drug Name	Average Grade		DrugBank ID	Adverse Event	Grade	DrugBank ID	Adverse Event	Grade	DrugBank ID	Adverse Event	Grade
DB00735	Naftifine	6		DB00735	Stinging	6	DB00857	Abdominal cramps	6	DB01091	Dysgeusia	3
DB00857	Terbinafine	9.19403			Pruritus	6		Anorexia	15		Pruritus	6
DB01091	Butenafine	5			Rash	6		Eructation	3		Stinging	6
DB08846	Ellagic acid				Erythema	6		Gastritis	15		Average	5
					Skin tenderness	6		Appetite absent	15
					Agranulocytosis	6		Headache	6
					Blister	6		Cough	6
					Dizziness	6		Cramp muscle	6
					Headache	6		Upper respiratory tract infection	14
					Inflammation	6		Abdominal pain upper	6
					Leukopenia	6		Diarrhoea	15
					Pain	6		Dyspepsia	6
					Average	6		Dizziness	6
								Nausea	6
								Flatulence	3
								Pharyngolaryngeal pain	6
								Abdominal pain	6
								Nasal congestion	6
								Pruritus	6
								Toothache	6
								Rhinorrhoea	1
								Urticaria	6
								Vomiting	15
								Eczema	6
								Hypoglycaemia	15
								Pain	6
								Dry mouth	6
								Sickness	6
								Alopecia	3
								Anaemia	15
								Anxiety	10
								Arthralgia	6
								Dermatitis exfoliative	14
								Dysgeusia	3
								Toxic epidermal necrolysis	12
								Erythema multiforme	15
								Fatigue	6
								Hypersensitivity	15
								Pancreatitis	14
								Paraesthesia	6
								Rhabdomyolysis	15
								Stevens-Johnson syndrome	12
								Tinnitus	6
								Vasculitis	15
								Vertigo	6
								Weight decreased	6
								Hepatic failure	12
								Depressive symptom	15
								Photosensitivity reaction	15
								Malaise	6
								Myalgia	6
								Influenza like illness	6
								Blood and lymphatic system disorders	15
								Blood creatine phosphokinase increased	10
								Hearing impaired	10
								Lightheadedness	6
								Arthritis	6
								Confusional state	10
								Partial hearing loss	10
								Thrombotic thrombocytopenic purpura	12
								Serum sickness	15
								Skin hyperpigmentation	3
								Decreased appetite	15
								Photosensitivity allergic reaction	15
								Vision blurred	10
								Photosensitivity	15
								Stinging	6
								Average	9.19403

## Sheet: EBP
DrugBank ID	Drug Name	Average Grade		DrugBank ID	Adverse Event	Grade
DB00675	Tamoxifen	8.94048		DB00675	Hot flush	6
					Amenorrhoea	2
					Flushing	6
					Weight decreased	6
					Arthritis	6
					Pharyngitis	14
					Arthralgia	6
					Vomiting	15
					Vaginal discharge	3
					Hypertension	15
					Nausea	6
					Oedema peripheral	6
					Back pain	6
					Urinary tract infection	14
					Insomnia	6
					Leukorrhea	3
					Cough increased	6
					Weight increased	6
					Abdominal pain	6
					Diarrhoea	15
					Dyspnoea	15
					Dizziness	6
					Osteoporosis	6
					Anxiety	10
					Dyspepsia	6
					Breast pain	6
					Bone pain	6
					Sepsis	12
					Sinusitis	14
					Myalgia	6
					Vaginal haemorrhage	15
					Sweating	6
					Alopecia	3
					Bronchitis	14
					Paraesthesia	6
					Aspartate aminotransferase increased	10
					Vaginal inflammation	10
					Constipation	15
					Anaemia	15
					Cough	6
					Fatigue	6
					Pain	6
					Urinary incontinence	6
					Nail changes	1
					Fracture	15
					Anorexia	15
					Depression	15
					Dry mouth	6
					Creatinine increased	10
					Blood bilirubin increased	10
					Thromboembolic event	15
					Abdominal cramps	6
					Musculoskeletal pain	6
					Hypersensitivity	15
					Platelet count decreased	10
					Hypercalcaemia	15
					Erectile dysfunction	6
					Erythema multiforme	15
					Headache	6
					Pancreatitis	14
					Stevens-Johnson syndrome	12
					Menstruation irregular	3
					Angina pectoris	6
					Contusion	3
					Dysphagia	15
					Dysgeusia	3
					Hypertriglyceridaemia	15
					Cramps of lower extremities	6
					Cramp muscle	6
					Myocardial infarction	14
					Optic nerve disorder	10
					Pelvic pain	6
					Pruritus	6
					Urticaria	6
					Vasculitis	15
					Hepatic failure	12
					Alanine aminotransferase increased	10
					Lightheadedness	6
					Ankle edema	6
					Disease progression	5
					Febrile neutropenia	12
					Myelosuppression	15
					Nettle rash	6
					Appetite absent	15
					Average	8.94048

## Sheet: UMPS
DrugBank ID	Drug Name	Average Grade		DrugBank ID	Adverse Event	Grade
DB00544	Fluorouracil	9.81538		DB00544	Nausea	6
DB02890	6-hydroxyuridine-5'-phosphate				Vomiting	15
					Sinusitis	14
					Dyspnoea	15
					Headache	6
					Hypotension	15
					Skin hyperpigmentation	3
					Nail changes	1
					Photosensitivity	15
					Somnolence	15
					Alopecia	3
					Anaemia	15
					Angina pectoris	6
					Anorexia	15
					Ataxia	6
					Confusional state	10
					Conjunctivitis	10
					Sudden death	5
					Dysphagia	15
					Diarrhoea	15
					Dizziness	6
					Dysarthria	6
					Epistaxis	15
					Oesophagitis	15
					Cardiac arrest	10
					Cardiac failure	15
					Heartburn	6
					Hypersensitivity	15
					Irritability	6
					Lethargy	3
					Leukocytosis	12
					Myocardial infarction	14
					Nystagmus	5
					Optic nerve disorder	10
					Pain	6
					Pericarditis	15
					Pharyngitis	14
					Proctitis	15
					Pruritus	6
					Stomatitis	15
					Upper respiratory tract infection	14
					Urinary tract infection	14
					Urticaria	6
					Photophobia	6
					Muscular weakness	6
					Dry skin	6
					Lacrimation increased	10
					Chronic conjunctivitis	10
					Photosensitivity reaction	15
					Myalgia	6
					Disorientation	10
					Slurred speech	6
					Euphoric mood	6
					Sepsis	12
					Vision blurred	10
					Dysaesthesia	6
					Lacrimation	10
					Rash maculo-papular	6
					Stinging	6
					Febrile neutropenia	12
					Memory loss	6
					Myelosuppression	15
					Catheter related infection	14
					Insomnia	6
					Tingling sensation	6
					Average	9.81538
