# Supplementary material for: Computer-Aided Design for Identifying Anticancer Targets in Genome-Scale Metabolic Models of Colon Cancer
Source: Biology (Basel). 2021 Oct 29;10(11):1115. doi: 10.3390/biology10111115 (PMC8614794; doi:10.3390/biology10111115)
Supplement: Supplementary file 1 [file biology-10-01115-s001.zip › SupplementaryFile3.xlsx]

## Sheet: MetaboliteFlowChange
Table S3: The log2 fold changes of metabolite-flows for the template, identified anticancer target genes, and identified antimetabolites
Metabolite	CA/BL template	HMGCR	MVK	MVD	PMVK	SQLE	FDFT1	EBP	LSS	SPTLC1	KDSR	CRLS1	PGS1	ADSL	ADSS2	UMPS	DHODH	RPIA	HMGCR_GAPDH	MVK_GAPDH	MVD_GAPDH	PMVK_GAPDH	SQLE_GAPDH	FDFT1_GAPDH	EBP_GAPDH	LSS_GAPDH	SPTLC1_GAPDH	KDSR_GAPDH	CRLS1_GAPDH	PGS1_GAPDH	ADSL_GAPDH	ADSS2_GAPDH	UMPS_GAPDH	DHODH_GAPDH	HMGCR_PGK1	MVK_PGK1	MVD_PGK1	PMVK_PGK1	SQLE_PGK1	FDFT1_PGK1	EBP_PGK1	LSS_PGK1	SPTLC1_PGK1	KDSR_PGK1	CRLS1_PGK1	PGS1_PGK1	ADSL_PGK1	ADSS2_PGK1	UMPS_PGK1
10fthf[c][l][m]	-0.8509	-1.2279	-1.2257	-1.2257	-1.2257	-1.2257	-1.2257	-1.2257	-1.2257	-1.2257	-1.2257	-1.2257	-1.2257	-1.2257	-1.2257	-1.2256	-1.2257	-1.2257	1.0245	-6.1021	-6.1021	-6.1021	-6.1023	-4.8525	-6.1023	-1.3211	-6.1023	-6.1023	-0.062	-6.102	-6.1021	0.7194	-6.1022	-6.1023	-7.3508	-7.3224	-7.3224	-7.3224	-7.3317	-7.3181	-7.3307	-7.3317	-7.3309	-7.3309	-7.3292	-7.3304	-7.3303	-7.3314	-7.3221
11docrtsl[c][e][m]	-0.1492	0.3533	0.3169	0.3169	0.3169	0.3317	0.3313	0.3416	0.3317	0.3173	0.3173	0.4849	0.2906	0.4501	0.3169	0.9052	0.2944	0.3486	1.5384	0.548	0.548	0.548	0.5014	0.4809	0.5105	0.0688	0.503	0.503	0.4347	0.5788	0.5685	0.4872	0.535	0.5144	1.2078	1.1949	1.1949	1.1949	0.4119	1.4501	0.5147	0.4119	0.4935	0.4935	0.6625	0.5509	0.5541	0.4409	1.2174
11docrtstrn[c][e][m]	-0.1492	0.3533	0.3169	0.3169	0.3169	0.3317	0.3313	0.3416	0.3317	0.3173	0.3173	0.4849	0.2906	0.4501	0.3169	0.9052	0.2944	0.3486	1.5385	0.548	0.548	0.548	0.5014	0.4809	0.5105	0.0688	0.503	0.503	0.4347	0.5788	0.5685	0.4872	0.535	0.5144	1.2078	1.1949	1.1949	1.1949	0.4119	1.4501	0.5147	0.4119	0.4935	0.4935	0.6625	0.5509	0.5541	0.4409	1.2174
12dhchol[c][e]	-0.1488	0.353	0.3166	0.3166	0.3166	0.3314	0.3314	0.3417	0.3314	0.317	0.317	0.4847	0.2907	0.4502	0.317	0.9052	0.2945	0.3487	1.5385	0.5479	0.5479	0.5479	0.5012	0.4807	0.5103	0.0688	0.5028	0.5028	0.4348	0.5786	0.5687	0.4873	0.5348	0.5142	1.2077	1.1948	1.1948	1.1948	0.4117	1.4498	0.5145	0.4117	0.4933	0.4933	0.6624	0.5507	0.5536	0.4406	1.2171
12ppd_R[c][e]	-0.1492	0.3533	0.3169	0.3169	0.3169	0.3317	0.3313	0.342	0.3317	0.3173	0.3173	0.4849	0.2906	0.4501	0.3169	0.9052	0.2944	0.3489	1.5385	0.548	0.548	0.548	0.5014	0.4809	0.5105	0.0683	0.503	0.503	0.4347	0.5788	0.5685	0.4872	0.535	0.5144	1.208	1.1951	1.1951	1.1951	0.4119	1.4502	0.5147	0.4119	0.4935	0.4935	0.6625	0.5509	0.5541	0.4409	1.2174
12ppd_S[c]	0	0	0	0	0	0	0	0	0	0	0	0	0	0	0	0	0	0	0	0	0	0	0	0	0	0	0	0	0	0	0	0	0	0	0	0	0	0	0	0	0	0	0	0	0	0	0	0	0
13_cis_retn[c][e][r]	-0.1492	0.3533	0.3169	0.3169	0.3169	0.3315	0.3313	0.3416	0.3317	0.3173	0.3173	0.4849	0.2906	0.4501	0.3169	0.9052	0.2944	0.3486	1.5384	0.548	0.548	0.548	0.5014	0.4809	0.5104	0.0686	0.503	0.503	0.4347	0.5788	0.5685	0.4872	0.535	0.5144	1.2078	1.1949	1.1949	1.1949	0.4119	1.4501	0.5147	0.4119	0.4935	0.4935	0.6625	0.5509	0.5541	0.4409	1.2173
13dampp[c][e]	-0.1492	0.3529	0.3169	0.3169	0.3169	0.3313	0.3313	0.3416	0.3317	0.3169	0.3169	0.4846	0.2906	0.4501	0.3169	0.9052	0.2944	0.3486	1.5382	0.5477	0.5477	0.5477	0.501	0.4806	0.5102	0.0683	0.5027	0.5027	0.4347	0.5785	0.5682	0.4869	0.5347	0.5141	1.2078	1.1949	1.1949	1.1949	0.4119	1.4499	0.5144	0.4119	0.4935	0.4935	0.6622	0.5506	0.5537	0.4409	1.2172
13dpg[c]	0.6302	0.5075	0.5074	0.5074	0.5074	0.5074	0.5074	0.5074	0.5074	0.5074	0.5074	0.5074	0.5074	0.5074	0.5074	0.5074	0.5074	0.5074	1.0883	0.2323	0.2323	0.2323	0.2323	0.3299	0.2323	1.1142	0.2323	0.2323	0.7783	0.2323	0.2323	0.9979	0.2323	0.2323	-8.2711	-8.2674	-8.2674	-8.2674	-8.2674	-8.2674	-8.2674	-8.2674	-8.2674	-8.2674	-8.2674	-8.2674	-8.2674	-8.2674	-8.2674
1a25dhvitd2[c][e][m]	-0.1492	0.3533	0.3169	0.3169	0.3169	0.3317	0.3313	0.3416	0.3317	0.3173	0.3173	0.4849	0.2906	0.4501	0.3169	0.9052	0.2944	0.3486	1.5384	0.548	0.548	0.548	0.5014	0.4809	0.5105	0.0688	0.503	0.503	0.4347	0.5788	0.5685	0.4872	0.535	0.5144	1.2078	1.1949	1.1949	1.1949	0.4119	1.4501	0.5147	0.4119	0.4935	0.4935	0.6625	0.5509	0.5541	0.4409	1.2174
1a25dhvitd3[c][e][m][n]	-0.1492	0.3533	0.3169	0.3169	0.3169	0.3313	0.3313	0.3416	0.3317	0.3173	0.3173	0.4849	0.2906	0.4501	0.3169	0.9052	0.2944	0.3486	1.5384	0.548	0.548	0.548	0.5014	0.4809	0.5102	0.0683	0.503	0.503	0.4347	0.5788	0.5685	0.4872	0.535	0.5144	1.2078	1.1949	1.1949	1.1949	0.4119	1.4501	0.5147	0.4119	0.4935	0.4935	0.6625	0.5509	0.5541	0.4409	1.2174
1p3h5c[c][m]	-1.8875	-2.2789	-2.2779	-2.2779	-2.2779	-2.2779	-2.2779	-2.2778	-2.2779	-2.2779	-2.2779	-2.2778	-2.2779	-2.2778	-2.2779	-2.2778	-2.2779	-2.2778	-0.947	-1.0585	-1.0585	-1.0585	-1.0585	-1.1227	-1.0585	-1.4161	-1.0585	-1.0585	-1.0395	-1.0585	-1.0585	-0.962	-1.0585	-1.0585	-1.2401	-1.2402	-1.2402	-1.2402	-1.2402	-1.2402	-1.2402	-1.2402	-1.2402	-1.2402	-1.2402	-1.2402	-1.2402	-1.2402	-1.2402
1pyr5c[c][m]	0.8887	-0.6701	-0.6701	-0.6701	-0.6701	-0.6701	-0.6701	-0.6701	-0.6701	-0.6701	-0.6701	-0.6701	-0.6701	-0.6701	-0.6701	-0.6701	-0.6701	-0.6701	-0.6701	-0.6701	-0.6701	-0.6701	-0.6701	-0.6701	-0.6701	-2.5155	-0.6701	-0.6701	-0.6701	-0.6701	-0.6701	-0.6701	-0.6701	-0.6701	-0.6701	-0.6701	-0.6701	-0.6701	-0.6701	-0.6701	-0.6701	-0.6701	-0.6701	-0.6701	-0.6701	-0.6701	-0.6701	-0.6701	-0.6701
20ahchsterol[m][r]	-0.1492	0.3533	0.3169	0.3169	0.3169	0.3317	0.3313	0.3416	0.3317	0.3173	0.3173	0.4849	0.2906	0.4501	0.3169	0.9052	0.2944	0.3486	1.5384	0.548	0.548	0.548	0.5014	0.4809	0.5105	0.0688	0.503	0.503	0.4347	0.5788	0.5685	0.4872	0.535	0.5144	1.2078	1.1949	1.1949	1.1949	0.4119	1.4501	0.5147	0.4119	0.4935	0.4935	0.6625	0.5509	0.5541	0.4409	1.2174
23cump[e]	-0.1492	0.3533	0.3169	0.3169	0.3169	0.3317	0.3313	0.3416	0.3317	0.3173	0.3173	0.4849	0.2906	0.4501	0.3169	0.9052	0.2944	0.3486	1.5384	0.548	0.548	0.548	0.5014	0.4809	0.5105	0.0688	0.503	0.503	0.4347	0.5788	0.5685	0.4872	0.535	0.5144	1.2078	1.1949	1.1949	1.1949	0.4119	1.4501	0.5147	0.4119	0.4935	0.4935	0.6625	0.5509	0.5541	0.4409	1.2174
23dh1i56dio[c]	1.0138	0.5212	0.519	0.519	0.519	0.519	0.519	0.519	0.519	0.519	0.519	0.519	0.519	0.519	0.519	0.519	0.519	0.519	0.5278	0.424	0.424	0.424	0.424	0.4322	0.424	1.171	0.424	0.424	0.5541	0.424	0.424	0.5012	0.424	0.424	0.1989	0.1983	0.1983	0.1983	0.1983	0.1983	0.1983	0.1983	0.1983	0.1983	0.1983	0.1983	0.1983	0.1983	0.1983
23dpg[c]	-0.1492	0.3533	0.3169	0.3169	0.3169	0.3317	0.3313	0.3416	0.3317	0.3173	0.3173	0.4849	0.2906	0.4501	0.3169	0.9052	0.2944	0.3486	1.5384	0.548	0.548	0.548	0.5014	0.4809	0.5105	0.067	0.503	0.503	0.4347	0.5788	0.5685	0.4872	0.535	0.5144	8.2044	8.2081	8.2081	8.2081	8.2081	8.2081	8.2081	8.2081	8.2081	8.2081	8.2081	8.2081	8.2081	8.2081	8.2081
2aobut[m]	-14.8641	-14.3869	-14.4237	-14.4237	-14.4237	-14.4089	-14.4089	-14.3978	-14.4089	-14.4237	-14.4237	-14.2607	-14.4494	-14.2928	-14.4241	-13.8393	-14.4459	-14.3909	-0.8163	-14.2461	-14.2461	-14.2461	-14.2931	-14.3343	-14.2812	-14.6664	-14.2911	-14.2911	-2.7507	-14.2077	-14.2206	-0.775	-14.2607	-14.2805	-13.67	-13.6865	-13.6865	-13.6865	-14.4712	-13.4324	-14.3709	-14.4712	-14.3898	-14.3898	-14.2557	-14.3175	-14.3075	-14.4422	-13.6649
2c23dh56dhoxin[c]	-0.1492	0.3533	0.3169	0.3169	0.3169	0.3317	0.3313	0.3416	0.3317	0.3173	0.3173	0.4849	0.2906	0.4501	0.3169	0.9052	0.2944	0.3486	1.5384	0.548	0.548	0.548	0.5014	0.4809	0.5102	0.0683	0.503	0.503	0.4347	0.5788	0.5685	0.4872	0.535	0.5144	1.2078	1.1949	1.1949	1.1949	0.4119	1.4501	0.5147	0.4119	0.4935	0.4935	0.6625	0.5509	0.5541	0.4409	1.2174
2ddecdicoa[m][x]	29.3112	0	0	0	0	0	0	0	0	0	0	0	0	0	0	0	0	0	0	0	0	0	0	0	0	0	0	0	0	0	0	0	0	0	0	0	0	0	0	0	0	0	0	0	0	0	0	0	0
2dr1p[c]	-0.0834	-0.0881	-0.0881	-0.0881	-0.0881	-0.0881	-0.0881	-0.0881	-0.0881	-0.0881	-0.0881	-0.0881	-0.0881	-0.0881	-0.0881	-0.088	-0.0881	-0.0881	3.5392	2.0509	2.0509	2.0509	2.0509	2.2507	2.0509	-0.0881	2.0509	2.0509	3.0751	2.0509	2.0509	3.4035	2.0509	2.0509	1.2097	1.2096	1.2096	1.2096	1.2096	1.2096	1.2096	1.2096	1.2096	1.2096	1.2096	1.2096	1.2096	1.2096	1.2096
2dr5p[c]	-0.0915	-0.0882	-0.0882	-0.0882	-0.0882	-0.0882	-0.0882	-0.0882	-0.0882	-0.0882	-0.0882	-0.0882	-0.0882	-0.0882	-0.0882	-0.0882	-0.0882	-0.0882	3.5393	2.051	2.051	2.051	2.051	2.2508	2.051	-0.0882	2.051	2.051	3.0753	2.051	2.051	3.4036	2.051	2.051	1.2097	1.2096	1.2096	1.2096	1.2096	1.2096	1.2096	1.2096	1.2096	1.2096	1.2096	1.2096	1.2096	1.2096	1.2096
2h3mv[c][e]	-0.1492	0.3533	0.3169	0.3169	0.3169	0.3313	0.3313	0.3416	0.3317	0.3173	0.3173	0.4849	0.2906	0.4501	0.3169	0.9052	0.2944	0.3486	1.5384	0.548	0.548	0.548	0.5014	0.4809	0.5102	0.0688	0.503	0.503	0.4347	0.5788	0.5685	0.4872	0.535	0.5144	1.2078	1.1949	1.1949	1.1949	0.4119	1.4501	0.5147	0.4119	0.4935	0.4935	0.6625	0.5509	0.5541	0.4409	1.2172
2hatvacid[c][e]	0.419	0.1221	0.1228	0.1228	0.1228	0.1228	0.1228	0.1228	0.1228	0.1228	0.1228	0.1228	0.1228	0.1228	0.1228	0.1228	0.1228	0.1228	1.3991	0.497	0.497	0.497	0.497	0.5758	0.497	0.004	0.497	0.497	0.9984	0.497	0.497	1.2807	0.497	0.497	0.4723	0.4725	0.4725	0.4725	0.4725	0.4725	0.4725	0.4725	0.4725	0.4725	0.4725	0.4725	0.4725	0.4725	0.4725
2hatvlac[c][e]	0.419	0.1221	0.1228	0.1228	0.1228	0.1228	0.1228	0.1228	0.1228	0.1228	0.1228	0.1228	0.1228	0.1228	0.1228	0.1228	0.1228	0.1228	1.3991	0.497	0.497	0.497	0.497	0.5758	0.497	0.004	0.497	0.497	0.9984	0.497	0.497	1.2807	0.497	0.497	0.4723	0.4725	0.4725	0.4725	0.4725	0.4725	0.4725	0.4725	0.4725	0.4725	0.4725	0.4725	0.4725	0.4725	0.4725
2hb[c][e]	0.6361	-0.0696	-0.0686	-0.0686	-0.0686	-0.0686	-0.0686	-0.0686	-0.0686	-0.0686	-0.0686	-0.0686	-0.0686	-0.0686	-0.0686	-0.0685	-0.0686	-0.0686	-0.9591	-1.5888	-1.5888	-1.5888	-1.5888	-1.5299	-1.5888	0.1981	-1.5888	-1.5888	-1.2537	-1.5888	-1.5888	-1.038	-1.5888	-1.5888	-1.682	-1.6822	-1.6822	-1.6822	-1.6826	-1.682	-1.6826	-1.6826	-1.6826	-1.6826	-1.6825	-1.6826	-1.6826	-1.6826	-1.6822
2hexdtricoa[m][x]	0	0	0	0	0	0	0	0	0	0	0	0	0	0	0	0	0	0	0	0	0	0	0	0	0	0	0	0	0	0	0	0	0	0	0	0	0	0	0	0	0	0	0	0	0	0	0	0	0
2hiv[c][e]	-0.1492	0.3533	0.3169	0.3169	0.3169	0.3313	0.3313	0.3416	0.3317	0.3173	0.3173	0.4849	0.2906	0.4501	0.3169	0.9052	0.2944	0.3486	1.5384	0.548	0.548	0.548	0.5014	0.4809	0.5102	0.0683	0.503	0.503	0.4347	0.5788	0.5685	0.4872	0.535	0.5144	1.2078	1.1949	1.1949	1.1949	0.4119	1.4501	0.5147	0.4119	0.4935	0.4935	0.6625	0.5509	0.5541	0.4409	1.2172
2hyoxplac[c][e]	-0.1492	0.3533	0.3169	0.3169	0.3169	0.3317	0.3313	0.3416	0.3317	0.3173	0.3173	0.4849	0.2906	0.4501	0.3169	0.9052	0.2944	0.3486	1.5384	0.548	0.548	0.548	0.5014	0.4809	0.5105	0.0688	0.503	0.503	0.4347	0.5788	0.5685	0.4872	0.535	0.5144	1.2078	1.1949	1.1949	1.1949	0.4119	1.4501	0.5147	0.4119	0.4935	0.4935	0.6625	0.5509	0.5541	0.4409	1.2174
2kmb[c]	-0.1492	0.3533	0.3169	0.3169	0.3169	0.3313	0.3313	0.3416	0.3317	0.3173	0.3173	0.4849	0.2906	0.4501	0.3169	0.9052	0.2944	0.3486	1.538	0.5477	0.5477	0.5477	0.501	0.4806	0.5102	0.0683	0.5027	0.5027	0.4347	0.5785	0.5682	0.4869	0.5347	0.5141	1.2078	1.1951	1.1951	1.1951	0.4119	1.4501	0.5147	0.4119	0.4935	0.4935	0.6625	0.5509	0.5541	0.4409	1.2174
2m3hvac[c][e]	-0.1488	9.7602	9.6895	9.6895	9.6895	9.6895	9.6895	9.6895	9.6895	9.6895	9.6895	9.6895	9.6895	9.6895	9.6895	9.6895	9.6895	9.6895	1.539	0.5485	0.5485	0.5485	0.5018	0.4814	0.511	10.7121	0.5035	0.5035	0.4352	0.5792	0.569	0.4877	0.5355	0.5149	1.2085	1.1956	1.1956	1.1956	0.4127	1.4507	0.5152	0.4127	0.4943	0.4943	0.663	0.5514	0.5545	0.4413	1.2181
2m3ovac[c][m]	-0.1488	9.7602	9.6895	9.6895	9.6895	9.6895	9.6895	9.6895	9.6895	9.6895	9.6895	9.6895	9.6895	9.6895	9.6895	9.6895	9.6895	9.6895	1.539	0.5485	0.5485	0.5485	0.5018	0.4814	0.511	10.7121	0.5035	0.5035	0.4352	0.5792	0.569	0.4877	0.5355	0.5149	1.2085	1.1956	1.1956	1.1956	0.4127	1.4507	0.5152	0.4127	0.4943	0.4943	0.663	0.5514	0.5545	0.4413	1.2181
2m3ovcoa[m]	-0.1488	8.7602	8.6895	8.6895	8.6895	8.6895	8.6895	8.6895	8.6895	8.6895	8.6895	8.6895	8.6895	8.6895	8.6895	8.6895	8.6895	8.6895	1.539	0.5485	0.5485	0.5485	0.5018	0.4814	0.511	9.7121	0.5035	0.5035	0.4352	0.5792	0.569	0.4877	0.5355	0.5149	1.2085	1.1956	1.1956	1.1956	0.4127	1.4507	0.5152	0.4127	0.4943	0.4943	0.663	0.5514	0.5545	0.4413	1.2181
2maacoa[m]	-0.1497	0.3466	0.3112	0.3112	0.3112	0.3268	0.3268	0.3379	0.3268	0.3116	0.3116	0.4834	0.2837	0.4486	0.3112	0.9035	0.2875	0.3452	1.538	0.5476	0.5476	0.5476	0.5009	0.4805	0.51	0.0674	0.5025	0.5025	0.4342	0.5783	0.568	0.4867	0.5345	0.5139	1.2078	1.1949	1.1949	1.1949	0.4118	1.4499	0.5146	0.4118	0.4933	0.4933	0.6624	0.5504	0.5536	0.4407	1.2172
2mb2coa[c][m]	-0.1492	0.3534	0.317	0.317	0.317	0.3318	0.3315	0.3418	0.3318	0.3174	0.3174	0.485	0.2908	0.4501	0.317	0.9053	0.2946	0.3487	1.5384	0.5481	0.5481	0.5481	0.5014	0.4809	0.5106	0.0686	0.5031	0.5031	0.4348	0.5788	0.5686	0.4873	0.5351	0.5145	1.208	1.1951	1.1951	1.1951	0.4121	1.4502	0.5149	0.4121	0.4936	0.4936	0.6627	0.5511	0.5542	0.441	1.2176
2mbcoa[m]	0	0	0	0	0	0	0	0	0	0	0	0	0	0	0	0	0	0	0	0	0	0	0	0	0	0	0	0	0	0	0	0	0	0	0	0	0	0	0	0	0	0	0	0	0	0	0	0	0
2mop[c][m]	0.0282	0.0539	0.0539	0.0539	0.0539	0.0539	0.0539	0.0539	0.0539	0.0539	0.0539	0.0539	0.0539	0.0539	0.0539	0.054	0.0539	0.0539	0.0541	0.0539	0.0539	0.0539	0.0539	0.0539	0.0539	0.0539	0.0539	0.0539	0.0539	0.0539	0.0539	0.0539	0.0539	0.0539	0.054	0.054	0.054	0.054	0.0539	0.054	0.0539	0.0539	0.0539	0.0539	0.0539	0.0539	0.0539	0.0539	0.054
2mp2coa[m]	0.0282	0.0539	0.0539	0.0539	0.0539	0.0539	0.0539	0.0539	0.0539	0.0539	0.0539	0.0539	0.0539	0.0539	0.0539	0.0539	0.0539	0.0539	0.0539	0.0539	0.0539	0.0539	0.0539	0.0539	0.0539	0.0539	0.0539	0.0539	0.0539	0.0539	0.0539	0.0539	0.0539	0.0539	0.0539	0.0539	0.0539	0.0539	0.0539	0.0539	0.0539	0.0539	0.0539	0.0539	0.0539	0.0539	0.0539	0.0539	0.0539
2mpdhl[m]	0.0282	0.0539	0.0539	0.0539	0.0539	0.0539	0.0539	0.0539	0.0539	0.0539	0.0539	0.0539	0.0539	0.0539	0.0539	0.0539	0.0539	0.0539	0.0539	0.0539	0.0539	0.0539	0.0539	0.0539	0.0539	0.0539	0.0539	0.0539	0.0539	0.0539	0.0539	0.0539	0.0539	0.0539	0.0539	0.0539	0.0539	0.0539	0.0539	0.0539	0.0539	0.0539	0.0539	0.0539	0.0539	0.0539	0.0539	0.0539	0.0539
2obut[c][e][m]	-0.8865	0.3529	0.3167	0.3166	0.3167	0.3313	0.3311	0.3415	0.3314	0.3169	0.3169	0.4846	0.2904	0.4498	0.3167	0.9049	0.2942	0.3484	1.5381	0.5478	0.5478	0.5478	0.501	0.4805	0.51	0.068	0.5027	0.5027	0.4344	0.5785	0.5682	0.4869	0.5347	0.514	1.2078	1.195	1.195	1.195	0.4119	1.45	0.5146	0.4119	0.4935	0.4935	0.6625	0.5507	0.5539	0.4408	1.2173
2oxoadp[c][e][m]	-0.734	0.3532	0.3169	0.3169	0.3169	0.3315	0.3315	0.3418	0.3317	0.3172	0.3172	0.4849	0.2908	0.4502	0.3169	0.9053	0.2946	0.3487	1.5385	0.548	0.548	0.548	0.5013	0.4811	0.5104	0.0686	0.503	0.503	0.4349	0.5788	0.5685	0.4873	0.5349	0.5144	1.2079	1.195	1.195	1.195	0.4119	1.4501	0.5147	0.4119	0.4935	0.4935	0.6625	0.5508	0.554	0.4409	1.2174
2pg[c][e]	0.6302	0.5075	0.5074	0.5074	0.5074	0.5074	0.5074	0.5074	0.5074	0.5074	0.5074	0.5074	0.5074	0.5074	0.5074	0.5075	0.5074	0.5074	0.1945	-2.4365	-2.4365	-2.4365	-2.4365	-1.9015	-2.4365	1.0588	-2.4365	-2.4365	-0.4546	-2.4365	-2.4365	0.0201	-2.4365	-2.4365	-3.7749	-3.7746	-3.7746	-3.7746	-3.7747	-3.7745	-3.7747	-3.7747	-3.7747	-3.7747	-3.7747	-3.7747	-3.7747	-3.7747	-3.7746
34dhmald[c]	-0.1482	0.3537	0.3174	0.3174	0.3174	0.3318	0.3318	0.3421	0.3322	0.3178	0.3178	0.485	0.2911	0.4503	0.3174	0.9054	0.2949	0.349	1.5386	0.5482	0.5482	0.5482	0.5015	0.4811	0.5106	0.0692	0.5033	0.5033	0.4341	0.5789	0.5687	0.4872	0.5351	0.5145	1.2083	1.1954	1.1954	1.1954	0.4124	1.4505	0.515	0.4124	0.4939	0.4939	0.6627	0.5512	0.5544	0.4413	1.2178
34dhoxmand[c]	-0.1482	0.3536	0.3174	0.3174	0.3174	0.3318	0.3318	0.3421	0.3322	0.3178	0.3178	0.4849	0.2911	0.4503	0.3174	0.9054	0.2949	0.349	1.5385	0.5482	0.5482	0.5482	0.5013	0.4811	0.5105	0.0692	0.5033	0.5033	0.4341	0.5789	0.5687	0.4872	0.5351	0.5145	1.2083	1.1954	1.1954	1.1954	0.4124	1.4505	0.515	0.4124	0.4939	0.4939	0.6627	0.5512	0.5544	0.4413	1.2177
34dhoxpeg[c][e]	-0.1492	0.3533	0.3169	0.3169	0.3169	0.3313	0.3313	0.3416	0.3317	0.3173	0.3173	0.4849	0.2906	0.4501	0.3169	0.9052	0.2944	0.3486	1.5385	0.548	0.548	0.548	0.5014	0.4809	0.5105	0.0683	0.503	0.503	0.4347	0.5788	0.5685	0.4872	0.535	0.5144	1.2078	1.1949	1.1949	1.1949	0.4119	1.4501	0.5147	0.4119	0.4935	0.4935	0.6625	0.5509	0.5541	0.4409	1.2174
34dhpe[c][e]	-0.1492	0.3533	0.3169	0.3169	0.3169	0.3313	0.3313	0.3416	0.3317	0.3173	0.3173	0.4849	0.2906	0.4501	0.3169	0.9052	0.2944	0.3486	1.5384	0.548	0.548	0.548	0.5014	0.4809	0.5105	0.0683	0.503	0.503	0.4347	0.5788	0.5685	0.4872	0.535	0.5144	1.2078	1.1949	1.1949	1.1949	0.4119	1.4501	0.5147	0.4119	0.4935	0.4935	0.6625	0.5509	0.5541	0.4409	1.2174
34dhphe[c]	-0.1492	0.3533	0.3169	0.3169	0.3169	0.3317	0.3313	0.3416	0.3317	0.3173	0.3173	0.4849	0.2906	0.4501	0.3169	0.9052	0.2944	0.3486	1.5384	0.548	0.548	0.548	0.5014	0.4809	0.5102	0.0683	0.503	0.503	0.4347	0.5788	0.5685	0.4872	0.535	0.5144	1.2078	1.1949	1.1949	1.1949	0.4119	1.4501	0.5147	0.4119	0.4935	0.4935	0.6625	0.5509	0.5541	0.4409	1.2174
34hpl[c][e][m]	-0.1483	0.3538	0.3178	0.3178	0.3178	0.3323	0.3323	0.3425	0.3326	0.3178	0.3178	0.4852	0.2916	0.4506	0.3178	0.9057	0.2954	0.3495	1.5396	0.549	0.549	0.549	0.5023	0.4818	0.5114	0.0688	0.5039	0.5039	0.4356	0.5797	0.5694	0.4881	0.5359	0.5153	1.209	1.1961	1.1961	1.1961	0.4132	1.4511	0.5156	0.4132	0.4947	0.4947	0.6637	0.5518	0.555	0.4421	1.2185
34hpp[c][e][m]	-0.286	-0.6005	-0.6032	-0.6032	-0.6032	-0.6032	-0.6032	-0.6032	-0.6032	-0.6032	-0.6032	-0.6032	-0.6032	-0.6032	-0.6032	-0.6032	-0.6032	-0.6032	0.1523	0.1523	0.1523	0.1523	0.1523	0.1523	0.1523	-1.5105	0.1523	0.1523	0.1523	0.1523	0.1523	0.1523	0.1523	0.1523	0.1523	0.1523	0.1523	0.1523	0.1523	0.1523	0.1523	0.1523	0.1523	0.1523	0.1523	0.1523	0.1523	0.1523	0.1523
35dhpvs[c][e]	0.419	0.1221	0.1228	0.1228	0.1228	0.1228	0.1228	0.1228	0.1228	0.1228	0.1228	0.1228	0.1228	0.1228	0.1228	0.1228	0.1228	0.1228	1.3991	0.497	0.497	0.497	0.497	0.5758	0.497	0.004	0.497	0.497	0.9984	0.497	0.497	1.2807	0.497	0.497	0.4723	0.4725	0.4725	0.4725	0.4725	0.4725	0.4725	0.4725	0.4725	0.4725	0.4725	0.4725	0.4725	0.4725	0.4725
35diotyr[c][e]	-0.1492	0.3533	0.3169	0.3169	0.3169	0.3313	0.3313	0.3416	0.3317	0.3173	0.3173	0.4849	0.2906	0.4501	0.3169	0.9052	0.2944	0.3486	1.5384	0.548	0.548	0.548	0.5014	0.4809	0.5102	0.0688	0.503	0.503	0.4347	0.5788	0.5685	0.4872	0.535	0.5144	1.2078	1.1949	1.1949	1.1949	0.4119	1.4501	0.5147	0.4119	0.4935	0.4935	0.6625	0.5509	0.5541	0.4409	1.2172
3bcrn[c][e]	-0.1492	0.3533	0.3169	0.3169	0.3169	0.3313	0.3313	0.3416	0.3317	0.3173	0.3173	0.4849	0.2906	0.4501	0.3169	0.9052	0.2944	0.3486	1.5384	0.548	0.548	0.548	0.5014	0.4809	0.5105	0.0688	0.503	0.503	0.4347	0.5788	0.5685	0.4872	0.535	0.5144	1.2078	1.1949	1.1949	1.1949	0.4119	1.4501	0.5147	0.4119	0.4935	0.4935	0.6625	0.5509	0.5541	0.4409	1.2174
3ddcrn[c][e]	-0.1492	0.3533	0.3169	0.3169	0.3169	0.3313	0.3313	0.3416	0.3317	0.3173	0.3173	0.4849	0.2906	0.4501	0.3169	0.9052	0.2944	0.3486	1.5384	0.548	0.548	0.548	0.5014	0.4809	0.5105	0.0688	0.503	0.503	0.4347	0.5788	0.5685	0.4872	0.535	0.5144	1.2078	1.1949	1.1949	1.1949	0.4119	1.4501	0.5147	0.4119	0.4935	0.4935	0.6625	0.5509	0.5541	0.4409	1.2174
3ddecdicoa[m][x]	29.3112	0	0	0	0	0	0	0	0	0	0	0	0	0	0	0	0	0	0	0	0	0	0	0	0	0	0	0	0	0	0	0	0	0	0	0	0	0	0	0	0	0	0	0	0	0	0	0	0
3deccrn[c][e]	-0.1492	0.3533	0.3169	0.3169	0.3169	0.3317	0.3313	0.3416	0.3317	0.3173	0.3173	0.4849	0.2906	0.4501	0.3169	0.9052	0.2944	0.3486	1.5384	0.548	0.548	0.548	0.5014	0.4809	0.5105	0.0688	0.503	0.503	0.4347	0.5788	0.5685	0.4872	0.535	0.5144	1.2078	1.1949	1.1949	1.1949	0.4119	1.4501	0.5147	0.4119	0.4935	0.4935	0.6625	0.5509	0.5541	0.4409	1.2174
3dhcdchol[c][e]	-0.1488	0.353	0.3166	0.3166	0.3166	0.3314	0.3314	0.3417	0.3314	0.317	0.317	0.4847	0.2907	0.4502	0.317	0.9052	0.2945	0.3487	1.5385	0.5479	0.5479	0.5479	0.5012	0.4807	0.5103	0.0688	0.5028	0.5028	0.4348	0.5786	0.5687	0.4873	0.5348	0.5142	1.2077	1.1948	1.1948	1.1948	0.4117	1.4498	0.5145	0.4117	0.4933	0.4933	0.6624	0.5507	0.5536	0.4406	1.2171
3dhchol[c][e]	-0.1488	0.353	0.3166	0.3166	0.3166	0.3314	0.3314	0.3417	0.3314	0.317	0.317	0.4847	0.2907	0.4502	0.317	0.9052	0.2945	0.3487	1.5385	0.5479	0.5479	0.5479	0.5012	0.4807	0.5103	0.0688	0.5028	0.5028	0.4348	0.5786	0.5687	0.4873	0.5348	0.5142	1.2077	1.1948	1.1948	1.1948	0.4117	1.4498	0.5145	0.4117	0.4933	0.4933	0.6624	0.5507	0.5536	0.4406	1.2171
3dhdchol[c][e]	-0.1488	0.353	0.3166	0.3166	0.3166	0.3314	0.3314	0.3417	0.3314	0.317	0.317	0.4847	0.2907	0.4502	0.317	0.9052	0.2945	0.3487	1.5385	0.5479	0.5479	0.5479	0.5012	0.4807	0.5103	0.0688	0.5028	0.5028	0.4348	0.5786	0.5687	0.4873	0.5348	0.5142	1.2077	1.1948	1.1948	1.1948	0.4117	1.4498	0.5145	0.4117	0.4933	0.4933	0.6624	0.5507	0.5536	0.4406	1.2171
3dhguln[c]	-0.1488	0.3516	0.3151	0.3151	0.3151	0.33	0.33	0.3403	0.3303	0.3155	0.3155	0.4817	0.2892	0.4485	0.3155	0.9032	0.293	0.3472	1.5391	0.5488	0.5488	0.5488	0.5018	0.4814	0.511	0.0666	0.5038	0.5038	0.4355	0.5795	0.5693	0.488	0.5358	0.5152	1.2085	1.1956	1.1956	1.1956	0.4124	1.4507	0.5152	0.4124	0.4939	0.4939	0.663	0.5514	0.5545	0.4413	1.2179
3dhlchol[c][e]	-0.1488	0.353	0.3166	0.3166	0.3166	0.3314	0.3314	0.3417	0.3314	0.317	0.317	0.4847	0.2907	0.4502	0.317	0.9052	0.2945	0.3487	1.5385	0.5479	0.5479	0.5479	0.5012	0.4807	0.5103	0.0688	0.5028	0.5028	0.4348	0.5786	0.5687	0.4873	0.5348	0.5142	1.2077	1.1948	1.1948	1.1948	0.4117	1.4498	0.5145	0.4117	0.4933	0.4933	0.6624	0.5507	0.5536	0.4406	1.2171
3dsphgn[c]	29.7036	0	0	0	0	0	0	0	0	0	0	0	0	0	0	0	0	0	0	0	0	0	0	0	0	0	0	0	0	0	0	0	0	0	0	0	0	0	0	0	0	0	0	0	0	0	0	0	0
3hbcoa[m][x]	-10.1932	-11.138	-11.1744	-11.1744	-11.1744	-11.1596	-11.1598	-11.1493	-11.1596	-11.174	-11.174	-11.0064	-11.2007	-11.0412	-11.1744	-10.586	-11.1969	-11.1424	-9.9527	-10.9431	-10.9431	-10.9431	-10.9899	-11.0104	-10.9808	-11.4226	-10.9881	-10.9881	-11.0564	-10.9124	-10.9226	-11.0039	-10.9561	-10.9767	-10.2836	-10.2965	-10.2965	-10.2965	-11.0796	-10.0413	-10.9767	-11.0796	-10.998	-10.998	-10.8293	-10.9405	-10.9372	-11.0506	-10.2742
3hbcoa_R[c][m]	-0.1492	0.3533	0.3169	0.3169	0.3169	0.3313	0.3313	0.3416	0.3317	0.3173	0.3173	0.4849	0.2906	0.4501	0.3169	0.9052	0.2944	0.3486	1.5384	0.548	0.548	0.548	0.5014	0.4809	0.5105	0.0688	0.503	0.503	0.4347	0.5788	0.5685	0.4872	0.535	0.5144	1.2078	1.1949	1.1949	1.1949	0.4119	1.4501	0.5147	0.4119	0.4935	0.4935	0.6625	0.5509	0.5541	0.4409	1.2174
3hdcoa[c][m][x]	8.6252	8.143	8.1384	8.1384	8.1384	8.1385	8.1385	8.1385	8.1385	8.1384	8.1384	8.1389	8.1384	8.1388	8.1384	8.1403	8.1384	8.1385	1.5408	9.6015	9.6015	9.6015	9.6014	9.4834	9.6014	7.6227	9.6014	9.6014	0.4373	9.6015	9.6015	0.4896	9.6015	9.6015	9.5154	9.5154	9.5154	9.5154	9.5142	9.5159	9.5143	9.5142	9.5143	9.5143	9.5145	9.5144	9.5144	9.5143	9.5154
3hddcoa[c][m][x]	8.648	8.1605	8.1559	8.1559	8.1559	8.1559	8.1559	8.1559	8.1559	8.1559	8.1559	8.1563	8.1558	8.1562	8.1559	8.1578	8.1558	8.156	1.5401	9.6189	9.6189	9.6189	9.6189	9.5008	9.6189	7.6401	9.6189	9.6189	0.4364	9.619	9.6189	0.4887	9.6189	9.6189	9.5329	9.5328	9.5328	9.5328	9.5317	9.5333	9.5318	9.5317	9.5317	9.5317	9.532	9.5318	9.5318	9.5317	9.5328
3hdeccoa[c][m]	-0.1492	0.3533	0.3169	0.3169	0.3169	0.3317	0.3313	0.3416	0.3317	0.3173	0.3173	0.4849	0.2906	0.4501	0.3169	0.9052	0.2944	0.3486	1.5384	0.548	0.548	0.548	0.5014	0.4809	0.5105	0.0688	0.503	0.503	0.4347	0.5788	0.5685	0.4872	0.535	0.5144	1.2078	1.1949	1.1949	1.1949	0.4119	1.4501	0.5147	0.4119	0.4935	0.4935	0.6625	0.5509	0.5541	0.4409	1.2174
3hdececrn[c][e]	-0.1492	0.3533	0.3169	0.3169	0.3169	0.3317	0.3313	0.3416	0.3317	0.3173	0.3173	0.4849	0.2906	0.4501	0.3169	0.9052	0.2944	0.3486	1.5384	0.548	0.548	0.548	0.5014	0.4809	0.5105	0.0688	0.503	0.503	0.4347	0.5788	0.5685	0.4872	0.535	0.5144	1.2078	1.1949	1.1949	1.1949	0.4119	1.4501	0.5147	0.4119	0.4935	0.4935	0.6625	0.5509	0.5541	0.4409	1.2174
3hexdcoa[c][m]	-0.1492	0.3533	0.3169	0.3169	0.3169	0.3313	0.3313	0.3416	0.3317	0.3173	0.3173	0.4849	0.2906	0.4501	0.3169	0.9052	0.2944	0.3486	1.5384	0.548	0.548	0.548	0.5014	0.4809	0.5105	0.0688	0.503	0.503	0.4347	0.5788	0.5685	0.4872	0.535	0.5144	1.2078	1.1949	1.1949	1.1949	0.4119	1.4501	0.5147	0.4119	0.4935	0.4935	0.6625	0.5509	0.5541	0.4409	1.2174
3hexdcrn[c][e]	-0.1492	0.3533	0.3169	0.3169	0.3169	0.3313	0.3313	0.3416	0.3317	0.3173	0.3173	0.4849	0.2906	0.4501	0.3169	0.9052	0.2944	0.3486	1.5384	0.548	0.548	0.548	0.5014	0.4809	0.5105	0.0688	0.503	0.503	0.4347	0.5788	0.5685	0.4872	0.535	0.5144	1.2078	1.1949	1.1949	1.1949	0.4119	1.4501	0.5147	0.4119	0.4935	0.4935	0.6625	0.5509	0.5541	0.4409	1.2174
3hexdtricoa[m][x]	0	0	0	0	0	0	0	0	0	0	0	0	0	0	0	0	0	0	0	0	0	0	0	0	0	0	0	0	0	0	0	0	0	0	0	0	0	0	0	0	0	0	0	0	0	0	0	0	0
3hibutcoa[m]	0.0282	0.0539	0.0539	0.0539	0.0539	0.0539	0.0539	0.0539	0.0539	0.0539	0.0539	0.0539	0.0539	0.0539	0.0539	0.0539	0.0539	0.0539	0.0539	0.0539	0.0539	0.0539	0.0539	0.0539	0.0539	0.0539	0.0539	0.0539	0.0539	0.0539	0.0539	0.0539	0.0539	0.0539	0.0539	0.0539	0.0539	0.0539	0.0539	0.0539	0.0539	0.0539	0.0539	0.0539	0.0539	0.0539	0.0539	0.0539	0.0539
3hmbcoa[m]	-0.1495	0.3501	0.3143	0.3143	0.3143	0.3295	0.3295	0.3401	0.3295	0.3146	0.3146	0.4843	0.2876	0.4495	0.3143	0.9045	0.2914	0.3472	1.5384	0.548	0.548	0.548	0.5013	0.4807	0.5104	0.0679	0.5029	0.5029	0.4346	0.5787	0.5684	0.4871	0.5349	0.5143	1.2082	1.1953	1.1953	1.1953	0.4122	1.4503	0.515	0.4122	0.4937	0.4937	0.6627	0.551	0.5541	0.4411	1.2176
3hmp[c][e][m]	0.0282	0.0539	0.0539	0.0539	0.0539	0.0539	0.0539	0.0539	0.0539	0.0539	0.0539	0.0539	0.0539	0.0539	0.0539	0.054	0.0539	0.0539	0.0541	0.0539	0.0539	0.0539	0.0539	0.0539	0.0539	0.0539	0.0539	0.0539	0.0539	0.0539	0.0539	0.0539	0.0539	0.0539	0.054	0.054	0.054	0.054	0.0539	0.054	0.0539	0.0539	0.0539	0.0539	0.0539	0.0539	0.0539	0.0539	0.054
3hodcoa[c][m]	-0.1492	0.3533	0.3169	0.3169	0.3169	0.3317	0.3313	0.3416	0.3317	0.3173	0.3173	0.4849	0.2906	0.4501	0.3169	0.9052	0.2944	0.3486	1.5384	0.548	0.548	0.548	0.5014	0.4809	0.5105	0.0688	0.503	0.503	0.4347	0.5788	0.5685	0.4872	0.535	0.5144	1.2078	1.1949	1.1949	1.1949	0.4119	1.4501	0.5147	0.4119	0.4935	0.4935	0.6625	0.5509	0.5541	0.4409	1.2174
3hpcoa[m]	-0.1478	0.355	0.3187	0.3187	0.3187	0.3331	0.3331	0.3434	0.3335	0.3191	0.3191	0.4863	0.2924	0.4518	0.3187	0.9069	0.2962	0.3503	1.5401	0.5498	0.5498	0.5498	0.5031	0.4823	0.5122	0.0701	0.5047	0.5047	0.4364	0.5805	0.5702	0.4889	0.5367	0.5161	1.2098	1.1969	1.1969	1.1969	0.414	1.4521	0.5168	0.414	0.4955	0.4955	0.6645	0.5529	0.5558	0.4429	1.2194
3hpvs[c][e]	-0.7038	-1.0007	-1	-1	-1	-1	-1	-1	-1	-1	-1	-1	-1	-1	-1	-1	-1	-1	0.7027	-0.6258	-0.6258	-0.6258	-0.6258	-0.5471	-0.6258	-1.1188	-0.6258	-0.6258	0.4574	-0.6258	-0.6258	0.627	-0.6258	-0.6258	-0.6505	-0.6504	-0.6504	-0.6504	-0.6504	-0.6504	-0.6504	-0.6504	-0.6504	-0.6504	-0.6504	-0.6504	-0.6504	-0.6504	-0.6504
3hpvscoa[c][m][x]	-12.3306	-11.8281	-11.8643	-11.8643	-11.8643	-11.8497	-11.8497	-11.8396	-11.8495	-11.8641	-11.8641	-11.6965	-11.8904	-11.7312	-11.8643	-11.276	-11.8868	-11.8325	-0.2631	-11.6336	-11.6336	-11.6336	-11.6802	-11.7003	-11.6711	-12.1126	-11.6783	-11.6783	-0.1337	-11.6027	-11.6128	-0.222	-11.6466	-11.6672	-10.9731	-10.986	-10.986	-10.986	-11.769	-10.731	-11.6664	-11.769	-11.6875	-11.6875	-11.5186	-11.6302	-11.6271	-11.7401	-10.9637
3hpvstet[c][e]	-13.3302	-12.8274	-12.8638	-12.8638	-12.8638	-12.849	-12.849	-12.8387	-12.849	-12.8634	-12.8634	-12.6962	-12.8897	-12.7307	-12.8638	-12.2755	-12.8859	-12.8318	-0.2634	-12.6324	-12.6324	-12.6324	-12.6794	-12.6995	-12.6703	-13.1118	-12.6775	-12.6775	-0.1338	-12.6021	-12.612	-0.2221	-12.6455	-12.6661	-11.972	-11.9849	-11.9849	-11.9849	-12.7681	-11.7299	-12.6654	-12.7681	-12.6863	-12.6863	-12.518	-12.629	-12.6258	-12.7392	-11.9626
3hpvstetcoa[c][m][x]	-12.3306	-11.8281	-11.8643	-11.8643	-11.8643	-11.8497	-11.8497	-11.8396	-11.8495	-11.8641	-11.8641	-11.6965	-11.8904	-11.7312	-11.8643	-11.276	-11.8868	-11.8325	-0.2631	-11.6336	-11.6336	-11.6336	-11.6802	-11.7003	-11.6711	-12.1126	-11.6783	-11.6783	-0.1337	-11.6027	-11.6128	-0.222	-11.6466	-11.6672	-10.9731	-10.986	-10.986	-10.986	-11.769	-10.731	-11.6664	-11.769	-11.6875	-11.6875	-11.5186	-11.6302	-11.6271	-11.7401	-10.9637
3htdcoa[c][m][x]	-0.1492	0.3533	0.3169	0.3169	0.3169	0.3317	0.3313	0.3416	0.3317	0.3173	0.3173	0.4849	0.2906	0.4501	0.3169	0.9052	0.2944	0.3486	1.5384	0.548	0.548	0.548	0.5014	0.4809	0.5105	0.0688	0.503	0.503	0.4347	0.5788	0.5685	0.4872	0.535	0.5144	1.2078	1.1949	1.1949	1.1949	0.4119	1.4501	0.5147	0.4119	0.4935	0.4935	0.6625	0.5509	0.5541	0.4409	1.2174
3ispvs[c][e]	0.419	0.1221	0.1228	0.1228	0.1228	0.1228	0.1228	0.1228	0.1228	0.1228	0.1228	0.1228	0.1228	0.1228	0.1228	0.1228	0.1228	0.1228	1.3991	0.497	0.497	0.497	0.497	0.5758	0.497	0.004	0.497	0.497	0.9984	0.497	0.497	1.2807	0.497	0.497	0.4723	0.4725	0.4725	0.4725	0.4725	0.4725	0.4725	0.4725	0.4725	0.4725	0.4725	0.4725	0.4725	0.4725	0.4725
3ityr_L[c][e]	-0.1492	0.3533	0.3169	0.3169	0.3169	0.3313	0.3313	0.3416	0.3317	0.3173	0.3173	0.4849	0.2906	0.4501	0.3169	0.9052	0.2944	0.3486	1.5384	0.548	0.548	0.548	0.5014	0.4809	0.5102	0.0683	0.503	0.503	0.4347	0.5788	0.5685	0.4872	0.535	0.5144	1.2078	1.1949	1.1949	1.1949	0.4119	1.4501	0.5147	0.4119	0.4935	0.4935	0.6625	0.5509	0.5541	0.4409	1.2172
3ivcoa[c][m]	-0.1492	0.3533	0.3169	0.3169	0.3169	0.3313	0.3313	0.3416	0.3317	0.3173	0.3173	0.4849	0.2906	0.4501	0.3169	0.9052	0.2944	0.3486	1.5385	0.548	0.548	0.548	0.5014	0.4809	0.5105	0.0683	0.503	0.503	0.4347	0.5788	0.5685	0.4872	0.535	0.5144	1.2078	1.1949	1.1949	1.1949	0.4119	1.4501	0.5147	0.4119	0.4935	0.4935	0.6625	0.5509	0.5541	0.4409	1.2174
3ivcrn[c][e]	-0.1492	0.3533	0.3169	0.3169	0.3169	0.3313	0.3313	0.3416	0.3317	0.3173	0.3173	0.4849	0.2906	0.4501	0.3169	0.9052	0.2944	0.3486	1.5385	0.548	0.548	0.548	0.5014	0.4809	0.5105	0.0683	0.503	0.503	0.4347	0.5788	0.5685	0.4872	0.535	0.5144	1.2078	1.1949	1.1949	1.1949	0.4119	1.4501	0.5147	0.4119	0.4935	0.4935	0.6625	0.5509	0.5541	0.4409	1.2174
3mb2coa[m]	0	0	0	0	0	0	0	0	0	0	0	0	0	0	0	0	0	0	0	0	0	0	0	0	0	0	0	0	0	0	0	0	0	0	0	0	0	0	0	0	0	0	0	0	0	0	0	0	0
3meacmp[c][r]	-0.1492	0.3533	0.3169	0.3169	0.3169	0.3317	0.3313	0.3416	0.3317	0.3173	0.3173	0.4849	0.2906	0.4501	0.3169	0.9052	0.2944	0.3486	1.5384	0.548	0.548	0.548	0.5014	0.4809	0.5105	0.0688	0.503	0.503	0.4347	0.5788	0.5685	0.4872	0.535	0.5144	1.2078	1.1949	1.1949	1.1949	0.4119	1.4501	0.5147	0.4119	0.4935	0.4935	0.6625	0.5509	0.5541	0.4409	1.2174
3mgcoa[m]	-0.1492	0.3533	0.3169	0.3169	0.3169	0.3317	0.3313	0.342	0.3317	0.3173	0.3173	0.4849	0.2906	0.4501	0.3169	0.9052	0.2944	0.3486	1.5384	0.548	0.548	0.548	0.5014	0.4809	0.5102	0.0683	0.503	0.503	0.4347	0.5788	0.5685	0.4872	0.535	0.5144	1.208	1.1951	1.1951	1.1951	0.4119	1.4501	0.5147	0.4119	0.4935	0.4935	0.6625	0.5509	0.5541	0.4409	1.2174
3mhis[c][e]	0.2769	0.1491	0.1501	0.1501	0.1501	0.1501	0.1501	0.1501	0.1501	0.1501	0.1501	0.1501	0.1501	0.1501	0.1501	0.1501	0.1501	0.1501	1.9803	1.0546	1.0546	1.0546	1.0546	1.1568	1.0546	-0.105	1.0546	1.0546	1.6211	1.0546	1.0546	1.8805	1.0546	1.0546	0.9691	0.9691	0.9691	0.9691	0.9691	0.9692	0.9691	0.9691	0.9691	0.9691	0.9691	0.9691	0.9691	0.9691	0.9691
3mob[c][e][m]	0.0282	0.0539	0.0539	0.0539	0.0539	0.0539	0.0539	0.0539	0.0539	0.0539	0.0539	0.0539	0.0539	0.0539	0.0539	0.054	0.0539	0.0539	0.0541	0.0539	0.0539	0.0539	0.0539	0.0539	0.0539	0.0539	0.0539	0.0539	0.0539	0.054	0.054	0.0539	0.0539	0.0539	0.0541	0.0541	0.0541	0.0541	0.0539	0.0541	0.0539	0.0539	0.0539	0.0539	0.054	0.054	0.054	0.0539	0.0541
3mop[c][e][m]	-0.1492	0.3534	0.317	0.317	0.317	0.3315	0.3315	0.3418	0.3318	0.3174	0.3174	0.485	0.2908	0.4501	0.317	0.9053	0.2946	0.3487	1.5384	0.5481	0.5481	0.5481	0.5014	0.4809	0.5102	0.0686	0.5031	0.5031	0.4348	0.5788	0.5686	0.4873	0.5351	0.5145	1.208	1.1951	1.1951	1.1951	0.4121	1.4503	0.5149	0.4121	0.4936	0.4936	0.6627	0.5511	0.5542	0.441	1.2175
3mox4hoxm[c][e]	-1.1488	0.3534	0.3172	0.3172	0.3172	0.3318	0.3318	0.3421	0.332	0.3176	0.3176	0.4849	0.2911	0.4503	0.3172	0.9054	0.2949	0.349	1.5383	0.5482	0.5482	0.5482	0.5013	0.4811	0.5105	0.0692	0.5031	0.5031	0.434	0.5788	0.5687	0.487	0.5351	0.5145	1.2081	1.1952	1.1952	1.1952	0.4122	1.4503	0.5149	0.4122	0.4938	0.4938	0.6626	0.551	0.5542	0.4412	1.2175
3ocddcoa[c][m]	-0.1492	0.3533	0.3169	0.3169	0.3169	0.3317	0.3313	0.3416	0.3317	0.3173	0.3173	0.4849	0.2906	0.4501	0.3169	0.9052	0.2944	0.3486	1.5384	0.548	0.548	0.548	0.5014	0.4809	0.5105	0.0688	0.503	0.503	0.4347	0.5788	0.5685	0.4872	0.535	0.5144	1.2078	1.1951	1.1951	1.1951	0.4119	1.4501	0.5147	0.4119	0.4935	0.4935	0.6625	0.5509	0.5541	0.4409	1.2174
3octdec2crn[c][e]	-0.1492	0.3533	0.3169	0.3169	0.3169	0.3317	0.3313	0.3416	0.3317	0.3173	0.3173	0.4849	0.2906	0.4501	0.3169	0.9052	0.2944	0.3486	1.5384	0.548	0.548	0.548	0.5014	0.4809	0.5105	0.0688	0.503	0.503	0.4347	0.5788	0.5685	0.4872	0.535	0.5144	1.2078	1.1951	1.1951	1.1951	0.4119	1.4501	0.5147	0.4119	0.4935	0.4935	0.6625	0.5509	0.5541	0.4409	1.2174
3octdeccrn[c][e]	-0.1492	0.3533	0.3169	0.3169	0.3169	0.3317	0.3313	0.3416	0.3317	0.3173	0.3173	0.4849	0.2906	0.4501	0.3169	0.9052	0.2944	0.3486	1.5384	0.548	0.548	0.548	0.5014	0.4809	0.5105	0.0688	0.503	0.503	0.4347	0.5788	0.5685	0.4872	0.535	0.5144	1.2078	1.1949	1.1949	1.1949	0.4119	1.4501	0.5147	0.4119	0.4935	0.4935	0.6625	0.5509	0.5541	0.4409	1.2174
3octdece1coa[c][m]	-0.1492	0.3533	0.3169	0.3169	0.3169	0.3313	0.3313	0.3416	0.3317	0.3173	0.3173	0.4849	0.2906	0.4501	0.3169	0.9052	0.2944	0.3486	1.5384	0.548	0.548	0.548	0.5014	0.4809	0.5102	0.0683	0.503	0.503	0.4347	0.5788	0.5685	0.4872	0.535	0.5144	1.2078	1.1949	1.1949	1.1949	0.4119	1.4501	0.5147	0.4119	0.4935	0.4935	0.6625	0.5509	0.5541	0.4409	1.2172
3octdece1crn[c][e]	-0.1492	0.3533	0.3169	0.3169	0.3169	0.3313	0.3313	0.3416	0.3317	0.3173	0.3173	0.4849	0.2906	0.4501	0.3169	0.9052	0.2944	0.3486	1.5384	0.548	0.548	0.548	0.5014	0.4809	0.5102	0.0683	0.503	0.503	0.4347	0.5788	0.5685	0.4872	0.535	0.5144	1.2078	1.1949	1.1949	1.1949	0.4119	1.4501	0.5147	0.4119	0.4935	0.4935	0.6625	0.5509	0.5541	0.4409	1.2172
3odcoa[m][x]	7.9265	7.438	7.4335	7.4335	7.4335	7.4335	7.4335	7.4335	7.4335	7.4335	7.4335	7.4335	7.4335	7.4335	7.4335	7.4335	7.4335	7.4335	1.5444	8.8988	8.8988	8.8988	8.8988	8.7806	8.8988	6.917	8.8988	8.8988	0.441	8.8988	8.8988	0.4933	8.8988	8.8988	8.8116	8.8115	8.8115	8.8115	8.8115	8.8115	8.8115	8.8115	8.8115	8.8115	8.8115	8.8115	8.8115	8.8115	8.8115
3oddcoa[m][x]	7.9908	7.4813	7.4768	7.4768	7.4768	7.4768	7.4768	7.4768	7.4768	7.4768	7.4768	7.4768	7.4768	7.4768	7.4768	7.4768	7.4768	7.4768	1.543	8.942	8.942	8.942	8.942	8.8238	8.942	6.9603	8.942	8.942	0.4393	8.942	8.942	0.4915	8.942	8.942	8.8549	8.8548	8.8548	8.8548	8.8548	8.8548	8.8548	8.8548	8.8548	8.8548	8.8548	8.8548	8.8548	8.8548	8.8548
3ohacmp[c][e][r]	-0.1492	0.3533	0.3169	0.3169	0.3169	0.3313	0.3313	0.3416	0.3317	0.3173	0.3173	0.4849	0.2906	0.4501	0.3169	0.9052	0.2944	0.3486	1.5384	0.548	0.548	0.548	0.5014	0.4809	0.5105	0.0688	0.503	0.503	0.4347	0.5788	0.5685	0.4872	0.535	0.5144	1.2078	1.1949	1.1949	1.1949	0.4119	1.4501	0.5147	0.4119	0.4935	0.4935	0.6625	0.5509	0.5541	0.4409	1.2172
3ohodcoa[c][m][x]	-0.1492	0.3533	0.3169	0.3169	0.3169	0.3313	0.3313	0.3416	0.3317	0.3173	0.3173	0.4849	0.2906	0.4501	0.3169	0.9052	0.2944	0.3486	1.5384	0.548	0.548	0.548	0.501	0.4809	0.5102	0.0683	0.503	0.503	0.4347	0.5788	0.5685	0.4872	0.535	0.5144	1.2078	1.1949	1.1949	1.1949	0.4119	1.4501	0.5147	0.4119	0.4935	0.4935	0.6625	0.5509	0.5541	0.4409	1.2172
3pg[c][e][m]	0.6302	0.5075	0.5074	0.5074	0.5074	0.5074	0.5074	0.5074	0.5074	0.5074	0.5074	0.5074	0.5074	0.5074	0.5074	0.5075	0.5074	0.5074	0.1945	-2.4365	-2.4365	-2.4365	-2.4365	-1.9015	-2.4365	1.1142	-2.4365	-2.4365	-0.4546	-2.4365	-2.4365	0.0201	-2.4365	-2.4365	-8.2636	-8.26	-8.26	-8.26	-8.2631	-8.2586	-8.2628	-8.2631	-8.2628	-8.2628	-8.2623	-8.2627	-8.2626	-8.263	-8.2599
3php[c]	0	0	0	0	0	0	0	0	0	0	0	0	0	0	0	0	0	0	0	0	0	0	0	0	0	39.3363	0	0	0	0	0	0	0	0	0	0	0	0	0	0	0	0	0	0	0	0	0	0	0
3sala[c][m]	15.3914	15.3611	15.3618	15.3618	15.3618	15.3618	15.3618	15.3618	15.3618	15.3618	15.3618	15.3618	15.3618	15.3618	15.3618	15.3618	15.3618	15.3618	1.5437	6.5549	6.5549	6.5549	6.5549	0.4856	6.5549	14.7567	6.5549	6.5549	0.4401	6.5549	6.5549	0.4923	6.5549	6.5549	12.8874	12.8873	12.8873	12.8873	12.8873	12.8873	12.8873	12.8873	12.8873	12.8873	12.8873	12.8873	12.8873	12.8873	12.8873
3snpyr[c][m]	40.2776	40.2474	40.2481	40.2481	40.2481	40.2481	40.2481	40.2481	40.2481	40.2481	40.2481	40.2481	40.2481	40.2481	40.2481	40.2481	40.2481	40.2481	0	31.4411	31.4411	31.4411	31.4411	0	31.4411	39.6429	31.4411	31.4411	0	31.4411	31.4411	0	31.4411	31.4411	37.7736	37.7736	37.7736	37.7736	37.7736	37.7736	37.7736	37.7736	37.7736	37.7736	37.7736	37.7736	37.7736	37.7736	37.7736
3spyr[c]	-0.1492	0.3533	0.3169	0.3169	0.3169	0.3317	0.3313	0.3416	0.3317	0.3173	0.3173	0.4849	0.2906	0.4501	0.3169	0.9052	0.2944	0.3486	1.5384	0.548	0.548	0.548	0.501	0.4809	0.5102	0.0683	0.503	0.503	0.4347	0.5788	0.5685	0.4872	0.535	0.5144	1.2078	1.1949	1.1949	1.1949	0.4119	1.4501	0.5147	0.4119	0.4935	0.4935	0.6625	0.5509	0.5541	0.4409	1.2172
3tdcrn[c][e]	-0.1492	0.3533	0.3169	0.3169	0.3169	0.3317	0.3313	0.3416	0.3317	0.3173	0.3173	0.4849	0.2906	0.4501	0.3169	0.9052	0.2944	0.3486	1.5384	0.548	0.548	0.548	0.5014	0.4809	0.5105	0.0688	0.503	0.503	0.4347	0.5788	0.5685	0.4872	0.535	0.5144	1.2078	1.1949	1.1949	1.1949	0.4119	1.4501	0.5147	0.4119	0.4935	0.4935	0.6625	0.5509	0.5541	0.4409	1.2174
3tetd7ecoa[c][m]	-0.1492	0.3533	0.3169	0.3169	0.3169	0.3317	0.3313	0.3416	0.3317	0.3173	0.3173	0.4849	0.2906	0.4501	0.3169	0.9052	0.2944	0.3486	1.5384	0.548	0.548	0.548	0.5014	0.4809	0.5105	0.0688	0.503	0.503	0.4347	0.5788	0.5685	0.4872	0.535	0.5144	1.2078	1.1949	1.1949	1.1949	0.4119	1.4501	0.5147	0.4119	0.4935	0.4935	0.6625	0.5509	0.5541	0.4409	1.2174
3tetd7ecoacrn[c][e]	-0.1492	0.3533	0.3169	0.3169	0.3169	0.3317	0.3313	0.3416	0.3317	0.3173	0.3173	0.4849	0.2906	0.4501	0.3169	0.9052	0.2944	0.3486	1.5384	0.548	0.548	0.548	0.5014	0.4809	0.5105	0.0688	0.503	0.503	0.4347	0.5788	0.5685	0.4872	0.535	0.5144	1.2078	1.1949	1.1949	1.1949	0.4119	1.4501	0.5147	0.4119	0.4935	0.4935	0.6625	0.5509	0.5541	0.4409	1.2174
3thexddcoa[c][m]	-0.1492	0.3533	0.3169	0.3169	0.3169	0.3317	0.3313	0.3416	0.3317	0.3173	0.3173	0.4849	0.2906	0.4501	0.3169	0.9052	0.2944	0.3486	1.5384	0.548	0.548	0.548	0.5014	0.4809	0.5105	0.0688	0.503	0.503	0.4347	0.5788	0.5685	0.4872	0.535	0.5144	1.2078	1.1949	1.1949	1.1949	0.4119	1.4501	0.5147	0.4119	0.4935	0.4935	0.6625	0.5509	0.5541	0.4409	1.2174
3thexddcoacrn[c][e]	-0.1492	0.3533	0.3169	0.3169	0.3169	0.3317	0.3313	0.3416	0.3317	0.3173	0.3173	0.4849	0.2906	0.4501	0.3169	0.9052	0.2944	0.3486	1.5384	0.548	0.548	0.548	0.5014	0.4809	0.5105	0.0688	0.503	0.503	0.4347	0.5788	0.5685	0.4872	0.535	0.5144	1.2078	1.1949	1.1949	1.1949	0.4119	1.4501	0.5147	0.4119	0.4935	0.4935	0.6625	0.5509	0.5541	0.4409	1.2174
3ttetddcoa[c][m]	-0.1492	0.3533	0.3169	0.3169	0.3169	0.3317	0.3313	0.3416	0.3317	0.3173	0.3173	0.4849	0.2906	0.4501	0.3169	0.9052	0.2944	0.3486	1.5384	0.548	0.548	0.548	0.5014	0.4809	0.5105	0.0688	0.503	0.503	0.4347	0.5788	0.5685	0.4872	0.535	0.5144	1.2078	1.1949	1.1949	1.1949	0.4119	1.4501	0.5147	0.4119	0.4935	0.4935	0.6625	0.5509	0.5541	0.4409	1.2174
3ttetddcoacrn[c][e]	-0.1492	0.3533	0.3169	0.3169	0.3169	0.3317	0.3313	0.3416	0.3317	0.3173	0.3173	0.4849	0.2906	0.4501	0.3169	0.9052	0.2944	0.3486	1.5384	0.548	0.548	0.548	0.5014	0.4809	0.5105	0.0688	0.503	0.503	0.4347	0.5788	0.5685	0.4872	0.535	0.5144	1.2078	1.1949	1.1949	1.1949	0.4119	1.4501	0.5147	0.4119	0.4935	0.4935	0.6625	0.5509	0.5541	0.4409	1.2174
3ump[e]	-0.1492	0.3533	0.3169	0.3169	0.3169	0.3317	0.3313	0.3416	0.3317	0.3173	0.3173	0.4849	0.2906	0.4501	0.3169	0.9052	0.2944	0.3486	1.5384	0.548	0.548	0.548	0.5014	0.4809	0.5105	0.0688	0.503	0.503	0.4347	0.5788	0.5685	0.4872	0.535	0.5144	1.2078	1.1949	1.1949	1.1949	0.4119	1.4501	0.5147	0.4119	0.4935	0.4935	0.6625	0.5509	0.5541	0.4409	1.2174
42A3HP24DB[c]	-0.1489	0.3532	0.3167	0.3167	0.3167	0.3314	0.3314	0.3417	0.3314	0.3172	0.3172	0.4848	0.2907	0.45	0.3167	0.9053	0.2944	0.3485	1.5383	0.5474	0.5474	0.5474	0.5009	0.4808	0.51	0.0687	0.5026	0.5026	0.4346	0.5783	0.568	0.487	0.5345	0.5139	1.2076	1.1947	1.1947	1.1947	0.4117	1.4497	0.5144	0.4117	0.4932	0.4932	0.6622	0.5505	0.5536	0.4405	1.2169
44mctr[c][r]	29.926	0	0	0	0	0	0	0	0	0	0	0	0	0	0	0	0	0	0	0	0	0	0	0	0	0	0	0	0	0	0	0	0	0	0	0	0	0	0	0	0	0	0	0	0	0	0	0	0
44mzym[c][r]	29.926	0	0	0	0	0	0	0	0	0	0	0	0	0	0	0	0	0	0	0	0	0	0	0	0	0	0	0	0	0	0	0	0	0	0	0	0	0	0	0	0	0	0	0	0	0	0	0	0
4aabutn[c][e]	-0.1492	0.3533	0.3169	0.3169	0.3169	0.3317	0.3313	0.3416	0.3317	0.3173	0.3173	0.4849	0.2906	0.4501	0.3169	0.9052	0.2944	0.3486	1.5385	0.548	0.548	0.548	0.5014	0.4809	0.5105	0.0683	0.503	0.503	0.4347	0.5788	0.5685	0.4872	0.535	0.5144	1.208	1.1951	1.1951	1.1951	0.4119	1.4502	0.5147	0.4119	0.4935	0.4935	0.6625	0.5509	0.5541	0.4409	1.2174
4abut[c][e][l][m]	-0.1465	0.3538	0.3177	0.3176	0.3177	0.3324	0.3323	0.3425	0.3325	0.3179	0.3179	0.4854	0.2916	0.4508	0.3178	0.9059	0.2954	0.3498	1.5394	0.5507	0.5507	0.5507	0.504	0.4816	0.5131	0.0654	0.5058	0.5058	0.4351	0.581	0.5708	0.4882	0.5377	0.5171	1.2124	1.1997	1.1997	1.1997	0.4165	1.4547	0.5193	0.4165	0.4982	0.4982	0.6666	0.5552	0.558	0.4455	1.2221
4abutn[c][e]	-0.1492	0.3533	0.3169	0.3169	0.3169	0.3317	0.3313	0.3416	0.3317	0.3173	0.3173	0.4849	0.2906	0.4501	0.3169	0.9052	0.2944	0.3486	1.5385	0.548	0.548	0.548	0.5014	0.4809	0.5105	0.0683	0.503	0.503	0.4347	0.5788	0.5685	0.4872	0.535	0.5144	1.2078	1.1951	1.1951	1.1951	0.4119	1.4501	0.5147	0.4119	0.4935	0.4935	0.6625	0.5509	0.5541	0.4409	1.2174
4aphdob[c]	-0.1487	0.3531	0.3172	0.3167	0.3172	0.3317	0.3317	0.342	0.3317	0.3172	0.3172	0.4851	0.291	0.4502	0.3172	0.9053	0.2947	0.3487	1.5386	0.5478	0.5478	0.5478	0.5012	0.481	0.5104	8.5483	0.5028	0.5028	0.4348	0.5789	0.5686	0.4871	0.5349	0.5144	1.2079	1.1951	1.1951	1.1951	0.4119	1.45	0.5144	0.4119	0.4936	0.4936	0.6623	0.5509	0.554	0.4406	1.2172
4h2oglt[m]	-16.4126	-15.9101	-15.9464	-15.9464	-15.9464	-15.9316	-15.9316	-15.921	-15.9312	-15.946	-15.946	-15.7798	-15.9723	-15.8147	-15.946	-15.3594	-15.9685	-15.9151	-14.7363	-3.3735	-3.3735	-3.3735	-3.3735	-5.2193	-3.3735	-16.1957	-3.3735	-3.3735	-15.8297	-3.3735	-3.3735	-15.7848	-3.3735	-3.3735	-4.148	-4.148	-4.148	-4.148	-4.148	-4.148	-4.148	-4.148	-4.148	-4.148	-4.148	-4.148	-4.148	-4.148	-4.148
4hatvacid[c][e]	0.419	0.1221	0.1228	0.1228	0.1228	0.1228	0.1228	0.1228	0.1228	0.1228	0.1228	0.1228	0.1228	0.1228	0.1228	0.1228	0.1228	0.1228	1.3991	0.497	0.497	0.497	0.497	0.5758	0.497	0.004	0.497	0.497	0.9984	0.497	0.497	1.2807	0.497	0.497	0.4723	0.4725	0.4725	0.4725	0.4725	0.4725	0.4725	0.4725	0.4725	0.4725	0.4725	0.4725	0.4725	0.4725	0.4725
4hatvlac[c][e]	0.419	0.1221	0.1228	0.1228	0.1228	0.1228	0.1228	0.1228	0.1228	0.1228	0.1228	0.1228	0.1228	0.1228	0.1228	0.1228	0.1228	0.1228	1.3991	0.497	0.497	0.497	0.497	0.5758	0.497	0.004	0.497	0.497	0.9984	0.497	0.497	1.2807	0.497	0.497	0.4723	0.4725	0.4725	0.4725	0.4725	0.4725	0.4725	0.4725	0.4725	0.4725	0.4725	0.4725	0.4725	0.4725	0.4725
4hexdtricoa[m][x]	0	0	0	0	0	0	0	0	0	0	0	0	0	0	0	0	0	0	0	0	0	0	0	0	0	0	0	0	0	0	0	0	0	0	0	0	0	0	0	0	0	0	0	0	0	0	0	0	0
4hpro_LT[c][e][m]	-2.812	-3.2034	-3.2024	-3.2024	-3.2024	-3.2024	-3.2024	-3.2024	-3.2024	-3.2024	-3.2024	-3.2024	-3.2024	-3.2024	-3.2024	-3.2023	-3.2024	-3.2024	-3.6919	-2.6147	-2.6147	-2.6147	-2.6147	-3.3546	-2.6147	-2.3407	-2.6147	-2.6147	-3.6662	-2.6147	-2.6147	-3.7191	-2.6147	-2.6147	-3.1211	-3.1214	-3.1214	-3.1214	-3.1214	-3.1214	-3.1214	-3.1214	-3.1214	-3.1214	-3.1214	-3.1214	-3.1214	-3.1214	-3.1214
4mop[c][e][m]	-0.1491	0.3534	0.3171	0.3171	0.3171	0.3316	0.3316	0.3419	0.3319	0.3174	0.3174	0.4851	0.2909	0.4502	0.3171	0.9054	0.2947	0.3488	1.5386	0.5483	0.5483	0.5483	0.5015	0.4811	0.5104	0.0685	0.5033	0.5033	0.435	0.579	0.5688	0.4875	0.5353	0.5147	1.2082	1.1953	1.1953	1.1953	0.4123	1.4504	0.515	0.4123	0.4939	0.4939	0.6629	0.5512	0.5543	0.4411	1.2176
4mptnl[c][e][m]	-0.1492	0.3533	0.3169	0.3169	0.3169	0.3317	0.3313	0.3416	0.3317	0.3173	0.3173	0.4849	0.2906	0.4501	0.3169	0.9052	0.2944	0.3486	1.5384	0.548	0.548	0.548	0.5014	0.4809	0.5105	0.0688	0.503	0.503	0.4347	0.5788	0.5685	0.4872	0.535	0.5144	1.2078	1.1949	1.1949	1.1949	0.4119	1.4501	0.5147	0.4119	0.4935	0.4935	0.6625	0.5509	0.5541	0.4409	1.2174
4mzym_int1[c][r]	29.926	0	0	0	0	0	0	0	0	0	0	0	0	0	0	0	0	0	0	0	0	0	0	0	0	0	0	0	0	0	0	0	0	0	0	0	0	0	0	0	0	0	0	0	0	0	0	0	0
4mzym_int2[c][r]	4.0729	0.3533	0.3169	0.3169	0.3169	0.3315	0.3313	0.3416	0.3317	0.3173	0.3173	0.4849	0.2906	0.4501	0.3169	0.9052	0.2944	0.3486	1.5384	0.548	0.548	0.548	0.5014	0.4809	0.5105	0.0683	0.503	0.503	0.4347	0.5788	0.5685	0.4872	0.535	0.5144	1.2078	1.1949	1.1949	1.1949	0.4119	1.4501	0.5147	0.4119	0.4935	0.4935	0.6625	0.5509	0.5541	0.4409	1.2174
4tmeabutn[c][e]	1.035	1.0109	1.0149	1.0149	1.0149	1.0149	1.0149	1.0149	1.0149	1.0149	1.0149	1.0149	1.0149	1.0149	1.0149	1.0149	1.0149	1.0149	-0.3874	-1.6988	-1.6988	-1.6988	-1.6988	-1.4754	-1.6988	1.158	-1.6988	-1.6988	-1.0448	-1.6988	-1.6988	-0.4269	-1.6988	-1.6988	-2.9811	-2.9892	-2.9892	-2.9892	-2.9892	-2.9892	-2.9892	-2.9892	-2.9892	-2.9892	-2.9892	-2.9892	-2.9892	-2.9892	-2.9892
56dthm[c][e]	0.0426	0	0	0	0	0	0	0	0	0	0	0	0	0	0	0	0	0	0.0987	0	0	0	0	0	0	0.0878	0	0	0	0	0	0.0305	0	0	0	0	0	0	0	0	0	0	0	0	0	0	0	0	0
5adtststerone[c][e][r]	-0.1492	0.3533	0.3169	0.3169	0.3169	0.3317	0.3313	0.3418	0.3317	0.3173	0.3173	0.4849	0.2906	0.4501	0.3169	0.9052	0.2944	0.3486	1.5384	0.548	0.548	0.548	0.5012	0.4809	0.5102	0.0683	0.503	0.503	0.4347	0.5788	0.5685	0.4872	0.535	0.5144	1.2079	1.1951	1.1951	1.1951	0.4119	1.4501	0.5147	0.4119	0.4935	0.4935	0.6625	0.5509	0.5541	0.4409	1.2174
5aizc[c]	-0.1492	0.3529	0.3169	0.3169	0.3169	0.3313	0.3313	0.3416	0.3317	0.3173	0.3173	0.4849	0.2906	0.4501	0.3169	0.9052	0.2944	0.3486	1.5384	0.548	0.548	0.548	0.501	0.4809	0.5102	0.0683	0.503	0.503	0.4347	0.5788	0.5685	0.4872	0.535	0.5144	1.2078	1.1949	1.1949	1.1949	0.4119	1.4499	0.5147	0.4119	0.4935	0.4935	0.6625	0.5509	0.5541	0.4409	1.2172
5aop[c][e][m]	1.2063	0.7585	0.7619	0.7619	0.7619	0.7619	0.7619	0.7619	0.7619	0.7619	0.7619	0.7619	0.7619	0.7619	0.7619	0.762	0.7619	0.7619	0.6603	-0.7373	-0.7373	-0.7373	-0.7373	-0.5711	-0.7373	0.9173	-0.7373	-0.7373	0.2266	-0.7373	-0.7373	0.5061	-0.7373	-0.7373	-0.6717	-0.6706	-0.6706	-0.6706	-0.671	-0.6704	-0.671	-0.671	-0.671	-0.671	-0.6709	-0.671	-0.671	-0.671	-0.6706
5dpmev[c][x]	32.511	0	0	0	0	0	0	0	0	0	0	0	0	0	0	0	0	0	0	0	0	0	0	0	0	0	0	0	0	0	0	0	0	0	0	0	0	0	0	0	0	0	0	0	0	0	0	0	0
5fthf[c][e][m]	-13.6565	-13.154	-13.1903	-13.1903	-13.1903	-13.1759	-13.1759	-13.1656	-13.1755	-13.19	-13.19	-13.0224	-13.2166	-13.0572	-13.1903	-12.602	-13.2128	-13.1587	-11.9689	-12.9592	-12.9592	-12.9592	-13.0059	-13.0263	-12.9971	-13.4389	-13.0043	-13.0043	-13.0726	-12.9285	-12.9388	-13.02	-12.9723	-12.9929	-12.2994	-12.3123	-12.3123	-12.3123	-13.0954	-12.0572	-12.9925	-13.0954	-13.0138	-13.0138	-12.8447	-12.9564	-12.9532	-13.0664	-12.29
5hoxindact[c]	-0.1492	0.3531	0.3167	0.3167	0.3167	0.3313	0.3313	0.3414	0.3315	0.3171	0.3171	0.4847	0.2905	0.4499	0.3167	0.9051	0.2942	0.3486	1.5384	0.5479	0.5479	0.5479	0.5012	0.4808	0.5103	12.2786	0.5028	0.5028	0.4347	0.5786	0.5685	0.487	0.5348	0.5142	1.2077	1.1949	1.1949	1.1949	0.4119	1.45	0.5146	0.4119	0.4933	0.4933	0.6624	0.5507	0.5539	0.4407	1.2173
5hoxindoa[c][e]	-0.1492	0.3532	0.3168	0.3168	0.3168	0.3313	0.3313	0.3415	0.3316	0.3172	0.3172	0.4848	0.2905	0.4499	0.3168	0.9051	0.2943	0.3486	1.5384	0.5479	0.5479	0.5479	0.501	0.4808	0.5102	11.6938	0.5029	0.5029	0.4347	0.5787	0.5685	0.4871	0.5349	0.5143	1.2078	1.1949	1.1949	1.1949	0.4119	1.45	0.5146	0.4119	0.4934	0.4934	0.6624	0.5508	0.554	0.4408	1.2172
5HPET[c][m]	-0.1492	0.3533	0.3169	0.3169	0.3169	0.3313	0.3313	0.3416	0.3317	0.3173	0.3173	0.4849	0.2906	0.4501	0.3169	0.9052	0.2944	0.3486	1.5384	0.548	0.548	0.548	0.5014	0.4809	0.5105	0.0688	0.503	0.503	0.4347	0.5788	0.5685	0.4872	0.535	0.5144	1.2078	1.1949	1.1949	1.1949	0.4119	1.4501	0.5147	0.4119	0.4935	0.4935	0.6625	0.5509	0.5541	0.4409	1.2172
5mdr1p[c]	-0.1492	0.3533	0.3169	0.3169	0.3169	0.3313	0.3313	0.3416	0.3317	0.3173	0.3173	0.4849	0.2906	0.4501	0.3169	0.9052	0.2944	0.3486	1.538	0.5477	0.5477	0.5477	0.501	0.4806	0.5102	0.0683	0.5027	0.5027	0.4347	0.5785	0.5682	0.4869	0.5347	0.5141	1.2078	1.1951	1.1951	1.1951	0.4119	1.4501	0.5147	0.4119	0.4935	0.4935	0.6625	0.5509	0.5541	0.4409	1.2174
5mdru1p[c]	-0.1492	0.3533	0.3169	0.3169	0.3169	0.3313	0.3313	0.3416	0.3317	0.3173	0.3173	0.4849	0.2906	0.4501	0.3169	0.9052	0.2944	0.3486	1.538	0.5477	0.5477	0.5477	0.501	0.4806	0.5102	0.0683	0.5027	0.5027	0.4347	0.5785	0.5682	0.4869	0.5347	0.5141	1.2078	1.1951	1.1951	1.1951	0.4119	1.4501	0.5147	0.4119	0.4935	0.4935	0.6625	0.5509	0.5541	0.4409	1.2174
5mta[c][e]	-0.1492	0.3533	0.3169	0.3169	0.3169	0.3313	0.3313	0.3416	0.3317	0.3173	0.3173	0.4849	0.2906	0.4501	0.3169	0.9052	0.2944	0.3486	1.5384	0.548	0.548	0.548	0.5014	0.4809	0.5105	0.0688	0.503	0.503	0.4347	0.5788	0.5685	0.4872	0.535	0.5144	1.2078	1.1949	1.1949	1.1949	0.4119	1.4501	0.5147	0.4119	0.4935	0.4935	0.6625	0.5509	0.5541	0.4409	1.2174
5mthf[c][e]	0.7998	0.6627	0.6631	0.6631	0.6631	0.6631	0.6631	0.6631	0.6631	0.6631	0.6631	0.6631	0.6631	0.6631	0.6631	0.6631	0.6631	0.6631	1.944	0.614	0.614	0.614	0.614	0.7603	0.614	1.0059	0.614	0.614	1.4665	0.614	0.614	1.808	0.614	0.614	0.4988	0.4989	0.4989	0.4989	0.4989	0.4989	0.4989	0.4989	0.4989	0.4989	0.4989	0.4989	0.4989	0.4989	0.4989
5pmev[c][x]	32.511	0	0	0	0	0	0	0	0	0	0	0	0	0	0	0	0	0	0	0	0	0	0	0	0	0	0	0	0	0	0	0	0	0	0	0	0	0	0	0	0	0	0	0	0	0	0	0	0
6epvs[c][e]	0.419	0.1221	0.1228	0.1228	0.1228	0.1228	0.1228	0.1228	0.1228	0.1228	0.1228	0.1228	0.1228	0.1228	0.1228	0.1228	0.1228	0.1228	1.3991	0.497	0.497	0.497	0.497	0.5758	0.497	0.004	0.497	0.497	0.9984	0.497	0.497	1.2807	0.497	0.497	0.4723	0.4725	0.4725	0.4725	0.4725	0.4725	0.4725	0.4725	0.4725	0.4725	0.4725	0.4725	0.4725	0.4725	0.4725
6pgc[c][r]	-0.1492	0.3533	0.3169	0.3169	0.3169	0.3317	0.3317	0.342	0.3317	0.3173	0.3173	0.4849	0.291	0.4501	0.3169	0.9052	0.2948	0.3493	17.2608	13.8908	13.8908	13.8908	13.8908	14.8001	13.8908	0.0688	13.8908	13.8908	16.5302	13.8908	13.8908	17.0818	13.8908	13.8908	1.208	1.1951	1.1951	1.1951	0.4119	1.4502	0.5147	0.4119	0.4935	0.4935	0.6622	0.5509	0.5541	0.4409	1.2174
6pgl[c][r]	1.1731	0.0929	0.1014	0.1014	0.1014	0.1014	0.1014	0.1014	0.1014	0.1014	0.1014	0.1018	0.1013	0.1017	0.1014	0.1032	0.1013	0.1014	8.7385	5.3794	5.3794	5.3794	5.3794	6.2686	5.3794	-1.6042	5.3794	5.3794	8.0044	5.3794	5.3794	8.5592	5.3794	5.3794	0.979	0.9825	0.9825	0.9825	0.9809	0.9832	0.9811	0.9809	0.981	0.981	0.9813	0.9811	0.9811	0.981	0.9825
7dhcdchol[c][e]	-0.1488	0.353	0.3166	0.3166	0.3166	0.3314	0.3314	0.3417	0.3314	0.317	0.317	0.4847	0.2907	0.4502	0.317	0.9052	0.2945	0.3487	1.5385	0.5479	0.5479	0.5479	0.5012	0.4807	0.5103	0.0688	0.5028	0.5028	0.4348	0.5786	0.5687	0.4873	0.5348	0.5142	1.2077	1.1948	1.1948	1.1948	0.4117	1.4498	0.5145	0.4117	0.4933	0.4933	0.6624	0.5507	0.5536	0.4406	1.2171
7dhchol[c][e]	-0.1488	0.353	0.3166	0.3166	0.3166	0.3314	0.3314	0.3417	0.3314	0.317	0.317	0.4847	0.2907	0.4502	0.317	0.9052	0.2945	0.3487	1.5385	0.5479	0.5479	0.5479	0.5012	0.4807	0.5103	0.0688	0.5028	0.5028	0.4348	0.5786	0.5687	0.4873	0.5348	0.5142	1.2077	1.1948	1.1948	1.1948	0.4117	1.4498	0.5145	0.4117	0.4933	0.4933	0.6624	0.5507	0.5536	0.4406	1.2171
7dhchsterol[c][e][r]	4.0729	0.3533	0.3169	0.3169	0.3169	0.3313	0.3313	0.3416	0.3317	0.3173	0.3173	0.4849	0.2906	0.4501	0.3169	0.9052	0.2944	0.3486	1.5384	0.548	0.548	0.548	0.5014	0.4809	0.5103	0.0688	0.503	0.503	0.4347	0.5788	0.5685	0.4872	0.535	0.5144	1.2078	1.1949	1.1949	1.1949	0.4119	1.4501	0.5147	0.4119	0.4935	0.4935	0.6625	0.5509	0.5541	0.4409	1.2174
aacoa[c][m][x]	-7.8963	-13.1828	-13.2191	-13.2192	-13.2191	-13.2045	-13.2046	-13.1943	-13.2044	-13.2188	-13.2188	-13.0516	-13.2453	-13.0862	-13.2191	-12.6313	-13.2415	-13.1871	-11.9962	-12.9871	-12.9871	-12.9871	-13.0339	-13.0543	-13.0247	-13.467	-13.0321	-13.0321	-13.1002	-12.9563	-12.9665	-13.0477	-13.0001	-13.0207	-12.3279	-12.3408	-12.3408	-12.3408	-13.1239	-12.0856	-13.021	-13.1239	-13.0423	-13.0423	-12.8737	-12.9849	-12.9817	-13.095	-12.3185
aact[c][e][m]	-15.4491	-14.9718	-15.0087	-15.0087	-15.0087	-14.9938	-14.9938	-14.9828	-14.9938	-15.0087	-15.0087	-14.8457	-15.0343	-14.8777	-15.0091	-14.4242	-15.0309	-14.9758	-0.8163	-14.8311	-14.8311	-14.8311	-14.8781	-14.9193	-14.8662	-15.2514	-14.876	-14.876	-2.7507	-14.7926	-14.8055	-0.775	-14.8457	-14.8655	-14.2549	-14.2714	-14.2714	-14.2714	-15.0562	-14.0173	-14.9559	-15.0562	-14.9747	-14.9747	-14.8407	-14.9025	-14.8925	-15.0271	-14.2499
abt[c][e]	-0.1492	0.3533	0.3169	0.3169	0.3169	0.3317	0.3313	0.3416	0.3317	0.3173	0.3173	0.4849	0.2906	0.4501	0.3169	0.9052	0.2944	0.3486	1.5384	0.548	0.548	0.548	0.5014	0.4809	0.5105	0.0688	0.503	0.503	0.4347	0.5788	0.5685	0.4872	0.535	0.5144	1.2078	1.1949	1.1949	1.1949	0.4119	1.4501	0.5147	0.4119	0.4935	0.4935	0.6625	0.5509	0.5541	0.4409	1.2174
abt_D[c][e]	1.2064	0.7586	0.7619	0.7619	0.7619	0.7619	0.7619	0.7619	0.7619	0.7619	0.7619	0.7619	0.7619	0.7619	0.7619	0.762	0.7619	0.7619	0.6601	-0.7376	-0.7376	-0.7376	-0.7376	-0.5713	-0.7376	0.9174	-0.7376	-0.7376	0.2266	-0.7376	-0.7376	0.5061	-0.7376	-0.7376	-0.6722	-0.6711	-0.6711	-0.6711	-0.6712	-0.671	-0.6712	-0.6712	-0.6712	-0.6712	-0.6712	-0.6712	-0.6712	-0.6712	-0.6711
ac[c][e][g][m][x]	-1.3914	-1.726	-1.7285	-1.7285	-1.7285	-1.7285	-1.7285	-1.7285	-1.7285	-1.7285	-1.7285	-1.7285	-1.7285	-1.7285	-1.7285	-1.7284	-1.7285	-1.7285	-3.3239	-1.9573	-1.9573	-1.9573	-1.9573	-2.1579	-1.9573	-1.2689	-1.9573	-1.9573	-3.6085	-1.9573	-1.9573	-3.4033	-1.9573	-1.9573	-2.8767	-2.8767	-2.8767	-2.8767	-2.8769	-2.8767	-2.8769	-2.8769	-2.8769	-2.8769	-2.8769	-2.8769	-2.8769	-2.8769	-2.8767
acac[c][e][m][x]	-0.2691	-0.9747	-0.9737	-0.9737	-0.9737	-0.9737	-0.9737	-0.9737	-0.9737	-0.9737	-0.9737	-0.9737	-0.9737	-0.9737	-0.9737	-0.9735	-0.9737	-0.9737	-1.8637	-2.4936	-2.4936	-2.4936	-2.4936	-2.4347	-2.4936	-0.707	-2.4936	-2.4936	-2.1586	-2.4935	-2.4935	-1.9429	-2.4936	-2.4936	-2.5865	-2.5867	-2.5867	-2.5867	-2.5874	-2.5863	-2.5873	-2.5874	-2.5873	-2.5873	-2.5872	-2.5873	-2.5873	-2.5874	-2.5866
acald[c][e][m][x]	-0.0914	-0.0881	-0.0881	-0.0881	-0.0881	-0.0881	-0.0881	-0.0881	-0.0881	-0.0881	-0.0881	-0.0881	-0.0881	-0.0881	-0.0881	-0.0881	-0.0881	-0.0881	3.5392	2.0509	2.0509	2.0509	2.0509	2.2508	2.0509	0.5338	2.0509	2.0509	3.0752	2.0509	2.0509	3.4036	2.0509	2.0509	1.2097	1.2096	1.2096	1.2096	1.2096	1.2096	1.2096	1.2096	1.2096	1.2096	1.2096	1.2096	1.2096	1.2096	1.2096
accoa[c][g][m][r][x]	-5.8595	-6.3229	-5.9989	-5.9989	-5.9989	-5.9987	-5.9987	-5.9986	-5.9987	-5.9989	-5.9989	-5.9966	-5.9993	-5.9971	-5.9989	-5.9895	-5.9992	-5.9985	-3.2376	-4.2441	-4.2441	-4.2441	-4.2443	-4.4529	-4.2442	-5.6039	-4.2443	-4.2443	-3.061	-4.2439	-4.244	-3.1325	-4.2441	-4.2442	-4.0465	-4.0204	-4.0204	-4.0204	-4.024	-4.0187	-4.0236	-4.024	-4.0237	-4.0237	-4.0231	-4.0235	-4.0235	-4.0239	-4.0202
acetol[c]	0	0	0	0	0	0	0	0	0	0	0	0	0	0	0	0	0	0	0	0	0	0	0	0	0	0	0	0	0	0	0	0	0	0	0	0	0	0	0	0	0	0	0	0	0	0	0	0	0
acetone[c][e][m]	-14.9967	-14.482	-14.5192	-14.5196	-14.5192	-14.504	-14.5044	-14.4926	-14.504	-14.5192	-14.5192	-14.3602	-14.5451	-14.393	-14.5196	-13.9387	-14.5413	-14.4893	-13.2934	-14.2928	-14.2928	-14.2928	-14.34	-14.3499	-14.3321	-14.7705	-14.338	-14.338	-14.3961	-14.2647	-14.2744	-14.3446	-14.3059	-14.3266	-13.6281	-13.6414	-13.6414	-13.6414	-14.4254	-13.387	-14.323	-14.4254	-14.344	-14.344	-14.1672	-14.2896	-14.288	-14.3964	-13.6193
acgagbside_hs[c][g][l]	-0.1492	0.3533	0.3169	0.3169	0.3169	0.3313	0.3313	0.3416	0.3317	0.3173	0.3173	0.4849	0.2906	0.4501	0.3169	0.9052	0.2944	0.3486	1.5384	0.548	0.548	0.548	0.5014	0.4809	0.5105	0.0688	0.503	0.503	0.4347	0.5788	0.5685	0.4872	0.535	0.5144	1.2078	1.1949	1.1949	1.1949	0.4119	1.4501	0.5147	0.4119	0.4935	0.4935	0.6625	0.5509	0.5541	0.4409	1.2174
acgal[c][e][g][l]	-0.1492	0.3533	0.3169	0.3169	0.3169	0.3317	0.3313	0.3416	0.3317	0.3173	0.3173	0.4849	0.2906	0.4501	0.3169	0.9052	0.2944	0.3486	1.5384	0.548	0.548	0.548	0.501	0.4806	0.5102	0.0683	0.503	0.503	0.4347	0.5788	0.5685	0.4872	0.535	0.5144	1.208	1.1951	1.1951	1.1951	0.4123	1.4502	0.5147	0.4123	0.4938	0.4938	0.6625	0.5509	0.5541	0.4409	1.2176
acgalfucgalacgalfuc12gal14acglcgalgluside_hs[c][e][g]	-0.1492	0.3533	0.3169	0.3169	0.3169	0.3317	0.3313	0.3416	0.3317	0.3173	0.3173	0.4849	0.2906	0.4501	0.3169	0.9052	0.2944	0.3486	1.5384	0.548	0.548	0.548	0.5014	0.4809	0.5105	0.0688	0.503	0.503	0.4347	0.5788	0.5685	0.4872	0.535	0.5144	1.2078	1.1949	1.1949	1.1949	0.4119	1.4501	0.5147	0.4119	0.4935	0.4935	0.6625	0.5509	0.5541	0.4409	1.2174
acgalfucgalacgalfucgalacglcgal14acglcgalgluside_hs[c][e][g]	-0.1492	0.3533	0.3169	0.3169	0.3169	0.3317	0.3313	0.3416	0.3317	0.3173	0.3173	0.4849	0.2906	0.4501	0.3169	0.9052	0.2944	0.3486	1.5384	0.548	0.548	0.548	0.5014	0.4809	0.5105	0.0688	0.503	0.503	0.4347	0.5788	0.5685	0.4872	0.535	0.5144	1.2078	1.1949	1.1949	1.1949	0.4119	1.4501	0.5147	0.4119	0.4935	0.4935	0.6625	0.5509	0.5541	0.4409	1.2174
acgam[c][l]	-24.8661	0.406	0.3696	0.3696	0.3696	0.3849	0.3845	0.3942	0.3852	0.3718	0.3718	0.5028	0.339	0.4786	0.3715	0.9225	0.3446	0.3751	1.5639	0.5742	0.5742	0.5742	0.5272	0.5041	0.5363	0.0861	0.5288	0.5288	0.4602	0.6046	0.5947	0.5114	0.5609	0.5402	1.2376	1.225	1.225	1.225	0.4419	1.4801	0.5448	0.4419	0.5236	0.5236	0.691	0.5815	0.5846	0.4711	1.2476
acgam1p[c]	-0.1492	0.3522	0.3158	0.3158	0.3158	0.3306	0.3306	0.3409	0.3306	0.3162	0.3162	0.4836	0.2899	0.4501	0.3158	0.9047	0.2937	0.3486	1.5377	0.5468	0.5468	0.5468	0.5	0.4809	0.5092	0.0688	0.5017	0.5017	0.4344	0.5775	0.5676	0.4862	0.5337	0.5131	1.2052	1.1925	1.1925	1.1925	0.4095	1.4478	0.5121	0.4095	0.4912	0.4912	0.6616	0.5503	0.5537	0.4385	1.2154
acgam6p[c]	-0.1492	0.3522	0.3158	0.3158	0.3158	0.3306	0.3306	0.3409	0.3306	0.3162	0.3162	0.4836	0.2899	0.4501	0.3158	0.9047	0.2937	0.3486	1.5377	0.5468	0.5468	0.5468	0.5	0.4809	0.5092	0.0688	0.5017	0.5017	0.4344	0.5775	0.5676	0.4862	0.5337	0.5131	1.2052	1.1925	1.1925	1.1925	0.4095	1.4478	0.5121	0.4095	0.4912	0.4912	0.6616	0.5503	0.5537	0.4385	1.2154
acgbgbside_hs[c][g][l]	-0.1492	0.3533	0.3169	0.3169	0.3169	0.3317	0.3313	0.3416	0.3317	0.3173	0.3173	0.4849	0.2906	0.4501	0.3169	0.9052	0.2944	0.3486	1.5384	0.548	0.548	0.548	0.501	0.4806	0.5102	0.0683	0.503	0.503	0.4347	0.5788	0.5685	0.4872	0.535	0.5144	1.208	1.1951	1.1951	1.1951	0.4123	1.4502	0.5147	0.4123	0.4938	0.4938	0.6625	0.5509	0.5541	0.4409	1.2176
aclys[c][m]	-0.1487	0.3533	0.3173	0.3169	0.3173	0.3317	0.3317	0.342	0.3321	0.3173	0.3173	0.4849	0.291	0.4504	0.3173	0.9055	0.2948	0.3489	1.5385	0.548	0.548	0.548	0.5014	0.4809	0.5105	0.0688	0.5033	0.5033	0.4347	0.5788	0.5688	0.4872	0.535	0.5144	1.2082	1.1953	1.1953	1.1953	0.4123	1.4504	0.515	0.4123	0.4938	0.4938	0.6628	0.5512	0.5544	0.4412	1.2176
acmana[c][e][r]	-1.1233	0.406	0.3694	0.3694	0.3694	0.3848	0.3843	0.394	0.385	0.3716	0.3716	0.5029	0.3388	0.4785	0.3712	0.9224	0.3443	0.3749	1.5638	0.5742	0.5742	0.5742	0.5271	0.5039	0.5363	0.0858	0.5288	0.5288	0.4601	0.6046	0.5944	0.5113	0.5608	0.5402	1.2378	1.2251	1.2251	1.2251	0.442	1.4803	0.5449	0.442	0.5237	0.5237	0.691	0.5816	0.5847	0.4712	1.2477
acmp[c][e][r]	-0.1492	0.3533	0.3169	0.3169	0.3169	0.3313	0.3313	0.3416	0.3317	0.3173	0.3173	0.4849	0.2906	0.4501	0.3169	0.9052	0.2944	0.3486	1.5384	0.548	0.548	0.548	0.5014	0.4809	0.5103	0.0688	0.503	0.503	0.4347	0.5788	0.5685	0.4872	0.535	0.5144	1.2078	1.1949	1.1949	1.1949	0.4119	1.4501	0.5147	0.4119	0.4935	0.4935	0.6625	0.5509	0.5541	0.4409	1.2172
acmpglu[c][e][r]	-0.1492	0.3533	0.3169	0.3169	0.3169	0.3313	0.3313	0.3416	0.3317	0.3173	0.3173	0.4849	0.2906	0.4501	0.3169	0.9052	0.2944	0.3486	1.5384	0.548	0.548	0.548	0.5014	0.4809	0.5105	0.0688	0.503	0.503	0.4347	0.5788	0.5685	0.4872	0.535	0.5144	1.2078	1.1949	1.1949	1.1949	0.4119	1.4501	0.5147	0.4119	0.4935	0.4935	0.6625	0.5509	0.5541	0.4409	1.2174
acmpglut[c][e]	-0.1492	0.3533	0.3169	0.3169	0.3169	0.3317	0.3313	0.3416	0.3317	0.3173	0.3173	0.4849	0.2906	0.4501	0.3169	0.9052	0.2944	0.3486	1.5384	0.548	0.548	0.548	0.5014	0.4809	0.5105	0.0688	0.503	0.503	0.4347	0.5788	0.5685	0.4872	0.535	0.5144	1.2078	1.1949	1.1949	1.1949	0.4119	1.4501	0.5147	0.4119	0.4935	0.4935	0.6625	0.5509	0.5541	0.4409	1.2174
acnam[c][e][l][n]	-0.1407	0.3706	0.3341	0.3341	0.3341	0.3492	0.3489	0.359	0.3492	0.3351	0.3351	0.4904	0.3066	0.4592	0.3349	0.9105	0.311	0.3572	1.547	0.5569	0.5569	0.5569	0.5101	0.4884	0.5192	0.074	0.5117	0.5117	0.4433	0.5875	0.5772	0.4954	0.5437	0.5231	1.2182	1.2054	1.2054	1.2054	0.4224	1.4605	0.525	0.4224	0.504	0.504	0.6723	0.5615	0.5645	0.4512	1.2278
acngalacglcgal14acglcgalgluside_hs[c][e][g]	-0.1492	0.3533	0.3169	0.3169	0.3169	0.3313	0.3313	0.3416	0.3317	0.3173	0.3173	0.4849	0.2906	0.4501	0.3169	0.9052	0.2944	0.3486	1.5384	0.548	0.548	0.548	0.5014	0.4809	0.5105	0.0688	0.503	0.503	0.4347	0.5788	0.5685	0.4872	0.535	0.5144	1.2078	1.1949	1.1949	1.1949	0.4119	1.4501	0.5147	0.4119	0.4935	0.4935	0.6625	0.5509	0.5541	0.4409	1.2174
acorn[c][e]	-0.1492	0.3533	0.3169	0.3169	0.3169	0.3313	0.3313	0.3416	0.3317	0.3173	0.3173	0.4849	0.2906	0.4501	0.3169	0.9052	0.2944	0.3486	1.5384	0.548	0.548	0.548	0.5014	0.4809	0.5102	0.0683	0.503	0.503	0.4347	0.5788	0.5685	0.4872	0.535	0.5144	1.2078	1.1949	1.1949	1.1949	0.4119	1.4501	0.5147	0.4119	0.4935	0.4935	0.6625	0.5509	0.5541	0.4409	1.2172
acrn[c][e][m][r][x]	1.3308	0.4768	0.528	0.528	0.528	0.5281	0.5281	0.5281	0.5281	0.528	0.528	0.5281	0.528	0.5281	0.528	0.5281	0.528	0.5281	1.9261	0.5858	0.5858	0.5858	0.5857	0.7614	0.5858	0.7689	0.5858	0.5858	1.4831	0.5858	0.5858	1.8264	0.5858	0.5858	0.439	0.4569	0.4569	0.4569	0.4568	0.457	0.4569	0.4568	0.4568	0.4568	0.4569	0.4569	0.4569	0.4568	0.4569
ade[c][e]	-0.1459	0.3563	0.32	0.32	0.32	0.3346	0.3345	0.3449	0.3347	0.3202	0.3202	0.4842	0.2939	0.4526	0.3199	0.9065	0.2976	0.3489	1.5425	0.5516	0.5516	0.5516	0.5048	0.4848	0.5137	0.0724	0.5065	0.5065	0.4386	0.5823	0.5719	0.4911	0.5384	0.5178	1.2088	1.1963	1.1963	1.1963	0.4135	1.4517	0.5162	0.4135	0.4952	0.4952	0.6645	0.5544	0.5571	0.4427	1.2195
adn[c][e][l][m]	-11.3352	-10.8331	-10.8693	-10.8694	-10.8693	-10.8547	-10.8547	-10.8444	-10.8546	-10.869	-10.869	-10.7023	-10.8954	-10.7364	-10.8692	-10.2814	-10.8916	-10.8379	-9.6475	-10.6378	-10.6378	-10.6378	-10.6846	-10.7051	-10.6756	-11.1176	-10.6829	-10.6829	-10.7512	-10.6071	-10.6174	-10.6988	-10.651	-10.6715	-9.9779	-9.9907	-9.9907	-9.9907	-10.7737	-9.7357	-10.6711	-10.7737	-10.6923	-10.6923	-10.5237	-10.635	-10.6318	-10.7448	-9.9683
adp[c][e][g][m][n][r][x]	-0.2781	-0.3845	-0.3846	-0.3846	-0.3846	-0.3846	-0.3846	-0.3846	-0.3846	-0.3846	-0.3846	-0.3846	-0.3846	-0.3846	-0.3846	-0.3846	-0.3846	-0.3846	0.4019	-0.0348	-0.0348	-0.0348	-0.0348	-0.0045	-0.0348	-0.3933	-0.0348	-0.0348	0.1936	-0.0348	-0.0348	0.3296	-0.0348	-0.0348	-0.1519	-0.1519	-0.1519	-0.1519	-0.1519	-0.1519	-0.1519	-0.1519	-0.1519	-0.1519	-0.1519	-0.1519	-0.1519	-0.1519	-0.1519
adpac[c][e][x]	-0.1492	0.3533	0.3169	0.3169	0.3169	0.3317	0.3313	0.3416	0.3317	0.3173	0.3173	0.4849	0.2906	0.4501	0.3169	0.9052	0.2944	0.3486	1.5384	0.548	0.548	0.548	0.5014	0.4809	0.5105	0.0688	0.503	0.503	0.4347	0.5788	0.5685	0.4872	0.535	0.5144	1.2078	1.1949	1.1949	1.1949	0.4119	1.4501	0.5147	0.4119	0.4935	0.4935	0.6625	0.5509	0.5541	0.4409	1.2174
adpcoa[c][x]	-0.1492	0.3533	0.3169	0.3169	0.3169	0.3315	0.3313	0.3416	0.3317	0.3173	0.3173	0.4849	0.2906	0.4501	0.3169	0.9052	0.2944	0.3486	1.5384	0.548	0.548	0.548	0.5014	0.4809	0.5103	0.0688	0.503	0.503	0.4347	0.5788	0.5685	0.4872	0.535	0.5144	1.2078	1.1949	1.1949	1.1949	0.4119	1.4501	0.5147	0.4119	0.4935	0.4935	0.6625	0.5509	0.5541	0.4409	1.2174
adpman[c][e]	-0.1492	0.3533	0.3169	0.3169	0.3169	0.3313	0.3313	0.3416	0.3317	0.3173	0.3173	0.4849	0.2906	0.4501	0.3169	0.9052	0.2944	0.3486	1.5384	0.548	0.548	0.548	0.5014	0.4809	0.5102	0.0683	0.503	0.503	0.4347	0.5788	0.5685	0.4872	0.535	0.5144	1.2078	1.1949	1.1949	1.1949	0.4119	1.4501	0.5147	0.4119	0.4935	0.4935	0.6625	0.5509	0.5541	0.4409	1.2172
adrn[c][e][r]	1.3654	0.439	0.4414	0.4414	0.4414	0.4414	0.4414	0.4414	0.4414	0.4414	0.4414	0.4414	0.4414	0.4414	0.4414	0.4414	0.4414	0.4414	2.0067	0.6264	0.6264	0.6264	0.6264	0.8047	0.6264	0.6157	0.6264	0.6264	1.5315	0.6264	0.6264	1.8761	0.6264	0.6264	0.4975	0.4977	0.4977	0.4977	0.4977	0.4977	0.4977	0.4977	0.4977	0.4977	0.4977	0.4977	0.4977	0.4977	0.4977
adrncoa[c][m][r][x]	-0.1492	0.353	0.3169	0.3169	0.3169	0.3313	0.3313	0.3416	0.3317	0.3173	0.3173	0.4849	0.2906	0.4501	0.3169	0.9052	0.2944	0.3486	1.5384	0.548	0.548	0.548	0.5011	0.4809	0.5102	0.0685	0.503	0.503	0.4347	0.5788	0.5685	0.4872	0.535	0.5144	1.2078	1.1949	1.1949	1.1949	0.4119	1.4499	0.5147	0.4119	0.4935	0.4935	0.6625	0.5509	0.5538	0.4409	1.2172
adrncrn[c][m]	2.5132	0.354	0.3173	0.3173	0.3173	0.3321	0.3321	0.3424	0.3321	0.3177	0.3177	0.4834	0.2914	0.4504	0.3173	0.904	0.2951	0.3493	1.7381	1.2706	1.2706	1.2706	1.2457	1.2788	1.2506	0.0675	1.2467	1.2467	1.5606	1.2873	1.2817	1.7763	1.2636	1.2528	1.5535	1.6628	1.6628	1.6628	1.1354	1.8682	1.1916	1.1354	1.1799	1.1799	1.2766	1.2119	1.2137	1.1509	1.6802
adrnl[c][e]	-0.1492	0.3533	0.3169	0.3169	0.3169	0.3313	0.3313	0.3416	0.3317	0.3173	0.3173	0.4849	0.2906	0.4501	0.3169	0.9052	0.2944	0.3486	1.5384	0.548	0.548	0.548	0.5014	0.4809	0.5105	0.0688	0.503	0.503	0.4347	0.5788	0.5685	0.4872	0.535	0.5144	1.2078	1.1949	1.1949	1.1949	0.4119	1.4501	0.5147	0.4119	0.4935	0.4935	0.6625	0.5509	0.5541	0.4409	1.2174
agm[c][e][m]	-0.1492	0.3533	0.3169	0.3169	0.3169	0.3313	0.3313	0.3416	0.3317	0.3173	0.3173	0.4849	0.2906	0.4501	0.3169	0.9052	0.2944	0.3486	1.5384	0.548	0.548	0.548	0.5014	0.4809	0.5105	0.0688	0.503	0.503	0.4347	0.5788	0.5685	0.4872	0.535	0.5144	1.2078	1.1949	1.1949	1.1949	0.4119	1.4501	0.5147	0.4119	0.4935	0.4935	0.6625	0.5509	0.5541	0.4409	1.2174
ahcys[c][e][m][r]	1.0068	0.8562	0.8558	0.8558	0.8558	0.8558	0.8558	0.8558	0.8558	0.8558	0.8558	0.8558	0.8558	0.8558	0.8558	0.8559	0.8558	0.8558	1.3857	0.1752	0.1752	0.1752	0.1752	0.3194	0.1752	1.6037	0.1752	0.1752	0.9585	0.1752	0.1752	1.264	0.1752	0.1752	0.019	0.0191	0.0191	0.0191	0.0189	0.0192	0.019	0.0189	0.019	0.019	0.019	0.019	0.019	0.019	0.0191
aicar[c][e]	-0.1492	0.3529	0.3169	0.3169	0.3169	0.3313	0.3313	0.3416	0.3317	0.3173	0.3173	0.4849	0.2906	0.4497	0.3169	0.9052	0.2944	0.3493	1.5383	0.5479	0.5479	0.5479	0.501	0.4809	0.5102	0.0683	0.503	0.503	0.4347	0.5787	0.5685	0.4871	0.5349	0.5143	1.208	1.1951	1.1951	1.1951	0.4119	1.4501	0.5147	0.4119	0.4935	0.4935	0.6622	0.5506	0.5537	0.4409	1.2174
air[c]	-0.1492	0.3529	0.3169	0.3169	0.3169	0.3313	0.3313	0.3416	0.3317	0.3173	0.3173	0.4849	0.2906	0.4501	0.3169	0.9052	0.2944	0.3486	1.5384	0.548	0.548	0.548	0.501	0.4809	0.5102	0.0683	0.503	0.503	0.4347	0.5788	0.5685	0.4872	0.535	0.5144	1.2078	1.1949	1.1949	1.1949	0.4119	1.4499	0.5147	0.4119	0.4935	0.4935	0.6625	0.5509	0.5541	0.4409	1.2172
akg[c][e][m][x]	0.3096	0.33	0.3333	0.3333	0.3333	0.3333	0.3333	0.3333	0.3333	0.3333	0.3333	0.3333	0.3333	0.3333	0.3333	0.3333	0.3333	0.3333	1.8236	1.0586	1.0586	1.0586	1.0586	1.1439	1.0586	-0.2003	1.0586	1.0586	1.5104	1.0586	1.0586	1.7362	1.0586	1.0586	1.0006	1.0006	1.0006	1.0006	1.0005	1.0006	1.0005	1.0005	1.0005	1.0005	1.0005	1.0005	1.0005	1.0005	1.0006
ala_B[c][e]	-0.1473	0.3543	0.3183	0.3179	0.3183	0.3327	0.3327	0.343	0.3331	0.3183	0.3183	0.4856	0.292	0.4508	0.3183	0.9061	0.2958	0.3496	1.5394	0.5479	0.5479	0.5479	0.5011	0.4803	0.5103	0.0701	0.5027	0.5027	0.434	0.5786	0.5683	0.4876	0.5348	0.5142	1.2084	1.1957	1.1957	1.1957	0.4126	1.4506	0.5151	0.4126	0.4942	0.4942	0.6627	0.551	0.5542	0.4416	1.218
ala_D[c][e]	2.9146	1.9777	1.9816	1.9816	1.9816	1.9816	1.9816	1.9816	1.9816	1.9816	1.9816	1.9816	1.9816	1.9816	1.9816	1.9816	1.9816	1.9816	3.3107	1.8626	1.8626	1.8626	1.8626	1.9993	1.8626	2.808	1.8626	1.8626	2.5004	1.8626	1.8626	3.0985	1.8626	1.8626	1.6483	1.6476	1.6476	1.6476	1.6476	1.6477	1.6476	1.6476	1.6476	1.6476	1.6476	1.6476	1.6476	1.6476	1.6476
ala_L[c][e][m][x]	-0.0124	0.1947	0.1961	0.1961	0.1961	0.1961	0.1961	0.1961	0.1961	0.1961	0.1961	0.1961	0.1961	0.1961	0.1961	0.1961	0.1961	0.1961	0.5777	-0.4197	-0.4197	-0.4197	-0.4197	-0.324	-0.4197	0.6506	-0.4197	-0.4197	0.1596	-0.4197	-0.4197	0.4554	-0.4197	-0.4197	-0.5625	-0.5621	-0.5621	-0.5621	-0.5623	-0.562	-0.5623	-0.5623	-0.5623	-0.5623	-0.5622	-0.5623	-0.5623	-0.5623	-0.5621
alaala[c]	-9.9994	-9.4972	-9.5332	-9.5332	-9.5332	-9.5188	-9.5188	-9.5085	-9.5184	-9.5332	-9.5332	-9.3656	-9.5595	-9.4001	-9.5332	-8.9449	-9.5557	-9.5016	-8.3118	-9.3021	-9.3021	-9.3021	-9.3488	-9.3692	-9.3397	2.3727	-9.3472	-9.3472	-9.4155	-9.2714	-9.2817	-9.3629	-9.3152	-9.3358	-8.6423	-8.6552	-8.6552	-8.6552	-9.4383	-8.4001	-9.3354	-9.4383	-9.3567	-9.3567	-9.1876	-9.2993	-9.2961	-9.4093	-8.6327
alaargcys[c][e]	-0.1488	0.3537	0.3174	0.3174	0.3174	0.3318	0.3318	0.3421	0.3322	0.3178	0.3178	0.4854	0.2911	0.4505	0.3174	0.9057	0.2949	0.349	1.539	0.5485	0.5485	0.5485	0.5018	0.4814	0.511	11.3408	0.5035	0.5035	0.4352	0.5792	0.569	0.4877	0.5355	0.5149	1.2083	1.1954	1.1954	1.1954	0.4124	1.4505	0.5152	0.4124	0.4939	0.4939	0.663	0.5514	0.5545	0.4413	1.2179
alaarggly[c][e]	-10.1654	-9.6632	-9.6996	-9.6996	-9.6996	-9.6848	-9.6848	-9.6745	-9.6848	-9.6992	-9.6992	-9.5316	-9.7255	-9.5664	-9.6996	-9.1112	-9.7217	-9.6676	-8.4776	-9.4681	-9.4681	-9.4681	-9.5148	-9.5352	-9.506	-9.95	-9.5131	-9.5131	-9.5814	-9.4374	-9.4476	-9.5289	-9.4811	-9.5017	-8.8083	-8.8212	-8.8212	-8.8212	-9.6042	-8.5661	-9.5014	-9.6042	-9.5227	-9.5227	-9.3539	-9.4652	-9.4621	-9.5753	-8.7989
alaasnleu[c][e]	0.6928	0.2172	0.2173	0.2173	0.2173	0.2173	0.2173	0.2173	0.2173	0.2173	0.2173	0.2173	0.2173	0.2173	0.2173	0.2173	0.2173	0.2173	-10.8805	-11.8708	-11.8708	-11.8708	-11.9175	-11.9379	-11.9083	0.5484	-11.9158	-11.9158	-11.9841	-11.84	-11.8503	-11.9316	-11.8838	-11.9044	-11.211	-11.2239	-11.2239	-11.2239	-12.0069	-10.9688	-11.9041	-12.0069	-11.9253	-11.9253	-11.7563	-11.8679	-11.8648	-11.978	-11.2014
alaglylys[c][e]	-12.4701	-0.1993	-0.1984	-0.1984	-0.1984	-0.1984	-0.1984	-0.1984	-0.1984	-0.1984	-0.1984	-0.1984	-0.1984	-0.1984	-0.1984	-0.1984	-0.1984	-0.1984	-10.7799	-11.7706	-11.7706	-11.7706	-11.8173	-11.8374	-11.8081	-0.9561	-11.8153	-11.8153	-11.8836	-11.7395	-11.7498	-11.8311	-11.7836	-11.8042	-11.1107	-11.1236	-11.1236	-11.1236	-11.9067	-10.8684	-11.8039	-11.9067	-11.8251	-11.8251	-11.6561	-11.7677	-11.7645	-11.8778	-11.1011
alahisala[c][e]	0.5473	0.7807	0.7824	0.7824	0.7824	0.7824	0.7824	0.7824	0.7824	0.7824	0.7824	0.7824	0.7824	0.7824	0.7824	0.7824	0.7824	0.7824	-11.7688	-12.7592	-12.7592	-12.7592	-12.8059	-12.827	-12.7968	0.8128	-12.8043	-12.8043	-12.8726	-12.7285	-12.7388	-12.8201	-12.7723	-12.7929	-12.0973	-12.1101	-12.1101	-12.1101	-12.8933	-11.8552	-12.7906	-12.8933	-12.8118	-12.8118	-12.6427	-12.7542	-12.751	-12.8644	-12.0881
alalysthr[c][e]	0.8184	-0.1696	-0.1733	-0.1733	-0.1733	-0.1733	-0.1733	-0.1733	-0.1733	-0.1733	-0.1733	-0.1733	-0.1733	-0.1733	-0.1733	-0.1733	-0.1733	-0.1733	-10.1196	-11.1099	-11.1099	-11.1099	-11.1566	-11.1771	-11.1475	0.7458	-11.155	-11.155	-11.2233	-11.0792	-11.0895	-11.1708	-11.123	-11.1436	-10.4501	-10.463	-10.463	-10.463	-11.2461	-10.2079	-11.1433	-11.2461	-11.1645	-11.1645	-10.9954	-11.1071	-11.1039	-11.2171	-10.4406
aldstrn[c][e][m]	-0.1492	0.3533	0.3169	0.3169	0.3169	0.3317	0.3313	0.3416	0.3317	0.3173	0.3173	0.4849	0.2906	0.4501	0.3169	0.9052	0.2944	0.3486	1.5384	0.548	0.548	0.548	0.5014	0.4809	0.5102	0.0688	0.503	0.503	0.4347	0.5788	0.5685	0.4872	0.535	0.5144	1.2078	1.1949	1.1949	1.1949	0.4119	1.4501	0.5147	0.4119	0.4935	0.4935	0.6625	0.5509	0.5541	0.4409	1.2174
allop[c][e]	-0.1449	0.3535	0.3175	0.3175	0.3175	0.3323	0.3319	0.3426	0.3323	0.3178	0.3178	0.485	0.2912	0.4505	0.3175	0.9058	0.2949	0.3491	1.5384	0.5461	0.5461	0.5461	0.4992	0.4787	0.5084	0.0702	0.5009	0.5009	0.432	0.5769	0.5669	0.4864	0.533	0.5123	1.2062	1.1933	1.1933	1.1933	0.4098	1.4482	0.5123	0.4098	0.492	0.492	0.6606	0.5483	0.5515	0.4389	1.2156
alltn[c][e]	-0.1492	0.3533	0.3169	0.3169	0.3169	0.3313	0.3313	0.3416	0.3317	0.3173	0.3173	0.4849	0.2906	0.4501	0.3169	0.9052	0.2944	0.3486	1.5384	0.548	0.548	0.548	0.501	0.4809	0.5102	0.0683	0.503	0.503	0.4347	0.5788	0.5685	0.4872	0.535	0.5144	1.2078	1.1949	1.1949	1.1949	0.4119	1.4501	0.5147	0.4119	0.4935	0.4935	0.6625	0.5509	0.5537	0.4409	1.2172
amet[c][e][m][r]	1.0068	0.8562	0.8558	0.8558	0.8558	0.8558	0.8558	0.8558	0.8558	0.8558	0.8558	0.8559	0.8558	0.8558	0.8558	0.8559	0.8558	0.8558	1.3857	0.1752	0.1752	0.1752	0.1752	0.3194	0.1752	1.6037	0.1752	0.1752	0.9585	0.1752	0.1752	1.264	0.1752	0.1752	0.019	0.0191	0.0191	0.0191	0.0189	0.0192	0.019	0.0189	0.019	0.019	0.019	0.019	0.019	0.0189	0.0191
ametam[c][e]	-0.1492	0.3533	0.3169	0.3169	0.3169	0.3313	0.3313	0.3416	0.3317	0.3173	0.3173	0.4849	0.2906	0.4501	0.3169	0.9052	0.2944	0.3486	1.5384	0.548	0.548	0.548	0.5014	0.4809	0.5102	0.0683	0.503	0.503	0.4347	0.5788	0.5685	0.4872	0.535	0.5144	1.2078	1.1949	1.1949	1.1949	0.4119	1.4501	0.5147	0.4119	0.4935	0.4935	0.6625	0.5509	0.5541	0.4409	1.2172
amp[c][e][l][m][n][r][x]	-2.1718	-1.2636	-1.2637	-1.2637	-1.2637	-1.2637	-1.2637	-1.2637	-1.2637	-1.2637	-1.2637	-1.2637	-1.2637	-1.2637	-1.2637	-1.2636	-1.2637	-1.2637	-0.2352	0.1337	0.1337	0.1337	0.1337	0.1411	0.1337	-1.7783	0.1337	0.1337	0.1093	0.1337	0.1337	-0.1352	0.1337	0.1337	-0.0841	-0.0841	-0.0841	-0.0841	-0.0842	-0.0841	-0.0842	-0.0842	-0.0842	-0.0842	-0.0842	-0.0842	-0.0842	-0.0842	-0.0841
and19one[c][e]	-0.1492	0.3533	0.3169	0.3169	0.3169	0.3313	0.3313	0.3416	0.3317	0.3173	0.3173	0.4849	0.2906	0.4501	0.3169	0.9052	0.2944	0.3486	1.5384	0.548	0.548	0.548	0.5014	0.4809	0.5102	0.0688	0.503	0.503	0.4347	0.5788	0.5685	0.4872	0.535	0.5144	1.2078	1.1949	1.1949	1.1949	0.4119	1.4501	0.5147	0.4119	0.4935	0.4935	0.6625	0.5509	0.5541	0.4409	1.2172
andrstandn[c][e][r]	-0.1492	0.3533	0.3169	0.3169	0.3169	0.3313	0.3313	0.3416	0.3317	0.3173	0.3173	0.4849	0.2906	0.4501	0.3169	0.9052	0.2944	0.3486	1.5384	0.548	0.548	0.548	0.501	0.4809	0.5102	0.0683	0.503	0.503	0.4347	0.5788	0.5685	0.4872	0.535	0.5144	1.2078	1.1949	1.1949	1.1949	0.4119	1.4501	0.5147	0.4119	0.4935	0.4935	0.6625	0.5509	0.5541	0.4409	1.2174
andrstndn[c][e][r]	-0.149	0.3533	0.3171	0.317	0.3171	0.3316	0.3316	0.3419	0.3318	0.3173	0.3173	0.485	0.2909	0.4501	0.3171	0.9053	0.2947	0.3488	1.5384	0.5481	0.5481	0.5481	0.5013	0.481	0.5102	0.0685	0.5031	0.5031	0.4349	0.5788	0.5686	0.4873	0.5351	0.5145	1.208	1.1952	1.1952	1.1952	0.4121	1.4502	0.5148	0.4121	0.4935	0.4935	0.6626	0.551	0.5541	0.4409	1.2176
andrstrn[c][e][r]	-0.1492	0.3533	0.3169	0.3169	0.3169	0.3313	0.3313	0.3416	0.3317	0.3173	0.3173	0.4849	0.2906	0.4501	0.3169	0.9052	0.2944	0.3486	1.5384	0.548	0.548	0.548	0.5014	0.4809	0.5102	0.0683	0.503	0.503	0.4347	0.5788	0.5685	0.4872	0.535	0.5144	1.2078	1.1949	1.1949	1.1949	0.4119	1.4501	0.5147	0.4119	0.4935	0.4935	0.6625	0.5509	0.5541	0.4409	1.2172
aprgstrn[c][e]	0.4374	0.3708	0.3718	0.3718	0.3718	0.3718	0.3718	0.3718	0.3718	0.3718	0.3718	0.3718	0.3718	0.3718	0.3718	0.3718	0.3718	0.3718	2.029	0.6996	0.6996	0.6996	0.6996	0.8366	0.6996	0.1644	0.6996	0.6996	1.5434	0.6996	0.6996	1.8871	0.6996	0.6996	0.6304	0.6304	0.6304	0.6304	0.6304	0.6304	0.6304	0.6304	0.6304	0.6304	0.6304	0.6304	0.6304	0.6304	0.6304
arab_L[c][e]	-0.1492	0.3533	0.3169	0.3169	0.3169	0.3313	0.3313	0.3416	0.3317	0.3173	0.3173	0.4849	0.2906	0.4501	0.3169	0.9052	0.2944	0.3486	1.5384	0.548	0.548	0.548	0.5014	0.4809	0.5105	0.0688	0.503	0.503	0.4347	0.5788	0.5685	0.4872	0.535	0.5144	1.2078	1.1949	1.1949	1.1949	0.4119	1.4501	0.5147	0.4119	0.4935	0.4935	0.6625	0.5509	0.5541	0.4409	1.2174
arach[c][e][r]	-38.0475	0.439	0.4414	0.4414	0.4414	0.4414	0.4414	0.4414	0.4414	0.4414	0.4414	0.4414	0.4414	0.4414	0.4414	0.4414	0.4414	0.4414	2.0067	0.6264	0.6264	0.6264	0.6264	0.8047	0.6264	0.6157	0.6264	0.6264	1.5315	0.6264	0.6264	1.8761	0.6264	0.6264	0.4975	0.4977	0.4977	0.4977	0.4977	0.4977	0.4977	0.4977	0.4977	0.4977	0.4977	0.4977	0.4977	0.4977	0.4977
arachcoa[c][m][r][x]	-0.1492	0.3533	0.3169	0.3169	0.3169	0.3317	0.3313	0.3416	0.3317	0.3173	0.3173	0.4849	0.2906	0.4501	0.3169	0.9052	0.2944	0.3486	1.5384	0.548	0.548	0.548	0.5014	0.4809	0.5105	0.0686	0.503	0.503	0.4347	0.5788	0.5685	0.4872	0.535	0.5144	1.2078	1.1949	1.1949	1.1949	0.4119	1.4501	0.5147	0.4119	0.4935	0.4935	0.6625	0.5509	0.5541	0.4409	1.2174
arachcrn[c][m]	2.5132	0.354	0.3175	0.3173	0.3175	0.3321	0.3321	0.3424	0.3321	0.3177	0.3177	0.4834	0.2914	0.4504	0.3175	0.904	0.2951	0.3493	1.7381	1.2706	1.2706	1.2706	1.2458	1.2788	1.2506	0.0675	1.2467	1.2467	1.5607	1.2873	1.2819	1.7763	1.2636	1.2528	1.5537	1.6629	1.6629	1.6629	1.1355	1.8683	1.1918	1.1355	1.1799	1.1799	1.2766	1.212	1.2139	1.1511	1.6804
arachd[c][e][r][x]	-10.9949	0.4872	0.4893	0.4893	0.4893	0.4893	0.4893	0.4893	0.4893	0.4893	0.4893	0.4893	0.4893	0.4893	0.4893	0.4893	0.4893	0.4893	2.0186	0.6969	0.6969	0.6969	0.6969	0.8612	0.6969	0.6739	0.6969	0.6969	1.5548	0.6969	0.6969	1.8904	0.6969	0.6969	0.5801	0.5804	0.5804	0.5804	0.5803	0.5804	0.5803	0.5803	0.5803	0.5803	0.5803	0.5803	0.5803	0.5803	0.5804
arachdcoa[c][m][r][x]	-0.1492	0.3532	0.3171	0.3169	0.3171	0.3317	0.3316	0.3418	0.3319	0.3173	0.3173	0.4845	0.2909	0.4502	0.3171	0.9051	0.2946	0.3488	1.5382	0.5479	0.5479	0.5479	0.5012	0.4808	0.5101	0.0685	0.5028	0.5028	0.4346	0.5786	0.5683	0.4871	0.5348	0.5142	1.2081	1.1954	1.1954	1.1954	0.4121	1.4504	0.5149	0.4121	0.4937	0.4937	0.6623	0.5511	0.5542	0.4411	1.2177
arachdcrn[c][m][r][x]	1.4973	0.3536	0.3172	0.3172	0.3172	0.332	0.3316	0.3419	0.332	0.3176	0.3176	0.4842	0.2911	0.4502	0.3172	0.9047	0.2948	0.3488	1.6215	0.8812	0.8812	0.8812	0.846	0.854	0.8529	0.0679	0.8473	0.8473	0.993	0.9046	0.8967	1.1443	0.8713	0.8558	1.3563	1.4006	1.4006	1.4006	0.7457	1.632	0.8242	0.7457	0.8079	0.8079	0.94	0.8523	0.8548	0.7677	1.4206
arg_L[c][e][m]	0.5655	0.2146	0.2156	0.2156	0.2156	0.2156	0.2156	0.2157	0.2156	0.2156	0.2156	0.2158	0.2156	0.2158	0.2156	0.2163	0.2156	0.2157	1.3275	0.6315	0.6315	0.6315	0.6315	0.7101	0.6315	0.1829	0.6315	0.6315	1.0662	0.6315	0.6315	1.2577	0.6315	0.6315	0.5611	0.5611	0.5611	0.5611	0.5603	0.5614	0.5604	0.5603	0.5604	0.5604	0.5605	0.5604	0.5604	0.5603	0.5611
argalaala[c][e]	-10.4144	-9.9123	-9.9483	-9.9483	-9.9483	-9.9338	-9.9338	-9.9236	-9.9335	-9.9483	-9.9483	-9.7806	-9.9746	-9.8151	-9.9483	-9.36	-9.9708	-9.9166	-8.7268	-9.7171	-9.7171	-9.7171	-9.7638	-9.7843	-9.7547	2.3727	-9.7622	-9.7622	-9.8305	-9.6864	-9.6967	-9.778	-9.7302	-9.7508	-9.0574	-9.0703	-9.0703	-9.0703	-9.8533	-8.8151	-9.7505	-9.8533	-9.7717	-9.7717	-9.6027	-9.7143	-9.7111	-9.8243	-9.0478
argalaphe[c][e]	-0.1483	0.3538	0.3178	0.3175	0.3178	0.3323	0.3323	0.3425	0.3323	0.3178	0.3178	0.4855	0.2916	0.451	0.3178	0.9059	0.2954	0.3495	1.5394	0.549	0.549	0.549	0.5023	0.4818	0.5114	11.5145	0.5039	0.5039	0.4356	0.5797	0.5694	0.4881	0.5359	0.5153	1.2088	1.1959	1.1959	1.1959	0.4128	1.451	0.5156	0.4128	0.4944	0.4944	0.6635	0.5518	0.555	0.4418	1.2183
argalathr[c][e]	-0.1483	0.3542	0.3178	0.3178	0.3178	0.3326	0.3323	0.3425	0.3326	0.3182	0.3182	0.4858	0.2916	0.451	0.3178	0.9061	0.2954	0.3495	1.5393	0.549	0.549	0.549	0.5023	0.4818	0.5114	10.8049	0.5039	0.5039	0.4356	0.5797	0.5694	0.4881	0.5359	0.5153	1.2088	1.1959	1.1959	1.1959	0.4128	1.451	0.5156	0.4128	0.4944	0.4944	0.6635	0.5518	0.555	0.4418	1.2183
argarg[c][e]	-0.1492	0.3533	0.3169	0.3169	0.3169	0.3317	0.3313	0.3416	0.3317	0.3173	0.3173	0.4849	0.2906	0.4501	0.3169	0.9052	0.2944	0.3486	1.5385	0.548	0.548	0.548	0.5014	0.4809	0.5105	0.0683	0.503	0.503	0.4347	0.5788	0.5685	0.4872	0.535	0.5144	1.2078	1.1949	1.1949	1.1949	0.4119	1.4501	0.5147	0.4119	0.4935	0.4935	0.6625	0.5509	0.5541	0.4409	1.2172
argarglys[c][e]	-0.1492	0.3533	0.3169	0.3169	0.3169	0.3317	0.3313	0.3416	0.3317	0.3173	0.3173	0.4849	0.2906	0.4501	0.3169	0.9052	0.2944	0.3486	1.5384	0.548	0.548	0.548	0.5014	0.4809	0.5105	0.0683	0.503	0.503	0.4347	0.5788	0.5685	0.4872	0.535	0.5144	1.2078	1.1949	1.1949	1.1949	0.4119	1.4501	0.5147	0.4119	0.4935	0.4935	0.6625	0.5509	0.5541	0.4409	1.2174
argargmet[c][e]	-0.1492	0.3533	0.3169	0.3169	0.3169	0.3317	0.3313	0.3416	0.3317	0.3173	0.3173	0.4849	0.2906	0.4501	0.3169	0.9052	0.2944	0.3486	1.5385	0.548	0.548	0.548	0.5014	0.4809	0.5105	0.0683	0.503	0.503	0.4347	0.5788	0.5685	0.4872	0.535	0.5144	1.2078	1.1949	1.1949	1.1949	0.4119	1.4501	0.5147	0.4119	0.4935	0.4935	0.6625	0.5509	0.5541	0.4409	1.2174
argcysgly[c][e]	-0.1488	0.3534	0.3174	0.3174	0.3174	0.3318	0.3318	0.3421	0.3322	0.3178	0.3178	0.485	0.2911	0.4505	0.3174	0.9054	0.2949	0.349	1.5388	0.5482	0.5482	0.5482	0.5015	0.4814	0.5106	0.0688	0.5031	0.5031	0.4352	0.5789	0.569	0.4877	0.5351	0.5145	1.2081	1.1952	1.1952	1.1952	0.412	1.4503	0.5149	0.412	0.4936	0.4936	0.6627	0.551	0.5542	0.441	1.2175
argcysser[c][e]	-0.1492	0.3533	0.3169	0.3169	0.3169	0.3317	0.3313	0.3416	0.3317	0.3173	0.3173	0.4849	0.2906	0.4501	0.3169	0.9052	0.2944	0.3486	1.5384	0.548	0.548	0.548	0.5014	0.4809	0.5105	0.0688	0.503	0.503	0.4347	0.5788	0.5685	0.4872	0.535	0.5144	1.2078	1.1949	1.1949	1.1949	0.4119	1.4501	0.5147	0.4119	0.4935	0.4935	0.6625	0.5509	0.5541	0.4409	1.2174
arggluglu[c][e]	-0.1492	0.3533	0.3169	0.3169	0.3169	0.3317	0.3313	0.3416	0.3317	0.3173	0.3173	0.4849	0.2906	0.4501	0.3169	0.9052	0.2944	0.3486	1.5384	0.548	0.548	0.548	0.5014	0.4809	0.5105	0.0688	0.503	0.503	0.4347	0.5788	0.5685	0.4872	0.535	0.5144	1.2078	1.1949	1.1949	1.1949	0.4119	1.4501	0.5147	0.4119	0.4935	0.4935	0.6625	0.5509	0.5541	0.4409	1.2174
argglupro[c][e]	-0.1492	0.3533	0.3169	0.3169	0.3169	0.3317	0.3313	0.3416	0.3317	0.3173	0.3173	0.4849	0.2906	0.4501	0.3169	0.9052	0.2944	0.3486	1.5384	0.548	0.548	0.548	0.5014	0.4809	0.5105	0.0688	0.503	0.503	0.4347	0.5788	0.5685	0.4872	0.535	0.5144	1.2078	1.1949	1.1949	1.1949	0.4119	1.4501	0.5147	0.4119	0.4935	0.4935	0.6625	0.5509	0.5541	0.4409	1.2174
argglygly[c][e]	-7.3784	-6.8763	-6.9127	-6.9127	-6.9127	-6.8979	-6.8979	-6.8876	-6.8979	-6.9123	-6.9123	-6.7446	-6.9386	-6.7795	-6.9127	-6.3242	-6.9348	-6.8807	-5.6901	-6.6847	-6.6847	-6.6847	-6.7311	-6.748	-6.722	-7.1609	-6.7295	-6.7295	-6.7938	-6.6529	-6.6635	-6.742	-6.6977	-6.7181	-6.0264	-6.0393	-6.0393	-6.0393	-6.8225	-5.7843	-6.7197	-6.8225	-6.741	-6.741	-6.5749	-6.6824	-6.6789	-6.7935	-6.017
arghisthr[c][e]	-0.1492	0.3533	0.3169	0.3169	0.3169	0.3317	0.3313	0.3416	0.3317	0.3173	0.3173	0.4849	0.2906	0.4501	0.3169	0.9052	0.2944	0.3486	1.5384	0.548	0.548	0.548	0.5014	0.4809	0.5102	0.0683	0.503	0.503	0.4347	0.5788	0.5685	0.4872	0.535	0.5144	1.2078	1.1949	1.1949	1.1949	0.4119	1.4501	0.5147	0.4119	0.4935	0.4935	0.6625	0.5509	0.5541	0.4409	1.2172
argleuphe[c][e]	-0.1492	0.3533	0.3169	0.3169	0.3169	0.3313	0.3313	0.3416	0.3317	0.3173	0.3173	0.4849	0.2906	0.4501	0.3169	0.9052	0.2944	0.3486	1.5384	0.548	0.548	0.548	0.501	0.4809	0.5102	0.0683	0.503	0.503	0.4347	0.5788	0.5685	0.4872	0.535	0.5144	1.2078	1.1949	1.1949	1.1949	0.4119	1.4499	0.5144	0.4119	0.4935	0.4935	0.6625	0.5506	0.5537	0.4409	1.2172
arglysasp[c][e]	-0.1492	0.3533	0.3169	0.3169	0.3169	0.3317	0.3313	0.3416	0.3317	0.3173	0.3173	0.4849	0.2906	0.4501	0.3169	0.9052	0.2944	0.3486	1.5384	0.548	0.548	0.548	0.5014	0.4809	0.5105	0.0683	0.503	0.503	0.4347	0.5788	0.5685	0.4872	0.535	0.5144	1.2078	1.1949	1.1949	1.1949	0.4119	1.4501	0.5147	0.4119	0.4935	0.4935	0.6625	0.5509	0.5541	0.4409	1.2174
argphearg[c][e]	-0.1492	0.3533	0.3169	0.3169	0.3169	0.3317	0.3313	0.3416	0.3317	0.3173	0.3173	0.4849	0.2906	0.4501	0.3169	0.9052	0.2944	0.3486	1.5385	0.548	0.548	0.548	0.5014	0.4809	0.5102	0.0683	0.503	0.503	0.4347	0.5788	0.5685	0.4872	0.535	0.5144	1.2078	1.1949	1.1949	1.1949	0.4119	1.4501	0.5147	0.4119	0.4935	0.4935	0.6625	0.5509	0.5541	0.4409	1.2172
argpromet[c][e]	-0.1492	0.3533	0.3169	0.3169	0.3169	0.3317	0.3313	0.3416	0.3317	0.3173	0.3173	0.4849	0.2906	0.4501	0.3169	0.9052	0.2944	0.3486	1.5384	0.548	0.548	0.548	0.5014	0.4809	0.5105	0.0683	0.503	0.503	0.4347	0.5788	0.5685	0.4872	0.535	0.5144	1.2078	1.1949	1.1949	1.1949	0.4119	1.4501	0.5147	0.4119	0.4935	0.4935	0.6625	0.5509	0.5541	0.4409	1.2172
argprothr[c][e]	-0.1492	0.3533	0.3169	0.3169	0.3169	0.3317	0.3313	0.3416	0.3317	0.3173	0.3173	0.4849	0.2906	0.4501	0.3169	0.9052	0.2944	0.3486	1.5384	0.548	0.548	0.548	0.5014	0.4809	0.5105	0.0683	0.503	0.503	0.4347	0.5788	0.5685	0.4872	0.535	0.5144	1.2078	1.1949	1.1949	1.1949	0.4119	1.4501	0.5147	0.4119	0.4935	0.4935	0.6625	0.5509	0.5541	0.4409	1.2174
argserser[c][e]	-0.1492	0.3533	0.3169	0.3169	0.3169	0.3313	0.3313	0.3416	0.3317	0.3173	0.3173	0.4849	0.2906	0.4501	0.3169	0.9052	0.2944	0.3486	1.5384	0.548	0.548	0.548	0.5014	0.4809	0.5105	0.0688	0.503	0.503	0.4347	0.5788	0.5685	0.4872	0.535	0.5144	1.2078	1.1949	1.1949	1.1949	0.4119	1.4501	0.5147	0.4119	0.4935	0.4935	0.6625	0.5509	0.5541	0.4409	1.2174
argsuc[c][e]	-0.1492	0.3533	0.3169	0.3169	0.3169	0.3317	0.3313	0.3416	0.3317	0.3173	0.3173	0.4849	0.2906	0.4501	0.3169	0.9052	0.2944	0.3486	1.5384	0.548	0.548	0.548	0.5014	0.4809	0.5102	0.0688	0.503	0.503	0.4347	0.5788	0.5685	0.4872	0.535	0.5144	1.2078	1.1949	1.1949	1.1949	0.4119	1.4501	0.5147	0.4119	0.4935	0.4935	0.6625	0.5509	0.5541	0.4409	1.2174
argtyrval[c][e]	-0.1492	0.3533	0.3169	0.3169	0.3169	0.3317	0.3313	0.3416	0.3317	0.3173	0.3173	0.4849	0.2906	0.4501	0.3169	0.9052	0.2944	0.3486	1.5384	0.548	0.548	0.548	0.5014	0.4809	0.5105	0.0688	0.503	0.503	0.4347	0.5788	0.5685	0.4872	0.535	0.5144	1.2078	1.1949	1.1949	1.1949	0.4119	1.4501	0.5147	0.4119	0.4935	0.4935	0.6625	0.5509	0.5541	0.4409	1.2174
argvalcys[c][e]	-0.1492	0.3533	0.3169	0.3169	0.3169	0.3317	0.3313	0.3416	0.3317	0.3173	0.3173	0.4849	0.2906	0.4501	0.3169	0.9052	0.2944	0.3486	1.5385	0.548	0.548	0.548	0.5014	0.4809	0.5105	0.0688	0.503	0.503	0.4347	0.5788	0.5685	0.4872	0.535	0.5144	1.2078	1.1949	1.1949	1.1949	0.4119	1.4501	0.5147	0.4119	0.4935	0.4935	0.6625	0.5509	0.5541	0.4409	1.2174
argvaltrp[c][e]	-0.1492	0.3533	0.3169	0.3169	0.3169	0.3317	0.3313	0.3416	0.3317	0.3173	0.3173	0.4849	0.2906	0.4501	0.3169	0.9052	0.2944	0.3486	1.5385	0.548	0.548	0.548	0.5014	0.4809	0.5105	0.0688	0.503	0.503	0.4347	0.5788	0.5685	0.4872	0.535	0.5144	1.2078	1.1949	1.1949	1.1949	0.4119	1.4501	0.5147	0.4119	0.4935	0.4935	0.6625	0.5509	0.5541	0.4409	1.2174
ascb_L[c][e]	0.9534	0.5322	0.5332	0.5332	0.5332	0.5332	0.5332	0.5332	0.5332	0.5332	0.5332	0.5332	0.5332	0.5332	0.5332	0.5332	0.5332	0.5332	1.6654	0.52	0.52	0.52	0.52	0.8565	0.52	0.4983	0.52	0.52	1.3522	0.52	0.52	1.5758	0.52	0.52	0.3849	0.3843	0.3843	0.3843	0.3843	0.3843	0.3843	0.3843	0.3843	0.3843	0.3843	0.3843	0.3843	0.3843	0.3843
asn_L[c][e]	0.1931	0.1531	0.1535	0.1535	0.1535	0.1535	0.1535	0.1535	0.1535	0.1535	0.1535	0.1535	0.1535	0.1535	0.1535	0.1536	0.1535	0.1535	0.7961	0.3874	0.3874	0.3874	0.3874	0.4284	0.3874	0.1336	0.3874	0.3874	0.6167	0.3874	0.3874	0.7426	0.3874	0.3874	0.3584	0.3584	0.3584	0.3584	0.3581	0.3586	0.3582	0.3581	0.3582	0.3582	0.3582	0.3582	0.3582	0.3581	0.3585
asnasnarg[c][e]	-0.1492	0.3533	0.3169	0.3169	0.3169	0.3317	0.3313	0.3416	0.3317	0.3173	0.3173	0.4849	0.2906	0.4501	0.3169	0.9052	0.2944	0.3486	1.5385	0.548	0.548	0.548	0.5014	0.4809	0.5105	0.0683	0.503	0.503	0.4347	0.5788	0.5685	0.4872	0.535	0.5144	1.2078	1.1949	1.1949	1.1949	0.4119	1.4501	0.5147	0.4119	0.4935	0.4935	0.6625	0.5509	0.5541	0.4409	1.2174
asncyscys[c][e]	-9.8486	0.7065	0.7062	0.7062	0.7062	0.7062	0.7062	0.7062	0.7062	0.7062	0.7062	0.7062	0.7062	0.7062	0.7062	0.7062	0.7062	0.7062	-8.1608	-9.1513	-9.1513	-9.1513	-9.198	-9.2184	-9.1889	1.2388	-9.1964	-9.1964	-9.2646	-9.1206	-9.1309	-9.2121	-9.1644	-9.185	-8.4913	-8.5042	-8.5042	-8.5042	-9.2874	-8.2491	-9.1846	-9.2874	-9.2059	-9.2059	-9.0368	-9.1485	-9.1453	-9.2585	-8.4819
asnmetpro[c][e]	-9.7561	-9.2563	-9.2927	-9.2927	-9.2927	-9.2783	-9.2783	-9.268	-9.2779	-9.2924	-9.2924	-9.1252	-9.3191	-9.1601	-9.2927	-8.7047	-9.3153	-9.2611	-8.0689	-0.193	-0.193	-0.193	-0.193	-9.1278	-0.193	-9.5498	-0.193	-0.193	-9.1727	-0.193	-0.193	-9.1202	-0.193	-0.193	-0.4258	-0.4289	-0.4289	-0.4289	-0.4289	-0.4289	-0.4289	-0.4289	-0.4289	-0.4289	-0.4289	-0.4289	-0.4289	-0.4289	-0.4289
asnpheasp[c][e]	-0.1492	0.3529	0.3165	0.3165	0.3165	0.3313	0.3313	0.3416	0.3313	0.3169	0.3169	0.4846	0.2906	0.4501	0.3169	0.905	0.2944	0.3486	1.5384	0.548	0.548	0.548	0.5014	0.4809	0.5102	0.0683	0.503	0.503	0.4347	0.5788	0.5685	0.4872	0.535	0.5144	1.2078	1.1949	1.1949	1.1949	0.4119	1.4501	0.5147	0.4119	0.4935	0.4935	0.6622	0.5509	0.5541	0.4409	1.2172
asnphecys[c][e]	-10.7035	0.772	0.7724	0.7724	0.7724	0.7724	0.7724	0.7724	0.7724	0.7724	0.7724	0.7724	0.7724	0.7724	0.7724	0.7724	0.7724	0.7724	-9.0163	-10.0067	-10.0067	-10.0067	-10.0534	-10.0739	-10.0443	0.6081	-10.0518	-10.0518	-10.1201	-9.976	-9.9863	-10.0676	-10.0198	-10.0404	-9.3467	-9.3596	-9.3596	-9.3596	-10.1429	-9.1046	-10.0401	-10.1429	-10.0613	-10.0613	-9.8922	-10.0036	-10.0007	-10.1139	-9.3374
asntyrgly[c][e]	-0.1488	0.3534	0.317	0.317	0.317	0.3318	0.3318	0.3421	0.3318	0.3174	0.3174	0.485	0.2911	0.4502	0.317	0.9054	0.2949	0.349	1.5388	0.5485	0.5485	0.5485	0.5018	0.4814	0.5106	0.0688	0.5035	0.5035	0.4352	0.5792	0.569	0.4877	0.5355	0.5149	1.2083	1.1954	1.1954	1.1954	0.4124	1.4503	0.5149	0.4124	0.4939	0.4939	0.6627	0.551	0.5542	0.4413	1.2177
asntyrphe[c][e]	-0.1487	0.3529	0.3165	0.3165	0.3165	0.3313	0.331	0.3416	0.3313	0.3169	0.3169	0.4846	0.2903	0.4497	0.3165	0.905	0.294	0.3486	1.5385	0.548	0.548	0.548	0.5014	0.4809	0.5105	0.0683	0.503	0.503	0.4347	0.5788	0.5685	0.4872	0.535	0.5144	1.2078	1.1949	1.1949	1.1949	0.4119	1.4501	0.5147	0.4119	0.4935	0.4935	0.6625	0.5509	0.5541	0.4409	1.2172
asntyrthr[c][e]	-0.1487	0.3529	0.3165	0.3165	0.3165	0.3313	0.3313	0.3416	0.3313	0.3169	0.3169	0.4846	0.2906	0.4501	0.3165	0.905	0.2944	0.3486	1.5385	0.548	0.548	0.548	0.5014	0.4809	0.5105	0.0683	0.503	0.503	0.4347	0.5788	0.5685	0.4872	0.535	0.5144	1.2078	1.1951	1.1951	1.1951	0.4119	1.4501	0.5147	0.4119	0.4935	0.4935	0.6625	0.5509	0.5541	0.4409	1.2174
asp_L[c][e][m]	0.7724	0.6409	0.6408	0.6408	0.6408	0.6408	0.6408	0.6408	0.6408	0.6408	0.6408	0.6409	0.6408	0.6409	0.6408	0.641	0.6408	0.6408	-0.3766	-0.3193	-0.3193	-0.3193	-0.3193	-0.362	-0.3193	0.0228	-0.3193	-0.3193	-0.3777	-0.3193	-0.3193	-0.3777	-0.3193	-0.3193	-0.073	-0.073	-0.073	-0.073	-0.0735	-0.0728	-0.0735	-0.0735	-0.0735	-0.0735	-0.0734	-0.0734	-0.0734	-0.0735	-0.073
aspalaarg[c][e]	-0.1492	0.3533	0.3169	0.3169	0.3169	0.3317	0.3313	0.3416	0.3317	0.3173	0.3173	0.4849	0.2906	0.4501	0.3169	0.9052	0.2944	0.3486	1.5384	0.548	0.548	0.548	0.5014	0.4809	0.5105	0.0683	0.503	0.503	0.4347	0.5788	0.5685	0.4872	0.535	0.5144	1.2078	1.1949	1.1949	1.1949	0.4119	1.4501	0.5147	0.4119	0.4935	0.4935	0.6625	0.5509	0.5541	0.4409	1.2174
aspasnglu[c][e]	-0.1492	0.3533	0.3169	0.3169	0.3169	0.3317	0.3313	0.3416	0.3317	0.3173	0.3173	0.4849	0.2906	0.4501	0.3169	0.9052	0.2944	0.3486	1.5384	0.548	0.548	0.548	0.5014	0.4809	0.5105	0.0688	0.503	0.503	0.4347	0.5788	0.5685	0.4872	0.535	0.5144	1.2078	1.1949	1.1949	1.1949	0.4119	1.4501	0.5147	0.4119	0.4935	0.4935	0.6625	0.5509	0.5541	0.4409	1.2174
aspglu[c][e]	-0.1492	0.3533	0.3169	0.3169	0.3169	0.3313	0.3313	0.3416	0.3317	0.3173	0.3173	0.4849	0.2906	0.4501	0.3169	0.9052	0.2944	0.3486	1.5384	0.548	0.548	0.548	0.5014	0.4809	0.5102	0.0688	0.503	0.503	0.4347	0.5788	0.5685	0.4872	0.535	0.5144	1.2078	1.1949	1.1949	1.1949	0.4119	1.4501	0.5147	0.4119	0.4935	0.4935	0.6625	0.5509	0.5541	0.4409	1.2174
aspglupro[c][e]	-0.1492	0.3533	0.3169	0.3169	0.3169	0.3317	0.3313	0.3416	0.3317	0.3173	0.3173	0.4849	0.2906	0.4501	0.3169	0.9052	0.2944	0.3486	1.5384	0.548	0.548	0.548	0.5014	0.4809	0.5105	0.0688	0.503	0.503	0.4347	0.5788	0.5685	0.4872	0.535	0.5144	1.2078	1.1949	1.1949	1.1949	0.4119	1.4501	0.5147	0.4119	0.4935	0.4935	0.6625	0.5509	0.5541	0.4409	1.2174
aspglutrp[c][e]	-0.1492	0.3533	0.3169	0.3169	0.3169	0.3317	0.3313	0.3416	0.3317	0.3173	0.3173	0.4849	0.2906	0.4501	0.3169	0.9052	0.2944	0.3486	1.5384	0.548	0.548	0.548	0.5014	0.4809	0.5105	0.0688	0.503	0.503	0.4347	0.5788	0.5685	0.4872	0.535	0.5144	1.2078	1.1949	1.1949	1.1949	0.4119	1.4501	0.5147	0.4119	0.4935	0.4935	0.6625	0.5509	0.5541	0.4409	1.2174
asphiscys[c][e]	-0.1492	0.3529	0.3165	0.3165	0.3165	0.3313	0.331	0.3416	0.3313	0.3169	0.3169	0.4846	0.2903	0.4497	0.3165	0.905	0.294	0.3486	1.5384	0.548	0.548	0.548	0.5014	0.4809	0.5102	0.0683	0.503	0.503	0.4347	0.5788	0.5685	0.4872	0.535	0.5144	1.2078	1.1949	1.1949	1.1949	0.4119	1.4501	0.5147	0.4119	0.4935	0.4935	0.6622	0.5509	0.5537	0.4409	1.2172
asphispro[c][e]	-0.1492	0.3529	0.3165	0.3165	0.3165	0.3313	0.3313	0.3416	0.3313	0.3169	0.3169	0.4846	0.2906	0.4497	0.3165	0.905	0.2944	0.3486	1.5384	0.548	0.548	0.548	0.5014	0.4809	0.5105	0.0683	0.503	0.503	0.4347	0.5788	0.5685	0.4872	0.535	0.5144	1.2078	1.1949	1.1949	1.1949	0.4119	1.4501	0.5147	0.4119	0.4935	0.4935	0.6625	0.5509	0.5541	0.4409	1.2172
asplysglu[c][e]	-0.1492	0.3533	0.3169	0.3169	0.3169	0.3317	0.3313	0.3416	0.3317	0.3173	0.3173	0.4849	0.2906	0.4501	0.3169	0.9052	0.2944	0.3486	1.5384	0.548	0.548	0.548	0.5014	0.4809	0.5105	0.0688	0.503	0.503	0.4347	0.5788	0.5685	0.4872	0.535	0.5144	1.2078	1.1949	1.1949	1.1949	0.4119	1.4501	0.5147	0.4119	0.4935	0.4935	0.6625	0.5509	0.5541	0.4409	1.2174
asplyshis[c][e]	-0.1492	0.3529	0.3169	0.3169	0.3169	0.3313	0.3313	0.3416	0.3317	0.3173	0.3173	0.4846	0.2906	0.4501	0.3169	0.9052	0.2944	0.3486	1.5384	0.548	0.548	0.548	0.5014	0.4809	0.5105	0.0683	0.503	0.503	0.4347	0.5788	0.5685	0.4872	0.535	0.5144	1.2078	1.1949	1.1949	1.1949	0.4119	1.4501	0.5147	0.4119	0.4935	0.4935	0.6625	0.5509	0.5541	0.4409	1.2174
aspmetasp[c][e]	-0.1492	0.3533	0.3169	0.3169	0.3169	0.3317	0.3313	0.3416	0.3317	0.3173	0.3173	0.4849	0.2906	0.4501	0.3169	0.9052	0.2944	0.3486	1.5384	0.548	0.548	0.548	0.5014	0.4809	0.5105	0.0683	0.503	0.503	0.4347	0.5788	0.5685	0.4872	0.535	0.5144	1.2078	1.1949	1.1949	1.1949	0.4119	1.4501	0.5147	0.4119	0.4935	0.4935	0.6625	0.5509	0.5541	0.4409	1.2174
aspprolys[c][e]	-0.1492	0.3529	0.3169	0.3169	0.3169	0.3313	0.3313	0.3416	0.3317	0.3173	0.3173	0.4846	0.2906	0.4501	0.3169	0.9052	0.2944	0.3486	1.5384	0.548	0.548	0.548	0.5014	0.4809	0.5105	0.0683	0.503	0.503	0.4347	0.5788	0.5685	0.4872	0.535	0.5144	1.2078	1.1949	1.1949	1.1949	0.4119	1.4501	0.5147	0.4119	0.4935	0.4935	0.6625	0.5509	0.5541	0.4409	1.2174
aspvalasn[c][e]	-0.1492	0.3533	0.3169	0.3169	0.3169	0.3317	0.3313	0.3416	0.3317	0.3173	0.3173	0.4849	0.2906	0.4501	0.3169	0.9052	0.2944	0.3486	1.5384	0.548	0.548	0.548	0.5014	0.4809	0.5105	0.0688	0.503	0.503	0.4347	0.5788	0.5685	0.4872	0.535	0.5144	1.2078	1.1949	1.1949	1.1949	0.4119	1.4501	0.5147	0.4119	0.4935	0.4935	0.6625	0.5509	0.5541	0.4409	1.2174
atp[c][e][g][m][n][r][x]	-0.2593	-0.3868	-0.3869	-0.3869	-0.3869	-0.3869	-0.3869	-0.3869	-0.3869	-0.3869	-0.3869	-0.3869	-0.3869	-0.3869	-0.3869	-0.3869	-0.3869	-0.3869	0.3763	-0.042	-0.042	-0.042	-0.042	-0.0113	-0.042	-0.3858	-0.042	-0.042	0.1874	-0.042	-0.042	0.3101	-0.042	-0.042	-0.1582	-0.1582	-0.1582	-0.1582	-0.1582	-0.1582	-0.1582	-0.1582	-0.1582	-0.1582	-0.1582	-0.1582	-0.1582	-0.1582	-0.1582
atvacid[c][e][r]	0.7215	0.904	0.9078	0.9078	0.9078	0.9078	0.9078	0.9078	0.9078	0.9078	0.9078	0.9078	0.9078	0.9078	0.9078	0.9079	0.9078	0.9078	0.8556	-0.3061	-0.3061	-0.3061	-0.3061	-0.1846	-0.3061	1.1057	-0.3061	-0.3061	0.4363	-0.3061	-0.3061	0.7171	-0.3061	-0.3061	-0.2867	-0.2861	-0.2861	-0.2861	-0.2862	-0.286	-0.2862	-0.2862	-0.2862	-0.2862	-0.2862	-0.2862	-0.2862	-0.2862	-0.2861
atvlac[c][e][r]	0.4189	0.1222	0.1229	0.1229	0.1229	0.1229	0.1229	0.1229	0.1229	0.1229	0.1229	0.1229	0.1229	0.1229	0.1229	0.1231	0.1229	0.1229	1.3991	0.497	0.497	0.497	0.497	0.5757	0.497	0.0041	0.497	0.497	0.9983	0.497	0.497	1.2806	0.497	0.497	0.4726	0.4727	0.4727	0.4727	0.4724	0.4728	0.4725	0.4724	0.4725	0.4725	0.4725	0.4725	0.4725	0.4724	0.4727
b2coa[m][x]	-10.1939	-11.553	-11.5894	-11.5894	-11.5894	-11.5747	-11.5748	-11.5644	-11.5746	-11.589	-11.589	-11.4214	-11.6157	-11.4562	-11.5894	-11.001	-11.6119	-11.5575	-10.3678	-11.3581	-11.3581	-11.3581	-11.4049	-11.4254	-11.3958	-11.8376	-11.4032	-11.4032	-11.4715	-11.3274	-11.3377	-11.419	-11.3712	-11.3918	-10.6985	-10.7114	-10.7114	-10.7114	-11.4945	-10.4563	-11.3917	-11.4945	-11.4129	-11.4129	-11.2441	-11.3555	-11.3522	-11.4655	-10.6891
betald[c][m]	1.0138	0.5212	0.519	0.519	0.519	0.519	0.519	0.519	0.519	0.519	0.519	0.519	0.519	0.519	0.519	0.519	0.519	0.519	0.5278	0.424	0.424	0.424	0.424	0.4322	0.424	1.171	0.424	0.424	0.5541	0.424	0.424	0.5012	0.424	0.424	0.1989	0.1983	0.1983	0.1983	0.1983	0.1983	0.1983	0.1983	0.1983	0.1983	0.1983	0.1983	0.1983	0.1983	0.1983
bhb[c][e][m]	-1.2032	-0.4344	-0.4334	-0.4334	-0.4334	-0.4334	-0.4334	-0.4334	-0.4334	-0.4334	-0.4334	-0.4334	-0.4334	-0.4334	-0.4334	-0.4333	-0.4334	-0.4334	-1.3237	-1.9534	-1.9534	-1.9534	-1.9535	-1.8946	-1.9534	-0.1667	-1.9534	-1.9534	-1.6184	-1.9534	-1.9534	-1.4027	-1.9534	-1.9534	-2.0465	-2.0467	-2.0467	-2.0467	-2.0473	-2.0464	-2.0472	-2.0473	-2.0472	-2.0472	-2.0471	-2.0472	-2.0472	-2.0473	-2.0467
bildglcur[c][e][r]	0.4189	0.1222	0.1229	0.1229	0.1229	0.1229	0.1229	0.1229	0.1229	0.1229	0.1229	0.1229	0.1229	0.1229	0.1229	0.1231	0.1229	0.1229	1.3991	0.497	0.497	0.497	0.497	0.5757	0.497	0.0041	0.497	0.497	0.9983	0.497	0.497	1.2806	0.497	0.497	0.4726	0.4727	0.4727	0.4727	0.4724	0.4728	0.4725	0.4724	0.4725	0.4725	0.4725	0.4725	0.4725	0.4724	0.4727
bilglcur[c][e][r]	-0.1492	0.3532	0.3169	0.3168	0.3169	0.3313	0.3313	0.3416	0.3316	0.3172	0.3172	0.4848	0.2906	0.4501	0.3169	0.9051	0.2944	0.3486	1.5383	0.5479	0.5479	0.5479	0.5012	0.4808	0.5102	0.0683	0.5029	0.5029	0.4347	0.5787	0.5684	0.4871	0.5349	0.5143	1.2078	1.1949	1.1949	1.1949	0.4119	1.45	0.5146	0.4119	0.4935	0.4935	0.6624	0.5508	0.554	0.4409	1.2174
bilirub[c][e][r]	-14.0129	0.2933	0.294	0.294	0.294	0.294	0.294	0.294	0.294	0.294	0.294	0.294	0.294	0.294	0.294	0.294	0.294	0.294	-0.2411	0.3759	0.3759	0.3759	0.3759	0.3563	0.3759	0.4577	0.3759	0.3759	0.0454	0.3759	0.3759	-0.2203	0.3759	0.3759	0.3931	0.3932	0.3932	0.3932	0.3932	0.3933	0.3932	0.3932	0.3932	0.3932	0.3932	0.3932	0.3932	0.3932	0.3932
biliverd[c][e]	-0.1492	0.3533	0.3169	0.3169	0.3169	0.3317	0.3313	0.3416	0.3317	0.3173	0.3173	0.4849	0.2906	0.4501	0.3169	0.9052	0.2944	0.3486	1.5384	0.548	0.548	0.548	0.5014	0.4809	0.5102	0.0688	0.503	0.503	0.4347	0.5788	0.5685	0.4872	0.535	0.5144	1.2078	1.1949	1.1949	1.1949	0.4119	1.4501	0.5147	0.4119	0.4935	0.4935	0.6625	0.5509	0.5541	0.4409	1.2174
biocyt[c][e][m][n]	-0.1492	0.3533	0.3169	0.3169	0.3169	0.3317	0.3313	0.342	0.3317	0.3173	0.3173	0.4849	0.2906	0.4501	0.3169	0.9052	0.2944	0.3489	1.5385	0.548	0.548	0.548	0.5014	0.4809	0.5105	0.0688	0.503	0.503	0.4347	0.5788	0.5685	0.4872	0.535	0.5144	1.208	1.1951	1.1951	1.1951	0.4119	1.4502	0.5147	0.4119	0.4935	0.4935	0.6625	0.5509	0.5541	0.4409	1.2174
btcoa[c][m][x]	-7.0749	-7.1071	-7.0683	-7.0683	-7.0683	-7.0681	-7.0681	-7.068	-7.0681	-7.0683	-7.0683	-7.0658	-7.0687	-7.0664	-7.0683	-7.0582	-7.0686	-7.0679	-9.4391	-10.5034	-10.5034	-10.5034	-10.5335	-10.5141	-10.5276	-6.1263	-10.5324	-10.5324	-10.3126	-10.4834	-10.49	-10.1357	-10.5119	-10.5252	-10.0819	-10.0337	-10.0337	-10.0337	-10.6385	-9.806	-10.5713	-10.6385	-10.5853	-10.5853	-10.4725	-10.5474	-10.5454	-10.6197	-10.0142
btn[c][e][m][n]	-6.0892	4.1962	4.203	4.203	4.203	4.203	4.203	4.203	4.203	4.203	4.203	4.2031	4.203	4.2031	4.203	4.2035	4.203	4.203	-4.4026	-5.3936	-5.3936	-5.3936	-5.4403	-5.461	-5.4312	4.287	-5.4387	-5.4387	-5.5075	-5.363	-5.3732	-5.4542	-5.4067	-5.4273	-4.733	-4.7459	-4.7459	-4.7459	-5.529	-4.4908	-5.4264	-5.529	-5.4475	-5.4475	-5.2787	-5.3905	-5.3874	-5.5001	-4.7236
but[c][e][m]	0.1113	-0.2989	-0.2979	-0.2979	-0.2979	-0.2979	-0.2979	-0.2979	-0.2979	-0.2979	-0.2979	-0.2979	-0.2979	-0.2979	-0.2979	-0.2979	-0.2979	-0.2979	-0.1411	-1.2081	-1.2081	-1.2081	-1.2081	-1.089	-1.2081	-0.0068	-1.2081	-1.2081	-0.5127	-1.2081	-1.2081	-0.25	-1.2081	-1.2081	-1.2474	-1.2473	-1.2473	-1.2473	-1.2474	-1.2472	-1.2474	-1.2474	-1.2474	-1.2474	-1.2473	-1.2474	-1.2474	-1.2474	-1.2473
C01601[c][e]	-0.1492	0.3533	0.3169	0.3169	0.3169	0.3317	0.3313	0.3416	0.3317	0.3173	0.3173	0.4849	0.2906	0.4501	0.3169	0.9052	0.2944	0.3486	1.5384	0.548	0.548	0.548	0.5014	0.4809	0.5105	0.0688	0.503	0.503	0.4347	0.5788	0.5685	0.4872	0.535	0.5144	1.2078	1.1949	1.1949	1.1949	0.4119	1.4501	0.5147	0.4119	0.4935	0.4935	0.6625	0.5509	0.5541	0.4409	1.2174
C02356[c][e]	-0.1492	0.3533	0.3169	0.3169	0.3169	0.3317	0.3313	0.3416	0.3317	0.3173	0.3173	0.4849	0.2906	0.4501	0.3169	0.9052	0.2944	0.3486	1.5384	0.548	0.548	0.548	0.5014	0.4809	0.5105	0.0683	0.503	0.503	0.4347	0.5788	0.5685	0.4872	0.535	0.5144	1.208	1.1951	1.1951	1.1951	0.4123	1.4502	0.5147	0.4123	0.4938	0.4938	0.6625	0.5509	0.5541	0.4412	1.2176
C02470[c]	-0.149	0.3532	0.3167	0.3167	0.3167	0.3315	0.3315	0.3417	0.3316	0.3172	0.3172	0.4847	0.2907	0.4499	0.3167	0.9052	0.2944	0.3485	1.5384	0.5476	0.5476	0.5476	0.5009	0.4809	0.5101	0.0687	0.5026	0.5026	0.4347	0.5785	0.5682	0.4871	0.5346	0.514	1.2077	1.1948	1.1948	1.1948	0.4118	1.4499	0.5145	0.4118	0.4933	0.4933	0.6623	0.5506	0.5537	0.4406	1.2171
C02528[c][r]	-0.1492	0.3529	0.3169	0.3169	0.3169	0.3313	0.3313	0.3416	0.3317	0.3169	0.3169	0.4846	0.2906	0.4501	0.3169	0.905	0.2944	0.3486	1.5384	0.5477	0.5477	0.5477	0.501	0.4809	0.5102	0.0683	0.503	0.503	0.4347	0.5788	0.5685	0.4872	0.5347	0.5144	1.2078	1.1949	1.1949	1.1949	0.4119	1.4499	0.5147	0.4119	0.4935	0.4935	0.6622	0.5509	0.5537	0.4409	1.2172
C02712[c]	-0.6087	-2.1224	-2.1388	-2.1388	-2.1388	-2.1388	-2.1388	-2.1388	-2.1388	-2.1388	-2.1388	-2.1388	-2.1388	-2.1388	-2.1388	-2.1388	-2.1388	-2.1388	-11.9332	-0.6558	-0.6558	-0.6558	-0.6558	-0.6913	-0.6558	-2.4774	-0.6558	-0.6558	-13.0379	-0.6558	-0.6558	-12.9847	-0.6558	-0.6558	-0.8436	-0.844	-0.844	-0.844	-0.844	-0.844	-0.844	-0.844	-0.844	-0.844	-0.844	-0.844	-0.844	-0.844	-0.844
C04717[c][e]	-0.1492	0.3533	0.3169	0.3169	0.3169	0.3317	0.3313	0.3416	0.3317	0.3173	0.3173	0.4849	0.2906	0.4501	0.3169	0.9052	0.2944	0.3486	1.5384	0.548	0.548	0.548	0.5014	0.4809	0.5105	0.0688	0.503	0.503	0.4347	0.5788	0.5685	0.4872	0.535	0.5144	1.2078	1.1949	1.1949	1.1949	0.4119	1.4501	0.5147	0.4119	0.4935	0.4935	0.6625	0.5509	0.5541	0.4409	1.2174
C04805[c][e][m]	-0.1484	0.3534	0.317	0.317	0.317	0.3317	0.3316	0.342	0.3318	0.3172	0.3172	0.4851	0.2908	0.4503	0.317	0.9055	0.2946	0.3486	1.5381	0.5463	0.5463	0.5463	0.4998	0.4801	0.5089	0.0692	0.5014	0.5014	0.4342	0.5777	0.5674	0.4864	0.5334	0.5128	1.2072	1.1943	1.1943	1.1943	0.4112	1.4493	0.514	0.4112	0.4927	0.4927	0.6614	0.5501	0.5532	0.44	1.2166
C05109[c]	-2.1478	0.3535	0.3171	0.3171	0.3171	0.3316	0.3315	0.3418	0.3319	0.3175	0.3175	0.4855	0.2908	0.4504	0.3171	0.9057	0.2946	0.3488	1.5383	0.5467	0.5467	0.5467	0.5001	0.4806	0.5094	0.0693	0.5018	0.5018	0.4343	0.578	0.5676	0.4868	0.5337	0.5132	1.2074	1.1944	1.1944	1.1944	0.4113	1.4495	0.5142	0.4113	0.4929	0.4929	0.6621	0.5503	0.5534	0.4403	1.2168
C05279[m][x]	1.8811	0.3533	0.3169	0.3169	0.3169	0.3316	0.3313	0.3416	0.3317	0.3173	0.3173	0.4849	0.2906	0.4501	0.3169	0.9052	0.2944	0.3486	1.5384	0.548	0.548	0.548	0.5014	0.4809	0.5105	0.0686	0.503	0.503	0.4347	0.5788	0.5685	0.4872	0.535	0.5144	1.2078	1.1949	1.1949	1.1949	0.4119	1.4501	0.5147	0.4119	0.4935	0.4935	0.6625	0.5509	0.5541	0.4409	1.2174
C05280[m][x]	1.8811	0.3533	0.3169	0.3169	0.3169	0.3317	0.3313	0.3416	0.3317	0.3173	0.3173	0.4849	0.2906	0.4501	0.3169	0.9052	0.2944	0.3486	1.5384	0.548	0.548	0.548	0.5014	0.4809	0.5105	0.0688	0.503	0.503	0.4347	0.5788	0.5685	0.4872	0.535	0.5144	1.2078	1.1949	1.1949	1.1949	0.4119	1.4501	0.5147	0.4119	0.4935	0.4935	0.6625	0.5509	0.5541	0.4409	1.2174
C05767[c][e]	-0.1492	0.3533	0.3169	0.3169	0.3169	0.3313	0.3313	0.3416	0.3317	0.3173	0.3173	0.4849	0.2906	0.4501	0.3169	0.9052	0.2944	0.3486	1.5384	0.548	0.548	0.548	0.5014	0.4809	0.5105	0.0688	0.503	0.503	0.4347	0.5788	0.5685	0.4872	0.535	0.5144	1.2078	1.1949	1.1949	1.1949	0.4119	1.4501	0.5147	0.4119	0.4935	0.4935	0.6625	0.5509	0.5541	0.4409	1.2172
C05769[c][e]	-0.1492	0.3533	0.3169	0.3169	0.3169	0.3313	0.3313	0.3416	0.3317	0.3173	0.3173	0.4849	0.2906	0.4501	0.3169	0.9052	0.2944	0.3486	1.5384	0.548	0.548	0.548	0.501	0.4809	0.5102	0.0683	0.503	0.503	0.4347	0.5788	0.5685	0.4872	0.535	0.5144	1.2078	1.1949	1.1949	1.1949	0.4119	1.4501	0.5147	0.4119	0.4935	0.4935	0.6625	0.5509	0.5541	0.4409	1.2172
C05770[c][e]	0	0	0	0	0	0	0	0	0	0	0	0	0	0	0	0	0	0	0	0	0	0	0	0	0	0	0	0	0	0	0	0	0	0	0	0	0	0	0	0	0	0	0	0	0	0	0	0	0
C05957[c][e]	-1.021	-3.5262	-3.4366	-3.4366	-3.4366	-3.4365	-3.4365	-3.4365	-3.4365	-3.4366	-3.4366	-3.4363	-3.4366	-3.4364	-3.4366	-3.4356	-3.4366	-3.4365	1.663	0.4512	0.4512	0.4512	0.4512	0.6098	0.4512	-1.6097	0.4512	0.4512	1.2752	0.4512	0.4512	1.5366	0.4512	0.4512	0.2426	0.2431	0.2431	0.2431	0.243	0.2431	0.243	0.243	0.243	0.243	0.243	0.243	0.243	0.243	0.2431
C07297[x]	-0.1492	0.3533	0.3169	0.3169	0.3169	0.3313	0.3313	0.3416	0.3317	0.3173	0.3173	0.4849	0.2906	0.4501	0.3169	0.9052	0.2944	0.3486	1.5384	0.548	0.548	0.548	0.5014	0.4809	0.5102	0.0683	0.503	0.503	0.4347	0.5788	0.5685	0.4872	0.535	0.5144	1.2078	1.1949	1.1949	1.1949	0.4119	1.4501	0.5147	0.4119	0.4935	0.4935	0.6625	0.5509	0.5541	0.4409	1.2174
C08261[c]	-0.1492	0.3533	0.3169	0.3169	0.3169	0.3317	0.3313	0.3416	0.3317	0.3173	0.3173	0.4849	0.2906	0.4501	0.3169	0.9052	0.2944	0.3486	1.5384	0.548	0.548	0.548	0.5014	0.4809	0.5105	0.0688	0.503	0.503	0.4347	0.5788	0.5685	0.4872	0.535	0.5144	1.2078	1.1949	1.1949	1.1949	0.4119	1.4501	0.5147	0.4119	0.4935	0.4935	0.6625	0.5509	0.5541	0.4409	1.2174
c101coa[c]	-0.1492	0.3533	0.3169	0.3169	0.3169	0.3313	0.3313	0.3416	0.3317	0.3173	0.3173	0.4849	0.2906	0.4501	0.3169	0.9052	0.2944	0.3486	1.5384	0.548	0.548	0.548	0.5014	0.4809	0.5105	0.0688	0.503	0.503	0.4347	0.5788	0.5685	0.4872	0.535	0.5144	1.2078	1.1949	1.1949	1.1949	0.4119	1.4501	0.5147	0.4119	0.4935	0.4935	0.6625	0.5509	0.5541	0.4409	1.2174
c101crn[c][e]	-0.1492	0.3533	0.3169	0.3169	0.3169	0.3313	0.3313	0.3416	0.3317	0.3173	0.3173	0.4849	0.2906	0.4501	0.3169	0.9052	0.2944	0.3486	1.5384	0.548	0.548	0.548	0.5014	0.4809	0.5105	0.0688	0.503	0.503	0.4347	0.5788	0.5685	0.4872	0.535	0.5144	1.2078	1.1949	1.1949	1.1949	0.4119	1.4501	0.5147	0.4119	0.4935	0.4935	0.6625	0.5509	0.5541	0.4409	1.2174
c10crn[c][e]	-0.1492	0.3533	0.3169	0.3169	0.3169	0.3313	0.3313	0.3416	0.3317	0.3173	0.3173	0.4849	0.2906	0.4501	0.3169	0.9052	0.2944	0.3486	1.5384	0.548	0.548	0.548	0.5014	0.4809	0.5102	0.0688	0.503	0.503	0.4347	0.5788	0.5685	0.4872	0.535	0.5144	1.2078	1.1949	1.1949	1.1949	0.4119	1.4501	0.5147	0.4119	0.4935	0.4935	0.6625	0.5509	0.5541	0.4409	1.2172
c10dc[c][e][x]	-0.1492	0.3533	0.3169	0.3169	0.3169	0.3316	0.3313	0.3416	0.3317	0.3173	0.3173	0.4849	0.2906	0.4501	0.3169	0.9052	0.2944	0.3486	1.5384	0.548	0.548	0.548	0.5014	0.4809	0.5105	0.0684	0.503	0.503	0.4347	0.5788	0.5685	0.4872	0.535	0.5144	1.2078	1.1949	1.1949	1.1949	0.4119	1.4501	0.5147	0.4119	0.4935	0.4935	0.6625	0.5509	0.5541	0.4409	1.2174
C11821[c]	-0.1492	0.3533	0.3169	0.3169	0.3169	0.3313	0.3313	0.3416	0.3317	0.3173	0.3173	0.4849	0.2906	0.4501	0.3169	0.9052	0.2944	0.3486	1.5384	0.548	0.548	0.548	0.501	0.4809	0.5102	0.0683	0.503	0.503	0.4347	0.5788	0.5685	0.4872	0.535	0.5144	1.2078	1.1949	1.1949	1.1949	0.4119	1.4501	0.5147	0.4119	0.4935	0.4935	0.6625	0.5509	0.5537	0.4409	1.2172
c12dc[c][e][x]	-0.1492	0.3533	0.3169	0.3169	0.3169	0.3316	0.3313	0.3416	0.3317	0.3173	0.3173	0.4849	0.2906	0.4501	0.3169	0.9052	0.2944	0.3486	1.5384	0.548	0.548	0.548	0.5014	0.4809	0.5105	0.0688	0.503	0.503	0.4347	0.5788	0.5685	0.4872	0.535	0.5144	1.2078	1.1949	1.1949	1.1949	0.4119	1.4501	0.5147	0.4119	0.4935	0.4935	0.6625	0.5509	0.5541	0.4409	1.2174
c12dccoa[c][x]	-0.1492	0.3533	0.3169	0.3169	0.3169	0.3315	0.3313	0.3416	0.3317	0.3173	0.3173	0.4849	0.2906	0.4501	0.3169	0.9052	0.2944	0.3486	1.5384	0.548	0.548	0.548	0.5014	0.4809	0.5105	0.0688	0.503	0.503	0.4347	0.5788	0.5685	0.4872	0.535	0.5144	1.2078	1.1949	1.1949	1.1949	0.4119	1.4501	0.5147	0.4119	0.4935	0.4935	0.6625	0.5509	0.5541	0.4409	1.2174
C13856[c][e]	-0.1492	0.3533	0.3169	0.3169	0.3169	0.3313	0.3313	0.3416	0.3317	0.3173	0.3173	0.4849	0.2906	0.4501	0.3169	0.9052	0.2944	0.3486	1.5384	0.548	0.548	0.548	0.5014	0.4809	0.5102	0.0688	0.503	0.503	0.4347	0.5788	0.5685	0.4872	0.535	0.5144	1.2078	1.1949	1.1949	1.1949	0.4119	1.4501	0.5147	0.4119	0.4935	0.4935	0.6625	0.5509	0.5541	0.4409	1.2174
C14768[c][e]	-0.1492	0.3533	0.3169	0.3169	0.3169	0.3317	0.3313	0.3416	0.3317	0.3173	0.3173	0.4849	0.2906	0.4501	0.3169	0.9052	0.2944	0.3486	1.5384	0.548	0.548	0.548	0.5014	0.4809	0.5105	0.0688	0.503	0.503	0.4347	0.5788	0.5685	0.4872	0.535	0.5144	1.2078	1.1949	1.1949	1.1949	0.4119	1.4501	0.5147	0.4119	0.4935	0.4935	0.6625	0.5509	0.5541	0.4409	1.2174
C14769[c][e]	-0.1492	0.3533	0.3169	0.3169	0.3169	0.3317	0.3313	0.3416	0.3317	0.3173	0.3173	0.4849	0.2906	0.4501	0.3169	0.9052	0.2944	0.3486	1.5384	0.548	0.548	0.548	0.5014	0.4809	0.5105	0.0688	0.503	0.503	0.4347	0.5788	0.5685	0.4872	0.535	0.5144	1.2078	1.1949	1.1949	1.1949	0.4119	1.4501	0.5147	0.4119	0.4935	0.4935	0.6625	0.5509	0.5541	0.4409	1.2174
C14826[c][e]	-0.1492	0.3533	0.3169	0.3169	0.3169	0.3317	0.3313	0.342	0.3317	0.3173	0.3173	0.4849	0.2906	0.4501	0.3169	0.9052	0.2944	0.3489	1.5385	0.548	0.548	0.548	0.5014	0.4809	0.5105	0.0688	0.503	0.503	0.4347	0.5788	0.5685	0.4872	0.535	0.5144	1.2078	1.1951	1.1951	1.1951	0.4119	1.4501	0.5147	0.4119	0.4935	0.4935	0.6625	0.5509	0.5541	0.4409	1.2174
c16dc[c][e]	-0.1492	0.3529	0.3169	0.3169	0.3169	0.3313	0.3313	0.3416	0.3317	0.3173	0.3173	0.4849	0.2906	0.4501	0.3169	0.9052	0.2944	0.3486	1.5384	0.548	0.548	0.548	0.501	0.4809	0.5102	0.0683	0.503	0.503	0.4347	0.5788	0.5685	0.4872	0.5347	0.5144	1.2078	1.1949	1.1949	1.1949	0.4119	1.4499	0.5147	0.4119	0.4935	0.4935	0.6625	0.5509	0.5537	0.4409	1.2172
c226coa[c][m][r][x]	-0.1492	0.3529	0.3169	0.3165	0.3169	0.3313	0.3313	0.3416	0.3313	0.3169	0.3169	0.4849	0.2906	0.4501	0.3169	0.905	0.2944	0.3486	1.5384	0.548	0.548	0.548	0.501	0.4809	0.5102	0.0683	0.503	0.503	0.4347	0.5788	0.5685	0.4872	0.535	0.5144	1.2078	1.1949	1.1949	1.1949	0.4119	1.4499	0.5144	0.4119	0.4931	0.4931	0.6625	0.5506	0.5537	0.4405	1.2172
c226crn[c][m]	2.5136	0.3543	0.3177	0.3177	0.3177	0.3326	0.3322	0.3427	0.3326	0.3181	0.3181	0.4839	0.2918	0.4507	0.3177	0.9043	0.2956	0.3494	1.7383	1.2708	1.2708	1.2708	1.2462	1.2789	1.2509	0.0675	1.247	1.247	1.5611	1.2876	1.2821	1.7766	1.2639	1.253	1.554	1.6632	1.6632	1.6632	1.1359	1.8687	1.1921	1.1359	1.1804	1.1804	1.277	1.2123	1.214	1.1515	1.6808
c3dc[c][e]	-0.1492	0.3533	0.3169	0.3169	0.3169	0.3313	0.3313	0.3416	0.3317	0.3173	0.3173	0.4849	0.2906	0.4501	0.3169	0.9052	0.2944	0.3486	1.5384	0.5477	0.5477	0.5477	0.501	0.4809	0.5102	0.0683	0.503	0.503	0.4347	0.5788	0.5685	0.4872	0.5347	0.5144	1.2078	1.1949	1.1949	1.1949	0.4119	1.4501	0.5147	0.4119	0.4935	0.4935	0.6625	0.5509	0.5541	0.4409	1.2172
c4crn[c][e][m][x]	-4.6494	-3.7564	-3.9259	-3.9259	-3.9259	-3.9254	-3.9254	-3.9251	-3.9254	-3.9258	-3.9258	-3.9208	-3.9266	-3.9219	-3.9259	-3.9055	-3.9265	-3.925	-6.0815	-7.5949	-7.5949	-7.5949	-7.6454	-7.6749	-7.6354	-2.8622	-7.6435	-7.6435	-7.7806	-7.5617	-7.5725	-7.7446	-7.609	-7.6312	-6.7326	-6.8538	-6.8538	-6.8538	-7.7306	-6.5607	-7.6208	-7.7306	-7.6433	-7.6433	-7.4663	-7.5826	-7.5795	-7.6995	-6.828
c4dc[c][e][x]	-0.1492	0.3533	0.3169	0.3169	0.3169	0.3316	0.3313	0.3419	0.3317	0.3173	0.3173	0.4848	0.2906	0.4501	0.3169	0.9052	0.2944	0.3488	1.5384	0.548	0.548	0.548	0.501	0.4809	0.5102	0.0683	0.5029	0.5029	0.4347	0.5787	0.5685	0.4869	0.5349	0.5143	1.2081	1.1952	1.1952	1.1952	0.4122	1.4503	0.515	0.4122	0.4937	0.4937	0.6625	0.5509	0.554	0.4411	1.2176
c51crn[c][e]	-0.1492	0.3533	0.3169	0.3169	0.3169	0.3317	0.3313	0.3416	0.3317	0.3173	0.3173	0.4849	0.2906	0.4501	0.3169	0.9052	0.2944	0.3486	1.5384	0.548	0.548	0.548	0.5014	0.4809	0.5105	0.0688	0.503	0.503	0.4347	0.5788	0.5685	0.4872	0.535	0.5144	1.2078	1.1949	1.1949	1.1949	0.4119	1.4501	0.5147	0.4119	0.4935	0.4935	0.6625	0.5509	0.5541	0.4409	1.2174
c5dc[c][e]	-0.1492	0.3533	0.3169	0.3169	0.3169	0.3317	0.3313	0.3416	0.3317	0.3173	0.3173	0.4849	0.2906	0.4501	0.3169	0.9052	0.2944	0.3486	1.5384	0.548	0.548	0.548	0.5014	0.4809	0.5105	0.0688	0.503	0.503	0.4347	0.5788	0.5685	0.4872	0.535	0.5144	1.2078	1.1949	1.1949	1.1949	0.4119	1.4501	0.5147	0.4119	0.4935	0.4935	0.6625	0.5509	0.5541	0.4409	1.2174
c6crn[c][e][x]	1.0844	1.5395	1.8031	1.8031	1.8031	1.8031	1.8031	1.8031	1.8031	1.8031	1.8031	1.8031	1.8031	1.8031	1.8031	1.8031	1.8031	1.8031	-1.605	1.9359	1.9359	1.9359	1.9359	1.8651	1.9359	2.3445	1.9359	1.9359	1.3897	1.9359	1.9359	0.6587	1.9359	1.9359	1.6234	1.7333	1.7333	1.7333	1.7334	1.7333	1.7334	1.7334	1.7334	1.7334	1.7334	1.7334	1.7334	1.7334	1.7333
c6dc[c][e][x]	-0.1492	0.3533	0.3169	0.3169	0.3169	0.3316	0.3313	0.3416	0.3317	0.3173	0.3173	0.4849	0.2906	0.4501	0.3169	0.9052	0.2944	0.3486	1.5384	0.548	0.548	0.548	0.5014	0.4809	0.5102	0.0688	0.503	0.503	0.4347	0.5788	0.5685	0.4872	0.535	0.5144	1.2078	1.1949	1.1949	1.1949	0.4119	1.4501	0.5147	0.4119	0.4935	0.4935	0.6625	0.5509	0.5541	0.4409	1.2174
c81coa[c]	-0.1492	0.3533	0.3169	0.3169	0.3169	0.3313	0.3313	0.3416	0.3317	0.3173	0.3173	0.4849	0.2906	0.4501	0.3169	0.9052	0.2944	0.3486	1.5384	0.548	0.548	0.548	0.5014	0.4809	0.5105	0.0688	0.503	0.503	0.4347	0.5788	0.5685	0.4872	0.535	0.5144	1.2078	1.1949	1.1949	1.1949	0.4119	1.4501	0.5147	0.4119	0.4935	0.4935	0.6625	0.5509	0.5541	0.4409	1.2174
c81crn[c][e]	-0.1492	0.3533	0.3169	0.3169	0.3169	0.3313	0.3313	0.3416	0.3317	0.3173	0.3173	0.4849	0.2906	0.4501	0.3169	0.9052	0.2944	0.3486	1.5384	0.548	0.548	0.548	0.5014	0.4809	0.5105	0.0688	0.503	0.503	0.4347	0.5788	0.5685	0.4872	0.535	0.5144	1.2078	1.1949	1.1949	1.1949	0.4119	1.4501	0.5147	0.4119	0.4935	0.4935	0.6625	0.5509	0.5541	0.4409	1.2174
c8crn[c][m][x]	-0.1403	0.3544	0.3189	0.3189	0.3189	0.3338	0.3338	0.3441	0.3338	0.3193	0.3193	0.4866	0.2926	0.452	0.3189	0.9069	0.2964	0.3507	5.8199	0.5485	0.5485	0.5485	0.5018	0.4806	0.511	0.0727	0.5035	0.5035	0.4338	0.5794	0.569	0.4866	0.5353	0.5149	1.2104	1.1968	1.1968	1.1968	0.4126	1.4513	0.5156	0.4126	0.4943	0.4943	0.6668	0.5532	0.5564	0.4414	1.2192
c8dc[c][e][x]	-0.1492	0.3533	0.3169	0.3169	0.3169	0.3316	0.3313	0.3416	0.3317	0.3173	0.3173	0.4849	0.2906	0.4501	0.3169	0.9052	0.2944	0.3486	1.5384	0.548	0.548	0.548	0.5014	0.4809	0.5104	0.0688	0.503	0.503	0.4347	0.5788	0.5685	0.4872	0.535	0.5144	1.2078	1.1949	1.1949	1.1949	0.4119	1.4501	0.5147	0.4119	0.4935	0.4935	0.6625	0.5509	0.5541	0.4409	1.2174
ca2[c][e]	0.4943	0.0069	0.0071	0.0071	0.0071	0.0071	0.0071	0.0071	0.0071	0.0071	0.0071	0.0071	0.0071	0.0071	0.0071	0.0071	0.0071	0.0071	1.4661	0.7843	0.7843	0.7843	0.7843	0.8504	0.7843	-0.3858	0.7843	0.7843	1.1517	0.7843	0.7843	1.3743	0.7843	0.7843	0.6978	0.6978	0.6978	0.6978	0.6978	0.6978	0.6978	0.6978	0.6978	0.6978	0.6978	0.6978	0.6978	0.6978	0.6978
ca24g[c][e][r]	-0.1492	0.3533	0.3169	0.3169	0.3169	0.3313	0.3313	0.3416	0.3317	0.3173	0.3173	0.4849	0.2906	0.4501	0.3169	0.9052	0.2944	0.3486	1.5384	0.548	0.548	0.548	0.501	0.4809	0.5102	0.0683	0.503	0.503	0.4347	0.5788	0.5685	0.4872	0.535	0.5144	1.2078	1.1949	1.1949	1.1949	0.4119	1.4501	0.5147	0.4119	0.4935	0.4935	0.6625	0.5509	0.5541	0.4409	1.2174
ca3s[c][e]	-0.1492	0.3533	0.3169	0.3169	0.3169	0.3313	0.3313	0.3416	0.3317	0.3173	0.3173	0.4849	0.2906	0.4501	0.3169	0.9052	0.2944	0.3486	1.5384	0.548	0.548	0.548	0.5014	0.4809	0.5102	0.0683	0.503	0.503	0.4347	0.5788	0.5685	0.4872	0.535	0.5144	1.2078	1.1949	1.1949	1.1949	0.4119	1.4501	0.5147	0.4119	0.4935	0.4935	0.6625	0.5509	0.5541	0.4409	1.2172
caproic[c][e]	-0.1497	0.3532	0.3168	0.3168	0.3168	0.3316	0.3313	0.3419	0.3316	0.3172	0.3172	0.4844	0.2906	0.4499	0.3168	0.905	0.2943	0.3485	1.538	0.5479	0.5479	0.5479	0.5012	0.4805	0.51	0.0683	0.5029	0.5029	0.4346	0.5786	0.5683	0.4867	0.5349	0.5142	1.208	1.1951	1.1951	1.1951	0.4121	1.4501	0.5149	0.4121	0.4937	0.4937	0.6626	0.5508	0.5539	0.4411	1.2174
carn[c][e]	-0.1492	0.3533	0.3169	0.3169	0.3169	0.3317	0.3313	0.3416	0.3317	0.3173	0.3173	0.4849	0.2906	0.4501	0.3169	0.9052	0.2944	0.3486	1.5384	0.548	0.548	0.548	0.5014	0.4809	0.5105	0.0688	0.503	0.503	0.4347	0.5788	0.5685	0.4872	0.535	0.5144	1.2078	1.1949	1.1949	1.1949	0.4119	1.4501	0.5147	0.4119	0.4935	0.4935	0.6625	0.5509	0.5541	0.4409	1.2174
caro[c][e]	-0.1492	0.3533	0.3169	0.3169	0.3169	0.3317	0.3313	0.3416	0.3317	0.3173	0.3173	0.4849	0.2906	0.4501	0.3169	0.9052	0.2944	0.3486	1.5385	0.548	0.548	0.548	0.5014	0.4809	0.5105	0.0688	0.503	0.503	0.4347	0.5788	0.5685	0.4872	0.535	0.5144	1.2078	1.1949	1.1949	1.1949	0.4119	1.4501	0.5147	0.4119	0.4935	0.4935	0.6625	0.5509	0.5541	0.4409	1.2174
cbasp[c][e]	5.3703	0.3533	0.3169	0.3169	0.3169	0.3313	0.3313	0.3416	0.3317	0.3173	0.3173	0.4849	0.2906	0.4501	0.3169	0.9052	0.2944	0.3486	1.5384	0.548	0.548	0.548	0.5014	0.4809	0.5105	0.0684	0.503	0.503	0.4347	0.5788	0.5685	0.4872	0.535	0.5144	1.2078	1.1949	1.1949	1.1949	0.4119	1.4501	0.5147	0.4119	0.4935	0.4935	0.6625	0.5509	0.5541	0.4409	1.2173
cbp[c][r]	5.3782	0.3531	0.3169	0.3169	0.3169	0.3313	0.3313	0.3416	0.3317	0.3173	0.3173	0.4849	0.2906	0.4501	0.3169	0.9052	0.2944	0.3486	1.5384	0.548	0.548	0.548	0.5014	0.4809	0.5105	0.0685	0.503	0.503	0.4347	0.5788	0.5685	0.4872	0.535	0.5144	1.2078	1.1949	1.1949	1.1949	0.4119	1.4501	0.5147	0.4119	0.4935	0.4935	0.6625	0.5509	0.5541	0.4409	1.2173
cdca24g[c][e][r]	-0.1492	0.3533	0.3169	0.3169	0.3169	0.3313	0.3313	0.3416	0.3317	0.3173	0.3173	0.4849	0.2906	0.4501	0.3169	0.9052	0.2944	0.3486	1.5384	0.548	0.548	0.548	0.5014	0.4809	0.5105	0.0688	0.503	0.503	0.4347	0.5788	0.5685	0.4872	0.535	0.5144	1.2078	1.1949	1.1949	1.1949	0.4119	1.4501	0.5147	0.4119	0.4935	0.4935	0.6625	0.5509	0.5541	0.4409	1.2174
cdca3g[c][e][r]	-0.1492	0.3533	0.3169	0.3169	0.3169	0.3313	0.3313	0.3416	0.3317	0.3173	0.3173	0.4849	0.2906	0.4501	0.3169	0.9052	0.2944	0.3486	1.5384	0.548	0.548	0.548	0.5014	0.4809	0.5105	0.0688	0.503	0.503	0.4347	0.5788	0.5685	0.4872	0.535	0.5144	1.2078	1.1949	1.1949	1.1949	0.4119	1.4501	0.5147	0.4119	0.4935	0.4935	0.6625	0.5509	0.5541	0.4409	1.2174
cdp[c][e][m][n]	-0.2824	-0.4451	-0.4451	-0.4451	-0.4451	-0.4451	-0.4451	-0.4451	-0.4451	-0.4451	-0.4451	-0.4451	-0.4451	-0.4451	-0.4451	-0.445	-0.4451	-0.4451	1.1635	-0.3426	-0.3426	-0.3426	-0.3426	-0.2039	-0.3426	-0.022	-0.3426	-0.3426	0.6042	-0.3426	-0.3426	1.0006	-0.3426	-0.3426	-0.6202	-0.6202	-0.6202	-0.6202	-0.6203	-0.6201	-0.6203	-0.6203	-0.6203	-0.6203	-0.6203	-0.6203	-0.6203	-0.6203	-0.6202
cdpchol[c][r]	-0.1492	0.3533	0.3169	0.3169	0.3169	0.3313	0.3313	0.3416	0.3317	0.3173	0.3173	0.4849	0.2906	0.4501	0.3169	0.9052	0.2944	0.3486	1.5384	0.548	0.548	0.548	0.5014	0.4809	0.5105	0.0688	0.503	0.503	0.4347	0.5788	0.5685	0.4872	0.535	0.5144	1.2078	1.1949	1.1949	1.1949	0.4119	1.4501	0.5147	0.4119	0.4935	0.4935	0.6625	0.5509	0.5541	0.4409	1.2174
cdpdag_hs[c][m]	-9.3479	-12.8666	-12.903	-12.903	-12.903	-12.8882	-12.8884	-12.8782	-12.8882	-12.9026	-12.9026	-12.7349	-12.9291	-12.7697	-12.903	-12.3146	-12.9253	-12.8712	-11.6822	-12.6737	-12.6737	-12.6737	-12.7205	-12.7398	-12.7113	-13.1513	-12.7186	-12.7186	-12.7868	-12.641	-12.6528	-12.7328	-12.6866	-12.7072	-12.0117	-12.0244	-12.0244	-12.0244	-12.8076	-11.7695	-12.7048	-12.8076	-12.7261	-12.7261	-12.5571	-12.6689	-12.6655	-12.7787	-12.0022
CE0074[c][e]	-0.1492	0.3533	0.3169	0.3169	0.3169	0.3313	0.3313	0.3416	0.3317	0.3173	0.3173	0.4849	0.2906	0.4501	0.3169	0.9052	0.2944	0.3486	1.5384	0.548	0.548	0.548	0.5014	0.4809	0.5102	0.0683	0.503	0.503	0.4347	0.5788	0.5685	0.4872	0.535	0.5144	1.2078	1.1949	1.1949	1.1949	0.4119	1.4501	0.5147	0.4119	0.4935	0.4935	0.6625	0.5509	0.5541	0.4409	1.2172
CE0693[m][x]	1.8811	0.3533	0.3169	0.3169	0.3169	0.3315	0.3313	0.3416	0.3317	0.3173	0.3173	0.4849	0.2906	0.4501	0.3169	0.9052	0.2944	0.3486	1.5384	0.548	0.548	0.548	0.5014	0.4809	0.5105	0.0685	0.503	0.503	0.4347	0.5788	0.5685	0.4872	0.535	0.5144	1.2078	1.1949	1.1949	1.1949	0.4119	1.4501	0.5147	0.4119	0.4935	0.4935	0.6625	0.5509	0.5541	0.4409	1.2174
CE0713[m][x]	2.2952	0.3533	0.3169	0.3169	0.3169	0.3313	0.3313	0.3416	0.3317	0.3173	0.3173	0.4849	0.2906	0.4501	0.3169	0.9052	0.2944	0.3486	1.5384	0.548	0.548	0.548	0.5014	0.4809	0.5104	0.0686	0.503	0.503	0.4347	0.5788	0.5685	0.4872	0.535	0.5144	1.2078	1.1949	1.1949	1.1949	0.4119	1.4501	0.5147	0.4119	0.4935	0.4935	0.6625	0.5509	0.5541	0.4409	1.2174
CE0785[m][x]	2.2956	0.3532	0.3168	0.3168	0.3168	0.3315	0.3313	0.3415	0.3316	0.3172	0.3172	0.4848	0.2905	0.4499	0.3168	0.9051	0.2943	0.3484	1.5383	0.5478	0.5478	0.5478	0.5011	0.4808	0.5103	0.0685	0.5028	0.5028	0.4346	0.5787	0.5684	0.4871	0.5348	0.5142	1.2077	1.1948	1.1948	1.1948	0.4118	1.4499	0.5145	0.4118	0.4933	0.4933	0.6623	0.5507	0.5538	0.4408	1.2172
CE0849[m][x]	1.8811	0.3533	0.3169	0.3169	0.3169	0.3313	0.3313	0.3416	0.3317	0.3173	0.3173	0.4849	0.2906	0.4501	0.3169	0.9052	0.2944	0.3486	1.5384	0.548	0.548	0.548	0.5014	0.4809	0.5103	0.0685	0.503	0.503	0.4347	0.5788	0.5685	0.4872	0.535	0.5144	1.2078	1.1949	1.1949	1.1949	0.4119	1.4501	0.5147	0.4119	0.4935	0.4935	0.6625	0.5509	0.5541	0.4409	1.2173
CE1261[c][e]	-0.1492	0.3533	0.3169	0.3169	0.3169	0.3317	0.3317	0.342	0.3317	0.3173	0.3173	0.4849	0.2908	0.4501	0.3169	0.9052	0.2946	0.3489	1.5385	0.548	0.548	0.548	0.5014	0.4809	0.5105	0.0688	0.503	0.503	0.4347	0.5788	0.5685	0.4872	0.535	0.5144	1.208	1.1951	1.1951	1.1951	0.4119	1.4502	0.5147	0.4119	0.4935	0.4935	0.6625	0.5509	0.5541	0.4409	1.2174
CE1273[c][e]	-0.1492	0.3533	0.3169	0.3169	0.3169	0.3313	0.3313	0.3416	0.3317	0.3173	0.3173	0.4849	0.2906	0.4501	0.3169	0.9052	0.2944	0.3486	1.5384	0.548	0.548	0.548	0.5014	0.4809	0.5102	0.0683	0.503	0.503	0.4347	0.5788	0.5685	0.4872	0.535	0.5144	1.2078	1.1949	1.1949	1.1949	0.4119	1.4501	0.5147	0.4119	0.4935	0.4935	0.6625	0.5509	0.5541	0.4409	1.2172
CE1918[c][e]	-0.1492	0.3533	0.3169	0.3169	0.3169	0.3316	0.3313	0.3416	0.3317	0.3173	0.3173	0.4849	0.2906	0.4501	0.3169	0.9052	0.2944	0.3486	1.5384	0.548	0.548	0.548	0.5014	0.4809	0.5105	0.0688	0.503	0.503	0.4347	0.5788	0.5685	0.4872	0.535	0.5144	1.2078	1.1949	1.1949	1.1949	0.4119	1.4501	0.5147	0.4119	0.4935	0.4935	0.6625	0.5509	0.5541	0.4409	1.2174
CE1925[c]	-0.1492	0.3529	0.3169	0.3165	0.3169	0.3313	0.3313	0.3416	0.3313	0.3169	0.3169	0.4846	0.2906	0.4501	0.3169	0.905	0.2944	0.3486	1.5385	0.548	0.548	0.548	0.5014	0.4809	0.5105	0.0683	0.503	0.503	0.4347	0.5788	0.5685	0.4872	0.535	0.5144	1.2078	1.1949	1.1949	1.1949	0.4119	1.4501	0.5147	0.4119	0.4935	0.4935	0.6625	0.5509	0.5541	0.4409	1.2172
CE1926[c]	-0.1492	0.3529	0.3169	0.3165	0.3169	0.3313	0.3313	0.3416	0.3313	0.3169	0.3169	0.4846	0.2906	0.4501	0.3169	0.905	0.2944	0.3486	1.5385	0.548	0.548	0.548	0.5014	0.4809	0.5105	0.0683	0.503	0.503	0.4347	0.5788	0.5685	0.4872	0.535	0.5144	1.2078	1.1949	1.1949	1.1949	0.4119	1.4501	0.5147	0.4119	0.4935	0.4935	0.6625	0.5509	0.5541	0.4409	1.2172
CE2006[c][e]	-0.1492	0.3533	0.3169	0.3169	0.3169	0.3317	0.3313	0.3416	0.3317	0.3173	0.3173	0.4849	0.2906	0.4501	0.3169	0.9052	0.2944	0.3486	1.5384	0.548	0.548	0.548	0.5014	0.4809	0.5105	0.0688	0.503	0.503	0.4347	0.5788	0.5685	0.4872	0.535	0.5144	1.2078	1.1949	1.1949	1.1949	0.4119	1.4501	0.5147	0.4119	0.4935	0.4935	0.6625	0.5509	0.5541	0.4409	1.2174
CE2038[x]	-0.1492	0.3533	0.3169	0.3169	0.3169	0.3313	0.3313	0.3416	0.3317	0.3173	0.3173	0.4849	0.2906	0.4501	0.3169	0.9052	0.2944	0.3486	1.5384	0.548	0.548	0.548	0.5014	0.4809	0.5102	0.0683	0.503	0.503	0.4347	0.5788	0.5685	0.4872	0.535	0.5144	1.2078	1.1949	1.1949	1.1949	0.4119	1.4501	0.5147	0.4119	0.4935	0.4935	0.6625	0.5509	0.5541	0.4409	1.2174
CE2053[c][m][r]	-0.1492	0.3533	0.3169	0.3169	0.3169	0.3313	0.3313	0.3416	0.3317	0.3173	0.3173	0.4849	0.2906	0.4501	0.3169	0.9052	0.2944	0.3486	1.5384	0.548	0.548	0.548	0.5011	0.4809	0.5103	9.6857	0.503	0.503	0.4347	0.5788	0.5685	0.4872	0.535	0.5144	1.2078	1.1949	1.1949	1.1949	0.4119	1.45	0.5146	0.4119	0.4935	0.4935	0.6625	0.5509	0.5541	0.4409	1.2173
CE2084[c][m]	-0.1487	0.3534	0.317	0.317	0.317	0.3315	0.3315	0.3418	0.3318	0.3173	0.3173	0.4852	0.2907	0.4503	0.317	0.9055	0.2945	0.3487	1.5384	0.5471	0.5471	0.5471	0.5005	0.4808	0.5096	0.069	0.5022	0.5022	0.4343	0.5783	0.5679	0.487	0.5341	0.5136	1.2075	1.1945	1.1945	1.1945	0.4115	1.4496	0.5143	0.4115	0.493	0.493	0.662	0.5505	0.5536	0.4404	1.2169
CE2172[c][e]	-0.1492	0.3533	0.3169	0.3169	0.3169	0.3317	0.3313	0.3416	0.3317	0.3173	0.3173	0.4849	0.2906	0.4501	0.3169	0.9052	0.2944	0.3486	1.5384	0.548	0.548	0.548	0.5014	0.4809	0.5105	0.0688	0.503	0.503	0.4347	0.5788	0.5685	0.4872	0.535	0.5144	1.2078	1.1949	1.1949	1.1949	0.4119	1.4501	0.5147	0.4119	0.4935	0.4935	0.6625	0.5509	0.5541	0.4409	1.2174
CE2176[c][e]	-0.1492	0.3533	0.3169	0.3169	0.3169	0.3313	0.3313	0.3416	0.3317	0.3173	0.3173	0.4849	0.2906	0.4501	0.3169	0.9052	0.2944	0.3486	1.5384	0.548	0.548	0.548	0.5014	0.4809	0.5105	0.0688	0.503	0.503	0.4347	0.5788	0.5685	0.4872	0.535	0.5144	1.2078	1.1949	1.1949	1.1949	0.4119	1.4501	0.5147	0.4119	0.4935	0.4935	0.6625	0.5509	0.5541	0.4409	1.2174
CE2242[c][m][x]	-0.1492	0.3533	0.3169	0.3169	0.3169	0.3317	0.3313	0.3416	0.3317	0.3173	0.3173	0.4849	0.2906	0.4501	0.3169	0.9052	0.2944	0.3486	1.5385	0.548	0.548	0.548	0.5014	0.4809	0.5105	0.0683	0.503	0.503	0.4347	0.5788	0.5685	0.4872	0.535	0.5144	1.2078	1.1949	1.1949	1.1949	0.4119	1.4501	0.5147	0.4119	0.4935	0.4935	0.6625	0.5509	0.5541	0.4409	1.2174
CE2243[c][m][x]	-0.1492	0.3533	0.3169	0.3169	0.3169	0.3317	0.3313	0.3416	0.3317	0.3173	0.3173	0.4849	0.2906	0.4501	0.3169	0.9052	0.2944	0.3486	1.5384	0.548	0.548	0.548	0.5014	0.4809	0.5105	0.0683	0.503	0.503	0.4347	0.5788	0.5685	0.4872	0.535	0.5144	1.2078	1.1949	1.1949	1.1949	0.4119	1.4501	0.5147	0.4119	0.4935	0.4935	0.6625	0.5509	0.5541	0.4409	1.2174
CE2245[c][x]	-0.1492	0.3533	0.3169	0.3169	0.3169	0.3313	0.3313	0.3416	0.3317	0.3173	0.3173	0.4849	0.2906	0.4501	0.3169	0.9052	0.2944	0.3486	1.5384	0.548	0.548	0.548	0.501	0.4809	0.5102	0.0683	0.503	0.503	0.4347	0.5788	0.5685	0.4872	0.535	0.5144	1.2078	1.1949	1.1949	1.1949	0.4119	1.4501	0.5147	0.4119	0.4935	0.4935	0.6625	0.5509	0.5537	0.4409	1.2172
CE2246[c][m][x]	-0.1492	0.3533	0.3169	0.3169	0.3169	0.3317	0.3313	0.3416	0.3317	0.3173	0.3173	0.4849	0.2906	0.4501	0.3169	0.9052	0.2944	0.3486	1.5385	0.548	0.548	0.548	0.5014	0.4809	0.5105	0.0683	0.503	0.503	0.4347	0.5788	0.5685	0.4872	0.535	0.5144	1.2078	1.1949	1.1949	1.1949	0.4119	1.4501	0.5147	0.4119	0.4935	0.4935	0.6625	0.5509	0.5541	0.4409	1.2174
CE2247[c][m][x]	-0.1492	0.3533	0.3169	0.3169	0.3169	0.3317	0.3313	0.3416	0.3317	0.3173	0.3173	0.4849	0.2906	0.4501	0.3169	0.9052	0.2944	0.3486	1.5384	0.548	0.548	0.548	0.5014	0.4809	0.5105	0.0683	0.503	0.503	0.4347	0.5788	0.5685	0.4872	0.535	0.5144	1.2078	1.1949	1.1949	1.1949	0.4119	1.4501	0.5147	0.4119	0.4935	0.4935	0.6625	0.5509	0.5541	0.4409	1.2174
CE2248[c][m][x]	-0.1492	0.3533	0.3169	0.3169	0.3169	0.3313	0.3313	0.3416	0.3317	0.3173	0.3173	0.4849	0.2906	0.4501	0.3169	0.9052	0.2944	0.3486	1.5384	0.548	0.548	0.548	0.501	0.4809	0.5102	0.0683	0.503	0.503	0.4347	0.5788	0.5685	0.4872	0.535	0.5144	1.2078	1.1949	1.1949	1.1949	0.4119	1.4501	0.5147	0.4119	0.4935	0.4935	0.6625	0.5509	0.5541	0.4409	1.2172
CE2249[c][x]	-0.1492	0.3533	0.3169	0.3169	0.3169	0.3313	0.3313	0.3416	0.3317	0.3173	0.3173	0.4849	0.2906	0.4501	0.3169	0.9052	0.2944	0.3486	1.5384	0.548	0.548	0.548	0.501	0.4809	0.5102	0.0683	0.503	0.503	0.4347	0.5788	0.5685	0.4872	0.535	0.5144	1.2078	1.1949	1.1949	1.1949	0.4119	1.4501	0.5147	0.4119	0.4935	0.4935	0.6625	0.5509	0.5537	0.4409	1.2172
CE2250[c][m][x]	-0.1492	0.3533	0.3169	0.3169	0.3169	0.3317	0.3313	0.3416	0.3317	0.3173	0.3173	0.4849	0.2906	0.4501	0.3169	0.9052	0.2944	0.3486	1.5385	0.548	0.548	0.548	0.5014	0.4809	0.5105	0.0683	0.503	0.503	0.4347	0.5788	0.5685	0.4872	0.535	0.5144	1.2078	1.1949	1.1949	1.1949	0.4119	1.4501	0.5147	0.4119	0.4935	0.4935	0.6625	0.5509	0.5541	0.4409	1.2174
CE2251[c][m][x]	-0.1492	0.3533	0.3169	0.3169	0.3169	0.3317	0.3313	0.3416	0.3317	0.3173	0.3173	0.4849	0.2906	0.4501	0.3169	0.9052	0.2944	0.3486	1.5384	0.548	0.548	0.548	0.5014	0.4809	0.5105	0.0683	0.503	0.503	0.4347	0.5788	0.5685	0.4872	0.535	0.5144	1.2078	1.1949	1.1949	1.1949	0.4119	1.4501	0.5147	0.4119	0.4935	0.4935	0.6625	0.5509	0.5541	0.4409	1.2174
CE2253[c][x]	-0.1492	0.3533	0.3169	0.3169	0.3169	0.3313	0.3313	0.3416	0.3317	0.3173	0.3173	0.4849	0.2906	0.4501	0.3169	0.9052	0.2944	0.3486	1.5384	0.548	0.548	0.548	0.501	0.4809	0.5102	0.0683	0.503	0.503	0.4347	0.5788	0.5685	0.4872	0.535	0.5144	1.2078	1.1949	1.1949	1.1949	0.4119	1.4501	0.5147	0.4119	0.4935	0.4935	0.6625	0.5509	0.5537	0.4409	1.2172
CE2314[c]	-24.8923	0.3529	0.3169	0.3169	0.3169	0.3313	0.3313	0.3416	0.3317	0.3173	0.3173	0.4849	0.2906	0.4501	0.3169	0.9052	0.2944	0.3486	1.5384	0.548	0.548	0.548	0.501	0.4809	0.5102	0.0683	0.503	0.503	0.4347	0.5788	0.5685	0.4872	0.535	0.5144	1.2078	1.1949	1.1949	1.1949	0.4119	1.4501	0.5147	0.4119	0.4935	0.4935	0.6625	0.5509	0.5537	0.4409	1.2172
CE2417[m][x]	1.8811	0.3533	0.3169	0.3169	0.3169	0.3317	0.3313	0.3416	0.3317	0.3173	0.3173	0.4849	0.2906	0.4501	0.3169	0.9052	0.2944	0.3486	1.5384	0.548	0.548	0.548	0.5014	0.4809	0.5105	0.0688	0.503	0.503	0.4347	0.5788	0.5685	0.4872	0.535	0.5144	1.2078	1.1949	1.1949	1.1949	0.4119	1.4501	0.5147	0.4119	0.4935	0.4935	0.6625	0.5509	0.5541	0.4409	1.2174
CE2418[m][x]	1.8811	0.3533	0.3169	0.3169	0.3169	0.3315	0.3313	0.3416	0.3317	0.3173	0.3173	0.4849	0.2906	0.4501	0.3169	0.9052	0.2944	0.3486	1.5384	0.548	0.548	0.548	0.5014	0.4809	0.5105	0.0685	0.503	0.503	0.4347	0.5788	0.5685	0.4872	0.535	0.5144	1.2078	1.1949	1.1949	1.1949	0.4119	1.4501	0.5147	0.4119	0.4935	0.4935	0.6625	0.5509	0.5541	0.4409	1.2174
CE2420[m][x]	1.8811	0.3533	0.3169	0.3169	0.3169	0.3315	0.3313	0.3416	0.3317	0.3173	0.3173	0.4849	0.2906	0.4501	0.3169	0.9052	0.2944	0.3486	1.5384	0.548	0.548	0.548	0.5014	0.4809	0.5105	0.0685	0.503	0.503	0.4347	0.5788	0.5685	0.4872	0.535	0.5144	1.2078	1.1949	1.1949	1.1949	0.4119	1.4501	0.5147	0.4119	0.4935	0.4935	0.6625	0.5509	0.5541	0.4409	1.2174
CE2421[m][x]	2.2952	0.3533	0.3169	0.3169	0.3169	0.3313	0.3313	0.3416	0.3317	0.3173	0.3173	0.4849	0.2906	0.4501	0.3169	0.9052	0.2944	0.3486	1.5384	0.548	0.548	0.548	0.5014	0.4809	0.5104	0.0686	0.503	0.503	0.4347	0.5788	0.5685	0.4872	0.535	0.5144	1.2078	1.1949	1.1949	1.1949	0.4119	1.4501	0.5147	0.4119	0.4935	0.4935	0.6625	0.5509	0.5541	0.4409	1.2174
CE2422[m][x]	1.8811	0.3533	0.3169	0.3169	0.3169	0.3315	0.3313	0.3416	0.3317	0.3173	0.3173	0.4849	0.2906	0.4501	0.3169	0.9052	0.2944	0.3486	1.5384	0.548	0.548	0.548	0.5014	0.4809	0.5105	0.0685	0.503	0.503	0.4347	0.5788	0.5685	0.4872	0.535	0.5144	1.2078	1.1949	1.1949	1.1949	0.4119	1.4501	0.5147	0.4119	0.4935	0.4935	0.6625	0.5509	0.5541	0.4409	1.2174
CE2424[m][x]	1.8811	0.3533	0.3169	0.3169	0.3169	0.3317	0.3313	0.3416	0.3317	0.3173	0.3173	0.4849	0.2906	0.4501	0.3169	0.9052	0.2944	0.3486	1.5384	0.548	0.548	0.548	0.5014	0.4809	0.5105	0.0688	0.503	0.503	0.4347	0.5788	0.5685	0.4872	0.535	0.5144	1.2078	1.1949	1.1949	1.1949	0.4119	1.4501	0.5147	0.4119	0.4935	0.4935	0.6625	0.5509	0.5541	0.4409	1.2174
CE2432[m][x]	1.9663	0.3532	0.3168	0.3168	0.3168	0.3315	0.3313	0.3415	0.3316	0.3172	0.3172	0.4848	0.2905	0.45	0.3168	0.9052	0.2943	0.3485	1.5383	0.5479	0.5479	0.5479	0.5012	0.4808	0.5103	0.0686	0.5028	0.5028	0.4346	0.5787	0.5684	0.4871	0.5348	0.5142	1.2077	1.1948	1.1948	1.1948	0.4118	1.4499	0.5146	0.4118	0.4933	0.4933	0.6624	0.5507	0.5539	0.4408	1.2173
CE2433[m][x]	1.4627	0.3533	0.3169	0.3169	0.3169	0.3314	0.3313	0.3416	0.3317	0.3173	0.3173	0.4849	0.2906	0.4501	0.3169	0.9052	0.2944	0.3486	1.5384	0.548	0.548	0.548	0.5014	0.4809	0.5104	0.0685	0.503	0.503	0.4347	0.5788	0.5685	0.4872	0.535	0.5144	1.2078	1.1949	1.1949	1.1949	0.4119	1.4501	0.5147	0.4119	0.4935	0.4935	0.6625	0.5509	0.5541	0.4409	1.2174
CE2434[m][x]	1.8811	0.3533	0.3169	0.3169	0.3169	0.3313	0.3313	0.3416	0.3317	0.3173	0.3173	0.4849	0.2906	0.4501	0.3169	0.9052	0.2944	0.3486	1.5384	0.548	0.548	0.548	0.5014	0.4809	0.5103	0.0685	0.503	0.503	0.4347	0.5788	0.5685	0.4872	0.535	0.5144	1.2078	1.1949	1.1949	1.1949	0.4119	1.4501	0.5147	0.4119	0.4935	0.4935	0.6625	0.5509	0.5541	0.4409	1.2173
CE2437[m][x]	-0.1492	0.3533	0.3169	0.3169	0.3169	0.3313	0.3313	0.3416	0.3317	0.3173	0.3173	0.4849	0.2906	0.4501	0.3169	0.9052	0.2944	0.3486	1.5384	0.548	0.548	0.548	0.5014	0.4809	0.5105	0.0683	0.503	0.503	0.4347	0.5788	0.5685	0.4872	0.535	0.5144	1.2078	1.1949	1.1949	1.1949	0.4119	1.4501	0.5147	0.4119	0.4935	0.4935	0.6625	0.5509	0.5541	0.4409	1.2172
CE2438[m][x]	-0.1492	0.3533	0.3169	0.3169	0.3169	0.3313	0.3313	0.3416	0.3317	0.3173	0.3173	0.4849	0.2906	0.4501	0.3169	0.9052	0.2944	0.3486	1.5384	0.548	0.548	0.548	0.5014	0.4809	0.5105	0.0683	0.503	0.503	0.4347	0.5788	0.5685	0.4872	0.535	0.5144	1.2078	1.1949	1.1949	1.1949	0.4119	1.4501	0.5147	0.4119	0.4935	0.4935	0.6625	0.5509	0.5541	0.4409	1.2173
CE2439[m][x]	-0.1492	0.3533	0.3169	0.3169	0.3169	0.3313	0.3313	0.3416	0.3317	0.3173	0.3173	0.4849	0.2906	0.4501	0.3169	0.9052	0.2944	0.3486	1.5384	0.548	0.548	0.548	0.5014	0.4809	0.5105	0.0683	0.503	0.503	0.4347	0.5788	0.5685	0.4872	0.535	0.5144	1.2078	1.1949	1.1949	1.1949	0.4119	1.4501	0.5147	0.4119	0.4935	0.4935	0.6625	0.5509	0.5541	0.4409	1.2173
CE2440[m][x]	-0.1492	0.3533	0.3169	0.3169	0.3169	0.3313	0.3313	0.3416	0.3317	0.3173	0.3173	0.4849	0.2906	0.4501	0.3169	0.9052	0.2944	0.3486	1.5384	0.548	0.548	0.548	0.5014	0.4809	0.5105	0.0683	0.503	0.503	0.4347	0.5788	0.5685	0.4872	0.535	0.5144	1.2078	1.1949	1.1949	1.1949	0.4119	1.4501	0.5147	0.4119	0.4935	0.4935	0.6625	0.5509	0.5541	0.4409	1.2173
CE2441[m][x]	-0.1492	0.3533	0.3169	0.3169	0.3169	0.3313	0.3313	0.3416	0.3317	0.3173	0.3173	0.4849	0.2906	0.4501	0.3169	0.9052	0.2944	0.3486	1.5384	0.548	0.548	0.548	0.5014	0.4809	0.5105	0.0683	0.503	0.503	0.4347	0.5788	0.5685	0.4872	0.535	0.5144	1.2078	1.1949	1.1949	1.1949	0.4119	1.4501	0.5147	0.4119	0.4935	0.4935	0.6625	0.5509	0.5541	0.4409	1.2173
CE2442[m][x]	-0.1492	0.3533	0.3169	0.3169	0.3169	0.3313	0.3313	0.3416	0.3317	0.3173	0.3173	0.4849	0.2906	0.4501	0.3169	0.9052	0.2944	0.3486	1.5384	0.548	0.548	0.548	0.5014	0.4809	0.5105	0.0683	0.503	0.503	0.4347	0.5788	0.5685	0.4872	0.535	0.5144	1.2078	1.1949	1.1949	1.1949	0.4119	1.4501	0.5147	0.4119	0.4935	0.4935	0.6625	0.5509	0.5541	0.4409	1.2173
CE2445[c][e]	-0.1492	0.3533	0.3169	0.3169	0.3169	0.3313	0.3313	0.3416	0.3317	0.3173	0.3173	0.4849	0.2906	0.4501	0.3169	0.9052	0.2944	0.3486	1.5384	0.548	0.548	0.548	0.501	0.4809	0.5102	0.0683	0.503	0.503	0.4347	0.5788	0.5685	0.4872	0.535	0.5144	1.2078	1.1949	1.1949	1.1949	0.4119	1.4501	0.5147	0.4119	0.4935	0.4935	0.6625	0.5509	0.5541	0.4409	1.2172
CE2510[c][e][r]	-0.1492	0.3529	0.3165	0.3165	0.3165	0.3313	0.3313	0.3416	0.3313	0.3169	0.3169	0.4846	0.2906	0.4501	0.3169	0.905	0.2944	0.3486	1.5382	0.5477	0.5477	0.5477	0.501	0.4806	0.5102	0.0683	0.5027	0.5027	0.4347	0.5785	0.5682	0.4869	0.5347	0.5141	1.2076	1.1947	1.1947	1.1947	0.4116	1.4499	0.5144	0.4116	0.4931	0.4931	0.6622	0.5506	0.5537	0.4405	1.2172
CE2576[c]	-0.1492	0.3533	0.3169	0.3169	0.3169	0.3317	0.3313	0.3416	0.3317	0.3173	0.3173	0.4849	0.2906	0.4501	0.3169	0.9052	0.2944	0.3486	1.5384	0.548	0.548	0.548	0.5014	0.4809	0.5105	0.0688	0.503	0.503	0.4347	0.5788	0.5685	0.4872	0.535	0.5144	1.2078	1.1949	1.1949	1.1949	0.4119	1.4501	0.5147	0.4119	0.4935	0.4935	0.6625	0.5509	0.5541	0.4409	1.2174
CE2577[c]	-0.1492	0.3533	0.3169	0.3169	0.3169	0.3317	0.3313	0.3416	0.3317	0.3173	0.3173	0.4849	0.2906	0.4501	0.3169	0.9052	0.2944	0.3486	1.5384	0.548	0.548	0.548	0.5014	0.4809	0.5105	0.0688	0.503	0.503	0.4347	0.5788	0.5685	0.4872	0.535	0.5144	1.2078	1.1949	1.1949	1.1949	0.4119	1.4501	0.5147	0.4119	0.4935	0.4935	0.6625	0.5509	0.5541	0.4409	1.2174
CE2705[c][e][n]	-0.1492	0.3533	0.3169	0.3169	0.3169	0.3315	0.3313	0.3416	0.3317	0.3173	0.3173	0.4849	0.2906	0.4501	0.3169	0.9052	0.2944	0.3486	1.5384	0.548	0.548	0.548	0.5014	0.4809	0.5103	0.0685	0.503	0.503	0.4347	0.5788	0.5685	0.4872	0.535	0.5144	1.2078	1.1949	1.1949	1.1949	0.4119	1.4501	0.5147	0.4119	0.4935	0.4935	0.6625	0.5509	0.5541	0.4409	1.2174
CE4790[m]	-0.1492	0.3533	0.3169	0.3169	0.3169	0.3313	0.3313	0.3416	0.3317	0.3173	0.3173	0.4849	0.2906	0.4501	0.3169	0.9052	0.2944	0.3486	1.5384	0.548	0.548	0.548	0.5014	0.4809	0.5105	0.0688	0.503	0.503	0.4347	0.5788	0.5685	0.4872	0.535	0.5144	1.2078	1.1949	1.1949	1.1949	0.4119	1.4501	0.5147	0.4119	0.4935	0.4935	0.6625	0.5509	0.5541	0.4409	1.2174
CE4791[c][m][x]	-0.1492	0.3529	0.3169	0.3169	0.3169	0.3313	0.3313	0.3416	0.3317	0.3173	0.3173	0.4849	0.2906	0.4501	0.3169	0.9052	0.2944	0.3486	1.5384	0.548	0.548	0.548	0.501	0.4809	0.5102	0.0683	0.503	0.503	0.4347	0.5788	0.5685	0.4872	0.535	0.5144	1.2078	1.1949	1.1949	1.1949	0.4119	1.4501	0.5147	0.4119	0.4935	0.4935	0.6622	0.5509	0.5537	0.4409	1.2172
CE4792[m]	-0.1492	0.3533	0.3169	0.3169	0.3169	0.3313	0.3313	0.3416	0.3317	0.3173	0.3173	0.4849	0.2906	0.4501	0.3169	0.9052	0.2944	0.3486	1.5384	0.548	0.548	0.548	0.5014	0.4809	0.5105	0.0688	0.503	0.503	0.4347	0.5788	0.5685	0.4872	0.535	0.5144	1.2078	1.1949	1.1949	1.1949	0.4119	1.4501	0.5147	0.4119	0.4935	0.4935	0.6625	0.5509	0.5541	0.4409	1.2174
CE4793[c][m][x]	-0.1492	0.3529	0.3169	0.3169	0.3169	0.3313	0.3313	0.3416	0.3317	0.3173	0.3173	0.4849	0.2906	0.4501	0.3169	0.9052	0.2944	0.3486	1.5384	0.548	0.548	0.548	0.501	0.4809	0.5102	0.0683	0.503	0.503	0.4347	0.5788	0.5685	0.4872	0.535	0.5144	1.2078	1.1949	1.1949	1.1949	0.4119	1.4501	0.5147	0.4119	0.4935	0.4935	0.6622	0.5509	0.5537	0.4409	1.2172
CE4794[m]	-0.1492	0.3533	0.3169	0.3169	0.3169	0.3313	0.3313	0.3416	0.3317	0.3173	0.3173	0.4849	0.2906	0.4501	0.3169	0.9052	0.2944	0.3486	1.5384	0.548	0.548	0.548	0.5014	0.4809	0.5105	0.0688	0.503	0.503	0.4347	0.5788	0.5685	0.4872	0.535	0.5144	1.2078	1.1949	1.1949	1.1949	0.4119	1.4501	0.5147	0.4119	0.4935	0.4935	0.6625	0.5509	0.5541	0.4409	1.2174
CE4795[m][x]	-0.1492	0.3529	0.3169	0.3169	0.3169	0.3313	0.3313	0.3416	0.3317	0.3173	0.3173	0.4849	0.2906	0.4501	0.3169	0.9052	0.2944	0.3486	1.5384	0.548	0.548	0.548	0.501	0.4809	0.5102	0.0683	0.503	0.503	0.4347	0.5788	0.5685	0.4872	0.535	0.5144	1.2078	1.1949	1.1949	1.1949	0.4119	1.4501	0.5147	0.4119	0.4935	0.4935	0.6622	0.5509	0.5537	0.4409	1.2172
CE4796[m]	-0.1492	0.3533	0.3169	0.3169	0.3169	0.3313	0.3313	0.3416	0.3317	0.3173	0.3173	0.4849	0.2906	0.4501	0.3169	0.9052	0.2944	0.3486	1.5384	0.548	0.548	0.548	0.501	0.4809	0.5102	0.0683	0.503	0.503	0.4347	0.5788	0.5685	0.4872	0.535	0.5144	1.2078	1.1949	1.1949	1.1949	0.4119	1.4501	0.5147	0.4119	0.4935	0.4935	0.6625	0.5509	0.5541	0.4409	1.2174
CE4797[m]	-0.1492	0.3533	0.3169	0.3169	0.3169	0.3313	0.3313	0.3416	0.3317	0.3173	0.3173	0.4849	0.2906	0.4501	0.3169	0.9052	0.2944	0.3486	1.5384	0.548	0.548	0.548	0.501	0.4809	0.5102	0.0683	0.503	0.503	0.4347	0.5788	0.5685	0.4872	0.535	0.5144	1.2078	1.1949	1.1949	1.1949	0.4119	1.4501	0.5147	0.4119	0.4935	0.4935	0.6625	0.5509	0.5541	0.4409	1.2174
CE4798[m]	-0.1492	0.3533	0.3169	0.3169	0.3169	0.3313	0.3313	0.3416	0.3317	0.3173	0.3173	0.4849	0.2906	0.4501	0.3169	0.9052	0.2944	0.3486	1.5384	0.548	0.548	0.548	0.501	0.4809	0.5102	0.0683	0.503	0.503	0.4347	0.5788	0.5685	0.4872	0.535	0.5144	1.2078	1.1949	1.1949	1.1949	0.4119	1.4501	0.5147	0.4119	0.4935	0.4935	0.6625	0.5509	0.5541	0.4409	1.2174
CE4799[m]	-0.1492	0.3533	0.3169	0.3169	0.3169	0.3313	0.3313	0.3416	0.3317	0.3173	0.3173	0.4849	0.2906	0.4501	0.3169	0.9052	0.2944	0.3486	1.5384	0.548	0.548	0.548	0.501	0.4809	0.5102	0.0683	0.503	0.503	0.4347	0.5788	0.5685	0.4872	0.535	0.5144	1.2078	1.1949	1.1949	1.1949	0.4119	1.4501	0.5147	0.4119	0.4935	0.4935	0.6625	0.5509	0.5541	0.4409	1.2174
CE4800[m]	-0.1492	0.3533	0.3169	0.3169	0.3169	0.3313	0.3313	0.3416	0.3317	0.3173	0.3173	0.4849	0.2906	0.4501	0.3169	0.9052	0.2944	0.3486	1.5384	0.548	0.548	0.548	0.501	0.4809	0.5102	0.0683	0.503	0.503	0.4347	0.5788	0.5685	0.4872	0.535	0.5144	1.2078	1.1949	1.1949	1.1949	0.4119	1.4501	0.5147	0.4119	0.4935	0.4935	0.6625	0.5509	0.5541	0.4409	1.2174
CE4801[m]	-0.1492	0.3533	0.3169	0.3169	0.3169	0.3313	0.3313	0.3416	0.3317	0.3173	0.3173	0.4849	0.2906	0.4501	0.3169	0.9052	0.2944	0.3486	1.5384	0.548	0.548	0.548	0.501	0.4809	0.5102	0.0683	0.503	0.503	0.4347	0.5788	0.5685	0.4872	0.535	0.5144	1.2078	1.1949	1.1949	1.1949	0.4119	1.4501	0.5147	0.4119	0.4935	0.4935	0.6625	0.5509	0.5541	0.4409	1.2174
CE4802[m]	-0.1492	0.3533	0.3169	0.3169	0.3169	0.3313	0.3313	0.3416	0.3317	0.3173	0.3173	0.4849	0.2906	0.4501	0.3169	0.9052	0.2944	0.3486	1.5384	0.548	0.548	0.548	0.501	0.4809	0.5102	0.0683	0.503	0.503	0.4347	0.5788	0.5685	0.4872	0.535	0.5144	1.2078	1.1949	1.1949	1.1949	0.4119	1.4501	0.5147	0.4119	0.4935	0.4935	0.6625	0.5509	0.5541	0.4409	1.2174
CE4803[m]	-0.1492	0.3533	0.3169	0.3169	0.3169	0.3313	0.3313	0.3416	0.3317	0.3173	0.3173	0.4849	0.2906	0.4501	0.3169	0.9052	0.2944	0.3486	1.5384	0.548	0.548	0.548	0.501	0.4809	0.5102	0.0683	0.503	0.503	0.4347	0.5788	0.5685	0.4872	0.535	0.5144	1.2078	1.1949	1.1949	1.1949	0.4119	1.4501	0.5147	0.4119	0.4935	0.4935	0.6625	0.5509	0.5541	0.4409	1.2174
CE4804[m]	-0.1492	0.3533	0.3169	0.3169	0.3169	0.3313	0.3313	0.3416	0.3317	0.3173	0.3173	0.4849	0.2906	0.4501	0.3169	0.9052	0.2944	0.3486	1.5384	0.548	0.548	0.548	0.501	0.4809	0.5102	0.0683	0.503	0.503	0.4347	0.5788	0.5685	0.4872	0.535	0.5144	1.2078	1.1949	1.1949	1.1949	0.4119	1.4501	0.5147	0.4119	0.4935	0.4935	0.6625	0.5509	0.5541	0.4409	1.2174
CE4806[m]	-0.1492	0.3533	0.3169	0.3169	0.3169	0.3313	0.3313	0.3416	0.3317	0.3173	0.3173	0.4849	0.2906	0.4501	0.3169	0.9052	0.2944	0.3486	1.5384	0.548	0.548	0.548	0.501	0.4809	0.5102	0.0683	0.503	0.503	0.4347	0.5788	0.5685	0.4872	0.535	0.5144	1.2078	1.1949	1.1949	1.1949	0.4119	1.4501	0.5147	0.4119	0.4935	0.4935	0.6625	0.5509	0.5541	0.4409	1.2174
CE4807[m]	-0.1492	0.3533	0.3169	0.3169	0.3169	0.3313	0.3313	0.3416	0.3317	0.3173	0.3173	0.4849	0.2906	0.4501	0.3169	0.9052	0.2944	0.3486	1.5384	0.548	0.548	0.548	0.501	0.4809	0.5102	0.0683	0.503	0.503	0.4347	0.5788	0.5685	0.4872	0.535	0.5144	1.2078	1.1949	1.1949	1.1949	0.4119	1.4501	0.5147	0.4119	0.4935	0.4935	0.6625	0.5509	0.5541	0.4409	1.2174
CE4808[m]	-0.1492	0.3533	0.3169	0.3169	0.3169	0.3313	0.3313	0.3416	0.3317	0.3173	0.3173	0.4849	0.2906	0.4501	0.3169	0.9052	0.2944	0.3486	1.5384	0.548	0.548	0.548	0.501	0.4809	0.5102	0.0683	0.503	0.503	0.4347	0.5788	0.5685	0.4872	0.535	0.5144	1.2078	1.1949	1.1949	1.1949	0.4119	1.4501	0.5147	0.4119	0.4935	0.4935	0.6625	0.5509	0.5541	0.4409	1.2174
CE4810[c]	-0.1492	0.3533	0.3169	0.3169	0.3169	0.3313	0.3313	0.3416	0.3317	0.3173	0.3173	0.4849	0.2906	0.4501	0.3169	0.9052	0.2944	0.3486	1.5384	0.548	0.548	0.548	0.501	0.4809	0.5102	0.0683	0.503	0.503	0.4347	0.5788	0.5685	0.4872	0.535	0.5144	1.2078	1.1949	1.1949	1.1949	0.4119	1.4501	0.5147	0.4119	0.4935	0.4935	0.6625	0.5509	0.5541	0.4409	1.2172
CE4811[c]	-0.1492	0.3533	0.3169	0.3169	0.3169	0.3313	0.3313	0.3416	0.3317	0.3173	0.3173	0.4849	0.2906	0.4501	0.3169	0.9052	0.2944	0.3486	1.5384	0.548	0.548	0.548	0.501	0.4809	0.5102	0.0683	0.503	0.503	0.4347	0.5788	0.5685	0.4872	0.535	0.5144	1.2078	1.1949	1.1949	1.1949	0.4119	1.4501	0.5147	0.4119	0.4935	0.4935	0.6625	0.5509	0.5541	0.4409	1.2172
CE4812[c]	-0.1492	0.3533	0.3169	0.3169	0.3169	0.3313	0.3313	0.3416	0.3317	0.3173	0.3173	0.4849	0.2906	0.4501	0.3169	0.9052	0.2944	0.3486	1.5384	0.548	0.548	0.548	0.501	0.4809	0.5102	0.0683	0.503	0.503	0.4347	0.5788	0.5685	0.4872	0.535	0.5144	1.2078	1.1949	1.1949	1.1949	0.4119	1.4501	0.5147	0.4119	0.4935	0.4935	0.6625	0.5509	0.5541	0.4409	1.2172
CE4817[c]	-0.1492	0.3529	0.3169	0.3169	0.3169	0.3313	0.3313	0.3416	0.3317	0.3173	0.3173	0.4849	0.2906	0.4501	0.3169	0.9052	0.2944	0.3486	1.5384	0.548	0.548	0.548	0.501	0.4809	0.5102	0.0683	0.503	0.503	0.4347	0.5788	0.5685	0.4872	0.535	0.5144	1.2078	1.1949	1.1949	1.1949	0.4119	1.4499	0.5147	0.4119	0.4935	0.4935	0.6625	0.5509	0.5537	0.4409	1.2172
CE4819[c]	-0.1492	0.3529	0.3169	0.3169	0.3169	0.3313	0.3313	0.3416	0.3317	0.3173	0.3173	0.4849	0.2906	0.4501	0.3169	0.9052	0.2944	0.3486	1.5384	0.548	0.548	0.548	0.501	0.4809	0.5102	0.0683	0.503	0.503	0.4347	0.5788	0.5685	0.4872	0.535	0.5144	1.2078	1.1949	1.1949	1.1949	0.4119	1.4499	0.5147	0.4119	0.4935	0.4935	0.6625	0.5509	0.5537	0.4409	1.2172
CE4820[x]	-0.1492	0.3533	0.3169	0.3169	0.3169	0.3313	0.3313	0.3416	0.3317	0.3173	0.3173	0.4849	0.2906	0.4501	0.3169	0.9052	0.2944	0.3486	1.5384	0.548	0.548	0.548	0.5014	0.4809	0.5102	0.0688	0.503	0.503	0.4347	0.5788	0.5685	0.4872	0.535	0.5144	1.2078	1.1949	1.1949	1.1949	0.4119	1.4501	0.5147	0.4119	0.4935	0.4935	0.6625	0.5509	0.5541	0.4409	1.2172
CE4821[c]	-0.1492	0.3529	0.3169	0.3169	0.3169	0.3313	0.3313	0.3416	0.3317	0.3173	0.3173	0.4849	0.2906	0.4501	0.3169	0.9052	0.2944	0.3486	1.5384	0.548	0.548	0.548	0.501	0.4809	0.5102	0.0683	0.503	0.503	0.4347	0.5788	0.5685	0.4872	0.535	0.5144	1.2078	1.1949	1.1949	1.1949	0.4119	1.4499	0.5147	0.4119	0.4935	0.4935	0.6625	0.5509	0.5537	0.4409	1.2172
CE4831[c]	-0.1492	0.3533	0.3169	0.3169	0.3169	0.3313	0.3313	0.3416	0.3317	0.3173	0.3173	0.4849	0.2906	0.4501	0.3169	0.9052	0.2944	0.3486	1.5384	0.548	0.548	0.548	0.501	0.4809	0.5102	0.0683	0.503	0.503	0.4347	0.5788	0.5685	0.4872	0.535	0.5144	1.2078	1.1949	1.1949	1.1949	0.4119	1.4501	0.5147	0.4119	0.4935	0.4935	0.6625	0.5509	0.5541	0.4409	1.2174
CE4832[x]	-0.1492	0.3533	0.3169	0.3169	0.3169	0.3313	0.3313	0.3416	0.3317	0.3173	0.3173	0.4849	0.2906	0.4501	0.3169	0.9052	0.2944	0.3486	1.5384	0.548	0.548	0.548	0.5014	0.4809	0.5102	0.0688	0.503	0.503	0.4347	0.5788	0.5685	0.4872	0.535	0.5144	1.2078	1.1949	1.1949	1.1949	0.4119	1.4501	0.5147	0.4119	0.4935	0.4935	0.6625	0.5509	0.5541	0.4409	1.2172
CE4833[c]	-0.1492	0.3533	0.3169	0.3169	0.3169	0.3313	0.3313	0.3416	0.3317	0.3173	0.3173	0.4849	0.2906	0.4501	0.3169	0.9052	0.2944	0.3486	1.5384	0.548	0.548	0.548	0.501	0.4809	0.5102	0.0683	0.503	0.503	0.4347	0.5788	0.5685	0.4872	0.535	0.5144	1.2078	1.1949	1.1949	1.1949	0.4119	1.4501	0.5147	0.4119	0.4935	0.4935	0.6625	0.5509	0.5541	0.4409	1.2174
CE4834[c]	-0.1492	0.3529	0.3169	0.3169	0.3169	0.3313	0.3313	0.3416	0.3317	0.3173	0.3173	0.4849	0.2906	0.4501	0.3169	0.9052	0.2944	0.3486	1.5384	0.5477	0.5477	0.5477	0.501	0.4809	0.5102	0.0683	0.503	0.503	0.4347	0.5788	0.5685	0.4872	0.5347	0.5144	1.2078	1.1949	1.1949	1.1949	0.4119	1.4501	0.5147	0.4119	0.4935	0.4935	0.6625	0.5509	0.5537	0.4409	1.2172
CE4835[c]	-0.1492	0.3533	0.3169	0.3169	0.3169	0.3313	0.3313	0.3416	0.3317	0.3173	0.3173	0.4849	0.2906	0.4501	0.3169	0.9052	0.2944	0.3486	1.5384	0.548	0.548	0.548	0.501	0.4809	0.5102	0.0683	0.503	0.503	0.4347	0.5788	0.5685	0.4872	0.535	0.5144	1.2078	1.1949	1.1949	1.1949	0.4119	1.4501	0.5147	0.4119	0.4935	0.4935	0.6625	0.5509	0.5541	0.4409	1.2174
CE4838[x]	-0.1492	0.3533	0.3169	0.3169	0.3169	0.3313	0.3313	0.3416	0.3317	0.3173	0.3173	0.4849	0.2906	0.4501	0.3169	0.9052	0.2944	0.3486	1.5384	0.548	0.548	0.548	0.5014	0.4809	0.5102	0.0688	0.503	0.503	0.4347	0.5788	0.5685	0.4872	0.535	0.5144	1.2078	1.1949	1.1949	1.1949	0.4119	1.4501	0.5147	0.4119	0.4935	0.4935	0.6625	0.5509	0.5541	0.4409	1.2172
CE4840[c]	-0.1492	0.3533	0.3169	0.3169	0.3169	0.3313	0.3313	0.3416	0.3317	0.3173	0.3173	0.4849	0.2906	0.4501	0.3169	0.9052	0.2944	0.3486	1.5384	0.548	0.548	0.548	0.501	0.4809	0.5102	0.0683	0.503	0.503	0.4347	0.5788	0.5685	0.4872	0.535	0.5144	1.2078	1.1949	1.1949	1.1949	0.4119	1.4501	0.5147	0.4119	0.4935	0.4935	0.6625	0.5509	0.5541	0.4409	1.2172
CE4841[c]	-0.1492	0.3533	0.3169	0.3169	0.3169	0.3313	0.3313	0.3416	0.3317	0.3173	0.3173	0.4849	0.2906	0.4501	0.3169	0.9052	0.2944	0.3486	1.5384	0.548	0.548	0.548	0.501	0.4809	0.5102	0.0683	0.503	0.503	0.4347	0.5788	0.5685	0.4872	0.535	0.5144	1.2078	1.1949	1.1949	1.1949	0.4119	1.4501	0.5147	0.4119	0.4935	0.4935	0.6625	0.5509	0.5541	0.4409	1.2172
CE4842[c]	-0.1492	0.3533	0.3169	0.3169	0.3169	0.3313	0.3313	0.3416	0.3317	0.3173	0.3173	0.4849	0.2906	0.4501	0.3169	0.9052	0.2944	0.3486	1.5384	0.548	0.548	0.548	0.5012	0.4809	0.5103	0.0685	0.503	0.503	0.4347	0.5788	0.5685	0.4872	0.535	0.5144	1.2078	1.1949	1.1949	1.1949	0.4119	1.4501	0.5147	0.4119	0.4935	0.4935	0.6625	0.5509	0.5541	0.4409	1.2173
CE4843[c][m][r]	-0.1492	0.353	0.3169	0.3169	0.3169	0.3313	0.3313	0.3416	0.3317	0.3173	0.3173	0.4849	0.2906	0.4501	0.3169	0.9052	0.2944	0.3486	1.5384	0.548	0.548	0.548	0.5011	0.4809	0.5103	0.0685	0.503	0.503	0.4347	0.5788	0.5685	0.4872	0.535	0.5144	1.2078	1.1949	1.1949	1.1949	0.4119	1.4499	0.5147	0.4119	0.4935	0.4935	0.6625	0.5509	0.5538	0.4409	1.2173
CE4844[c]	-0.1492	0.3533	0.3169	0.3169	0.3169	0.3313	0.3313	0.3416	0.3317	0.3173	0.3173	0.4849	0.2906	0.4501	0.3169	0.9052	0.2944	0.3486	1.5384	0.548	0.548	0.548	0.501	0.4809	0.5102	0.0683	0.503	0.503	0.4347	0.5788	0.5685	0.4872	0.535	0.5144	1.2078	1.1949	1.1949	1.1949	0.4119	1.4501	0.5147	0.4119	0.4935	0.4935	0.6625	0.5509	0.5541	0.4409	1.2172
CE4845[c]	-0.1492	0.3533	0.3169	0.3169	0.3169	0.3313	0.3313	0.3416	0.3317	0.3173	0.3173	0.4849	0.2906	0.4501	0.3169	0.9052	0.2944	0.3486	1.5384	0.548	0.548	0.548	0.501	0.4809	0.5102	0.0683	0.503	0.503	0.4347	0.5788	0.5685	0.4872	0.535	0.5144	1.2078	1.1949	1.1949	1.1949	0.4119	1.4501	0.5147	0.4119	0.4935	0.4935	0.6625	0.5509	0.5541	0.4409	1.2172
CE4846[c]	-0.1492	0.3533	0.3169	0.3169	0.3169	0.3313	0.3313	0.3416	0.3317	0.3173	0.3173	0.4849	0.2906	0.4501	0.3169	0.9052	0.2944	0.3486	1.5384	0.548	0.548	0.548	0.501	0.4809	0.5102	0.0683	0.503	0.503	0.4347	0.5788	0.5685	0.4872	0.535	0.5144	1.2078	1.1949	1.1949	1.1949	0.4119	1.4501	0.5147	0.4119	0.4935	0.4935	0.6625	0.5509	0.5541	0.4409	1.2172
CE4847[c][m]	-0.1492	0.3533	0.3169	0.3169	0.3169	0.3313	0.3313	0.3416	0.3317	0.3173	0.3173	0.4849	0.2906	0.4501	0.3169	0.9052	0.2944	0.3486	1.5384	0.548	0.548	0.548	0.501	0.4809	0.5102	0.0683	0.503	0.503	0.4347	0.5788	0.5685	0.4872	0.535	0.5144	1.2078	1.1949	1.1949	1.1949	0.4119	1.4501	0.5147	0.4119	0.4935	0.4935	0.6625	0.5509	0.5541	0.4409	1.2172
CE4848[c]	-0.1492	0.3529	0.3169	0.3169	0.3169	0.3313	0.3313	0.3416	0.3317	0.3169	0.3169	0.4846	0.2906	0.4501	0.3169	0.9052	0.2944	0.3486	1.5384	0.5477	0.5477	0.5477	0.501	0.4809	0.5102	0.0683	0.503	0.503	0.4347	0.5788	0.5685	0.4872	0.5347	0.5141	1.2078	1.1949	1.1949	1.1949	0.4119	1.4499	0.5144	0.4119	0.4935	0.4935	0.6622	0.5506	0.5537	0.4409	1.2172
CE4849[c]	-0.1492	0.353	0.3169	0.3168	0.3169	0.3313	0.3313	0.3416	0.3317	0.3172	0.3172	0.4849	0.2906	0.4501	0.3169	0.9051	0.2944	0.3486	1.5383	0.5478	0.5478	0.5478	0.5011	0.4809	0.5102	0.0683	0.5029	0.5029	0.4347	0.5787	0.5685	0.4871	0.5348	0.5143	1.2078	1.1949	1.1949	1.1949	0.4119	1.45	0.5146	0.4119	0.4935	0.4935	0.6625	0.5508	0.5538	0.4409	1.2173
CE4850[c]	-0.1492	0.3529	0.3169	0.3169	0.3169	0.3313	0.3313	0.3416	0.3317	0.3169	0.3169	0.4846	0.2906	0.4501	0.3169	0.9052	0.2944	0.3486	1.5384	0.5477	0.5477	0.5477	0.501	0.4809	0.5102	0.0683	0.503	0.503	0.4347	0.5788	0.5685	0.4872	0.5347	0.5141	1.2078	1.1949	1.1949	1.1949	0.4119	1.4499	0.5144	0.4119	0.4935	0.4935	0.6622	0.5506	0.5537	0.4409	1.2172
CE4851[c]	-0.1492	0.3533	0.3169	0.3169	0.3169	0.3313	0.3313	0.3416	0.3317	0.3173	0.3173	0.4849	0.2906	0.4501	0.3169	0.9052	0.2944	0.3486	1.5384	0.548	0.548	0.548	0.5014	0.4809	0.5102	0.0683	0.503	0.503	0.4347	0.5788	0.5685	0.4872	0.535	0.5144	1.2078	1.1949	1.1949	1.1949	0.4119	1.4501	0.5147	0.4119	0.4935	0.4935	0.6625	0.5509	0.5541	0.4409	1.2174
CE4852[c]	-0.1492	0.3529	0.3169	0.3169	0.3169	0.3313	0.3313	0.3416	0.3317	0.3169	0.3169	0.4846	0.2906	0.4501	0.3169	0.9052	0.2944	0.3486	1.5384	0.5477	0.5477	0.5477	0.501	0.4809	0.5102	0.0683	0.503	0.503	0.4347	0.5788	0.5685	0.4872	0.5347	0.5141	1.2078	1.1949	1.1949	1.1949	0.4119	1.4499	0.5144	0.4119	0.4935	0.4935	0.6622	0.5506	0.5537	0.4409	1.2172
CE4853[c]	-0.1492	0.3529	0.3169	0.3165	0.3169	0.3313	0.3313	0.3416	0.3317	0.3169	0.3169	0.4849	0.2906	0.4501	0.3169	0.905	0.2944	0.3486	1.5382	0.5477	0.5477	0.5477	0.501	0.4809	0.5102	0.0683	0.5027	0.5027	0.4347	0.5785	0.5685	0.4869	0.5347	0.5141	1.2078	1.1949	1.1949	1.1949	0.4119	1.4499	0.5144	0.4119	0.4935	0.4935	0.6625	0.5506	0.5537	0.4409	1.2172
CE4854[c][m]	-0.1492	0.3532	0.3169	0.3169	0.3169	0.3313	0.3313	0.3416	0.3317	0.3172	0.3172	0.4848	0.2906	0.4501	0.3169	0.9052	0.2944	0.3486	1.5384	0.5479	0.5479	0.5479	0.5012	0.4809	0.5102	0.0683	0.503	0.503	0.4347	0.5788	0.5685	0.4872	0.5349	0.5143	1.2078	1.1949	1.1949	1.1949	0.4119	1.45	0.5146	0.4119	0.4935	0.4935	0.6624	0.5508	0.554	0.4409	1.2174
CE4855[c][x]	-0.1492	0.3529	0.3167	0.3165	0.3167	0.3313	0.3313	0.3416	0.3315	0.3169	0.3169	0.4847	0.2906	0.4501	0.3169	0.905	0.2944	0.3486	1.5383	0.5475	0.5475	0.5475	0.5008	0.4807	0.5099	0.0683	0.5024	0.5024	0.4347	0.5783	0.5681	0.4869	0.5345	0.5138	1.2077	1.1948	1.1948	1.1948	0.4117	1.4499	0.5144	0.4117	0.4933	0.4933	0.6621	0.5506	0.5537	0.4406	1.2172
CE4872[c][m]	1.4086	1.017	1.018	1.018	1.018	1.018	1.018	1.018	1.018	1.018	1.018	1.018	1.018	1.018	1.018	1.018	1.018	1.018	0.528	0.424	0.424	0.424	0.424	0.4322	0.424	1.4884	0.424	0.424	0.5541	0.424	0.424	0.5012	0.424	0.424	0.1991	0.1984	0.1984	0.1984	0.1983	0.1985	0.1983	0.1983	0.1983	0.1983	0.1983	0.1983	0.1983	0.1983	0.1984
CE4877[c][e]	-0.1492	0.3533	0.3169	0.3169	0.3169	0.3313	0.3313	0.3416	0.3317	0.3173	0.3173	0.4849	0.2906	0.4501	0.3169	0.9052	0.2944	0.3486	1.5384	0.548	0.548	0.548	0.5014	0.4809	0.5102	0.0683	0.503	0.503	0.4347	0.5788	0.5685	0.4872	0.535	0.5144	1.2078	1.1949	1.1949	1.1949	0.4119	1.4501	0.5147	0.4119	0.4935	0.4935	0.6625	0.5509	0.5541	0.4409	1.2172
CE4888[c]	1.0138	0.5212	0.519	0.519	0.519	0.519	0.519	0.519	0.519	0.519	0.519	0.519	0.519	0.519	0.519	0.519	0.519	0.519	0.5278	0.424	0.424	0.424	0.424	0.4322	0.424	1.171	0.424	0.424	0.5541	0.424	0.424	0.5012	0.424	0.424	0.1989	0.1983	0.1983	0.1983	0.1983	0.1983	0.1983	0.1983	0.1983	0.1983	0.1983	0.1983	0.1983	0.1983	0.1983
CE4987[c]	0.9661	2.1166	1.2116	1.2116	1.2116	1.2116	1.2116	1.2116	1.2116	1.2116	1.2116	1.2116	1.2116	1.2116	1.2116	1.2116	1.2116	1.2116	2.7453	-0.3133	-0.3133	-0.3133	-0.3133	-0.0719	-0.3133	1.1145	-0.3133	-0.3133	0.9805	-0.3133	-0.3133	1.4757	-0.3133	-0.3133	0.4736	-0.3787	-0.3787	-0.3787	-0.3787	-0.3787	-0.3787	-0.3787	-0.3787	-0.3787	-0.3787	-0.3787	-0.3787	-0.3787	-0.3787
CE4988[c][m][x]	0.9635	2.1132	1.2094	1.2094	1.2094	1.2095	1.2095	1.2095	1.2095	1.2094	1.2094	1.2097	1.2094	1.2097	1.2094	1.2107	1.2094	1.2095	2.7426	-0.3094	-0.3094	-0.3094	-0.3097	-0.0696	-0.3096	1.112	-0.3097	-0.3097	0.9789	-0.3092	-0.3093	1.4733	-0.3095	-0.3096	0.4767	-0.3693	-0.3693	-0.3693	-0.3752	-0.3666	-0.3746	-0.3752	-0.3748	-0.3748	-0.3737	-0.3744	-0.3744	-0.3751	-0.3691
CE4990[c][m][x]	3.0403	3.342	3.0286	3.0286	3.0286	3.0286	3.0286	3.0286	3.0286	3.0286	3.0286	3.0287	3.0286	3.0287	3.0286	3.0288	3.0286	3.0287	2.7435	-0.3107	-0.3107	-0.3107	-0.3109	-0.0704	-0.3109	2.9325	-0.3109	-0.3109	0.9794	-0.3106	-0.3106	1.4741	-0.3108	-0.3109	0.4757	-0.3724	-0.3724	-0.3724	-0.3764	-0.3706	-0.376	-0.3764	-0.3761	-0.3761	-0.3754	-0.3758	-0.3758	-0.3763	-0.3723
CE5021[c]	-0.1492	0.3533	0.3169	0.3169	0.3169	0.3317	0.3313	0.342	0.3317	0.3173	0.3173	0.4849	0.2906	0.4501	0.3169	0.9052	0.2944	0.3486	1.5384	0.548	0.548	0.548	0.5014	0.4809	0.5105	0.0683	0.503	0.503	0.4347	0.5788	0.5685	0.4872	0.535	0.5144	1.208	1.1951	1.1951	1.1951	0.4119	1.4501	0.5147	0.4119	0.4935	0.4935	0.6625	0.5509	0.5541	0.4409	1.2174
CE5022[c]	-0.1492	0.3533	0.3169	0.3169	0.3169	0.3317	0.3313	0.342	0.3317	0.3173	0.3173	0.4849	0.2906	0.4501	0.3169	0.9052	0.2944	0.3486	1.5384	0.548	0.548	0.548	0.5014	0.4809	0.5105	0.0683	0.503	0.503	0.4347	0.5788	0.5685	0.4872	0.535	0.5144	1.208	1.1951	1.1951	1.1951	0.4119	1.4501	0.5147	0.4119	0.4935	0.4935	0.6625	0.5509	0.5541	0.4409	1.2174
CE5025[c][e]	-0.1492	0.3529	0.3169	0.3169	0.3169	0.3313	0.3313	0.3416	0.3317	0.3169	0.3169	0.4849	0.2906	0.4501	0.3169	0.9052	0.2944	0.3486	1.5384	0.548	0.548	0.548	0.501	0.4809	0.5102	0.0683	0.503	0.503	0.4347	0.5788	0.5685	0.4872	0.5347	0.5144	1.2078	1.1949	1.1949	1.1949	0.4119	1.4499	0.5144	0.4119	0.4935	0.4935	0.6625	0.5506	0.5537	0.4409	1.2172
CE5026[c][e]	-1.1492	0.3533	0.3169	0.3169	0.3169	0.3317	0.3313	0.3416	0.3317	0.3173	0.3173	0.4849	0.2906	0.4501	0.3169	0.9052	0.2944	0.3486	1.5384	0.548	0.548	0.548	0.5014	0.4809	0.5103	0.0688	0.503	0.503	0.4349	0.5788	0.5685	0.4872	0.535	0.5144	1.2078	1.195	1.195	1.195	0.4119	1.4501	0.5147	0.4119	0.4935	0.4935	0.6625	0.5509	0.5541	0.4409	1.2174
CE5101[m]	-14.6564	-14.1539	-14.1902	-14.1902	-14.1902	-14.1754	-14.1758	-14.1655	-14.1754	-14.1898	-14.1898	-14.0222	-14.2165	-14.0571	-14.1902	-13.6019	-14.2127	-14.1586	-12.9688	-13.9591	-13.9591	-13.9591	-14.0058	-14.0262	-13.9966	-14.4384	-14.0041	-14.0041	-14.0724	-13.9284	-13.9386	-14.0199	-13.9721	-13.9927	-13.2993	-13.3122	-13.3122	-13.3122	-14.0952	-13.0571	-13.9924	-14.0952	-14.0137	-14.0137	-13.8446	-13.9562	-13.9531	-14.0663	-13.2897
CE5114[c][m][x]	-0.1492	0.3529	0.3169	0.3168	0.3169	0.3313	0.3313	0.3416	0.3316	0.3172	0.3172	0.4848	0.2906	0.4501	0.3169	0.9051	0.2944	0.3486	1.5384	0.5479	0.5479	0.5479	0.501	0.4809	0.5102	0.0682	0.503	0.503	0.4347	0.5787	0.5685	0.4872	0.5349	0.5143	1.2078	1.1949	1.1949	1.1949	0.4119	1.45	0.5146	0.4119	0.4934	0.4934	0.6622	0.5508	0.5537	0.4408	1.2172
CE5116[m][x]	-0.1492	0.3529	0.3169	0.3169	0.3169	0.3313	0.3313	0.3416	0.3317	0.3173	0.3173	0.4849	0.2906	0.4501	0.3169	0.9052	0.2944	0.3486	1.5384	0.548	0.548	0.548	0.501	0.4809	0.5102	0.0683	0.503	0.503	0.4347	0.5788	0.5685	0.4872	0.535	0.5144	1.2078	1.1949	1.1949	1.1949	0.4119	1.4501	0.5147	0.4119	0.4935	0.4935	0.6622	0.5509	0.5537	0.4409	1.2172
CE5117[m]	-0.1492	0.3533	0.3169	0.3169	0.3169	0.3313	0.3313	0.3416	0.3317	0.3173	0.3173	0.4849	0.2906	0.4501	0.3169	0.9052	0.2944	0.3486	1.5384	0.548	0.548	0.548	0.5014	0.4809	0.5105	0.0688	0.503	0.503	0.4347	0.5788	0.5685	0.4872	0.535	0.5144	1.2078	1.1949	1.1949	1.1949	0.4119	1.4501	0.5147	0.4119	0.4935	0.4935	0.6625	0.5509	0.5541	0.4409	1.2174
CE5118[m]	-0.1492	0.3533	0.3169	0.3169	0.3169	0.3313	0.3313	0.3416	0.3317	0.3173	0.3173	0.4849	0.2906	0.4501	0.3169	0.9052	0.2944	0.3486	1.5384	0.548	0.548	0.548	0.5014	0.4809	0.5105	0.0688	0.503	0.503	0.4347	0.5788	0.5685	0.4872	0.535	0.5144	1.2078	1.1949	1.1949	1.1949	0.4119	1.4501	0.5147	0.4119	0.4935	0.4935	0.6625	0.5509	0.5541	0.4409	1.2174
CE5119[m]	-0.1492	0.3533	0.3169	0.3169	0.3169	0.3313	0.3313	0.3416	0.3317	0.3173	0.3173	0.4849	0.2906	0.4501	0.3169	0.9052	0.2944	0.3486	1.5384	0.548	0.548	0.548	0.5014	0.4809	0.5105	0.0688	0.503	0.503	0.4347	0.5788	0.5685	0.4872	0.535	0.5144	1.2078	1.1949	1.1949	1.1949	0.4119	1.4501	0.5147	0.4119	0.4935	0.4935	0.6625	0.5509	0.5541	0.4409	1.2174
CE5120[m]	-0.1492	0.3533	0.3169	0.3169	0.3169	0.3313	0.3313	0.3416	0.3317	0.3173	0.3173	0.4849	0.2906	0.4501	0.3169	0.9052	0.2944	0.3486	1.5384	0.548	0.548	0.548	0.5014	0.4809	0.5105	0.0688	0.503	0.503	0.4347	0.5788	0.5685	0.4872	0.535	0.5144	1.2078	1.1949	1.1949	1.1949	0.4119	1.4501	0.5147	0.4119	0.4935	0.4935	0.6625	0.5509	0.5541	0.4409	1.2174
CE5125[x]	-0.1492	0.3533	0.3169	0.3169	0.3169	0.3313	0.3313	0.3416	0.3317	0.3173	0.3173	0.4849	0.2906	0.4501	0.3169	0.9052	0.2944	0.3486	1.5384	0.548	0.548	0.548	0.501	0.4809	0.5102	0.0683	0.503	0.503	0.4347	0.5788	0.5685	0.4872	0.535	0.5144	1.2078	1.1949	1.1949	1.1949	0.4119	1.4501	0.5147	0.4119	0.4935	0.4935	0.6625	0.5509	0.5541	0.4409	1.2172
CE5126[x]	-0.1492	0.3533	0.3169	0.3169	0.3169	0.3313	0.3313	0.3416	0.3317	0.3173	0.3173	0.4847	0.2906	0.4501	0.3169	0.9052	0.2944	0.3486	1.5384	0.548	0.548	0.548	0.501	0.4809	0.5102	0.0683	0.503	0.503	0.4347	0.5788	0.5685	0.4872	0.535	0.5144	1.2078	1.1949	1.1949	1.1949	0.4119	1.4501	0.5147	0.4119	0.4935	0.4935	0.6625	0.5509	0.5541	0.4409	1.2172
CE5144[c][m][x]	-0.1492	0.3533	0.3169	0.3169	0.3169	0.3313	0.3313	0.3416	0.3317	0.3173	0.3173	0.4849	0.2906	0.4501	0.3169	0.9052	0.2944	0.3486	1.5384	0.548	0.548	0.548	0.5014	0.4809	0.5102	0.0683	0.503	0.503	0.4347	0.5788	0.5685	0.4872	0.535	0.5144	1.2078	1.1949	1.1949	1.1949	0.4119	1.4501	0.5147	0.4119	0.4935	0.4935	0.6625	0.5509	0.5541	0.4409	1.2172
CE5148[c][m][x]	-0.1492	0.3533	0.3169	0.3169	0.3169	0.3313	0.3313	0.3416	0.3317	0.3173	0.3173	0.4849	0.2906	0.4501	0.3169	0.9052	0.2944	0.3486	1.5384	0.548	0.548	0.548	0.5014	0.4809	0.5102	0.0683	0.503	0.503	0.4347	0.5788	0.5685	0.4872	0.535	0.5144	1.2078	1.1949	1.1949	1.1949	0.4119	1.4501	0.5147	0.4119	0.4935	0.4935	0.6625	0.5509	0.5541	0.4409	1.2172
CE5150[c][m][x]	-0.1492	0.3533	0.3169	0.3169	0.3169	0.3313	0.3313	0.3416	0.3317	0.3173	0.3173	0.4849	0.2906	0.4501	0.3169	0.9052	0.2944	0.3486	1.5384	0.548	0.548	0.548	0.5014	0.4809	0.5102	0.0683	0.503	0.503	0.4347	0.5788	0.5685	0.4872	0.535	0.5144	1.2078	1.1949	1.1949	1.1949	0.4119	1.4501	0.5147	0.4119	0.4935	0.4935	0.6625	0.5509	0.5541	0.4409	1.2172
CE5151[c][m][r][x]	-0.1492	0.3532	0.3168	0.3168	0.3168	0.3313	0.3313	0.3416	0.3316	0.3172	0.3172	0.4848	0.2906	0.4501	0.3169	0.9052	0.2944	0.3486	1.5383	0.548	0.548	0.548	0.5013	0.4808	0.5103	0.0685	0.5029	0.5029	0.4347	0.5787	0.5684	0.4871	0.5349	0.5143	1.2078	1.1949	1.1949	1.1949	0.4118	1.45	0.5146	0.4118	0.4934	0.4934	0.6625	0.5508	0.554	0.4408	1.2173
CE5152[c][m][x]	-0.1492	0.3533	0.3169	0.3169	0.3169	0.3317	0.3313	0.3416	0.3317	0.3173	0.3173	0.4849	0.2906	0.4501	0.3169	0.9052	0.2944	0.3486	1.5385	0.548	0.548	0.548	0.5014	0.4809	0.5105	0.0683	0.503	0.503	0.4347	0.5788	0.5685	0.4872	0.535	0.5144	1.2078	1.1949	1.1949	1.1949	0.4119	1.4501	0.5147	0.4119	0.4935	0.4935	0.6625	0.5509	0.5541	0.4409	1.2174
CE5153[c][m][x]	-0.1492	0.3533	0.3169	0.3169	0.3169	0.3317	0.3313	0.3416	0.3317	0.3173	0.3173	0.4849	0.2906	0.4501	0.3169	0.9052	0.2944	0.3486	1.5385	0.548	0.548	0.548	0.5014	0.4809	0.5105	0.0683	0.503	0.503	0.4347	0.5788	0.5685	0.4872	0.535	0.5144	1.2078	1.1949	1.1949	1.1949	0.4119	1.4501	0.5147	0.4119	0.4935	0.4935	0.6625	0.5509	0.5541	0.4409	1.2174
CE5154[c][m][x]	-0.1492	0.3533	0.3169	0.3169	0.3169	0.3317	0.3313	0.3416	0.3317	0.3173	0.3173	0.4849	0.2906	0.4501	0.3169	0.9052	0.2944	0.3486	1.5385	0.548	0.548	0.548	0.5014	0.4809	0.5105	0.0683	0.503	0.503	0.4347	0.5788	0.5685	0.4872	0.535	0.5144	1.2078	1.1949	1.1949	1.1949	0.4119	1.4501	0.5147	0.4119	0.4935	0.4935	0.6625	0.5509	0.5541	0.4409	1.2174
CE5155[c][m][r][x]	-0.1491	0.3533	0.3169	0.3169	0.3169	0.3317	0.3315	0.3417	0.3317	0.3173	0.3173	0.4848	0.2908	0.4501	0.3169	0.9053	0.2945	0.3487	1.5383	0.5478	0.5478	0.5478	0.5011	0.4807	0.5103	0.0684	0.5028	0.5028	0.4347	0.5786	0.5684	0.487	0.5348	0.5142	1.208	1.1951	1.1951	1.1951	0.4119	1.4501	0.5147	0.4119	0.4935	0.4935	0.6626	0.5509	0.5541	0.4409	1.2174
CE5156[c][x]	-0.1492	0.3529	0.3169	0.3169	0.3169	0.3313	0.3313	0.3416	0.3317	0.3173	0.3173	0.4849	0.2906	0.4501	0.3169	0.9052	0.2944	0.3486	1.5384	0.548	0.548	0.548	0.501	0.4809	0.5102	0.0683	0.503	0.503	0.4347	0.5788	0.5685	0.4872	0.535	0.5144	1.2078	1.1949	1.1949	1.1949	0.4119	1.4501	0.5147	0.4119	0.4935	0.4935	0.6625	0.5509	0.5537	0.4409	1.2172
CE5157[c][x]	-0.1492	0.3529	0.3169	0.3169	0.3169	0.3313	0.3313	0.3416	0.3317	0.3173	0.3173	0.4849	0.2906	0.4501	0.3169	0.9052	0.2944	0.3486	1.5384	0.548	0.548	0.548	0.501	0.4809	0.5102	0.0683	0.503	0.503	0.4347	0.5788	0.5685	0.4872	0.535	0.5144	1.2078	1.1949	1.1949	1.1949	0.4119	1.4501	0.5147	0.4119	0.4935	0.4935	0.6625	0.5509	0.5537	0.4409	1.2172
CE5158[c][x]	-0.1492	0.3529	0.3169	0.3169	0.3169	0.3313	0.3313	0.3416	0.3317	0.3173	0.3173	0.4849	0.2906	0.4501	0.3169	0.9052	0.2944	0.3486	1.5384	0.548	0.548	0.548	0.501	0.4809	0.5102	0.0683	0.503	0.503	0.4347	0.5788	0.5685	0.4872	0.535	0.5144	1.2078	1.1949	1.1949	1.1949	0.4119	1.4501	0.5147	0.4119	0.4935	0.4935	0.6625	0.5509	0.5537	0.4409	1.2172
CE5160[c]	-0.1492	0.3533	0.3169	0.3169	0.3169	0.3313	0.3313	0.3416	0.3317	0.3173	0.3173	0.4849	0.2906	0.4501	0.3169	0.9052	0.2944	0.3486	1.5384	0.548	0.548	0.548	0.5014	0.4809	0.5102	0.0688	0.503	0.503	0.4347	0.5788	0.5685	0.4872	0.535	0.5144	1.2078	1.1949	1.1949	1.1949	0.4119	1.4501	0.5147	0.4119	0.4935	0.4935	0.6625	0.5509	0.5541	0.4409	1.2174
CE5161[c]	-0.1492	0.3533	0.3169	0.3169	0.3169	0.3313	0.3313	0.3416	0.3317	0.3173	0.3173	0.4849	0.2906	0.4501	0.3169	0.9052	0.2944	0.3486	1.5384	0.548	0.548	0.548	0.5014	0.4809	0.5102	0.0688	0.503	0.503	0.4347	0.5788	0.5685	0.4872	0.535	0.5144	1.2078	1.1949	1.1949	1.1949	0.4119	1.4501	0.5147	0.4119	0.4935	0.4935	0.6625	0.5509	0.5541	0.4409	1.2174
CE5162[c]	-0.1492	0.3533	0.3169	0.3169	0.3169	0.3313	0.3313	0.3416	0.3317	0.3173	0.3173	0.4849	0.2906	0.4501	0.3169	0.9052	0.2944	0.3486	1.5384	0.548	0.548	0.548	0.5014	0.4809	0.5102	0.0688	0.503	0.503	0.4347	0.5788	0.5685	0.4872	0.535	0.5144	1.2078	1.1949	1.1949	1.1949	0.4119	1.4501	0.5147	0.4119	0.4935	0.4935	0.6625	0.5509	0.5541	0.4409	1.2174
CE5166[m][x]	-0.1492	0.3533	0.3169	0.3169	0.3169	0.3317	0.3313	0.3416	0.3317	0.3173	0.3173	0.4849	0.2906	0.4501	0.3169	0.9052	0.2944	0.3486	1.5384	0.548	0.548	0.548	0.5014	0.4809	0.5105	0.0688	0.503	0.503	0.4347	0.5788	0.5685	0.4872	0.535	0.5144	1.2078	1.1949	1.1949	1.1949	0.4119	1.4501	0.5147	0.4119	0.4935	0.4935	0.6625	0.5509	0.5541	0.4409	1.2174
CE5178[c]	-0.1492	0.3533	0.3169	0.3169	0.3169	0.3313	0.3313	0.3416	0.3317	0.3173	0.3173	0.4849	0.2906	0.4501	0.3169	0.9052	0.2944	0.3486	1.5384	0.548	0.548	0.548	0.5012	0.4809	0.5104	0.0686	0.503	0.503	0.4347	0.5788	0.5685	0.4872	0.535	0.5144	1.2078	1.1949	1.1949	1.1949	0.4119	1.4501	0.5147	0.4119	0.4935	0.4935	0.6625	0.5509	0.5541	0.4409	1.2174
CE5236[n]	-0.1492	0.3533	0.3169	0.3169	0.3169	0.3317	0.3313	0.3416	0.3317	0.3173	0.3173	0.4849	0.2906	0.4501	0.3169	0.9052	0.2944	0.3486	1.5384	0.548	0.548	0.548	0.5014	0.4809	0.5105	0.0688	0.503	0.503	0.4347	0.5788	0.5685	0.4872	0.535	0.5144	1.2078	1.1949	1.1949	1.1949	0.4119	1.4501	0.5147	0.4119	0.4935	0.4935	0.6625	0.5509	0.5541	0.4409	1.2174
CE5253[c][l]	-0.1502	0.3514	0.3152	0.3152	0.3152	0.3302	0.33	0.3403	0.3302	0.3158	0.3158	0.4812	0.2895	0.4477	0.3154	0.9026	0.2933	0.3474	1.5386	0.5493	0.5493	0.5493	0.5024	0.4797	0.5115	0.0622	0.5044	0.5044	0.4339	0.5795	0.5694	0.4873	0.5363	0.5158	1.211	1.1982	1.1982	1.1982	0.415	1.4532	0.5179	0.415	0.4967	0.4967	0.6642	0.5539	0.5567	0.444	1.2205
CE5276[c]	-0.1492	0.3529	0.3169	0.3169	0.3169	0.3313	0.3313	0.3416	0.3317	0.3169	0.3169	0.4849	0.2906	0.4501	0.3169	0.9052	0.2944	0.3486	1.5384	0.548	0.548	0.548	0.501	0.4809	0.5102	0.0683	0.503	0.503	0.4347	0.5788	0.5685	0.4872	0.5347	0.5144	1.2078	1.1949	1.1949	1.1949	0.4119	1.4499	0.5144	0.4119	0.4935	0.4935	0.6625	0.5506	0.5537	0.4409	1.2172
CE5626[c]	-0.1492	0.3533	0.3169	0.3169	0.3169	0.3317	0.3313	0.3416	0.3317	0.3173	0.3173	0.4849	0.2906	0.4501	0.3169	0.9052	0.2944	0.3486	1.5384	0.548	0.548	0.548	0.5014	0.4809	0.5102	0.0683	0.503	0.503	0.4347	0.5788	0.5685	0.4872	0.535	0.5144	1.2078	1.1949	1.1949	1.1949	0.4119	1.4501	0.5147	0.4119	0.4935	0.4935	0.6625	0.5509	0.5541	0.4409	1.2174
CE5629[c][e]	-0.1492	0.3533	0.3169	0.3169	0.3169	0.3317	0.3313	0.3416	0.3317	0.3173	0.3173	0.4849	0.2906	0.4501	0.3169	0.9052	0.2944	0.3486	1.5384	0.548	0.548	0.548	0.5014	0.4809	0.5102	0.0683	0.503	0.503	0.4347	0.5788	0.5685	0.4872	0.535	0.5144	1.2078	1.1949	1.1949	1.1949	0.4119	1.4501	0.5147	0.4119	0.4935	0.4935	0.6625	0.5509	0.5541	0.4409	1.2174
CE5665[c]	1.0138	0.5212	0.519	0.519	0.519	0.519	0.519	0.519	0.519	0.519	0.519	0.519	0.519	0.519	0.519	0.519	0.519	0.519	0.5278	0.424	0.424	0.424	0.424	0.4322	0.424	1.171	0.424	0.424	0.5541	0.424	0.424	0.5012	0.424	0.424	0.1989	0.1983	0.1983	0.1983	0.1983	0.1983	0.1983	0.1983	0.1983	0.1983	0.1983	0.1983	0.1983	0.1983	0.1983
CE5853[c]	-0.1492	0.3529	0.3169	0.3165	0.3169	0.3313	0.3313	0.3416	0.3313	0.3169	0.3169	0.4846	0.2906	0.4501	0.3169	0.905	0.2944	0.3486	1.5385	0.548	0.548	0.548	0.5014	0.4809	0.5105	0.0683	0.503	0.503	0.4347	0.5788	0.5685	0.4872	0.535	0.5144	1.2078	1.1949	1.1949	1.1949	0.4119	1.4501	0.5147	0.4119	0.4935	0.4935	0.6625	0.5509	0.5541	0.4409	1.2172
CE5854[c]	-0.1492	0.3529	0.3169	0.3165	0.3169	0.3313	0.3313	0.3416	0.3313	0.3169	0.3169	0.4846	0.2906	0.4501	0.3169	0.905	0.2944	0.3486	1.5385	0.548	0.548	0.548	0.5014	0.4809	0.5105	0.0683	0.503	0.503	0.4347	0.5788	0.5685	0.4872	0.535	0.5144	1.2078	1.1949	1.1949	1.1949	0.4119	1.4501	0.5147	0.4119	0.4935	0.4935	0.6625	0.5509	0.5541	0.4409	1.2172
CE5934[x]	-0.1492	0.3533	0.3169	0.3169	0.3169	0.3313	0.3313	0.3416	0.3317	0.3173	0.3173	0.4849	0.2906	0.4501	0.3169	0.9052	0.2944	0.3486	1.5384	0.548	0.548	0.548	0.5014	0.4809	0.5102	0.0683	0.503	0.503	0.4347	0.5788	0.5685	0.4872	0.535	0.5144	1.2078	1.1949	1.1949	1.1949	0.4119	1.4501	0.5147	0.4119	0.4935	0.4935	0.6625	0.5509	0.5541	0.4409	1.2174
CE5944[c][m][x]	0.9644	2.1143	1.2102	1.2102	1.2102	1.2102	1.2102	1.2102	1.2102	1.2102	1.2102	1.2104	1.2101	1.2103	1.2102	1.211	1.2101	1.2102	2.7435	-0.3107	-0.3107	-0.3107	-0.3109	-0.0704	-0.3109	1.1129	-0.3109	-0.3109	0.9794	-0.3106	-0.3106	1.4741	-0.3108	-0.3109	0.4757	-0.3724	-0.3724	-0.3724	-0.3764	-0.3706	-0.376	-0.3764	-0.3761	-0.3761	-0.3754	-0.3758	-0.3758	-0.3763	-0.3723
CE5947[c][m][x]	0.9647	2.1148	1.2105	1.2105	1.2105	1.2105	1.2105	1.2105	1.2105	1.2105	1.2105	1.2107	1.2105	1.2106	1.2105	1.2112	1.2105	1.2105	2.7439	-0.3113	-0.3113	-0.3113	-0.3114	-0.0707	-0.3114	1.1132	-0.3114	-0.3114	0.9797	-0.3112	-0.3112	1.4744	-0.3113	-0.3114	0.4752	-0.3738	-0.3738	-0.3738	-0.3769	-0.3724	-0.3766	-0.3769	-0.3767	-0.3767	-0.3761	-0.3765	-0.3765	-0.3768	-0.3737
CE6232[c]	-0.1492	0.3529	0.3169	0.3169	0.3169	0.3313	0.3313	0.3416	0.3317	0.3173	0.3173	0.4849	0.2906	0.4501	0.3169	0.9052	0.2944	0.3486	1.5384	0.548	0.548	0.548	0.501	0.4809	0.5102	0.0683	0.503	0.503	0.4347	0.5788	0.5685	0.4872	0.535	0.5144	1.2078	1.1949	1.1949	1.1949	0.4119	1.4501	0.5147	0.4119	0.4935	0.4935	0.6625	0.5509	0.5537	0.4409	1.2172
CE6234[c]	-0.1492	0.3529	0.3169	0.3169	0.3169	0.3313	0.3313	0.3416	0.3317	0.3173	0.3173	0.4849	0.2906	0.4501	0.3169	0.9052	0.2944	0.3486	1.5384	0.548	0.548	0.548	0.501	0.4809	0.5102	0.0683	0.503	0.503	0.4347	0.5788	0.5685	0.4872	0.535	0.5144	1.2078	1.1949	1.1949	1.1949	0.4119	1.4501	0.5147	0.4119	0.4935	0.4935	0.6625	0.5509	0.5537	0.4409	1.2172
CE6246[c]	-0.1492	0.3533	0.3169	0.3169	0.3169	0.3313	0.3313	0.3416	0.3317	0.3173	0.3173	0.4849	0.2906	0.4501	0.3169	0.9052	0.2944	0.3486	1.5384	0.548	0.548	0.548	0.5014	0.4809	0.5102	0.0683	0.503	0.503	0.4347	0.5788	0.5685	0.4872	0.535	0.5144	1.2078	1.1949	1.1949	1.1949	0.4119	1.4501	0.5147	0.4119	0.4935	0.4935	0.6625	0.5509	0.5541	0.4409	1.2172
CE6252[c]	-0.1492	0.3533	0.3169	0.3169	0.3169	0.3317	0.3313	0.3416	0.3317	0.3173	0.3173	0.4849	0.2906	0.4501	0.3169	0.9052	0.2944	0.3486	1.5384	0.548	0.548	0.548	0.5014	0.4809	0.5105	0.0688	0.503	0.503	0.4347	0.5788	0.5685	0.4872	0.535	0.5144	1.2078	1.1949	1.1949	1.1949	0.4119	1.4501	0.5147	0.4119	0.4935	0.4935	0.6625	0.5509	0.5541	0.4409	1.2174
CE6504[c]	-0.1492	0.3533	0.3169	0.3169	0.3169	0.3317	0.3313	0.3416	0.3317	0.3173	0.3173	0.4849	0.2906	0.4501	0.3169	0.9052	0.2944	0.3486	1.5384	0.548	0.548	0.548	0.5014	0.4809	0.5105	0.0688	0.503	0.503	0.4347	0.5788	0.5685	0.4872	0.535	0.5144	1.2078	1.1949	1.1949	1.1949	0.4119	1.4501	0.5147	0.4119	0.4935	0.4935	0.6625	0.5509	0.5541	0.4409	1.2174
CE6506[c]	-0.1492	0.3533	0.3169	0.3169	0.3169	0.3317	0.3313	0.3416	0.3317	0.3173	0.3173	0.4849	0.2906	0.4501	0.3169	0.9052	0.2944	0.3486	1.5384	0.548	0.548	0.548	0.5014	0.4809	0.5105	0.0688	0.503	0.503	0.4347	0.5788	0.5685	0.4872	0.535	0.5144	1.2078	1.1949	1.1949	1.1949	0.4119	1.4501	0.5147	0.4119	0.4935	0.4935	0.6625	0.5509	0.5541	0.4409	1.2174
CE6508[c]	-0.1492	0.3533	0.3169	0.3169	0.3169	0.3313	0.3313	0.3416	0.3317	0.3173	0.3173	0.4849	0.2906	0.4501	0.3169	0.9052	0.2944	0.3486	1.5384	0.548	0.548	0.548	0.5014	0.4809	0.5105	0.0683	0.503	0.503	0.4347	0.5788	0.5685	0.4872	0.535	0.5144	1.2078	1.1949	1.1949	1.1949	0.4119	1.4501	0.5147	0.4119	0.4935	0.4935	0.6625	0.5509	0.5541	0.4409	1.2172
CE7085[c][e]	-0.1492	0.3533	0.3169	0.3169	0.3169	0.3313	0.3313	0.3416	0.3317	0.3173	0.3173	0.4849	0.2906	0.4501	0.3169	0.9052	0.2944	0.3486	1.5384	0.548	0.548	0.548	0.5014	0.4809	0.5105	0.0683	0.503	0.503	0.4347	0.5788	0.5685	0.4872	0.535	0.5144	1.2078	1.1949	1.1949	1.1949	0.4119	1.4501	0.5147	0.4119	0.4935	0.4935	0.6625	0.5509	0.5541	0.4409	1.2172
CE7088[c]	-0.1492	0.3533	0.3169	0.3169	0.3169	0.3317	0.3313	0.3416	0.3317	0.3173	0.3173	0.4849	0.2906	0.4501	0.3169	0.9052	0.2944	0.3486	1.5384	0.548	0.548	0.548	0.5014	0.4809	0.5102	0.0688	0.503	0.503	0.4347	0.5788	0.5685	0.4872	0.535	0.5144	1.2078	1.1949	1.1949	1.1949	0.4119	1.4501	0.5147	0.4119	0.4935	0.4935	0.6625	0.5509	0.5541	0.4409	1.2174
CE7097[c][m]	-0.1474	0.3536	0.3174	0.3172	0.3174	0.3318	0.3318	0.3421	0.332	0.3174	0.3174	0.4859	0.2911	0.4507	0.3172	0.9061	0.2949	0.349	1.5386	0.5459	0.5459	0.5459	0.4994	0.4809	0.5086	0.0697	0.5011	0.5011	0.4339	0.5775	0.5671	0.4869	0.533	0.5125	1.207	1.194	1.194	1.194	0.4109	1.4491	0.5138	0.4109	0.4925	0.4925	0.6616	0.5499	0.5531	0.4398	1.2163
cgly[c][e]	4.05392e-05	0	0	0	0	0	0	0	0	0	0	0	0	0	0	0	0	0	0.6066	0.1329	0.1329	0.1329	0.1329	0.1489	0.1329	0	0.1329	0.1329	0.3579	0.1329	0.1329	0.5363	0.1329	0.1329	0.1187	0.1186	0.1186	0.1186	0.1186	0.1186	0.1186	0.1186	0.1186	0.1186	0.1186	0.1186	0.1186	0.1186	0.1186
chlstol[c][r]	1.0677	0.7133	0.7029	0.7029	0.7029	0.7029	0.7029	0.7029	0.7029	0.7029	0.7029	0.7029	0.7029	0.7029	0.7029	0.7029	0.7029	0.7029	-10.9373	-4.7403	-4.7403	-4.7403	-4.7403	-12.0044	-4.7403	1.724	-4.7403	-4.7403	-12.0478	-4.7403	-4.7403	-11.9897	-4.7403	-4.7403	-2.5506	-2.6014	-2.6014	-2.6014	-2.6014	-2.6014	-2.6014	-2.6014	-2.6014	-2.6014	-2.6014	-2.6014	-2.6014	-2.6014	-2.6014
chol[c][e][g][m][r]	0.9674	0.8222	0.8219	0.8219	0.8219	0.8219	0.8219	0.8219	0.8219	0.8219	0.8219	0.8219	0.8219	0.8219	0.8219	0.822	0.8219	0.8219	1.5632	0.3527	0.3527	0.3527	0.3527	0.4969	0.3527	1.5087	0.3527	0.3527	1.136	0.3527	0.3527	1.4415	0.3527	0.3527	0.1964	0.1966	0.1966	0.1966	0.1964	0.1966	0.1964	0.1964	0.1964	0.1964	0.1965	0.1964	0.1964	0.1964	0.1966
cholate[c][e][m][r][x]	-0.1492	0.3531	0.3169	0.3167	0.3169	0.3314	0.3313	0.3416	0.3315	0.3171	0.3171	0.4847	0.2906	0.4501	0.3169	0.9051	0.2944	0.3486	1.5383	0.5479	0.5479	0.5479	0.5011	0.4808	0.5102	0.0684	0.5028	0.5028	0.4347	0.5786	0.5683	0.487	0.5348	0.5142	1.2078	1.195	1.195	1.195	0.4119	1.45	0.5146	0.4119	0.4935	0.4935	0.6624	0.5507	0.5539	0.4409	1.2173
cholcoa[c][m][r][x]	-0.5643	0.3531	0.3169	0.3169	0.3169	0.3315	0.3313	0.3416	0.3317	0.3172	0.3172	0.4849	0.2906	0.4501	0.3169	0.9052	0.2944	0.3486	1.5384	0.548	0.548	0.548	0.5011	0.4809	0.5102	0.0684	0.503	0.503	0.4347	0.5788	0.5685	0.4872	0.5349	0.5143	1.2078	1.195	1.195	1.195	0.4119	1.45	0.5146	0.4119	0.4934	0.4934	0.6625	0.5508	0.5539	0.4408	1.2173
cholcoaone[m][x]	-0.1492	0.3533	0.3169	0.3169	0.3169	0.3313	0.3313	0.3416	0.3317	0.3173	0.3173	0.4849	0.2906	0.4501	0.3169	0.9052	0.2944	0.3486	1.5384	0.5477	0.5477	0.5477	0.501	0.4809	0.5102	0.0683	0.503	0.503	0.4347	0.5788	0.5685	0.4872	0.5347	0.5141	1.2078	1.1951	1.1951	1.1951	0.4119	1.4501	0.5147	0.4119	0.4935	0.4935	0.6625	0.5509	0.5541	0.4409	1.2174
cholcoar[c][m][r][x]	-0.7342	0.3533	0.3169	0.3169	0.3169	0.3316	0.3313	0.3416	0.3317	0.3173	0.3173	0.4849	0.2906	0.4501	0.3169	0.9052	0.2944	0.3486	1.5384	0.5479	0.5479	0.5479	0.5012	0.4809	0.5104	0.0686	0.503	0.503	0.4347	0.5788	0.5685	0.4872	0.5349	0.5143	1.2078	1.1951	1.1951	1.1951	0.4119	1.4501	0.5147	0.4119	0.4935	0.4935	0.6625	0.5509	0.5541	0.4409	1.2174
cholp[c][e][g][l]	0.9754	0.8152	0.8148	0.8148	0.8148	0.8148	0.8148	0.8148	0.8148	0.8148	0.8148	0.8148	0.8148	0.8148	0.8148	0.8149	0.8148	0.8148	1.3852	0.2338	0.2338	0.2338	0.2338	0.3677	0.2338	1.5189	0.2338	0.2338	0.9725	0.2338	0.2338	1.2672	0.2338	0.2338	0.0844	0.0846	0.0846	0.0846	0.0844	0.0846	0.0844	0.0844	0.0844	0.0844	0.0845	0.0844	0.0845	0.0844	0.0846
chsterol[c][e][g][l][m][r]	-5.1982	-0.1492	-0.155	-0.155	-0.155	-0.1549	-0.1549	-0.1548	-0.1549	-0.155	-0.155	-0.1536	-0.1552	-0.1539	-0.155	-0.1493	-0.1552	-0.1548	0.2074	0.4754	0.4754	0.4754	0.4751	0.3924	0.4752	0.2368	0.4751	0.4751	0.2199	0.4756	0.4755	0.188	0.4753	0.4752	0.5467	0.5467	0.5467	0.5467	0.5413	0.5492	0.5419	0.5413	0.5418	0.5418	0.5427	0.5421	0.5421	0.5415	0.5469
chtn[c][e]	-0.1492	0.3529	0.3169	0.3169	0.3169	0.3313	0.3313	0.3416	0.3317	0.3173	0.3173	0.4849	0.2906	0.4501	0.3169	0.9052	0.2944	0.3486	1.5384	0.548	0.548	0.548	0.501	0.4809	0.5102	0.0688	0.503	0.503	0.4347	0.5788	0.5685	0.4872	0.535	0.5144	1.2078	1.1949	1.1949	1.1949	0.4119	1.4501	0.5147	0.4119	0.4935	0.4935	0.6625	0.5509	0.5541	0.4409	1.2172
cit[c][e][m]	-0.3951	-1.2535	-1.2535	-1.2535	-1.2535	-1.2535	-1.2535	-1.2535	-1.2535	-1.2535	-1.2535	-1.2535	-1.2535	-1.2535	-1.2535	-1.2535	-1.2535	-1.2535	0.013	-0.2288	-0.2288	-0.2288	-0.2288	-0.3162	-0.2288	-1.5963	-0.2288	-0.2288	-0.252	-0.2288	-0.2288	-0.0853	-0.2288	-0.2288	-0.2908	-0.2908	-0.2908	-0.2908	-0.2908	-0.2908	-0.2908	-0.2908	-0.2908	-0.2908	-0.2908	-0.2908	-0.2908	-0.2908	-0.2908
citmcoa_L[m]	-0.1492	0.3533	0.3169	0.3169	0.3169	0.3313	0.3313	0.3416	0.3317	0.3173	0.3173	0.4849	0.2906	0.4501	0.3169	0.9052	0.2944	0.3486	1.5384	0.548	0.548	0.548	0.5014	0.4809	0.5102	0.0688	0.503	0.503	0.4347	0.5788	0.5685	0.4872	0.535	0.5144	1.2078	1.1949	1.1949	1.1949	0.4119	1.4501	0.5147	0.4119	0.4935	0.4935	0.6625	0.5509	0.5541	0.4409	1.2174
citr_L[c][e][m]	0.467	0.3706	0.3718	0.3718	0.3718	0.3718	0.3718	0.3718	0.3718	0.3718	0.3718	0.3718	0.3718	0.3718	0.3718	0.3718	0.3718	0.3718	1.1587	0.5	0.5	0.5	0.5	0.5698	0.5	-0.6198	0.5	0.5	0.9296	0.5	0.5	1.0847	0.5	0.5	0.4681	0.4683	0.4683	0.4683	0.4683	0.4683	0.4683	0.4683	0.4683	0.4683	0.4683	0.4683	0.4683	0.4683	0.4683
cl[c][e]	-0.718	-0.014	-0.0137	-0.0137	-0.0137	-0.0137	-0.0137	-0.0137	-0.0137	-0.0137	-0.0137	-0.0137	-0.0137	-0.0137	-0.0137	-0.0137	-0.0137	-0.0137	1.5433	0.7791	0.7791	0.7791	0.7791	0.8513	0.7791	-0.4192	0.7791	0.7791	1.1955	0.7791	0.7791	1.4428	0.7791	0.7791	0.6909	0.6909	0.6909	0.6909	0.6909	0.6909	0.6909	0.6909	0.6909	0.6909	0.6909	0.6909	0.6909	0.6909	0.6909
clpn_hs[c][m]	3.3591	0.3533	0.3169	0.3169	0.3169	0.3313	0.3313	0.3416	0.3317	0.3173	0.3173	0.4849	0.2906	0.4501	0.3169	0.9052	0.2944	0.3486	1.5384	0.548	0.548	0.548	0.5014	0.4809	0.5105	0.0688	0.503	0.503	0.4347	0.5788	0.5685	0.4872	0.535	0.5144	1.2078	1.1949	1.1949	1.1949	0.4119	1.4501	0.5147	0.4119	0.4935	0.4935	0.6625	0.5509	0.5541	0.4409	1.2174
clpnd[c][e][r]	-0.1492	0.3533	0.3169	0.3169	0.3169	0.3313	0.3313	0.3416	0.3317	0.3173	0.3173	0.4849	0.2906	0.4501	0.3169	0.9052	0.2944	0.3486	1.5384	0.548	0.548	0.548	0.5014	0.4809	0.5102	0.0683	0.503	0.503	0.4347	0.5788	0.5685	0.4872	0.535	0.5144	1.2078	1.1949	1.1949	1.1949	0.4119	1.4501	0.5147	0.4119	0.4935	0.4935	0.6625	0.5509	0.5541	0.4409	1.2172
clpndcoa[c][m][r][x]	-0.1492	0.3532	0.3169	0.3169	0.3169	0.3316	0.3313	0.3416	0.3317	0.3173	0.3173	0.4849	0.2906	0.4501	0.3169	0.9052	0.2944	0.3486	1.5384	0.548	0.548	0.548	0.5012	0.4809	0.5104	0.0686	0.503	0.503	0.4347	0.5788	0.5685	0.4872	0.535	0.5144	1.2078	1.1949	1.1949	1.1949	0.4119	1.45	0.5147	0.4119	0.4935	0.4935	0.6625	0.5509	0.554	0.4409	1.2174
clpndcrn[c][m]	2.5136	0.3545	0.3177	0.3177	0.3177	0.3326	0.3326	0.3428	0.3326	0.3181	0.3181	0.4839	0.2918	0.4508	0.3177	0.9044	0.2956	0.3498	1.7386	1.271	1.271	1.271	1.2463	1.2794	1.2511	0.068	1.2472	1.2472	1.5611	1.2878	1.2822	1.7767	1.2641	1.2532	1.5539	1.6631	1.6631	1.6631	1.1358	1.8686	1.1921	1.1358	1.1801	1.1801	1.2769	1.2122	1.2141	1.1514	1.6806
cmp[c][e][g][l][m][n][r]	-0.6334	-0.198	-0.198	-0.198	-0.198	-0.198	-0.198	-0.198	-0.198	-0.198	-0.198	-0.198	-0.1981	-0.198	-0.198	-0.1979	-0.1981	-0.198	1.208	-0.0609	-0.0609	-0.0609	-0.0609	0.1452	-0.0609	-0.0249	-0.0609	-0.0609	0.7833	-0.0609	-0.0609	1.088	-0.0609	-0.0609	-0.4467	-0.4467	-0.4467	-0.4467	-0.4471	-0.4466	-0.447	-0.4471	-0.447	-0.447	-0.447	-0.447	-0.447	-0.4471	-0.4467
cmpacna[c][e][g][n]	-0.1492	0.3529	0.3165	0.3165	0.3165	0.3313	0.3313	0.3416	0.3313	0.3169	0.3169	0.4846	0.2906	0.4501	0.3165	0.905	0.2944	0.3486	1.5384	0.5477	0.5477	0.5477	0.501	0.4809	0.5102	0.0683	0.5027	0.5027	0.4347	0.5785	0.5682	0.4869	0.5347	0.5141	1.2078	1.1949	1.1949	1.1949	0.4119	1.4499	0.5144	0.4119	0.4931	0.4931	0.6622	0.5506	0.5537	0.4405	1.2172
co[c][e]	-0.1492	0.3533	0.3169	0.3169	0.3169	0.3317	0.3313	0.342	0.3317	0.3173	0.3173	0.4849	0.2906	0.4501	0.3169	0.9052	0.2944	0.3489	1.5384	0.548	0.548	0.548	0.501	0.4809	0.5102	0.0688	0.503	0.503	0.4347	0.5788	0.5685	0.4872	0.535	0.5144	1.2078	1.1949	1.1949	1.1949	0.4119	1.4501	0.5147	0.4119	0.4935	0.4935	0.6625	0.5509	0.5541	0.4409	1.2174
co2[c][e][g][m][r][x]	-0.2693	-0.6045	-0.5882	-0.5882	-0.5882	-0.5882	-0.5882	-0.5882	-0.5882	-0.5882	-0.5882	-0.5882	-0.5882	-0.5882	-0.5882	-0.5881	-0.5882	-0.5882	1.2544	0.0371	0.0371	0.0371	0.0371	0.1253	0.0371	-1.0743	0.0371	0.0371	0.8392	0.0371	0.0371	1.1356	0.0371	0.0371	-0.1093	-0.1092	-0.1092	-0.1092	-0.1093	-0.1092	-0.1093	-0.1093	-0.1093	-0.1093	-0.1092	-0.1093	-0.1093	-0.1093	-0.1092
coa[c][g][l][m][r][x]	-1.1776	-0.6384	-0.6139	-0.6139	-0.6139	-0.6138	-0.6138	-0.6138	-0.6138	-0.6139	-0.6139	-0.6137	-0.6139	-0.6138	-0.6139	-0.6133	-0.6139	-0.6138	0.0749	-0.1171	-0.1171	-0.1171	-0.1171	-0.1203	-0.1171	-0.8111	-0.1171	-0.1171	0.0596	-0.1171	-0.1171	0.0814	-0.1171	-0.1171	-0.1706	-0.1637	-0.1637	-0.1637	-0.1643	-0.1634	-0.1642	-0.1643	-0.1642	-0.1642	-0.1641	-0.1642	-0.1642	-0.1643	-0.1637
coprost[c][e]	-0.1488	0.353	0.3166	0.3166	0.3166	0.3314	0.3314	0.3417	0.3314	0.317	0.317	0.4847	0.2907	0.4502	0.317	0.9052	0.2945	0.3487	1.5385	0.5479	0.5479	0.5479	0.5012	0.4807	0.5103	0.0688	0.5028	0.5028	0.4348	0.5786	0.5687	0.4873	0.5348	0.5142	1.2077	1.1948	1.1948	1.1948	0.4117	1.4498	0.5145	0.4117	0.4933	0.4933	0.6624	0.5507	0.5536	0.4406	1.2171
cpppg1[c][e]	-0.1492	0.3533	0.3169	0.3169	0.3169	0.3315	0.3313	0.3416	0.3317	0.3173	0.3173	0.4849	0.2906	0.4501	0.3169	0.9052	0.2944	0.3486	1.5384	0.548	0.548	0.548	0.5012	0.4809	0.5103	0.0685	0.503	0.503	0.4347	0.5788	0.5685	0.4872	0.535	0.5144	1.2078	1.1949	1.1949	1.1949	0.4119	1.4501	0.5147	0.4119	0.4935	0.4935	0.6625	0.5509	0.5541	0.4409	1.2173
creat[c][m]	-0.1492	0.3533	0.3169	0.3169	0.3169	0.3317	0.3313	0.3416	0.3317	0.3173	0.3173	0.4849	0.2906	0.4501	0.3169	0.9052	0.2944	0.3486	1.5384	0.548	0.548	0.548	0.5014	0.4809	0.5105	0.0688	0.503	0.503	0.4347	0.5788	0.5685	0.4872	0.535	0.5144	1.2078	1.1949	1.1949	1.1949	0.4119	1.4501	0.5147	0.4119	0.4935	0.4935	0.6625	0.5509	0.5541	0.4409	1.2174
crm_hs[c][e][g][l][r]	0.9785	0.8201	0.8197	0.8197	0.8197	0.8197	0.8197	0.8197	0.8197	0.8197	0.8197	0.8197	0.8197	0.8197	0.8197	0.8198	0.8197	0.8197	1.3874	0.2266	0.2266	0.2266	0.2266	0.3622	0.2266	1.5297	0.2266	0.2266	0.9724	0.2266	0.2266	1.2689	0.2266	0.2266	0.0762	0.0763	0.0763	0.0763	0.0762	0.0764	0.0762	0.0762	0.0762	0.0762	0.0762	0.0762	0.0762	0.0762	0.0763
crmp_hs[c][e]	-0.1492	0.3533	0.3169	0.3169	0.3169	0.3313	0.3313	0.3416	0.3317	0.3173	0.3173	0.4849	0.2906	0.4501	0.3169	0.9052	0.2944	0.3486	1.5384	0.548	0.548	0.548	0.5014	0.4809	0.5105	0.0688	0.503	0.503	0.4347	0.5788	0.5685	0.4872	0.535	0.5144	1.2078	1.1949	1.1949	1.1949	0.4119	1.4501	0.5147	0.4119	0.4935	0.4935	0.6625	0.5509	0.5541	0.4409	1.2174
crn[c][e][m][r][x]	-2.8296	-1.4126	-1.2322	-1.2322	-1.2322	-1.2319	-1.2319	-1.2317	-1.2319	-1.2322	-1.2322	-1.2291	-1.2326	-1.2298	-1.2322	-1.2197	-1.2326	-1.2316	-1.9153	-1.3093	-1.3093	-1.3093	-1.3103	-1.3717	-1.3101	-0.6717	-1.3102	-1.3102	-1.4857	-1.3086	-1.3088	-1.5227	-1.3095	-1.31	-1.3546	-1.2861	-1.2861	-1.2861	-1.3072	-1.2762	-1.3051	-1.3072	-1.3055	-1.3055	-1.3018	-1.3043	-1.3042	-1.3066	-1.2853
crtsl[c][e][m][r]	-7.6356	0.0939	0.1021	0.1021	0.1021	0.1022	0.1022	0.1023	0.1022	0.1021	0.1021	0.1033	0.102	0.103	0.1021	0.1068	0.102	0.1024	1.2624	0.9636	0.9636	0.9636	0.9634	0.7692	0.9635	-1.5936	0.9635	0.9635	0.6635	0.9638	0.9637	1.1062	0.9636	0.9635	0.9799	0.9832	0.9832	0.9832	0.9793	0.9851	0.9797	0.9793	0.9797	0.9797	0.9804	0.9799	0.9799	0.9795	0.9834
crtstrn[c][e][m]	-0.1492	0.3533	0.3169	0.3169	0.3169	0.3313	0.3313	0.3416	0.3317	0.3173	0.3173	0.4849	0.2906	0.4501	0.3169	0.9052	0.2944	0.3486	1.5384	0.548	0.548	0.548	0.5014	0.4809	0.5105	0.0688	0.503	0.503	0.4347	0.5788	0.5685	0.4872	0.535	0.5144	1.2078	1.1949	1.1949	1.1949	0.4119	1.4501	0.5147	0.4119	0.4935	0.4935	0.6625	0.5509	0.5541	0.4409	1.2174
crvnc[c][e][l][r]	1.3652	0.439	0.4414	0.4414	0.4414	0.4414	0.4414	0.4414	0.4414	0.4414	0.4414	0.4414	0.4413	0.4414	0.4414	0.4415	0.4413	0.4414	2.0066	0.6264	0.6264	0.6264	0.6264	0.8047	0.6264	0.6156	0.6264	0.6264	1.5314	0.6264	0.6264	1.8759	0.6264	0.6264	0.4977	0.4979	0.4979	0.4979	0.4977	0.498	0.4977	0.4977	0.4977	0.4977	0.4977	0.4977	0.4977	0.4977	0.4979
cs_a[l]	-0.1492	0.3533	0.3169	0.3169	0.3169	0.3317	0.3313	0.3416	0.3317	0.3173	0.3173	0.4849	0.2906	0.4501	0.3169	0.9052	0.2944	0.3486	1.5384	0.548	0.548	0.548	0.5014	0.4809	0.5105	0.0688	0.503	0.503	0.4347	0.5788	0.5685	0.4872	0.535	0.5144	1.2078	1.1949	1.1949	1.1949	0.4119	1.4501	0.5147	0.4119	0.4935	0.4935	0.6625	0.5509	0.5541	0.4409	1.2174
cs_a_deg1[l]	-0.1492	0.3533	0.3169	0.3169	0.3169	0.3317	0.3313	0.3416	0.3317	0.3173	0.3173	0.4849	0.2906	0.4501	0.3169	0.9052	0.2944	0.3486	1.5384	0.548	0.548	0.548	0.5014	0.4809	0.5105	0.0688	0.503	0.503	0.4347	0.5788	0.5685	0.4872	0.535	0.5144	1.2078	1.1949	1.1949	1.1949	0.4119	1.4501	0.5147	0.4119	0.4935	0.4935	0.6625	0.5509	0.5541	0.4409	1.2174
cs_a_deg3[l]	-0.1492	0.3533	0.3169	0.3169	0.3169	0.3317	0.3313	0.3416	0.3317	0.3173	0.3173	0.4849	0.2906	0.4501	0.3169	0.9052	0.2944	0.3486	1.5384	0.548	0.548	0.548	0.5014	0.4809	0.5105	0.0688	0.503	0.503	0.4347	0.5788	0.5685	0.4872	0.535	0.5144	1.2078	1.1949	1.1949	1.1949	0.4119	1.4501	0.5147	0.4119	0.4935	0.4935	0.6625	0.5509	0.5541	0.4409	1.2174
cs_a_deg4[l]	-0.1492	0.3533	0.3169	0.3169	0.3169	0.3317	0.3313	0.3416	0.3317	0.3173	0.3173	0.4849	0.2906	0.4501	0.3169	0.9052	0.2944	0.3486	1.5384	0.548	0.548	0.548	0.5014	0.4809	0.5105	0.0688	0.503	0.503	0.4347	0.5788	0.5685	0.4872	0.535	0.5144	1.2078	1.1949	1.1949	1.1949	0.4119	1.4501	0.5147	0.4119	0.4935	0.4935	0.6625	0.5509	0.5541	0.4409	1.2174
cs_b[l]	-0.1492	0.3533	0.3169	0.3169	0.3169	0.3317	0.3313	0.3416	0.3317	0.3173	0.3173	0.4849	0.2906	0.4501	0.3169	0.9052	0.2944	0.3486	1.5384	0.548	0.548	0.548	0.5014	0.4809	0.5105	0.0688	0.503	0.503	0.4347	0.5788	0.5685	0.4872	0.535	0.5144	1.2078	1.1949	1.1949	1.1949	0.4119	1.4501	0.5147	0.4119	0.4935	0.4935	0.6625	0.5509	0.5541	0.4409	1.2174
cs_b_deg1[l]	-0.1492	0.3533	0.3169	0.3169	0.3169	0.3317	0.3313	0.3416	0.3317	0.3173	0.3173	0.4849	0.2906	0.4501	0.3169	0.9052	0.2944	0.3486	1.5384	0.548	0.548	0.548	0.5014	0.4809	0.5105	0.0688	0.503	0.503	0.4347	0.5788	0.5685	0.4872	0.535	0.5144	1.2078	1.1949	1.1949	1.1949	0.4119	1.4501	0.5147	0.4119	0.4935	0.4935	0.6625	0.5509	0.5541	0.4409	1.2174
cs_c[l]	-0.1492	0.3533	0.3169	0.3169	0.3169	0.3317	0.3313	0.3416	0.3317	0.3173	0.3173	0.4849	0.2906	0.4501	0.3169	0.9052	0.2944	0.3486	1.5384	0.548	0.548	0.548	0.5014	0.4809	0.5105	0.0688	0.503	0.503	0.4347	0.5788	0.5685	0.4872	0.535	0.5144	1.2078	1.1949	1.1949	1.1949	0.4119	1.4501	0.5147	0.4119	0.4935	0.4935	0.6625	0.5509	0.5541	0.4409	1.2174
cs_c_deg1[l]	-0.1492	0.3533	0.3169	0.3169	0.3169	0.3317	0.3313	0.3416	0.3317	0.3173	0.3173	0.4849	0.2906	0.4501	0.3169	0.9052	0.2944	0.3486	1.5384	0.548	0.548	0.548	0.5014	0.4809	0.5105	0.0688	0.503	0.503	0.4347	0.5788	0.5685	0.4872	0.535	0.5144	1.2078	1.1949	1.1949	1.1949	0.4119	1.4501	0.5147	0.4119	0.4935	0.4935	0.6625	0.5509	0.5541	0.4409	1.2174
cs_c_deg3[l]	-0.1492	0.3533	0.3169	0.3169	0.3169	0.3317	0.3313	0.3416	0.3317	0.3173	0.3173	0.4849	0.2906	0.4501	0.3169	0.9052	0.2944	0.3486	1.5384	0.548	0.548	0.548	0.5014	0.4809	0.5105	0.0688	0.503	0.503	0.4347	0.5788	0.5685	0.4872	0.535	0.5144	1.2078	1.1949	1.1949	1.1949	0.4119	1.4501	0.5147	0.4119	0.4935	0.4935	0.6625	0.5509	0.5541	0.4409	1.2174
cs_c_deg4[l]	-0.1492	0.3533	0.3169	0.3169	0.3169	0.3317	0.3313	0.3416	0.3317	0.3173	0.3173	0.4849	0.2906	0.4501	0.3169	0.9052	0.2944	0.3486	1.5384	0.548	0.548	0.548	0.5014	0.4809	0.5105	0.0688	0.503	0.503	0.4347	0.5788	0.5685	0.4872	0.535	0.5144	1.2078	1.1949	1.1949	1.1949	0.4119	1.4501	0.5147	0.4119	0.4935	0.4935	0.6625	0.5509	0.5541	0.4409	1.2174
cs_d[l]	-0.1492	0.3533	0.3169	0.3169	0.3169	0.3317	0.3313	0.3416	0.3317	0.3173	0.3173	0.4849	0.2906	0.4501	0.3169	0.9052	0.2944	0.3486	1.5384	0.548	0.548	0.548	0.5014	0.4809	0.5105	0.0688	0.503	0.503	0.4347	0.5788	0.5685	0.4872	0.535	0.5144	1.2078	1.1949	1.1949	1.1949	0.4119	1.4501	0.5147	0.4119	0.4935	0.4935	0.6625	0.5509	0.5541	0.4409	1.2174
cs_d_deg1[l]	-0.1492	0.3533	0.3169	0.3169	0.3169	0.3317	0.3313	0.3416	0.3317	0.3173	0.3173	0.4849	0.2906	0.4501	0.3169	0.9052	0.2944	0.3486	1.5384	0.548	0.548	0.548	0.5014	0.4809	0.5105	0.0688	0.503	0.503	0.4347	0.5788	0.5685	0.4872	0.535	0.5144	1.2078	1.1949	1.1949	1.1949	0.4119	1.4501	0.5147	0.4119	0.4935	0.4935	0.6625	0.5509	0.5541	0.4409	1.2174
cs_d_deg4[l]	-0.1492	0.3533	0.3169	0.3169	0.3169	0.3317	0.3313	0.3416	0.3317	0.3173	0.3173	0.4849	0.2906	0.4501	0.3169	0.9052	0.2944	0.3486	1.5384	0.548	0.548	0.548	0.5014	0.4809	0.5105	0.0688	0.503	0.503	0.4347	0.5788	0.5685	0.4872	0.535	0.5144	1.2078	1.1949	1.1949	1.1949	0.4119	1.4501	0.5147	0.4119	0.4935	0.4935	0.6625	0.5509	0.5541	0.4409	1.2174
cs_d_deg5[l]	-0.1492	0.3533	0.3169	0.3169	0.3169	0.3317	0.3313	0.3416	0.3317	0.3173	0.3173	0.4849	0.2906	0.4501	0.3169	0.9052	0.2944	0.3486	1.5384	0.548	0.548	0.548	0.5014	0.4809	0.5105	0.0688	0.503	0.503	0.4347	0.5788	0.5685	0.4872	0.535	0.5144	1.2078	1.1949	1.1949	1.1949	0.4119	1.4501	0.5147	0.4119	0.4935	0.4935	0.6625	0.5509	0.5541	0.4409	1.2174
cs_e[l]	-0.1492	0.3533	0.3169	0.3169	0.3169	0.3317	0.3313	0.3416	0.3317	0.3173	0.3173	0.4849	0.2906	0.4501	0.3169	0.9052	0.2944	0.3486	1.5384	0.548	0.548	0.548	0.5014	0.4809	0.5105	0.0688	0.503	0.503	0.4347	0.5788	0.5685	0.4872	0.535	0.5144	1.2078	1.1949	1.1949	1.1949	0.4119	1.4501	0.5147	0.4119	0.4935	0.4935	0.6625	0.5509	0.5541	0.4409	1.2174
cs_e_deg1[l]	-0.1492	0.3533	0.3169	0.3169	0.3169	0.3317	0.3313	0.3416	0.3317	0.3173	0.3173	0.4849	0.2906	0.4501	0.3169	0.9052	0.2944	0.3486	1.5384	0.548	0.548	0.548	0.5014	0.4809	0.5105	0.0688	0.503	0.503	0.4347	0.5788	0.5685	0.4872	0.535	0.5144	1.2078	1.1949	1.1949	1.1949	0.4119	1.4501	0.5147	0.4119	0.4935	0.4935	0.6625	0.5509	0.5541	0.4409	1.2174
cs_e_deg2[l]	-0.1492	0.3533	0.3169	0.3169	0.3169	0.3317	0.3313	0.3416	0.3317	0.3173	0.3173	0.4849	0.2906	0.4501	0.3169	0.9052	0.2944	0.3486	1.5384	0.548	0.548	0.548	0.5014	0.4809	0.5105	0.0688	0.503	0.503	0.4347	0.5788	0.5685	0.4872	0.535	0.5144	1.2078	1.1949	1.1949	1.1949	0.4119	1.4501	0.5147	0.4119	0.4935	0.4935	0.6625	0.5509	0.5541	0.4409	1.2174
cs_e_deg4[l]	-0.1492	0.3533	0.3169	0.3169	0.3169	0.3317	0.3313	0.3416	0.3317	0.3173	0.3173	0.4849	0.2906	0.4501	0.3169	0.9052	0.2944	0.3486	1.5384	0.548	0.548	0.548	0.5014	0.4809	0.5105	0.0688	0.503	0.503	0.4347	0.5788	0.5685	0.4872	0.535	0.5144	1.2078	1.1949	1.1949	1.1949	0.4119	1.4501	0.5147	0.4119	0.4935	0.4935	0.6625	0.5509	0.5541	0.4409	1.2174
cs_e_deg5[l]	-0.1492	0.3533	0.3169	0.3169	0.3169	0.3317	0.3313	0.3416	0.3317	0.3173	0.3173	0.4849	0.2906	0.4501	0.3169	0.9052	0.2944	0.3486	1.5384	0.548	0.548	0.548	0.5014	0.4809	0.5105	0.0688	0.503	0.503	0.4347	0.5788	0.5685	0.4872	0.535	0.5144	1.2078	1.1949	1.1949	1.1949	0.4119	1.4501	0.5147	0.4119	0.4935	0.4935	0.6625	0.5509	0.5541	0.4409	1.2174
cs_e_deg6[l]	-0.1492	0.3533	0.3169	0.3169	0.3169	0.3317	0.3313	0.3416	0.3317	0.3173	0.3173	0.4849	0.2906	0.4501	0.3169	0.9052	0.2944	0.3486	1.5384	0.548	0.548	0.548	0.5014	0.4809	0.5105	0.0688	0.503	0.503	0.4347	0.5788	0.5685	0.4872	0.535	0.5144	1.2078	1.1949	1.1949	1.1949	0.4119	1.4501	0.5147	0.4119	0.4935	0.4935	0.6625	0.5509	0.5541	0.4409	1.2174
csn[c][e]	-0.1492	0.3533	0.3169	0.3169	0.3169	0.3317	0.3313	0.3416	0.3317	0.3173	0.3173	0.4849	0.2906	0.4501	0.3169	0.9052	0.2944	0.3486	1.5384	0.548	0.548	0.548	0.5014	0.4809	0.5105	0.0688	0.503	0.503	0.4347	0.5788	0.5685	0.4872	0.535	0.5144	1.2078	1.1949	1.1949	1.1949	0.4119	1.4501	0.5147	0.4119	0.4935	0.4935	0.6625	0.5509	0.5541	0.4409	1.2174
ctp[c][e][m][n]	-1.5391	-0.968	-0.9679	-0.9679	-0.9679	-0.9679	-0.9679	-0.9679	-0.9679	-0.9679	-0.9679	-0.9679	-0.9679	-0.9679	-0.9679	-0.9676	-0.9679	-0.9679	0.2519	-0.9032	-0.9032	-0.9032	-0.9033	-0.9279	-0.9033	-0.7927	-0.9033	-0.9033	-0.3972	-0.9032	-0.9032	0.0643	-0.9033	-0.9033	-0.7694	-0.7694	-0.7694	-0.7694	-0.7697	-0.7693	-0.7697	-0.7697	-0.7697	-0.7697	-0.7696	-0.7697	-0.7697	-0.7697	-0.7694
cyan[c][e][m]	-0.1492	0.3533	0.3169	0.3169	0.3169	0.3317	0.3313	0.3416	0.3317	0.3173	0.3173	0.4849	0.2906	0.4501	0.3169	0.9052	0.2944	0.3486	1.5384	0.548	0.548	0.548	0.5014	0.4809	0.5105	0.0688	0.503	0.503	0.4347	0.5788	0.5685	0.4872	0.535	0.5144	1.2078	1.1949	1.1949	1.1949	0.4119	1.4501	0.5147	0.4119	0.4935	0.4935	0.6625	0.5509	0.5541	0.4409	1.2174
cys_L[c][e]	0.3396	0.9613	0.9623	0.9623	0.9623	0.9623	0.9623	0.9623	0.9623	0.9623	0.9623	0.9623	0.9623	0.9623	0.9623	0.9624	0.9623	0.9623	1.1827	0.7669	0.7669	0.7669	0.7669	0.8009	0.7669	0.783	0.7669	0.7669	0.9704	0.7669	0.7669	1.1191	0.7669	0.7669	0.8187	0.8187	0.8187	0.8187	0.8185	0.8188	0.8185	0.8185	0.8185	0.8185	0.8185	0.8185	0.8185	0.8185	0.8187
cysasnmet[c][e]	-9.7678	-1.0102	-1.0205	-1.0205	-1.0205	-1.0205	-1.0205	-1.0205	-1.0205	-1.0205	-1.0205	-1.0205	-1.0205	-1.0205	-1.0205	-1.0205	-1.0205	-1.0205	-8.0806	-9.071	-9.071	-9.071	-9.1177	-9.1382	-9.1086	0.9359	-9.1161	-9.1161	-9.1844	-9.0403	-9.0506	-9.1319	-9.0841	-9.1047	-8.4111	-8.424	-8.424	-8.424	-9.2072	-8.1689	-9.1044	-9.2072	-9.1256	-9.1256	-8.9566	-9.0682	-9.065	-9.1782	-8.4017
cysaspphe[c][e]	-0.1492	0.3525	0.3162	0.3162	0.3162	0.331	0.331	0.3413	0.331	0.3165	0.3165	0.4842	0.2903	0.4494	0.3162	0.9047	0.294	0.3482	1.5384	0.548	0.548	0.548	0.501	0.4809	0.5102	0.0683	0.503	0.503	0.4347	0.5788	0.5685	0.4872	0.535	0.5144	1.2078	1.1949	1.1949	1.1949	0.4119	1.4499	0.5144	0.4119	0.4935	0.4935	0.6622	0.5509	0.5537	0.4409	1.2172
cyscys[c][e]	-0.1483	10.4157	10.4256	10.4256	10.4256	10.4256	10.4256	10.4256	10.4256	10.4256	10.4256	10.4256	10.4256	10.4256	10.4256	10.4256	10.4256	10.4256	1.5394	0.549	0.549	0.549	0.5023	0.4818	0.5114	11.2825	0.5039	0.5039	0.436	0.5797	0.5697	0.4881	0.5359	0.5153	1.2088	1.1959	1.1959	1.1959	0.4128	1.451	0.5153	0.4128	0.4944	0.4944	0.6635	0.5515	0.5544	0.4418	1.2183
cysglnmet[c][e]	-0.1492	0.3533	0.3169	0.3169	0.3169	0.3317	0.3313	0.3416	0.3317	0.3173	0.3173	0.4849	0.2906	0.4501	0.3169	0.9052	0.2944	0.3486	1.5384	0.548	0.548	0.548	0.5014	0.4809	0.5105	0.0688	0.503	0.503	0.4347	0.5788	0.5685	0.4872	0.535	0.5144	1.2078	1.1949	1.1949	1.1949	0.4119	1.4501	0.5147	0.4119	0.4935	0.4935	0.6625	0.5509	0.5541	0.4409	1.2174
cysgluhis[c][e]	-0.1492	0.3533	0.3169	0.3169	0.3169	0.3317	0.3313	0.3416	0.3317	0.3173	0.3173	0.4849	0.2906	0.4501	0.3169	0.9052	0.2944	0.3486	1.5384	0.548	0.548	0.548	0.5014	0.4809	0.5105	0.0688	0.503	0.503	0.4347	0.5788	0.5685	0.4872	0.535	0.5144	1.2078	1.1951	1.1951	1.1951	0.4119	1.4501	0.5147	0.4119	0.4935	0.4935	0.6625	0.5509	0.5541	0.4409	1.2174
cysglutrp[c][e]	-0.1492	0.3533	0.3169	0.3169	0.3169	0.3317	0.3313	0.3416	0.3317	0.3173	0.3173	0.4849	0.2906	0.4501	0.3169	0.9052	0.2944	0.3486	1.5384	0.548	0.548	0.548	0.5014	0.4809	0.5105	0.0688	0.503	0.503	0.4347	0.5788	0.5685	0.4872	0.535	0.5144	1.2078	1.1949	1.1949	1.1949	0.4119	1.4501	0.5147	0.4119	0.4935	0.4935	0.6625	0.5509	0.5541	0.4409	1.2174
cysleuthr[c][e]	-12.1936	-0.1344	-0.1349	-0.1349	-0.1349	-0.1349	-0.1349	-0.1349	-0.1349	-0.1349	-0.1349	-0.1349	-0.1349	-0.1349	-0.1349	-0.1349	-0.1349	-0.1349	-10.5064	-11.4968	-11.4968	-11.4968	-11.5435	-11.564	-11.5344	-0.2653	-11.5419	-11.5419	-11.6102	-11.4661	-11.4764	-11.5577	-11.5099	-11.5305	-10.8369	-10.8498	-10.8498	-10.8498	-11.6326	-10.5947	-11.5302	-11.6326	-11.5514	-11.5514	-11.3824	-11.494	-11.4908	-11.604	-10.8273
cyssermet[c][e]	-0.1492	0.3533	0.3169	0.3169	0.3169	0.3317	0.3313	0.3416	0.3317	0.3173	0.3173	0.4849	0.2906	0.4501	0.3169	0.9052	0.2944	0.3486	1.5385	0.548	0.548	0.548	0.5014	0.4809	0.5105	0.0688	0.503	0.503	0.4347	0.5788	0.5685	0.4872	0.535	0.5144	1.2078	1.1949	1.1949	1.1949	0.4119	1.4501	0.5147	0.4119	0.4935	0.4935	0.6625	0.5509	0.5541	0.4409	1.2174
cystyrasn[c][e]	-0.1492	0.3529	0.3165	0.3165	0.3165	0.3313	0.3313	0.3416	0.3313	0.3169	0.3169	0.4846	0.2906	0.4501	0.3165	0.905	0.2944	0.3486	1.5385	0.548	0.548	0.548	0.5014	0.4809	0.5105	0.0683	0.503	0.503	0.4347	0.5788	0.5685	0.4872	0.535	0.5144	1.2078	1.1949	1.1949	1.1949	0.4119	1.4501	0.5147	0.4119	0.4935	0.4935	0.6625	0.5509	0.5541	0.4409	1.2174
cytd[c][e][l][m]	-12.1462	-0.4171	-0.4172	-0.4172	-0.4172	-0.4172	-0.4172	-0.4172	-0.4172	-0.4172	-0.4172	-0.4171	-0.4172	-0.4171	-0.4172	-0.4169	-0.4172	-0.4172	0.3479	-0.2685	-0.2685	-0.2685	-0.2685	-0.0904	-0.2685	-0.8457	-0.2685	-0.2685	0.1233	-0.2685	-0.2685	0.2992	-0.2685	-0.2685	-0.447	-0.447	-0.447	-0.447	-0.4474	-0.4468	-0.4474	-0.4474	-0.4474	-0.4474	-0.4473	-0.4473	-0.4473	-0.4474	-0.447
dad_2[c][e]	-0.1488	0.3537	0.3174	0.3174	0.3174	0.3322	0.3318	0.3425	0.3322	0.3178	0.3178	0.4851	0.2911	0.4504	0.3174	0.9056	0.2949	0.3468	1.5384	0.5477	0.5477	0.5477	0.5009	0.4808	0.5101	0.0688	0.5029	0.5029	0.4348	0.5787	0.5683	0.4872	0.5348	0.5142	1.2072	1.1944	1.1944	1.1944	0.4113	1.4496	0.5141	0.4113	0.493	0.493	0.6636	0.5516	0.5546	0.4403	1.2171
dadp[c][m][n]	0.3631	0.0219	0.0219	0.0219	0.0219	0.0219	0.0219	0.0219	0.0219	0.0219	0.0219	0.0219	0.0219	0.0219	0.0219	0.0219	0.0219	0.0219	-1.8971	-2.4363	-2.4363	-2.4363	-2.4363	-2.579	-2.4363	0.5404	-2.4363	-2.4363	-2.4043	-2.4363	-2.4363	-2.0595	-2.4363	-2.4363	-2.1629	-2.1628	-2.1628	-2.1628	-2.1629	-2.1628	-2.1629	-2.1629	-2.1629	-2.1629	-2.1629	-2.1629	-2.1629	-2.1629	-2.1628
dag_hs[c][e][g][n][r]	0.9931	0.8075	0.8071	0.8071	0.8071	0.8071	0.8071	0.8071	0.8071	0.8071	0.8071	0.8071	0.8071	0.8071	0.8071	0.8071	0.8071	0.8071	0.7562	-0.4429	-0.4429	-0.4429	-0.4429	-0.3007	-0.4429	1.6248	-0.4429	-0.4429	0.3319	-0.4429	-0.4429	0.6353	-0.4429	-0.4429	-0.5979	-0.5978	-0.5978	-0.5978	-0.5978	-0.5978	-0.5978	-0.5978	-0.5978	-0.5978	-0.5978	-0.5978	-0.5978	-0.5978	-0.5978
damp[c]	0.1566	0.0009	0.0009	0.0009	0.0009	0.0009	0.0009	0.0009	0.0009	0.0009	0.0009	0.0009	0.0009	0.0009	0.0009	0.0009	0.0009	0.0009	-4.3644	-1.5385	-1.5385	-1.5385	-1.5385	-1.7416	-1.5385	0.4924	-1.5385	-1.5385	-3.1021	-1.5385	-1.5385	-4.2348	-1.5385	-1.5385	-1.2683	-1.2682	-1.2682	-1.2682	-1.2682	-1.2682	-1.2682	-1.2682	-1.2682	-1.2682	-1.2682	-1.2682	-1.2682	-1.2682	-1.2682
datp[c][m][n]	0.3846	0.0243	0.0243	0.0243	0.0243	0.0243	0.0243	0.0243	0.0243	0.0243	0.0243	0.0243	0.0243	0.0243	0.0243	0.0243	0.0243	0.0243	-1.7693	-2.5842	-2.5842	-2.5842	-2.5842	-2.7131	-2.5842	0.5457	-2.5842	-2.5842	-2.343	-2.5841	-2.5841	-1.9378	-2.5842	-2.5842	-2.31	-2.3099	-2.3099	-2.3099	-2.3101	-2.3098	-2.3101	-2.3101	-2.3101	-2.3101	-2.3101	-2.3101	-2.3101	-2.3101	-2.3099
dc2coa[m][x]	10.721	10.2294	10.2249	10.2249	10.2249	10.2249	10.2249	10.2249	10.2249	10.2249	10.2249	10.2249	10.2248	10.2249	10.2249	10.2251	10.2248	10.2249	1.5455	11.6898	11.6898	11.6898	11.6898	11.5716	11.6898	9.7084	11.6898	11.6898	0.4413	11.6898	11.6898	0.4934	11.6898	11.6898	11.6028	11.6027	11.6027	11.6027	11.6026	11.6028	11.6026	11.6026	11.6026	11.6026	11.6026	11.6026	11.6026	11.6026	11.6027
dca[c][e][r]	-0.1492	0.3531	0.3169	0.3169	0.3169	0.3313	0.3313	0.3416	0.3317	0.3173	0.3173	0.4847	0.2906	0.4501	0.3169	0.9052	0.2944	0.3486	1.5384	0.548	0.548	0.548	0.5012	0.4809	0.5102	0.0685	0.503	0.503	0.4347	0.5788	0.5685	0.4872	0.535	0.5144	1.2078	1.1949	1.1949	1.1949	0.4119	1.4501	0.5147	0.4119	0.4935	0.4935	0.6624	0.5509	0.5539	0.4409	1.2173
dca3s[c][e]	-0.1492	0.3533	0.3169	0.3169	0.3169	0.3313	0.3313	0.3416	0.3317	0.3173	0.3173	0.4849	0.2906	0.4501	0.3169	0.9052	0.2944	0.3486	1.5384	0.548	0.548	0.548	0.5014	0.4809	0.5102	0.0683	0.503	0.503	0.4347	0.5788	0.5685	0.4872	0.535	0.5144	1.2078	1.1949	1.1949	1.1949	0.4119	1.4501	0.5147	0.4119	0.4935	0.4935	0.6625	0.5509	0.5541	0.4409	1.2172
dcacoa[c][m][x]	10.2269	9.7426	9.738	9.738	9.738	9.738	9.738	9.7381	9.738	9.738	9.738	9.7382	9.738	9.7382	9.738	9.7387	9.738	9.7381	1.5397	11.2025	11.2025	11.2025	11.2025	11.0844	11.2025	9.2218	11.2025	11.2025	0.4355	11.2025	11.2025	0.4881	11.2025	11.2025	11.1157	11.1157	11.1157	11.1157	11.1153	11.1159	11.1153	11.1153	11.1153	11.1153	11.1154	11.1154	11.1154	11.1153	11.1157
dcamp[c]	31.639	0	0	0	0	0	0	0	0	0	0	0	0	0	0	0	0	0	0	0	0	0	0	0	0	0	0	0	0	0	0	0	0	0	0	0	0	0	0	0	0	0	0	0	0	0	0	0	0
dcdp[c][m][n]	0.2098	-0.0834	-0.0834	-0.0834	-0.0834	-0.0834	-0.0834	-0.0834	-0.0834	-0.0834	-0.0834	-0.0834	-0.0834	-0.0834	-0.0834	-0.0834	-0.0834	-0.0834	1.6317	-0.006	-0.006	-0.006	-0.006	0.145	-0.006	0.283	-0.006	-0.006	1.028	-0.006	-0.006	1.4562	-0.006	-0.006	-0.3537	-0.3537	-0.3537	-0.3537	-0.3537	-0.3537	-0.3537	-0.3537	-0.3537	-0.3537	-0.3537	-0.3537	-0.3537	-0.3537	-0.3537
dchac[c][e]	-0.1491	0.3535	0.3172	0.3172	0.3172	0.3317	0.3316	0.342	0.332	0.3176	0.3176	0.4851	0.2909	0.4502	0.3172	0.9055	0.2947	0.3489	1.5385	0.5481	0.5481	0.5481	0.5014	0.481	0.5103	0.0685	0.5031	0.5031	0.4347	0.5789	0.5687	0.4873	0.535	0.5144	1.2082	1.1954	1.1954	1.1954	0.4123	1.4505	0.5152	0.4123	0.4939	0.4939	0.6629	0.5513	0.5544	0.4412	1.2177
dcholcoa[c][r][x]	10.3294	11.2477	11.177	11.177	11.177	11.177	11.177	11.177	11.177	11.177	11.177	11.177	11.177	11.177	11.177	11.1771	11.177	11.177	3.3532	0.5476	0.5476	0.5476	0.5009	0.4804	0.51	12.2911	0.5027	0.5027	0.4341	0.5786	0.5683	0.4867	0.5346	0.5141	1.2078	1.1953	1.1953	1.1953	0.412	1.4503	0.5149	0.412	0.4936	0.4936	0.6623	0.5514	0.5546	0.4409	1.2176
dcmp[c][e][m][n]	0.6535	-0.1641	-0.1641	-0.1641	-0.1641	-0.1641	-0.1641	-0.1641	-0.1641	-0.1641	-0.1641	-0.1641	-0.1641	-0.1641	-0.1641	-0.164	-0.1641	-0.1641	3.706	1.0268	1.0268	1.0268	1.0268	1.2758	1.0268	0.0842	1.0268	1.0268	2.6871	1.0268	1.0268	3.4394	1.0268	1.0268	0.729	0.729	0.729	0.729	0.7289	0.729	0.7289	0.7289	0.7289	0.7289	0.7289	0.7289	0.7289	0.7289	0.729
dcsptn1[c][e][r]	-0.1492	0.3533	0.3169	0.3169	0.3169	0.3317	0.3313	0.3416	0.3317	0.3173	0.3173	0.4849	0.2906	0.4501	0.3169	0.9052	0.2944	0.3486	1.5384	0.548	0.548	0.548	0.5014	0.4809	0.5105	0.0683	0.503	0.503	0.4347	0.5788	0.5685	0.4872	0.535	0.5144	1.2078	1.1949	1.1949	1.1949	0.4119	1.4501	0.5147	0.4119	0.4935	0.4935	0.6625	0.5509	0.5541	0.4409	1.2174
dcsptn1coa[c][m][r][x]	-0.1492	0.3533	0.3169	0.3169	0.3169	0.3313	0.3313	0.3416	0.3317	0.3173	0.3173	0.4849	0.2906	0.4501	0.3169	0.9052	0.2944	0.3486	1.5384	0.548	0.548	0.548	0.5014	0.4809	0.5102	0.0683	0.503	0.503	0.4347	0.5788	0.5685	0.4872	0.535	0.5144	1.2078	1.1949	1.1949	1.1949	0.4119	1.4501	0.5147	0.4119	0.4935	0.4935	0.6625	0.5509	0.5541	0.4409	1.2174
dcsptn1crn[c][m]	2.5136	0.3545	0.3177	0.3177	0.3177	0.3326	0.3326	0.3428	0.3326	0.3181	0.3181	0.4839	0.2918	0.4507	0.3177	0.9044	0.2956	0.3496	1.7384	1.271	1.271	1.271	1.2462	1.2791	1.2511	0.068	1.2472	1.2472	1.5611	1.2876	1.2821	1.7767	1.2641	1.2531	1.554	1.6632	1.6632	1.6632	1.1359	1.8687	1.192	1.1359	1.1804	1.1804	1.277	1.2123	1.2141	1.1514	1.6807
dctp[c][m][n]	0.1749	-0.1979	-0.1979	-0.1979	-0.1979	-0.1979	-0.1979	-0.1979	-0.1979	-0.1979	-0.1979	-0.1979	-0.1979	-0.1979	-0.1979	-0.1979	-0.1979	-0.1979	1.1113	-0.4745	-0.4745	-0.4745	-0.4745	-0.4664	-0.4745	-0.4364	-0.4745	-0.4745	0.3297	-0.4745	-0.4745	0.8871	-0.4745	-0.4745	-0.4257	-0.4256	-0.4256	-0.4256	-0.4256	-0.4256	-0.4256	-0.4256	-0.4256	-0.4256	-0.4256	-0.4256	-0.4256	-0.4256	-0.4256
dcyt[c][e][m][n]	0.9417	-0.4166	-0.4167	-0.4167	-0.4167	-0.4167	-0.4167	-0.4167	-0.4167	-0.4167	-0.4167	-0.4167	-0.4167	-0.4167	-0.4167	-0.4166	-0.4167	-0.4167	4.3971	1.4011	1.4011	1.4011	1.4011	1.6505	1.4011	-1.8309	1.4011	1.4011	3.2478	1.4011	1.4011	4.1048	1.4011	1.4011	1.2758	1.2757	1.2757	1.2757	1.2757	1.2758	1.2757	1.2757	1.2757	1.2757	1.2757	1.2757	1.2757	1.2757	1.2757
dd2coa[c][m][x]	10.4255	9.9384	9.9339	9.9339	9.9339	9.9339	9.9339	9.9339	9.9339	9.9339	9.9339	9.934	9.9339	9.934	9.9339	9.9344	9.9339	9.9339	1.5393	11.3986	11.3986	11.3986	11.3986	11.2804	11.3986	9.4176	11.3986	11.3986	0.4346	11.3986	11.3986	0.4873	11.3986	11.3986	11.3117	11.3116	11.3116	11.3116	11.3114	11.3118	11.3114	11.3114	11.3114	11.3114	11.3114	11.3114	11.3114	11.3114	11.3117
dd3coa[m][x]	-0.1488	0.3537	0.3174	0.3174	0.3174	0.3322	0.3318	0.3421	0.3322	0.3178	0.3178	0.4854	0.2911	0.4505	0.3174	0.9057	0.2949	0.349	1.5388	0.5485	0.5485	0.5485	0.5015	0.4811	0.5106	0.0688	0.5035	0.5035	0.4352	0.5792	0.569	0.4877	0.5351	0.5149	1.2085	1.1956	1.1956	1.1956	0.4124	1.4507	0.5152	0.4124	0.4939	0.4939	0.663	0.5514	0.5545	0.4413	1.2179
ddca[c][e][r]	-0.1507	0.3528	0.3165	0.3165	0.3165	0.3313	0.3313	0.3415	0.3313	0.3168	0.3168	0.4841	0.2906	0.4492	0.3165	0.9043	0.2943	0.3477	1.538	0.5479	0.5479	0.5479	0.5012	0.4801	0.5104	0.0674	0.5029	0.5029	0.4342	0.5786	0.5683	0.4867	0.5349	0.5142	1.2082	1.1953	1.1953	1.1953	0.4121	1.4504	0.5149	0.4121	0.494	0.494	0.6629	0.5511	0.5542	0.4411	1.2178
ddcacoa[c][m][r][x]	10.4309	9.9372	9.9326	9.9326	9.9326	9.9326	9.9326	9.9326	9.9326	9.9326	9.9326	9.9328	9.9326	9.9328	9.9326	9.9333	9.9326	9.9327	1.5378	11.3971	11.3971	11.3971	11.397	11.2789	11.397	9.4164	11.397	11.397	0.4331	11.3971	11.3971	0.4859	11.397	11.397	11.3103	11.3102	11.3102	11.3102	11.3098	11.3104	11.3099	11.3098	11.3099	11.3099	11.3099	11.3099	11.3099	11.3098	11.3102
ddeccrn[c][e]	-0.1492	0.3529	0.3169	0.3169	0.3169	0.3313	0.3313	0.3416	0.3317	0.3173	0.3173	0.4849	0.2906	0.4501	0.3169	0.9052	0.2944	0.3486	1.5384	0.548	0.548	0.548	0.501	0.4809	0.5102	0.0683	0.503	0.503	0.4347	0.5788	0.5685	0.4872	0.535	0.5144	1.2078	1.1949	1.1949	1.1949	0.4119	1.4499	0.5147	0.4119	0.4935	0.4935	0.6622	0.5509	0.5537	0.4409	1.2172
ddece1crn[c][e]	-0.1492	0.3533	0.3169	0.3169	0.3169	0.3313	0.3313	0.3416	0.3317	0.3173	0.3173	0.4849	0.2906	0.4501	0.3169	0.9052	0.2944	0.3486	1.5384	0.548	0.548	0.548	0.5014	0.4809	0.5105	0.0688	0.503	0.503	0.4347	0.5788	0.5685	0.4872	0.535	0.5144	1.2078	1.1949	1.1949	1.1949	0.4119	1.4501	0.5147	0.4119	0.4935	0.4935	0.6625	0.5509	0.5541	0.4409	1.2174
ddsmsterol[c][r]	-0.1492	0.3533	0.3169	0.3169	0.3169	0.3317	0.3313	0.3416	0.3317	0.3173	0.3173	0.4849	0.2906	0.4501	0.3169	0.9052	0.2944	0.3486	1.5384	0.548	0.548	0.548	0.5014	0.4809	0.5105	0.0683	0.503	0.503	0.4347	0.5788	0.5685	0.4872	0.535	0.5144	1.2078	1.1949	1.1949	1.1949	0.4119	1.4501	0.5147	0.4119	0.4935	0.4935	0.6625	0.5509	0.5541	0.4409	1.2174
dec24dicoa[m][x]	1.0424	1.2527	1.2865	1.2865	1.2865	1.2865	1.2865	1.2865	1.2865	1.2865	1.2865	1.2865	1.2865	1.2865	1.2865	1.2865	1.2865	1.2865	2.5765	-0.2127	-0.2127	-0.2127	-0.2127	0.3096	-0.2127	2.0498	-0.2127	-0.2127	1.8935	-0.2127	-0.2127	2.4322	-0.2127	-0.2127	-0.8747	-0.8044	-0.8044	-0.8044	-0.8044	-0.8044	-0.8044	-0.8044	-0.8044	-0.8044	-0.8044	-0.8044	-0.8044	-0.8044	-0.8044
decdicoa[c]	-0.1492	0.3533	0.3169	0.3169	0.3169	0.3313	0.3313	0.3416	0.3317	0.3173	0.3173	0.4849	0.2906	0.4501	0.3169	0.9052	0.2944	0.3486	1.5384	0.548	0.548	0.548	0.5014	0.4809	0.5105	0.0688	0.503	0.503	0.4347	0.5788	0.5685	0.4872	0.535	0.5144	1.2078	1.1949	1.1949	1.1949	0.4119	1.4501	0.5147	0.4119	0.4935	0.4935	0.6625	0.5509	0.5541	0.4409	1.2174
decdicrn[c][e]	-0.1492	0.3533	0.3169	0.3169	0.3169	0.3313	0.3313	0.3416	0.3317	0.3173	0.3173	0.4849	0.2906	0.4501	0.3169	0.9052	0.2944	0.3486	1.5384	0.548	0.548	0.548	0.5014	0.4809	0.5105	0.0688	0.503	0.503	0.4347	0.5788	0.5685	0.4872	0.535	0.5144	1.2078	1.1949	1.1949	1.1949	0.4119	1.4501	0.5147	0.4119	0.4935	0.4935	0.6625	0.5509	0.5541	0.4409	1.2174
decdp[c][m]	-0.1492	0.3533	0.3169	0.3169	0.3169	0.3313	0.3313	0.3416	0.3317	0.3173	0.3173	0.4849	0.2906	0.4501	0.3169	0.9052	0.2944	0.3486	1.5384	0.548	0.548	0.548	0.5014	0.4809	0.5102	0.0683	0.503	0.503	0.4347	0.5788	0.5685	0.4872	0.535	0.5144	1.2078	1.1949	1.1949	1.1949	0.4119	1.4501	0.5147	0.4119	0.4935	0.4935	0.6625	0.5509	0.5541	0.4409	1.2174
dece3coa[m][x]	5.1804	0.359	0.3227	0.3227	0.3227	0.3375	0.3375	0.3478	0.3378	0.3234	0.3234	0.4901	0.2968	0.4552	0.323	0.9105	0.3005	0.354	1.5452	0.5539	0.5539	0.5539	0.5069	0.4851	0.516	0.073	0.5088	0.5088	0.4405	0.5843	0.5744	0.4934	0.5409	0.5202	1.2151	1.2024	1.2024	1.2024	0.4195	1.4576	0.5222	0.4195	0.501	0.501	0.669	0.558	0.5612	0.4484	1.2247
dece4coa[m][x]	1.0417	1.2524	1.2862	1.2862	1.2862	1.2862	1.2862	1.2862	1.2862	1.2862	1.2862	1.2862	1.2862	1.2862	1.2862	1.2863	1.2862	1.2862	2.5761	-0.2123	-0.2123	-0.2123	-0.2123	0.3096	-0.2123	2.0493	-0.2123	-0.2123	1.8931	-0.2123	-0.2123	2.4317	-0.2123	-0.2123	-0.8726	-0.8025	-0.8025	-0.8025	-0.8036	-0.802	-0.8035	-0.8036	-0.8035	-0.8035	-0.8033	-0.8034	-0.8034	-0.8035	-0.8024
deoxfvs[c][e][x]	-0.1492	0.3533	0.3169	0.3169	0.3169	0.3313	0.3313	0.3416	0.3317	0.3173	0.3173	0.4849	0.2906	0.4501	0.3169	0.9052	0.2944	0.3486	1.5384	0.5477	0.5477	0.5477	0.501	0.4809	0.5102	0.0683	0.503	0.503	0.4347	0.5788	0.5685	0.4872	0.5347	0.5141	1.2078	1.1949	1.1949	1.1949	0.4119	1.4501	0.5147	0.4119	0.4935	0.4935	0.6625	0.5509	0.5537	0.4409	1.2172
dgchol[c][x]	-0.7308	11.9855	11.9148	11.9148	11.9148	11.9148	11.9148	11.9148	11.9148	11.9148	11.9148	11.9148	11.9148	11.9148	11.9148	11.9148	11.9148	11.9148	3.9169	0.5474	0.5474	0.5474	0.5009	0.4799	0.5101	12.9374	0.5026	0.5026	0.4339	0.5787	0.5684	0.4863	0.5345	0.514	1.2083	1.196	1.196	1.196	0.4125	1.4508	0.5153	0.4125	0.494	0.494	0.6629	0.5521	0.5554	0.4413	1.2183
dgcholcoa[x]	0	37.4594	37.3886	37.3886	37.3886	37.3886	37.3886	37.3886	37.3886	37.3886	37.3886	37.3886	37.3886	37.3886	37.3886	37.3886	37.3886	37.3886	0	0	0	0	0	0	0	38.4113	0	0	0	0	0	0	0	0	0	0	0	0	0	0	0	0	0	0	0	0	0	0	0
dgdp[c][m][n]	-1.0197	-0.7853	-0.7852	-0.7852	-0.7852	-0.7852	-0.7852	-0.7852	-0.7852	-0.7852	-0.7852	-0.7852	-0.7853	-0.7852	-0.7852	-0.785	-0.7853	-0.7852	3.8746	2.1339	2.1339	2.1339	2.1339	2.3871	2.1339	-0.6428	2.1339	2.1339	3.359	2.1339	2.1339	3.7256	2.1339	2.1339	0.9302	0.9301	0.9301	0.9301	0.93	0.9302	0.93	0.93	0.93	0.93	0.93	0.93	0.93	0.93	0.9301
dgmp[c][e][m]	6.5269	0.353	0.3168	0.3168	0.3168	0.3315	0.3313	0.3416	0.3316	0.317	0.317	0.4845	0.2907	0.4498	0.3169	0.905	0.2944	0.3483	1.5379	0.5475	0.5475	0.5475	0.5008	0.4803	0.5099	0.068	0.5025	0.5025	0.4342	0.5783	0.568	0.4867	0.5345	0.5139	1.2076	1.1948	1.1948	1.1948	0.4118	1.4499	0.5145	0.4118	0.4933	0.4933	0.6624	0.5509	0.554	0.4407	1.2172
dgsn[c][e][m]	6.187	0.3534	0.3172	0.3172	0.3172	0.3319	0.3316	0.342	0.3319	0.3175	0.3175	0.4846	0.2909	0.45	0.3172	0.9052	0.2947	0.3482	1.5381	0.5478	0.5478	0.5478	0.5011	0.4808	0.5102	0.0683	0.5029	0.5029	0.4345	0.5785	0.5682	0.4868	0.5347	0.5142	1.2078	1.195	1.195	1.195	0.412	1.4501	0.5146	0.412	0.4936	0.4936	0.6628	0.5514	0.5545	0.441	1.2175
dgtp[c][e][m][n]	-1.028	-0.7851	-0.7851	-0.7851	-0.7851	-0.7851	-0.7851	-0.7851	-0.7851	-0.7851	-0.7851	-0.785	-0.7851	-0.785	-0.7851	-0.7847	-0.7851	-0.7851	3.8745	2.1338	2.1338	2.1338	2.1338	2.387	2.1338	-0.6427	2.1338	2.1338	3.3589	2.1338	2.1338	3.7255	2.1338	2.1338	0.9302	0.9301	0.9301	0.9301	0.93	0.9302	0.93	0.93	0.93	0.93	0.93	0.93	0.93	0.93	0.9301
dhap[c][e][m]	0.6709	0.5693	0.5696	0.5696	0.5696	0.5696	0.5696	0.5696	0.5696	0.5696	0.5696	0.5697	0.5696	0.5697	0.5696	0.5697	0.5696	0.5696	2.3423	0.2781	0.2781	0.2781	0.2781	0.6324	0.2781	1.2294	0.2781	0.2781	1.7826	0.2781	0.2781	2.1886	0.2781	0.2781	-1.0454	-1.0419	-1.0419	-1.0419	-1.0421	-1.0418	-1.0421	-1.0421	-1.0421	-1.0421	-1.0421	-1.0421	-1.0421	-1.0421	-1.0419
dhbpt[c][e]	-0.1492	0.3533	0.3169	0.3169	0.3169	0.3317	0.3313	0.3416	0.3317	0.3173	0.3173	0.4849	0.2906	0.4501	0.3169	0.9052	0.2944	0.3486	1.5384	0.548	0.548	0.548	0.5014	0.4809	0.5105	0.0688	0.503	0.503	0.4347	0.5788	0.5685	0.4872	0.535	0.5144	1.2078	1.1949	1.1949	1.1949	0.4119	1.4501	0.5147	0.4119	0.4935	0.4935	0.6625	0.5509	0.5541	0.4409	1.2174
dhcholestanate[c][e][r][x]	1.0138	0.5212	0.519	0.519	0.519	0.519	0.519	0.519	0.519	0.519	0.519	0.519	0.519	0.519	0.519	0.519	0.519	0.519	0.5278	0.424	0.424	0.424	0.424	0.4322	0.424	1.171	0.424	0.424	0.5541	0.424	0.424	0.5012	0.424	0.424	0.1989	0.1983	0.1983	0.1983	0.1983	0.1983	0.1983	0.1983	0.1983	0.1983	0.1983	0.1983	0.1983	0.1983	0.1983
dhcholestancoa[c][r][x]	11.6487	11.5677	11.497	11.497	11.497	11.497	11.497	11.497	11.497	11.497	11.497	11.497	11.497	11.497	11.497	11.4973	11.497	11.497	1.5384	0.548	0.548	0.548	0.5014	0.4809	0.5102	12.6968	0.503	0.503	0.4347	0.5788	0.5685	0.4872	0.535	0.5144	1.2078	1.1949	1.1949	1.1949	0.4119	1.4501	0.5147	0.4119	0.4935	0.4935	0.6625	0.5509	0.5541	0.4409	1.2172
dhcholoylcoa[x]	0	37.4594	37.3886	37.3886	37.3886	37.3886	37.3886	37.3886	37.3886	37.3886	37.3886	37.3886	37.3886	37.3886	37.3886	37.3886	37.3886	37.3886	0	0	0	0	0	0	0	38.4113	0	0	0	0	0	0	0	0	0	0	0	0	0	0	0	0	0	0	0	0	0	0	0
dhcrm_hs[c][g][r]	4.8569	0.3533	0.3173	0.3169	0.3173	0.3317	0.3317	0.342	0.3317	0.3173	0.3173	0.4849	0.291	0.4501	0.3173	0.9055	0.2948	0.3489	1.5382	0.5477	0.5477	0.5477	0.501	0.4806	0.5102	0.0683	0.503	0.503	0.4347	0.5788	0.5685	0.4869	0.5347	0.5141	1.2084	1.1955	1.1955	1.1955	0.4123	1.4506	0.515	0.4123	0.4938	0.4938	0.6628	0.5512	0.5544	0.4412	1.2178
dhdascb[c][e]	0.2111	0.6381	0.6377	0.6377	0.6377	0.6377	0.6377	0.6377	0.6377	0.6377	0.6377	0.6377	0.6377	0.6377	0.6377	0.6377	0.6377	0.6377	1.0988	0.379	0.379	0.379	0.379	0.9171	0.379	0.3411	0.379	0.379	1.0988	0.379	0.379	1.0988	0.379	0.379	0.2349	0.233	0.233	0.233	0.233	0.233	0.233	0.233	0.233	0.233	0.233	0.233	0.233	0.233	0.233
dhea[c][r]	-0.1492	0.3533	0.3169	0.3169	0.3169	0.3317	0.3313	0.3416	0.3317	0.3173	0.3173	0.4849	0.2906	0.4501	0.3169	0.9052	0.2944	0.3486	1.5385	0.548	0.548	0.548	0.5014	0.4809	0.5105	0.0688	0.503	0.503	0.4347	0.5788	0.5685	0.4872	0.535	0.5144	1.2078	1.1951	1.1951	1.1951	0.4119	1.4501	0.5147	0.4119	0.4935	0.4935	0.6625	0.5509	0.5541	0.4409	1.2174
dheas[c][e][r]	-0.1492	0.3533	0.3169	0.3169	0.3169	0.3315	0.3313	0.3416	0.3317	0.3173	0.3173	0.4849	0.2906	0.4501	0.3169	0.9052	0.2944	0.3486	1.5384	0.548	0.548	0.548	0.5014	0.4809	0.5103	0.0685	0.503	0.503	0.4347	0.5788	0.5685	0.4872	0.535	0.5144	1.2078	1.1949	1.1949	1.1949	0.4119	1.4501	0.5147	0.4119	0.4935	0.4935	0.6625	0.5509	0.5541	0.4409	1.2173
dhf[c][l][m]	0.185	0.0866	0.086	0.086	0.086	0.086	0.086	0.086	0.086	0.086	0.086	0.086	0.086	0.086	0.086	0.0861	0.086	0.086	2.1998	1.0965	1.0965	1.0965	1.0965	1.1784	1.0965	-0.2275	1.0965	1.0965	1.7352	1.0965	1.0965	2.0566	1.0965	1.0965	1.0022	1.0022	1.0022	1.0022	1.0022	1.0022	1.0022	1.0022	1.0022	1.0022	1.0022	1.0022	1.0022	1.0022	1.0022
dhlam[c][m]	0.0282	0.054	0.054	0.054	0.054	0.054	0.054	0.054	0.054	0.054	0.054	0.0541	0.054	0.0541	0.054	0.0543	0.054	0.054	0.0549	0.0541	0.0541	0.0541	0.0541	0.0541	0.0541	0.0539	0.0541	0.0541	0.0541	0.0541	0.0541	0.0541	0.0541	0.0541	0.0546	0.0546	0.0546	0.0546	0.0541	0.0548	0.0541	0.0541	0.0541	0.0541	0.0542	0.0541	0.0541	0.0541	0.0546
dhor_S[c]	7.3545	0.3533	0.3169	0.3169	0.3169	0.3313	0.3313	0.3416	0.3317	0.3173	0.3173	0.4849	0.2906	0.4501	0.3169	0.9052	0.2944	0.3486	1.5384	0.548	0.548	0.548	0.5014	0.4809	0.5105	0.0688	0.503	0.503	0.4347	0.5788	0.5685	0.4872	0.535	0.5144	1.2078	1.1949	1.1949	1.1949	0.4119	1.4501	0.5147	0.4119	0.4935	0.4935	0.6625	0.5509	0.5541	0.4409	1.2174
didp[c][n]	0.3992	-0.2425	-0.2425	-0.2425	-0.2425	-0.2425	-0.2425	-0.2425	-0.2425	-0.2425	-0.2425	-0.2425	-0.2425	-0.2425	-0.2425	-0.2425	-0.2425	-0.2425	-1.0994	-2.49	-2.49	-2.49	-2.49	-2.6314	-2.49	-0.2526	-2.49	-2.49	-3.6981	-2.49	-2.49	-1.5191	-2.49	-2.49	-2.5783	-2.5782	-2.5782	-2.5782	-2.5782	-2.5782	-2.5782	-2.5782	-2.5782	-2.5782	-2.5782	-2.5782	-2.5782	-2.5782	-2.5782
digalsgalside_hs[c][e][g]	-0.1492	0.3533	0.3169	0.3169	0.3169	0.3313	0.3313	0.3416	0.3317	0.3173	0.3173	0.4849	0.2906	0.4501	0.3169	0.9052	0.2944	0.3486	1.5384	0.548	0.548	0.548	0.5014	0.4809	0.5102	0.0683	0.503	0.503	0.4347	0.5788	0.5685	0.4872	0.535	0.5144	1.2078	1.1949	1.1949	1.1949	0.4119	1.4501	0.5147	0.4119	0.4935	0.4935	0.6625	0.5509	0.5541	0.4409	1.2172
digalside_hs[c][g][l]	-0.1492	0.3533	0.3169	0.3169	0.3169	0.3313	0.3313	0.3416	0.3317	0.3173	0.3173	0.4849	0.2906	0.4501	0.3169	0.9052	0.2944	0.3486	1.5384	0.548	0.548	0.548	0.5014	0.4809	0.5103	0.0688	0.503	0.503	0.4347	0.5788	0.5685	0.4872	0.535	0.5144	1.2078	1.1949	1.1949	1.1949	0.4119	1.4501	0.5147	0.4119	0.4935	0.4935	0.6625	0.5509	0.5541	0.4409	1.2172
din[c][e]	-0.1492	0.3533	0.3169	0.3169	0.3169	0.3317	0.3313	0.342	0.3317	0.3173	0.3173	0.4849	0.2906	0.4501	0.3169	0.9052	0.2944	0.3486	1.5384	0.5477	0.5477	0.5477	0.501	0.4809	0.5102	0.0688	0.5027	0.5027	0.4347	0.5785	0.5682	0.4872	0.5347	0.5141	1.2078	1.1949	1.1949	1.1949	0.4119	1.4501	0.5147	0.4119	0.4935	0.4935	0.6625	0.5509	0.5541	0.4409	1.2174
ditp[c][e][n]	0.3991	-0.2424	-0.2424	-0.2424	-0.2424	-0.2424	-0.2424	-0.2424	-0.2424	-0.2424	-0.2424	-0.2424	-0.2424	-0.2424	-0.2424	-0.2423	-0.2424	-0.2424	-1.0988	-2.4891	-2.4891	-2.4891	-2.4892	-2.6305	-2.4892	-0.2526	-2.4892	-2.4892	-3.6962	-2.4891	-2.4891	-1.5187	-2.4891	-2.4892	-2.5768	-2.5768	-2.5768	-2.5768	-2.5774	-2.5765	-2.5774	-2.5774	-2.5774	-2.5774	-2.5772	-2.5773	-2.5773	-2.5774	-2.5767
dlnlcg[c][e][l][r]	-25.8923	0.3533	0.3169	0.3169	0.3169	0.3313	0.3313	0.3416	0.3317	0.3173	0.3173	0.4849	0.2906	0.4501	0.3169	0.9052	0.2944	0.3486	1.5384	0.5477	0.5477	0.5477	0.501	0.4809	0.5102	0.0683	0.503	0.503	0.4347	0.5788	0.5685	0.4872	0.5347	0.5141	1.2078	1.1949	1.1949	1.1949	0.4119	1.4501	0.5147	0.4119	0.4935	0.4935	0.6622	0.5509	0.5537	0.4409	1.2172
dlnlcgcoa[c][m][r]	-7.312	-3.5529	-3.0578	-3.0578	-3.0578	-3.0574	-3.0574	-3.0572	-3.0574	-3.0578	-3.0578	-3.0535	-3.0584	-3.0544	-3.0578	-3.0402	-3.0583	-3.057	-5.1457	-4.7555	-4.7555	-4.7555	-4.762	-4.6879	-4.7607	-2.3926	-4.7617	-4.7617	-4.2182	-4.7513	-4.7527	-3.9429	-4.7573	-4.7602	-5.0548	-4.6989	-4.6989	-4.6989	-4.8901	-4.5877	-4.8766	-4.8901	-4.8793	-4.8793	-4.8605	-4.8722	-4.8718	-4.8862	-4.69
dlnlcgcrn[c][m][r]	-5.2398	-3.5069	-3.0268	-3.0268	-3.0268	-3.0261	-3.0261	-3.0256	-3.0261	-3.0268	-3.0268	-3.0185	-3.028	-3.0202	-3.0268	-2.993	-3.0278	-3.0253	-4.76	-4.4827	-4.4827	-4.4827	-4.4907	-4.4199	-4.4891	-2.3775	-4.4904	-4.4904	-3.9626	-4.4774	-4.4791	-3.6897	-4.4849	-4.4884	-4.7076	-4.3873	-4.3873	-4.3873	-4.6172	-4.263	-4.5998	-4.6172	-4.6034	-4.6034	-4.5768	-4.5939	-4.5934	-4.6123	-4.3773
dmgly[c][e]	-0.1492	0.3533	0.3169	0.3169	0.3169	0.3315	0.3313	0.3416	0.3317	0.3173	0.3173	0.4849	0.2906	0.4501	0.3169	0.9052	0.2944	0.3486	1.5384	0.548	0.548	0.548	0.5014	0.4809	0.5103	0.0688	0.503	0.503	0.4347	0.5788	0.5685	0.4872	0.535	0.5144	1.2078	1.1949	1.1949	1.1949	0.4119	1.4501	0.5147	0.4119	0.4935	0.4935	0.6625	0.5509	0.5541	0.4409	1.2173
dmhptcoa[m]	-0.1492	0.3533	0.3169	0.3169	0.3169	0.3313	0.3313	0.3416	0.3317	0.3173	0.3173	0.4849	0.2906	0.4501	0.3169	0.9052	0.2944	0.3486	1.5384	0.548	0.548	0.548	0.501	0.4809	0.5102	0.0683	0.503	0.503	0.4347	0.5788	0.5685	0.4872	0.535	0.5144	1.2078	1.1949	1.1949	1.1949	0.4119	1.4501	0.5147	0.4119	0.4935	0.4935	0.6625	0.5509	0.5541	0.4409	1.2172
dmhptcrn[c][e][m]	-7.0041	-4.0823	-4.3447	-4.3447	-4.3447	-4.3441	-4.3441	-4.3437	-4.3441	-4.3447	-4.3447	-4.3373	-4.3457	-4.3389	-4.3447	-4.3145	-4.3456	-4.3434	-6.2783	-7.5052	-7.5052	-7.5052	-7.5449	-7.5481	-7.5372	-3.2297	-7.5434	-7.5434	-7.4743	-7.4792	-7.4879	-7.3443	-7.5163	-7.5337	-6.8133	-6.8871	-6.8871	-6.8871	-7.641	-6.6147	-7.5543	-7.641	-7.5721	-7.5721	-7.4307	-7.5239	-7.5212	-7.6166	-6.8635
dmnoncoa[c][m][x]	1.174	1.1027	1.6068	1.6068	1.6068	1.6068	1.6068	1.6068	1.6068	1.6068	1.6068	1.6069	1.6068	1.6069	1.6068	1.6074	1.6068	1.6068	-4.2274	-0.2419	-0.2419	-0.2419	-0.2421	-0.1534	-0.242	2.2916	-0.242	-0.242	0.38	-0.2418	-0.2418	0.6719	-0.2419	-0.242	-1.1247	-0.3721	-0.3721	-0.3721	-0.3763	-0.3701	-0.3759	-0.3763	-0.376	-0.376	-0.3752	-0.3757	-0.3757	-0.3762	-0.3719
dmnoncrn[c][m][x]	-1.0404	-1.0859	-0.5914	-0.5914	-0.5914	-0.5914	-0.5914	-0.5914	-0.5914	-0.5914	-0.5914	-0.5913	-0.5915	-0.5913	-0.5914	-0.5909	-0.5914	-0.5914	-5.9226	-2.4558	-2.4558	-2.4558	-2.456	-2.3674	-2.456	0.0987	-2.456	-2.456	-1.834	-2.4557	-2.4557	-1.542	-2.4559	-2.4559	-3.3357	-2.5854	-2.5854	-2.5854	-2.5902	-2.5829	-2.5898	-2.5902	-2.5899	-2.5899	-2.5892	-2.5897	-2.5897	-2.5901	-2.5852
dmpp[c][x]	4.4105	0.3534	0.3169	0.3169	0.3169	0.3317	0.3316	0.3418	0.3318	0.3173	0.3173	0.4848	0.2909	0.4501	0.3169	0.9054	0.2945	0.3487	1.5381	0.5476	0.5476	0.5476	0.501	0.4811	0.51	0.0689	0.5027	0.5027	0.4346	0.5785	0.5682	0.4869	0.5346	0.514	1.2078	1.1949	1.1949	1.1949	0.4119	1.45	0.5147	0.4119	0.4934	0.4934	0.6623	0.5509	0.554	0.4409	1.2174
dnad[c][n]	-0.1492	0.3533	0.3169	0.3169	0.3169	0.3313	0.3313	0.3416	0.3317	0.3173	0.3173	0.4849	0.2906	0.4501	0.3169	0.9052	0.2944	0.3486	1.5384	0.548	0.548	0.548	0.5014	0.4809	0.5105	0.0688	0.503	0.503	0.4347	0.5788	0.5685	0.4872	0.535	0.5144	1.2078	1.1949	1.1949	1.1949	0.4119	1.4501	0.5147	0.4119	0.4935	0.4935	0.6625	0.5509	0.5541	0.4409	1.2174
doco13ac[c][e][r]	-0.1491	0.3533	0.3169	0.3169	0.3169	0.3317	0.3315	0.3418	0.3317	0.3173	0.3173	0.4849	0.2908	0.4501	0.3169	0.9053	0.2946	0.3487	1.5384	0.548	0.548	0.548	0.5011	0.4809	0.5102	0.0685	0.5029	0.5029	0.4347	0.5787	0.5685	0.4871	0.5349	0.5143	1.208	1.1952	1.1952	1.1952	0.4119	1.4501	0.5148	0.4119	0.4935	0.4935	0.6626	0.5509	0.5541	0.4409	1.2174
docosac[c][e][r]	-9.4966	-0.1113	-0.1169	-0.1169	-0.1169	-0.1169	-0.1169	-0.1169	-0.1169	-0.1169	-0.1169	-0.1167	-0.117	-0.1168	-0.1169	-0.1162	-0.117	-0.1169	0.2374	0.5159	0.5159	0.5159	0.5158	0.4328	0.5158	0.2784	0.5158	0.5158	0.2596	0.5159	0.5159	0.2272	0.5159	0.5158	0.5833	0.5835	0.5835	0.5835	0.5828	0.5838	0.5829	0.5828	0.5829	0.5829	0.583	0.5829	0.5829	0.5828	0.5835
docoscoa[c][m][r][x]	-9.911	-0.1115	-0.1171	-0.1171	-0.1171	-0.1171	-0.1171	-0.1171	-0.1171	-0.1171	-0.1171	-0.117	-0.1171	-0.1171	-0.1171	-0.1167	-0.1171	-0.1171	0.2365	0.5159	0.5159	0.5159	0.5158	0.4328	0.5158	0.2785	0.5158	0.5158	0.2596	0.5159	0.5159	0.227	0.5159	0.5158	0.583	0.5832	0.5832	0.5832	0.5829	0.5834	0.5829	0.5829	0.5829	0.5829	0.5829	0.5829	0.5829	0.5829	0.5832
dodecanac[c][e][x]	-0.1492	0.3533	0.3169	0.3169	0.3169	0.3317	0.3313	0.3416	0.3317	0.3173	0.3173	0.4849	0.2906	0.4501	0.3169	0.9052	0.2944	0.3486	1.5384	0.548	0.548	0.548	0.5014	0.4809	0.5103	0.0688	0.503	0.503	0.4347	0.5788	0.5685	0.4872	0.535	0.5144	1.2078	1.1949	1.1949	1.1949	0.4119	1.4501	0.5147	0.4119	0.4935	0.4935	0.6625	0.5509	0.5541	0.4409	1.2174
dolichol_L[c][e][r]	-0.1492	0.3533	0.3169	0.3169	0.3169	0.3313	0.3313	0.3416	0.3317	0.3173	0.3173	0.4849	0.2906	0.4501	0.3169	0.9052	0.2944	0.3486	1.5384	0.548	0.548	0.548	0.5014	0.4809	0.5105	0.0688	0.503	0.503	0.4347	0.5788	0.5685	0.4872	0.535	0.5144	1.2078	1.1949	1.1949	1.1949	0.4119	1.4501	0.5147	0.4119	0.4935	0.4935	0.6625	0.5509	0.5541	0.4409	1.2174
dolichol_U[c][r]	-0.1492	0.3533	0.3169	0.3169	0.3169	0.3317	0.3313	0.3416	0.3317	0.3173	0.3173	0.4849	0.2906	0.4501	0.3169	0.9052	0.2944	0.3486	1.5384	0.548	0.548	0.548	0.5014	0.4809	0.5105	0.0688	0.503	0.503	0.4347	0.5788	0.5685	0.4872	0.535	0.5144	1.2078	1.1949	1.1949	1.1949	0.4119	1.4501	0.5147	0.4119	0.4935	0.4935	0.6625	0.5509	0.5541	0.4409	1.2174
dopa[c][e]	-0.1492	0.3533	0.3169	0.3169	0.3169	0.3317	0.3313	0.3416	0.3317	0.3173	0.3173	0.4849	0.2906	0.4501	0.3169	0.9052	0.2944	0.3486	1.5384	0.548	0.548	0.548	0.5014	0.4809	0.5104	0.0686	0.503	0.503	0.4347	0.5788	0.5685	0.4872	0.535	0.5144	1.2078	1.1949	1.1949	1.1949	0.4119	1.4501	0.5147	0.4119	0.4935	0.4935	0.6625	0.5509	0.5541	0.4409	1.2174
dopaqn[c]	-0.1492	0.3533	0.3169	0.3169	0.3169	0.3317	0.3315	0.3417	0.3317	0.3173	0.3173	0.4849	0.2908	0.4501	0.3169	0.9052	0.2946	0.3487	1.5384	0.548	0.548	0.548	0.5014	0.4809	0.5103	0.0686	0.503	0.503	0.4347	0.5788	0.5685	0.4872	0.535	0.5144	1.2079	1.1951	1.1951	1.1951	0.4119	1.4501	0.5147	0.4119	0.4935	0.4935	0.6625	0.5509	0.5541	0.4409	1.2174
dpcoa[c][l][m]	-0.1492	0.3533	0.3169	0.3169	0.3169	0.3317	0.3313	0.342	0.3317	0.3173	0.3173	0.4849	0.2906	0.4501	0.3169	0.9052	0.2944	0.3489	1.5384	0.548	0.548	0.548	0.5014	0.4809	0.5105	0.0688	0.503	0.503	0.4347	0.5788	0.5685	0.4872	0.535	0.5144	1.208	1.1951	1.1951	1.1951	0.4119	1.4502	0.5147	0.4119	0.4935	0.4935	0.6625	0.5509	0.5541	0.4409	1.2174
dsmsterol[c][e][r]	-0.1492	0.3533	0.3169	0.3169	0.3169	0.3317	0.3313	0.3416	0.3317	0.3173	0.3173	0.4849	0.2906	0.4501	0.3169	0.9052	0.2944	0.3486	1.5384	0.548	0.548	0.548	0.5014	0.4809	0.5105	0.0683	0.503	0.503	0.4347	0.5788	0.5685	0.4872	0.535	0.5144	1.2078	1.1949	1.1949	1.1949	0.4119	1.4501	0.5147	0.4119	0.4935	0.4935	0.6625	0.5509	0.5541	0.4409	1.2174
dtdp[c][e][m][n]	0.3148	0.0722	0.0722	0.0722	0.0722	0.0722	0.0722	0.0722	0.0722	0.0722	0.0722	0.0722	0.0722	0.0722	0.0722	0.0722	0.0722	0.0722	-1.0504	-2.8372	-2.8372	-2.8372	-2.8372	-3.322	-2.8372	0.6582	-2.8372	-2.8372	-1.4699	-2.8372	-2.8372	-1.0606	-2.8372	-2.8372	-2.2865	-2.2863	-2.2863	-2.2863	-2.2866	-2.2862	-2.2866	-2.2866	-2.2866	-2.2866	-2.2865	-2.2866	-2.2866	-2.2866	-2.2863
dtmp[c][e][l][m]	-8.2241	-11.5693	-11.6056	-11.6056	-11.6056	-11.5909	-11.5912	-11.5808	-11.5908	-11.6053	-11.6053	-11.4377	-11.6319	-11.4725	-11.6056	-11.0173	-11.6281	-11.5739	-10.3841	-11.3745	-11.3745	-11.3745	-11.4212	-11.4416	-11.4121	-11.854	-11.4196	-11.4196	-11.4878	-11.3438	-11.354	-11.4353	-11.3876	-11.4082	-10.7147	-10.7275	-10.7275	-10.7275	-11.5106	-10.4724	-11.4078	-11.5106	-11.4291	-11.4291	-11.2601	-11.3716	-11.3685	-11.4817	-10.7052
dttp[c][e][m][n]	0.3143	0.0722	0.0722	0.0722	0.0722	0.0722	0.0722	0.0722	0.0722	0.0722	0.0722	0.0722	0.0722	0.0722	0.0722	0.0722	0.0722	0.0722	-1.0506	-2.8375	-2.8375	-2.8375	-2.8375	-3.3224	-2.8375	0.6582	-2.8375	-2.8375	-1.4699	-2.8374	-2.8374	-1.0606	-2.8375	-2.8375	-2.2867	-2.2866	-2.2866	-2.2866	-2.2867	-2.2866	-2.2867	-2.2867	-2.2867	-2.2867	-2.2867	-2.2867	-2.2867	-2.2867	-2.2866
dudp[c][m][n]	-1.5508	-0.9134	-0.9133	-0.9133	-0.9133	-0.9133	-0.9133	-0.9133	-0.9133	-0.9133	-0.9133	-0.9133	-0.9133	-0.9133	-0.9133	-0.9133	-0.9133	-0.9133	1.6981	0.6678	0.6678	0.6678	0.6678	0.728	0.6678	-1.2872	0.6678	0.6678	1.2158	0.6678	0.6678	1.5587	0.6678	0.6678	0.4181	0.4181	0.4181	0.4181	0.418	0.4181	0.418	0.418	0.418	0.418	0.4181	0.418	0.418	0.418	0.4181
dump[c][m][n]	-6.7016	-11.7101	-11.7466	-11.7466	-11.7466	-11.7322	-11.7323	-11.7217	-11.7321	-11.7467	-11.7467	-11.591	-11.7731	-11.6169	-11.747	-11.1676	-11.7695	-11.7173	3.6054	1.8674	1.8674	1.8674	1.8674	2.121	1.8674	-11.9964	1.8674	1.8674	3.0923	1.8674	1.8674	3.4572	1.8674	1.8674	0.6446	0.6445	0.6445	0.6445	0.6444	0.6446	0.6444	0.6444	0.6444	0.6444	0.6444	0.6444	0.6444	0.6444	0.6445
duri[c][e][m]	-7.8294	-12.1983	-12.2349	-12.2349	-12.2349	-12.2205	-12.2207	-12.21	-12.2205	-12.2352	-12.2352	-12.0841	-12.2616	-12.1057	-12.2355	-11.6599	-12.2579	-12.2082	3.6054	1.8674	1.8674	1.8674	1.8674	2.1211	1.8674	-12.4799	1.8674	1.8674	3.0924	1.8674	1.8674	3.4573	1.8674	1.8674	0.6446	0.6445	0.6445	0.6445	0.6444	0.6445	0.6444	0.6444	0.6444	0.6444	0.6444	0.6444	0.6444	0.6444	0.6445
dutp[c][m][n]	-1.7862	-0.9252	-0.925	-0.925	-0.925	-0.925	-0.925	-0.925	-0.925	-0.925	-0.925	-0.925	-0.925	-0.925	-0.925	-0.925	-0.925	-0.925	0.6088	-0.2542	-0.2542	-0.2542	-0.2542	-0.2689	-0.2542	-1.3513	-0.2542	-0.2542	0.0112	-0.2542	-0.2542	0.4571	-0.2542	-0.2542	0.002	0.0021	0.0021	0.0021	0.002	0.0021	0.002	0.002	0.002	0.002	0.002	0.002	0.002	0.002	0.0021
dxtrn[c][e]	-1.7342	0.353	0.3169	0.3169	0.3169	0.3313	0.3313	0.3416	0.3317	0.317	0.317	0.4849	0.2906	0.4501	0.3169	0.9052	0.2944	0.3486	1.5384	0.548	0.548	0.548	0.5011	0.4809	0.5102	0.0685	0.503	0.503	0.4347	0.5788	0.5685	0.4872	0.535	0.5144	1.2078	1.1949	1.1949	1.1949	0.4119	1.4499	0.5145	0.4119	0.4935	0.4935	0.6623	0.5507	0.5538	0.4409	1.2172
e4hglu[m]	-41.1567	-15.918	-15.9542	-15.9542	-15.9542	-15.9393	-15.9393	-15.9287	-15.939	-15.9538	-15.9538	-15.7865	-15.9806	-15.8218	-15.9542	-15.3656	-15.9768	-15.9228	-1.2721	-1.3866	-1.3866	-1.3866	-1.3866	-1.4805	-1.3866	-16.2027	-1.3866	-1.3866	-1.4141	-1.3866	-1.3866	-1.2825	-1.3866	-1.3866	-1.5511	-1.5511	-1.5511	-1.5511	-1.5511	-1.5511	-1.5511	-1.5511	-1.5511	-1.5511	-1.5511	-1.5511	-1.5511	-1.5511	-1.5511
e4p[c]	-0.02	0.0002	0.0001	0.0001	0.0001	0.0002	0.0002	0.0002	0.0002	0.0001	0.0001	0.0002	0.0001	0.0002	0.0001	0.0002	0.0001	0.0002	4.8402	2.7782	2.7782	2.7782	2.7782	3.1281	2.7782	0.0001	2.7782	2.7782	4.2654	2.7782	2.7782	4.6829	2.7782	2.7782	1.3747	1.3746	1.3746	1.3746	1.3746	1.3746	1.3746	1.3746	1.3746	1.3746	1.3746	1.3746	1.3746	1.3746	1.3746
eicostet[c][e][r]	-0.1492	0.3533	0.3169	0.3169	0.3169	0.3313	0.3313	0.3416	0.3317	0.3173	0.3173	0.4849	0.2906	0.4501	0.3169	0.9052	0.2944	0.3486	1.5384	0.548	0.548	0.548	0.5014	0.4809	0.5102	0.0683	0.503	0.503	0.4347	0.5788	0.5685	0.4872	0.535	0.5144	1.2078	1.1949	1.1949	1.1949	0.4119	1.4501	0.5147	0.4119	0.4935	0.4935	0.6625	0.5509	0.5541	0.4409	1.2174
eicostetcoa[c][m][r]	-0.1492	0.3533	0.3169	0.3169	0.3169	0.3313	0.3313	0.3416	0.3317	0.3173	0.3173	0.4849	0.2906	0.4501	0.3169	0.9052	0.2944	0.3486	1.5384	0.548	0.548	0.548	0.501	0.4809	0.5102	0.0683	0.503	0.503	0.4347	0.5788	0.5685	0.4872	0.535	0.5144	1.2078	1.1949	1.1949	1.1949	0.4119	1.4501	0.5147	0.4119	0.4935	0.4935	0.6625	0.5509	0.5541	0.4409	1.2172
eicostetcrn[c][m]	2.5136	0.3545	0.3177	0.3177	0.3177	0.3326	0.3326	0.3428	0.3326	0.3181	0.3181	0.4839	0.2918	0.4508	0.3177	0.9044	0.2956	0.3498	1.7386	1.271	1.271	1.271	1.2462	1.2792	1.251	0.068	1.2472	1.2472	1.5611	1.2876	1.2821	1.7767	1.264	1.2532	1.554	1.6632	1.6632	1.6632	1.1359	1.8686	1.192	1.1359	1.1801	1.1801	1.277	1.2123	1.2141	1.1514	1.6806
eidi1114ac[c][e]	-0.1492	0.3533	0.3169	0.3169	0.3169	0.3313	0.3313	0.3416	0.3317	0.3173	0.3173	0.4849	0.2906	0.4501	0.3169	0.9052	0.2944	0.3486	1.5384	0.548	0.548	0.548	0.5014	0.4809	0.5105	0.0688	0.503	0.503	0.4347	0.5788	0.5685	0.4872	0.535	0.5144	1.2078	1.1949	1.1949	1.1949	0.4119	1.4501	0.5147	0.4119	0.4935	0.4935	0.6625	0.5509	0.5541	0.4409	1.2174
elaid[c][e][r]	-0.1492	0.3529	0.3165	0.3165	0.3165	0.3313	0.3313	0.3416	0.3313	0.3169	0.3169	0.4846	0.2906	0.4501	0.3169	0.905	0.2944	0.3486	1.5382	0.5477	0.5477	0.5477	0.501	0.4806	0.5102	0.0683	0.5027	0.5027	0.4347	0.5785	0.5682	0.4869	0.5347	0.5141	1.2076	1.1947	1.1947	1.1947	0.4116	1.4499	0.5144	0.4116	0.4931	0.4931	0.6622	0.5506	0.5537	0.4405	1.2172
elaidcrn[c][e][m]	1.3656	0.4389	0.4413	0.4413	0.4413	0.4413	0.4413	0.4413	0.4413	0.4413	0.4413	0.4414	0.4413	0.4414	0.4413	0.4416	0.4413	0.4413	2.0065	0.6266	0.6266	0.6266	0.6266	0.8048	0.6266	0.6155	0.6266	0.6266	1.5314	0.6266	0.6266	1.8759	0.6266	0.6266	0.498	0.4983	0.4983	0.4983	0.4978	0.4985	0.4979	0.4978	0.4979	0.4979	0.498	0.4979	0.4979	0.4979	0.4983
epoxtac[c][e][r]	-0.1492	0.3533	0.3169	0.3169	0.3169	0.3313	0.3313	0.3416	0.3317	0.3173	0.3173	0.4849	0.2906	0.4501	0.3169	0.9052	0.2944	0.3486	1.5384	0.548	0.548	0.548	0.5014	0.4809	0.5102	0.0688	0.503	0.503	0.4347	0.5788	0.5685	0.4872	0.535	0.5144	1.2078	1.1949	1.1949	1.1949	0.4119	1.4501	0.5147	0.4119	0.4935	0.4935	0.6625	0.5509	0.5541	0.4409	1.2172
estradiol[c][e][r]	0.9875	0.6022	0.5958	0.5958	0.5958	0.5958	0.5958	0.5958	0.5958	0.5958	0.5958	0.5959	0.5958	0.5959	0.5958	0.596	0.5958	0.5958	1.9745	0.0889	0.0889	0.0889	0.0888	0.3367	0.0888	0.7957	0.0888	0.0888	1.3654	0.0889	0.0889	1.8148	0.0888	0.0888	-0.5351	-0.5413	-0.5413	-0.5413	-0.5418	-0.5411	-0.5418	-0.5418	-0.5418	-0.5418	-0.5417	-0.5418	-0.5418	-0.5418	-0.5413
estriol[c][e][r]	-0.1492	0.3533	0.3169	0.3169	0.3169	0.3313	0.3313	0.3416	0.3317	0.3173	0.3173	0.4849	0.2906	0.4501	0.3169	0.9052	0.2944	0.3486	1.5384	0.548	0.548	0.548	0.5014	0.4809	0.5102	0.0683	0.503	0.503	0.4347	0.5788	0.5685	0.4872	0.535	0.5144	1.2078	1.1949	1.1949	1.1949	0.4119	1.4501	0.5147	0.4119	0.4935	0.4935	0.6625	0.5509	0.5541	0.4409	1.2174
estrone[c][r]	0.9877	0.6022	0.5959	0.5959	0.5959	0.5959	0.5959	0.5959	0.5959	0.5959	0.5959	0.5959	0.5959	0.5959	0.5959	0.5959	0.5959	0.5959	1.9746	0.0887	0.0887	0.0887	0.0887	0.3367	0.0887	0.7959	0.0887	0.0887	1.3656	0.0887	0.0887	1.815	0.0887	0.0887	-0.5359	-0.5422	-0.5422	-0.5422	-0.5422	-0.5422	-0.5422	-0.5422	-0.5422	-0.5422	-0.5422	-0.5422	-0.5422	-0.5422	-0.5422
estroneglc[c][e][r]	-0.1492	0.3533	0.3169	0.3169	0.3169	0.3313	0.3313	0.3416	0.3317	0.3173	0.3173	0.4849	0.2906	0.4501	0.3169	0.9052	0.2944	0.3486	1.5384	0.548	0.548	0.548	0.5014	0.4809	0.5102	0.0683	0.503	0.503	0.4347	0.5788	0.5685	0.4872	0.535	0.5144	1.2078	1.1949	1.1949	1.1949	0.4119	1.4501	0.5147	0.4119	0.4935	0.4935	0.6625	0.5509	0.5541	0.4409	1.2172
estrones[c][e][r]	-0.1492	0.3531	0.3169	0.3169	0.3169	0.3315	0.3313	0.3416	0.3317	0.3173	0.3173	0.4849	0.2906	0.4501	0.3169	0.9052	0.2944	0.3486	1.5384	0.548	0.548	0.548	0.5012	0.4809	0.5103	0.0685	0.503	0.503	0.4347	0.5788	0.5685	0.4872	0.535	0.5144	1.2078	1.1949	1.1949	1.1949	0.4119	1.45	0.5147	0.4119	0.4935	0.4935	0.6625	0.5509	0.5539	0.4409	1.2173
etfox[m]	0	0	0	0	0	0	0	0	0	0	0	0	0	0	0	0	0	0	0	0	0	0	0	0	0	0	0	0	0	0	0	0	0	0	0	0	0	0	0	0	0	0	0	0	0	0	0	0	0
etfrd[m]	0	0	0	0	0	0	0	0	0	0	0	0	0	0	0	0	0	0	0	0	0	0	0	0	0	0	0	0	0	0	0	0	0	0	0	0	0	0	0	0	0	0	0	0	0	0	0	0	0
etha[c][e]	1.0229	0.8494	0.8488	0.8488	0.8488	0.8488	0.8488	0.8488	0.8488	0.8488	0.8488	0.8488	0.8488	0.8488	0.8488	0.8488	0.8488	0.8488	0.6254	-0.5851	-0.5851	-0.5851	-0.5851	-0.4408	-0.5851	1.6419	-0.5851	-0.5851	0.1983	-0.5851	-0.5851	0.5038	-0.5851	-0.5851	-0.7415	-0.7413	-0.7413	-0.7413	-0.7413	-0.7413	-0.7413	-0.7413	-0.7413	-0.7413	-0.7413	-0.7413	-0.7413	-0.7413	-0.7413
ethamp[c][e][r]	0.9917	0.8454	0.845	0.845	0.845	0.845	0.845	0.845	0.845	0.845	0.845	0.845	0.845	0.845	0.845	0.845	0.845	0.845	1.3991	0.1886	0.1886	0.1886	0.1886	0.3328	0.1886	1.5736	0.1886	0.1886	0.972	0.1886	0.1886	1.2774	0.1886	0.1886	0.0322	0.0323	0.0323	0.0323	0.0323	0.0323	0.0323	0.0323	0.0323	0.0323	0.0323	0.0323	0.0323	0.0323	0.0323
etoh[c][e][x]	-0.1492	0.3533	0.3169	0.3169	0.3169	0.3315	0.3313	0.3416	0.3317	0.3173	0.3173	0.4849	0.2906	0.4501	0.3169	0.9052	0.2944	0.3486	1.5384	0.548	0.548	0.548	0.5014	0.4809	0.5105	0.0688	0.503	0.503	0.4347	0.5788	0.5685	0.4872	0.535	0.5144	1.2078	1.1949	1.1949	1.1949	0.4119	1.4501	0.5147	0.4119	0.4935	0.4935	0.6625	0.5509	0.5541	0.4409	1.2174
f1a[e][g][l]	-0.1492	0.3533	0.3169	0.3169	0.3169	0.3313	0.3313	0.3416	0.3317	0.3173	0.3173	0.4849	0.2906	0.4501	0.3169	0.9052	0.2944	0.3486	1.5384	0.548	0.548	0.548	0.5014	0.4809	0.5103	0.0683	0.503	0.503	0.4347	0.5788	0.5685	0.4872	0.535	0.5144	1.2078	1.1949	1.1949	1.1949	0.4119	1.4501	0.5147	0.4119	0.4935	0.4935	0.6625	0.5509	0.5541	0.4409	1.2173
f1p[c]	-0.147	0.355	0.319	0.319	0.319	0.3338	0.3334	0.3437	0.3338	0.3193	0.3193	0.4857	0.2927	0.4525	0.319	0.9065	0.2965	0.3481	1.5394	0.5515	0.5515	0.5515	0.5045	0.484	0.5136	0.0707	0.5061	0.5061	0.4375	0.5819	0.5719	0.4877	0.5381	0.5175	1.2114	1.1985	1.1985	1.1985	0.4154	1.4537	0.5181	0.4154	0.4969	0.4969	0.6659	0.5546	0.5578	0.4443	1.221
f6p[c]	-0.02	6.95485e-05	6.66922e-05	6.66778e-05	6.66922e-05	6.78318e-05	6.78318e-05	6.86397e-05	6.78318e-05	6.67066e-05	6.67066e-05	7.9358e-05	6.47158e-05	7.72374e-05	6.66922e-05	0.0001	6.50044e-05	6.88849e-05	3.3397	0.7991	0.7991	0.7991	0.7991	1.3204	0.7991	4.91503e-05	0.7991	0.7991	2.6923	0.7991	0.7991	3.1722	0.7991	0.7991	-1.0397	-1.0398	-1.0398	-1.0398	-1.0401	-1.0397	-1.0401	-1.0401	-1.0401	-1.0401	-1.04	-1.0401	-1.0401	-1.0401	-1.0398
fad[c][m][r][x]	-0.1747	-0.3248	-0.3201	-0.3201	-0.3201	-0.3201	-0.3201	-0.3201	-0.3201	-0.3201	-0.3201	-0.3201	-0.3201	-0.3201	-0.3201	-0.3201	-0.3201	-0.3201	-0.2099	-0.255	-0.255	-0.255	-0.255	-0.2788	-0.255	0.0589	-0.255	-0.255	-0.502	-0.255	-0.255	-0.2771	-0.255	-0.255	-0.3251	-0.3224	-0.3224	-0.3224	-0.3225	-0.3224	-0.3225	-0.3225	-0.3225	-0.3225	-0.3225	-0.3225	-0.3225	-0.3225	-0.3224
fadh2[c][m][r][x]	-0.1747	-0.3248	-0.3201	-0.3201	-0.3201	-0.3201	-0.3201	-0.3201	-0.3201	-0.3201	-0.3201	-0.3201	-0.3201	-0.3201	-0.3201	-0.3201	-0.3201	-0.3201	-0.2099	-0.255	-0.255	-0.255	-0.255	-0.2788	-0.255	0.0589	-0.255	-0.255	-0.502	-0.255	-0.255	-0.2771	-0.255	-0.255	-0.3251	-0.3224	-0.3224	-0.3224	-0.3225	-0.3224	-0.3225	-0.3225	-0.3225	-0.3225	-0.3225	-0.3225	-0.3225	-0.3225	-0.3224
fald[c][e]	11.0049	10.4571	10.4618	10.4618	10.4618	10.4618	10.4618	10.4618	10.4618	10.4618	10.4618	10.4619	10.4618	10.4619	10.4618	10.4623	10.4618	10.4618	1.5384	0.548	0.548	0.548	0.5013	0.4809	0.5104	11.9376	0.5029	0.5029	0.4347	0.5787	0.5685	0.4872	0.535	0.5143	1.2078	1.1949	1.1949	1.1949	0.4119	1.45	0.5147	0.4119	0.4934	0.4934	0.6624	0.5509	0.554	0.4408	1.2174
fdp[c][e]	0.0222	0.0494	0.0494	0.0494	0.0494	0.0494	0.0494	0.0494	0.0494	0.0494	0.0494	0.0494	0.0494	0.0494	0.0494	0.0495	0.0494	0.0494	-11.1207	-12.1102	-12.1102	-12.1102	-12.157	-12.1771	-12.1478	0.0493	-12.155	-12.155	-12.2235	-12.0796	-12.0895	-12.1715	-12.1232	-12.1438	-11.4506	-11.4635	-11.4635	-11.4635	-12.2465	-11.2084	-12.1437	-12.2465	-12.165	-12.165	-11.9958	-12.1076	-12.1047	-12.2176	-11.4412
fe2[c][e][m]	0.2111	0.6381	0.6377	0.6377	0.6377	0.6377	0.6377	0.6377	0.6377	0.6377	0.6377	0.6377	0.6377	0.6377	0.6377	0.6377	0.6377	0.6377	1.0988	0.379	0.379	0.379	0.379	0.9171	0.379	0.4825	0.379	0.379	1.0988	0.379	0.379	1.0988	0.379	0.379	0.2349	0.233	0.233	0.233	0.233	0.233	0.233	0.233	0.233	0.233	0.233	0.233	0.233	0.233	0.233
fe3[c][e]	0.2111	0.6381	0.6377	0.6377	0.6377	0.6377	0.6377	0.6377	0.6377	0.6377	0.6377	0.6377	0.6377	0.6377	0.6377	0.6377	0.6377	0.6377	1.0988	0.379	0.379	0.379	0.379	0.9171	0.379	0.4825	0.379	0.379	1.0988	0.379	0.379	1.0988	0.379	0.379	0.2349	0.233	0.233	0.233	0.233	0.233	0.233	0.233	0.233	0.233	0.233	0.233	0.233	0.233	0.233
fgam[c]	-0.1492	0.3529	0.3169	0.3169	0.3169	0.3313	0.3313	0.3416	0.3317	0.3173	0.3173	0.4849	0.2906	0.4501	0.3169	0.9052	0.2944	0.3486	1.5384	0.548	0.548	0.548	0.501	0.4809	0.5102	0.0683	0.503	0.503	0.4347	0.5788	0.5685	0.4872	0.535	0.5144	1.2078	1.1949	1.1949	1.1949	0.4119	1.4499	0.5147	0.4119	0.4935	0.4935	0.6625	0.5509	0.5541	0.4409	1.2172
ficytC[m]	-0.4729	-0.6316	-0.6311	-0.6311	-0.6311	-0.6311	-0.6311	-0.6311	-0.6311	-0.6311	-0.6311	-0.6311	-0.6311	-0.6311	-0.6311	-0.6311	-0.6311	-0.6311	3.2034e-16	-0.0571	-0.0571	-0.0571	-0.0571	-0.0556	-0.0571	-1.1873	-0.0571	-0.0571	0	-0.0571	-0.0571	0	-0.0571	-0.0571	-0.1041	-0.1041	-0.1041	-0.1041	-0.1041	-0.1041	-0.1041	-0.1041	-0.1041	-0.1041	-0.1041	-0.1041	-0.1041	-0.1041	-0.1041
focytC[m]	-0.4729	-0.6316	-0.6311	-0.6311	-0.6311	-0.6311	-0.6311	-0.6311	-0.6311	-0.6311	-0.6311	-0.6311	-0.6311	-0.6311	-0.6311	-0.6311	-0.6311	-0.6311	0	-0.0571	-0.0571	-0.0571	-0.0571	-0.0556	-0.0571	-1.1873	-0.0571	-0.0571	0	-0.0571	-0.0571	0	-0.0571	-0.0571	-0.1041	-0.1041	-0.1041	-0.1041	-0.1041	-0.1041	-0.1041	-0.1041	-0.1041	-0.1041	-0.1041	-0.1041	-0.1041	-0.1041	-0.1041
fol[c][e][m]	0.4633	0.559	0.5581	0.5581	0.5581	0.5581	0.5581	0.5581	0.5581	0.5581	0.5581	0.5581	0.5581	0.5581	0.5581	0.5581	0.5581	0.5581	2.1061	0.5066	0.5066	0.5066	0.5066	0.6936	0.5066	0.2802	0.5066	0.5066	1.642	0.5066	0.5066	1.9637	0.5066	0.5066	0.4436	0.4432	0.4432	0.4432	0.4432	0.4432	0.4432	0.4432	0.4432	0.4432	0.4432	0.4432	0.4432	0.4432	0.4432
for[c][e][m][r]	-0.271	-0.1785	-0.1791	-0.1791	-0.1791	-0.1791	-0.1791	-0.1791	-0.1791	-0.1791	-0.1791	-0.1791	-0.1791	-0.1791	-0.1791	-0.1791	-0.1791	-0.1791	1.1863	0.3442	0.3442	0.3442	0.3442	0.419	0.3442	-0.3907	0.3442	0.3442	0.8005	0.3442	0.3442	1.0775	0.3442	0.3442	0.259	0.2589	0.2589	0.2589	0.2589	0.259	0.2589	0.2589	0.2589	0.2589	0.2589	0.2589	0.2589	0.2589	0.2589
formcoa[c][x]	-0.1492	0.3533	0.3169	0.3169	0.3169	0.3313	0.3313	0.3416	0.3317	0.3173	0.3173	0.4849	0.2906	0.4501	0.3169	0.9052	0.2944	0.3486	1.5384	0.548	0.548	0.548	0.5014	0.4809	0.5105	0.0688	0.503	0.503	0.4347	0.5788	0.5685	0.4872	0.535	0.5144	1.2078	1.1949	1.1949	1.1949	0.4119	1.4501	0.5147	0.4119	0.4935	0.4935	0.6625	0.5509	0.5541	0.4409	1.2174
fprica[c]	-0.1492	0.3529	0.3169	0.3169	0.3169	0.3313	0.3313	0.3416	0.3317	0.3173	0.3173	0.4849	0.2906	0.4497	0.3169	0.9052	0.2944	0.3493	1.5382	0.5477	0.5477	0.5477	0.501	0.4809	0.5102	0.0683	0.503	0.503	0.4347	0.5785	0.5685	0.4869	0.5347	0.5141	1.208	1.1951	1.1951	1.1951	0.4119	1.4501	0.5147	0.4119	0.4935	0.4935	0.6622	0.5506	0.5537	0.4409	1.2172
frdp[c][r][x]	4.0079	0.3534	0.3171	0.317	0.3171	0.3318	-0.5742	0.3419	0.3318	0.3174	0.3174	0.4849	0.2908	0.4502	0.3171	0.9055	0.2946	0.3487	1.5384	0.5474	0.5474	0.5474	0.5008	-0.4247	0.5098	0.069	0.5024	0.5024	0.4345	0.5784	0.5681	0.487	0.5343	0.5138	1.2077	1.1947	1.1947	1.1947	0.4117	0.5444	0.5145	0.4117	0.4933	0.4933	0.6621	0.5507	0.5538	0.4406	1.2171
fru[c][e]	-0.008	0.0001	9.27611e-05	9.27611e-05	9.27611e-05	9.75666e-05	9.74859e-05	0.0001	9.7607e-05	9.28823e-05	9.28823e-05	0.0002	8.42808e-05	0.0001	9.27611e-05	0.0003	8.54923e-05	0.0001	-7.4155	-7.4482	-7.4482	-7.4482	-7.4492	-7.4496	-7.449	1.84558e-05	-7.4492	-7.4492	-7.4507	-7.4475	-7.4477	-7.4496	-7.4485	-7.4489	-7.4295	-7.43	-7.43	-7.43	-7.4511	-7.4202	-7.4489	-7.4511	-7.4494	-7.4494	-7.4456	-7.4481	-7.4481	-7.4505	-7.4292
fuc13galacglcgal14acglcgalgluside_hs[c][e][g]	-0.1492	0.3533	0.3169	0.3169	0.3169	0.3313	0.3313	0.3416	0.3317	0.3173	0.3173	0.4849	0.2906	0.4501	0.3169	0.9052	0.2944	0.3486	1.5384	0.548	0.548	0.548	0.5014	0.4809	0.5105	0.0688	0.503	0.503	0.4347	0.5788	0.5685	0.4872	0.535	0.5144	1.2078	1.1949	1.1949	1.1949	0.4119	1.4501	0.5147	0.4119	0.4935	0.4935	0.6625	0.5509	0.5541	0.4409	1.2174
fuc14galacglcgalgluside_hs[c][e][g]	-0.1492	0.3533	0.3169	0.3169	0.3169	0.3317	0.3313	0.3416	0.3317	0.3173	0.3173	0.4849	0.2906	0.4501	0.3169	0.9052	0.2944	0.3486	1.5384	0.548	0.548	0.548	0.5014	0.4809	0.5105	0.0688	0.503	0.503	0.4347	0.5788	0.5685	0.4872	0.535	0.5144	1.2078	1.1949	1.1949	1.1949	0.4119	1.4501	0.5147	0.4119	0.4935	0.4935	0.6625	0.5509	0.5541	0.4409	1.2174
fuc1p_L[c]	-0.1492	0.3533	0.3169	0.3169	0.3169	0.3317	0.3313	0.3416	0.3317	0.3173	0.3173	0.4849	0.2906	0.4501	0.3169	0.9052	0.2944	0.3486	1.5384	0.548	0.548	0.548	0.5014	0.4809	0.5105	0.0688	0.503	0.503	0.4347	0.5788	0.5685	0.4872	0.535	0.5144	1.2078	1.1949	1.1949	1.1949	0.4119	1.4501	0.5147	0.4119	0.4935	0.4935	0.6625	0.5509	0.5541	0.4409	1.2174
fucacgalfucgalacglcgalgluside_hs[c][e][g]	-0.1492	0.3533	0.3169	0.3169	0.3169	0.3315	0.3313	0.3416	0.3317	0.3173	0.3173	0.4849	0.2906	0.4501	0.3169	0.9052	0.2944	0.3486	1.5384	0.548	0.548	0.548	0.5014	0.4809	0.5105	0.0688	0.503	0.503	0.4347	0.5788	0.5685	0.4872	0.535	0.5144	1.2078	1.1949	1.1949	1.1949	0.4119	1.4501	0.5147	0.4119	0.4935	0.4935	0.6625	0.5509	0.5541	0.4409	1.2174
fucacngalacglcgalgluside_hs[c][e][g]	-0.1492	0.3533	0.3169	0.3169	0.3169	0.3317	0.3313	0.3416	0.3317	0.3173	0.3173	0.4849	0.2906	0.4501	0.3169	0.9052	0.2944	0.3486	1.5384	0.548	0.548	0.548	0.5014	0.4809	0.5105	0.0688	0.503	0.503	0.4347	0.5788	0.5685	0.4872	0.535	0.5144	1.2078	1.1949	1.1949	1.1949	0.4119	1.4501	0.5147	0.4119	0.4935	0.4935	0.6625	0.5509	0.5541	0.4409	1.2174
fucfucfucgalacglc13galacglcgal14acglcgalgluside_hs[c][e][g]	-0.1492	0.3533	0.3169	0.3169	0.3169	0.3313	0.3313	0.3416	0.3317	0.3173	0.3173	0.4849	0.2906	0.4501	0.3169	0.9052	0.2944	0.3486	1.5384	0.548	0.548	0.548	0.5014	0.4809	0.5105	0.0688	0.503	0.503	0.4347	0.5788	0.5685	0.4872	0.535	0.5144	1.2078	1.1949	1.1949	1.1949	0.4119	1.4501	0.5147	0.4119	0.4935	0.4935	0.6625	0.5509	0.5541	0.4409	1.2174
fucfucgalacglcgalgluside_hs[c][e][g]	-0.1492	0.3533	0.3169	0.3169	0.3169	0.3317	0.3313	0.3416	0.3317	0.3173	0.3173	0.4849	0.2906	0.4501	0.3169	0.9052	0.2944	0.3486	1.5384	0.548	0.548	0.548	0.5014	0.4809	0.5105	0.0688	0.503	0.503	0.4347	0.5788	0.5685	0.4872	0.535	0.5144	1.2078	1.1949	1.1949	1.1949	0.4119	1.4501	0.5147	0.4119	0.4935	0.4935	0.6625	0.5509	0.5541	0.4409	1.2174
fucgal14acglcgalgluside_hs[c][e][g]	-0.1492	0.3533	0.3169	0.3169	0.3169	0.3317	0.3313	0.3416	0.3317	0.3173	0.3173	0.4849	0.2906	0.4501	0.3169	0.9052	0.2944	0.3486	1.5384	0.548	0.548	0.548	0.5014	0.4809	0.5105	0.0688	0.503	0.503	0.4347	0.5788	0.5685	0.4872	0.535	0.5144	1.2078	1.1949	1.1949	1.1949	0.4119	1.4501	0.5147	0.4119	0.4935	0.4935	0.6625	0.5509	0.5541	0.4409	1.2174
fucgalfucgalacglcgalgluside_hs[c][e][g]	-0.1492	0.3533	0.3169	0.3169	0.3169	0.3315	0.3313	0.3416	0.3317	0.3173	0.3173	0.4849	0.2906	0.4501	0.3169	0.9052	0.2944	0.3486	1.5384	0.548	0.548	0.548	0.5014	0.4809	0.5105	0.0688	0.503	0.503	0.4347	0.5788	0.5685	0.4872	0.535	0.5144	1.2078	1.1949	1.1949	1.1949	0.4119	1.4501	0.5147	0.4119	0.4935	0.4935	0.6625	0.5509	0.5541	0.4409	1.2173
fum[c][e][m]	-0.2	-0.31	-0.3101	-0.3101	-0.3101	-0.3101	-0.3101	-0.3101	-0.3101	-0.3101	-0.3101	-0.3101	-0.3101	-0.3101	-0.3101	-0.3101	-0.3101	-0.3101	0.5424	0.443	0.443	0.443	0.443	0.4604	0.443	-0.7963	0.443	0.443	0.4843	0.443	0.443	0.5312	0.443	0.443	0.3849	0.3849	0.3849	0.3849	0.3849	0.3849	0.3849	0.3849	0.3849	0.3849	0.3849	0.3849	0.3849	0.3849	0.3849
fvs[c][e][x]	0.4189	0.1222	0.1229	0.1229	0.1229	0.1229	0.1229	0.1229	0.1229	0.1229	0.1229	0.1229	0.1229	0.1229	0.1229	0.1231	0.1229	0.1229	1.3991	0.497	0.497	0.497	0.497	0.5757	0.497	0.0041	0.497	0.497	0.9983	0.497	0.497	1.2806	0.497	0.497	0.4726	0.4727	0.4727	0.4727	0.4724	0.4728	0.4725	0.4724	0.4725	0.4725	0.4725	0.4725	0.4725	0.4724	0.4727
fvscoa[c][x]	-0.1492	0.3533	0.3169	0.3169	0.3169	0.3313	0.3313	0.3416	0.3317	0.3173	0.3173	0.4849	0.2906	0.4501	0.3169	0.9052	0.2944	0.3486	1.5384	0.548	0.548	0.548	0.5014	0.4809	0.5102	0.0683	0.503	0.503	0.4347	0.5788	0.5685	0.4872	0.535	0.5144	1.2078	1.1949	1.1949	1.1949	0.4119	1.4501	0.5147	0.4119	0.4935	0.4935	0.6625	0.5509	0.5541	0.4409	1.2174
g1p[c]	-0.1424	0.3423	0.3071	0.307	0.3071	0.3246	0.324	0.3338	0.3246	0.3121	0.3121	0.4689	0.2891	0.4427	0.3119	0.9074	0.2924	0.3413	1.5516	0.5586	0.5586	0.5586	0.512	0.4911	0.5213	0.0769	0.5137	0.5137	0.4422	0.5898	0.5793	0.4936	0.5456	0.5249	1.2004	1.1878	1.1878	1.1878	0.4058	1.4438	0.5081	0.4058	0.4874	0.4874	0.6631	0.5535	0.5583	0.435	1.2123
g3p[c]	0.6238	0.5004	0.5004	0.5004	0.5004	0.5004	0.5004	0.5004	0.5004	0.5004	0.5004	0.5004	0.5004	0.5004	0.5004	0.5004	0.5004	0.5004	1.8321	0.7518	0.7518	0.7518	0.7518	0.8815	0.7518	1.1071	0.7518	0.7518	1.4615	0.7518	0.7518	1.7235	0.7518	0.7518	-1.7988	-1.7989	-1.7989	-1.7989	-1.7989	-1.7988	-1.7989	-1.7989	-1.7989	-1.7989	-1.7989	-1.7989	-1.7989	-1.7989	-1.7989
g6p[c][r]	0.0381	-0.0229	-0.0226	-0.0226	-0.0226	-0.0226	-0.0226	-0.0226	-0.0226	-0.0226	-0.0226	-0.0226	-0.0226	-0.0226	-0.0226	-0.0224	-0.0226	-0.0226	3.8586	0.5257	0.5257	0.5257	0.5257	1.4076	0.5257	-0.059	0.5257	0.5257	3.1292	0.5257	0.5257	3.6802	0.5257	0.5257	-3.9352	-3.9319	-3.9319	-3.9319	-3.9389	-3.9286	-3.9382	-3.9389	-3.9384	-3.9384	-3.9371	-3.9379	-3.9379	-3.9387	-3.9316
gal[c][e][l]	1.197	0.8488	0.8524	0.8524	0.8524	0.8524	0.8524	0.8524	0.8524	0.8524	0.8524	0.8524	0.8524	0.8524	0.8524	0.8524	0.8524	0.8524	0.6508	-0.747	-0.747	-0.747	-0.747	-0.5807	-0.747	1.0032	-0.747	-0.747	0.2172	-0.7469	-0.7469	0.4967	-0.747	-0.747	-0.6816	-0.6805	-0.6805	-0.6805	-0.6806	-0.6804	-0.6806	-0.6806	-0.6806	-0.6806	-0.6806	-0.6806	-0.6806	-0.6806	-0.6805
gal1p[c]	-0.1469	0.3495	0.3138	0.3138	0.3138	0.3302	0.3298	0.3396	0.3302	0.3168	0.3168	0.4802	0.2925	0.4463	0.3166	0.9109	0.2959	0.3451	1.543	0.5524	0.5524	0.5524	0.5055	0.485	0.5146	0.0736	0.5073	0.5073	0.4381	0.5831	0.5728	0.49	0.5393	0.5185	1.2072	1.1947	1.1947	1.1947	0.412	1.4501	0.5146	0.412	0.4936	0.4936	0.6635	0.5539	0.5574	0.4412	1.2179
galacglcgalgbside_hs[c][e][g]	-0.1492	0.3533	0.3169	0.3169	0.3169	0.3313	0.3313	0.3416	0.3317	0.3173	0.3173	0.4849	0.2906	0.4501	0.3169	0.9052	0.2944	0.3486	1.5384	0.548	0.548	0.548	0.5014	0.4809	0.5105	0.0688	0.503	0.503	0.4347	0.5788	0.5685	0.4872	0.535	0.5144	1.2078	1.1949	1.1949	1.1949	0.4119	1.4501	0.5147	0.4119	0.4935	0.4935	0.6625	0.5509	0.5541	0.4409	1.2174
galfucgalacglcgalgluside_hs[c][g]	-0.1492	0.3533	0.3169	0.3169	0.3169	0.3313	0.3313	0.3416	0.3317	0.3173	0.3173	0.4849	0.2906	0.4501	0.3169	0.9052	0.2944	0.3486	1.5384	0.548	0.548	0.548	0.5014	0.4809	0.5105	0.0688	0.503	0.503	0.4347	0.5788	0.5685	0.4872	0.535	0.5144	1.2078	1.1949	1.1949	1.1949	0.4119	1.4501	0.5147	0.4119	0.4935	0.4935	0.6625	0.5509	0.5541	0.4409	1.2172
galgalfucfucgalacglcgalacglcgal14acglcgalgluside_hs[c][e][g]	-0.1492	0.3533	0.3169	0.3169	0.3169	0.3313	0.3313	0.3416	0.3317	0.3173	0.3173	0.4849	0.2906	0.4501	0.3169	0.9052	0.2944	0.3486	1.5384	0.548	0.548	0.548	0.5014	0.4809	0.5105	0.0688	0.503	0.503	0.4347	0.5788	0.5685	0.4872	0.535	0.5144	1.2078	1.1949	1.1949	1.1949	0.4119	1.4501	0.5147	0.4119	0.4935	0.4935	0.6625	0.5509	0.5541	0.4409	1.2174
galgalgalthcrm_hs[c][e][g]	-0.1492	0.3533	0.3169	0.3169	0.3169	0.3313	0.3313	0.3416	0.3317	0.3173	0.3173	0.4849	0.2906	0.4501	0.3169	0.9052	0.2944	0.3486	1.5384	0.548	0.548	0.548	0.5014	0.4809	0.5105	0.0683	0.503	0.503	0.4347	0.5788	0.5685	0.4872	0.535	0.5144	1.2078	1.1949	1.1949	1.1949	0.4119	1.4501	0.5147	0.4119	0.4935	0.4935	0.6625	0.5509	0.5541	0.4409	1.2174
galgluside_hs[c][e][g][l][r]	-0.1489	0.3534	0.3171	0.3171	0.3171	0.3316	0.3315	0.3418	0.3318	0.3173	0.3173	0.4851	0.2908	0.4503	0.317	0.9054	0.2946	0.3488	1.5385	0.5475	0.5475	0.5475	0.5008	0.4809	0.51	0.069	0.5025	0.5025	0.4347	0.5785	0.5681	0.4871	0.5344	0.5138	1.2076	1.1947	1.1947	1.1947	0.4116	1.4498	0.5144	0.4116	0.4932	0.4932	0.6623	0.5507	0.5537	0.4406	1.217
galside_hs[c][g][l][r]	-0.1492	0.3533	0.3169	0.3169	0.3169	0.3315	0.3313	0.3416	0.3317	0.3173	0.3173	0.4849	0.2906	0.4501	0.3169	0.9052	0.2944	0.3486	1.5384	0.548	0.548	0.548	0.5014	0.4809	0.5103	0.0688	0.503	0.503	0.4347	0.5788	0.5685	0.4872	0.535	0.5144	1.2078	1.1949	1.1949	1.1949	0.4119	1.45	0.5147	0.4119	0.4935	0.4935	0.6625	0.5509	0.554	0.4409	1.2173
galt[c][e]	-0.1491	0.3497	0.3137	0.3137	0.3137	0.3285	0.3281	0.3384	0.3285	0.3144	0.3144	0.4865	0.2881	0.4476	0.314	0.9051	0.2919	0.3501	1.537	0.5467	0.5467	0.5467	0.5	0.4795	0.5091	0.0682	0.5016	0.5016	0.4333	0.5774	0.5671	0.4862	0.5336	0.513	1.2066	1.1937	1.1937	1.1937	0.4109	1.4488	0.5133	0.4109	0.4924	0.4924	0.6611	0.5495	0.5527	0.4395	1.2162
gam[c][e]	-0.1492	0.3529	0.3169	0.3165	0.3169	0.3313	0.3313	0.3416	0.3313	0.3169	0.3169	0.4846	0.2906	0.4501	0.3169	0.905	0.2944	0.3486	1.5384	0.5477	0.5477	0.5477	0.501	0.4809	0.5102	0.0688	0.503	0.503	0.4347	0.5788	0.5685	0.4872	0.5347	0.5141	1.2078	1.1949	1.1949	1.1949	0.4119	1.4499	0.5144	0.4119	0.4935	0.4935	0.6622	0.5506	0.5537	0.4409	1.2172
gar[c]	-0.1492	0.3529	0.3169	0.3169	0.3169	0.3313	0.3313	0.3416	0.3317	0.3173	0.3173	0.4849	0.2906	0.4501	0.3169	0.9052	0.2944	0.3486	1.5384	0.548	0.548	0.548	0.501	0.4809	0.5102	0.0683	0.503	0.503	0.4347	0.5788	0.5685	0.4872	0.535	0.5144	1.2078	1.1949	1.1949	1.1949	0.4119	1.4499	0.5147	0.4119	0.4935	0.4935	0.6625	0.5509	0.5541	0.4409	1.2172
gbside_hs[c][e][g][l]	-0.1492	0.3533	0.3169	0.3169	0.3169	0.3315	0.3313	0.3416	0.3317	0.3173	0.3173	0.4849	0.2906	0.4501	0.3169	0.9052	0.2944	0.3486	1.5384	0.548	0.548	0.548	0.5012	0.4809	0.5103	0.0685	0.503	0.503	0.4347	0.5788	0.5685	0.4872	0.535	0.5144	1.2078	1.195	1.195	1.195	0.4119	1.4501	0.5147	0.4119	0.4935	0.4935	0.6625	0.5509	0.5541	0.4409	1.2174
gca3s[c][e]	-0.1492	0.3533	0.3169	0.3169	0.3169	0.3313	0.3313	0.3416	0.3317	0.3173	0.3173	0.4849	0.2906	0.4501	0.3169	0.9052	0.2944	0.3486	1.5384	0.548	0.548	0.548	0.5014	0.4809	0.5102	0.0683	0.503	0.503	0.4347	0.5788	0.5685	0.4872	0.535	0.5144	1.2078	1.1949	1.1949	1.1949	0.4119	1.4501	0.5147	0.4119	0.4935	0.4935	0.6625	0.5509	0.5541	0.4409	1.2172
gcald[c][m]	-0.1492	0.3529	0.3165	0.3165	0.3165	0.3313	0.3313	0.3416	0.3313	0.3169	0.3169	0.4846	0.2906	0.4497	0.3165	0.9045	0.2944	0.3482	1.5384	0.548	0.548	0.548	0.5014	0.4809	0.5105	0.0683	0.503	0.503	0.4347	0.5788	0.5685	0.4872	0.535	0.5144	1.2078	1.1949	1.1949	1.1949	0.4119	1.4501	0.5147	0.4119	0.4935	0.4935	0.6625	0.5509	0.5541	0.4409	1.2174
gcdca3s[c][e]	-0.1492	0.3533	0.3169	0.3169	0.3169	0.3313	0.3313	0.3416	0.3317	0.3173	0.3173	0.4849	0.2906	0.4501	0.3169	0.9052	0.2944	0.3486	1.5384	0.548	0.548	0.548	0.5014	0.4809	0.5102	0.0683	0.503	0.503	0.4347	0.5788	0.5685	0.4872	0.535	0.5144	1.2078	1.1949	1.1949	1.1949	0.4119	1.4501	0.5147	0.4119	0.4935	0.4935	0.6625	0.5509	0.5541	0.4409	1.2172
gchola[c][e]	-0.1492	0.3533	0.3169	0.3169	0.3169	0.3313	0.3313	0.3416	0.3317	0.3173	0.3173	0.4849	0.2906	0.4501	0.3169	0.9052	0.2944	0.3486	1.5384	0.548	0.548	0.548	0.5014	0.4809	0.5102	0.0683	0.503	0.503	0.4347	0.5788	0.5685	0.4872	0.535	0.5144	1.2078	1.1949	1.1949	1.1949	0.4119	1.4501	0.5147	0.4119	0.4935	0.4935	0.6625	0.5509	0.5541	0.4409	1.2172
gd1a_hs[c][e][g][n]	-0.1492	0.3533	0.3169	0.3169	0.3169	0.3313	0.3313	0.3416	0.3317	0.3173	0.3173	0.4849	0.2906	0.4501	0.3169	0.9052	0.2944	0.3486	1.5384	0.548	0.548	0.548	0.5014	0.4809	0.5102	0.0683	0.503	0.503	0.4347	0.5788	0.5685	0.4872	0.535	0.5144	1.2078	1.1949	1.1949	1.1949	0.4119	1.4501	0.5147	0.4119	0.4935	0.4935	0.6625	0.5509	0.5541	0.4409	1.2172
gd1b_hs[c][e][g][l]	-0.1492	0.3533	0.3169	0.3169	0.3169	0.3313	0.3313	0.3416	0.3317	0.3173	0.3173	0.4849	0.2906	0.4501	0.3169	0.9052	0.2944	0.3486	1.5384	0.548	0.548	0.548	0.5014	0.4809	0.5102	0.0688	0.503	0.503	0.4347	0.5788	0.5685	0.4872	0.535	0.5144	1.2078	1.1949	1.1949	1.1949	0.4119	1.4501	0.5147	0.4119	0.4935	0.4935	0.6625	0.5509	0.5541	0.4409	1.2172
gd1b2_hs[c][e][g]	-0.1492	0.3533	0.3169	0.3169	0.3169	0.3313	0.3313	0.3416	0.3317	0.3173	0.3173	0.4849	0.2906	0.4501	0.3169	0.9052	0.2944	0.3486	1.5384	0.548	0.548	0.548	0.5014	0.4809	0.5105	0.0688	0.503	0.503	0.4347	0.5788	0.5685	0.4872	0.535	0.5144	1.2078	1.1949	1.1949	1.1949	0.4119	1.4501	0.5147	0.4119	0.4935	0.4935	0.6625	0.5509	0.5541	0.4409	1.2174
gd1c_hs[c][e][g]	-0.1492	0.3533	0.3169	0.3169	0.3169	0.3313	0.3313	0.3416	0.3317	0.3173	0.3173	0.4849	0.2906	0.4501	0.3169	0.9052	0.2944	0.3486	1.5384	0.548	0.548	0.548	0.5014	0.4809	0.5105	0.0688	0.503	0.503	0.4347	0.5788	0.5685	0.4872	0.535	0.5144	1.2078	1.1949	1.1949	1.1949	0.4119	1.4501	0.5147	0.4119	0.4935	0.4935	0.6625	0.5509	0.5541	0.4409	1.2174
gda1_hs[n]	-0.1492	0.3533	0.3169	0.3169	0.3169	0.3313	0.3313	0.3416	0.3317	0.3173	0.3173	0.4849	0.2906	0.4501	0.3169	0.9052	0.2944	0.3486	1.5384	0.548	0.548	0.548	0.5014	0.4809	0.5102	0.0683	0.503	0.503	0.4347	0.5788	0.5685	0.4872	0.535	0.5144	1.2078	1.1949	1.1949	1.1949	0.4119	1.4501	0.5147	0.4119	0.4935	0.4935	0.6625	0.5509	0.5541	0.4409	1.2172
gdca3s[c][e]	-0.1492	0.3533	0.3169	0.3169	0.3169	0.3313	0.3313	0.3416	0.3317	0.3173	0.3173	0.4849	0.2906	0.4501	0.3169	0.9052	0.2944	0.3486	1.5384	0.548	0.548	0.548	0.5014	0.4809	0.5102	0.0683	0.503	0.503	0.4347	0.5788	0.5685	0.4872	0.535	0.5144	1.2078	1.1949	1.1949	1.1949	0.4119	1.4501	0.5147	0.4119	0.4935	0.4935	0.6625	0.5509	0.5541	0.4409	1.2172
gdp[c][e][g][m][n]	-2.1964	-0.3651	-0.365	-0.365	-0.365	-0.365	-0.365	-0.365	-0.365	-0.365	-0.365	-0.365	-0.365	-0.365	-0.365	-0.3649	-0.365	-0.365	0.9001	0.5494	0.5494	0.5494	0.5494	0.5824	0.5494	-0.8673	0.5494	0.5494	0.7938	0.5494	0.5494	0.8672	0.5494	0.5494	0.4511	0.4511	0.4511	0.4511	0.4511	0.4511	0.4511	0.4511	0.4511	0.4511	0.4511	0.4511	0.4511	0.4511	0.4511
gdpfuc[c][g]	-0.1492	0.3531	0.3169	0.3169	0.3169	0.3314	0.3313	0.3416	0.3317	0.3173	0.3173	0.4847	0.2906	0.4501	0.3169	0.9052	0.2944	0.3486	1.5384	0.5479	0.5479	0.5479	0.5012	0.4808	0.5103	0.0688	0.5028	0.5028	0.4347	0.5786	0.5683	0.487	0.5348	0.5142	1.2078	1.1949	1.1949	1.1949	0.4119	1.45	0.5146	0.4119	0.4935	0.4935	0.6625	0.5509	0.5541	0.4409	1.2173
glac[c][r]	-0.1492	0.3533	0.3169	0.3169	0.3169	0.3317	0.3313	0.342	0.3317	0.3173	0.3173	0.4849	0.2906	0.4501	0.3169	0.9052	0.2944	0.3486	1.5382	0.5477	0.5477	0.5477	0.501	0.4806	0.5102	0.0688	0.503	0.503	0.4347	0.5785	0.5685	0.4869	0.5347	0.5141	1.2078	1.1949	1.1949	1.1949	0.4119	1.4501	0.5147	0.4119	0.4935	0.4935	0.6625	0.5509	0.5541	0.4409	1.2174
glc_D[c][e][g][l][r]	0.4803	0.4582	0.4603	0.4603	0.4603	0.4603	0.4603	0.4603	0.4603	0.4603	0.4603	0.4604	0.4603	0.4604	0.4603	0.4604	0.4603	0.4604	-0.5041	-1.8942	-1.8942	-1.8942	-1.8942	-1.7235	-1.8942	0.5545	-1.8942	-1.8942	-0.9534	-1.8942	-1.8942	-0.6492	-1.8942	-1.8942	-1.9008	-1.9	-1.9	-1.9	-1.9003	-1.8999	-1.9003	-1.9003	-1.9003	-1.9003	-1.9002	-1.9002	-1.9002	-1.9003	-1.9
glc3meacp[c][e][r]	-0.1492	0.3533	0.3169	0.3169	0.3169	0.3317	0.3313	0.3416	0.3317	0.3173	0.3173	0.4849	0.2906	0.4501	0.3169	0.9052	0.2944	0.3486	1.5384	0.548	0.548	0.548	0.5014	0.4809	0.5105	0.0688	0.503	0.503	0.4347	0.5788	0.5685	0.4872	0.535	0.5144	1.2078	1.1949	1.1949	1.1949	0.4119	1.4501	0.5147	0.4119	0.4935	0.4935	0.6625	0.5509	0.5541	0.4409	1.2174
glcr[c][e]	-0.1492	0.3533	0.3169	0.3169	0.3169	0.3317	0.3313	0.342	0.3317	0.3173	0.3173	0.4849	0.2906	0.4501	0.3169	0.9052	0.2944	0.3486	1.5382	0.5477	0.5477	0.5477	0.501	0.4806	0.5102	0.0688	0.503	0.503	0.4347	0.5785	0.5685	0.4869	0.5347	0.5141	1.2078	1.1949	1.1949	1.1949	0.4119	1.4501	0.5147	0.4119	0.4935	0.4935	0.6625	0.5509	0.5541	0.4409	1.2174
glcur[c][e][l][r]	0.8752	0.5331	0.5262	0.5262	0.5262	0.5262	0.5262	0.5262	0.5262	0.5262	0.5262	0.5263	0.5262	0.5263	0.5262	0.5267	0.5262	0.5262	1.8244	-0.0433	-0.0433	-0.0433	-0.0433	0.2132	-0.0433	0.7543	-0.0433	-0.0433	1.2297	-0.0432	-0.0432	1.6679	-0.0433	-0.0433	-0.6541	-0.661	-0.661	-0.661	-0.6629	-0.6601	-0.6627	-0.6629	-0.6628	-0.6628	-0.6624	-0.6627	-0.6627	-0.6629	-0.6609
gln_L[c][e][m]	0.1521	0.1095	0.11	0.11	0.11	0.11	0.11	0.11	0.11	0.11	0.11	0.1101	0.11	0.1101	0.11	0.1102	0.11	0.11	0.582	0.3745	0.3745	0.3745	0.3745	0.3861	0.3745	0.0744	0.3745	0.3745	0.4389	0.3745	0.3745	0.5332	0.3745	0.3745	0.3587	0.3587	0.3587	0.3587	0.3585	0.3588	0.3585	0.3585	0.3585	0.3585	0.3585	0.3585	0.3585	0.3585	0.3587
glnasngln[c][e]	-0.1492	0.3533	0.3169	0.3169	0.3169	0.3317	0.3313	0.3416	0.3317	0.3173	0.3173	0.4849	0.2906	0.4501	0.3169	0.9052	0.2944	0.3486	1.5384	0.548	0.548	0.548	0.5014	0.4809	0.5105	0.0688	0.503	0.503	0.4347	0.5788	0.5685	0.4872	0.535	0.5144	1.2078	1.1949	1.1949	1.1949	0.4119	1.4501	0.5147	0.4119	0.4935	0.4935	0.6625	0.5509	0.5541	0.4409	1.2174
glnhishis[c][e]	-0.1492	0.3533	0.3169	0.3169	0.3169	0.3317	0.3313	0.3416	0.3317	0.3173	0.3173	0.4849	0.2906	0.4501	0.3169	0.9052	0.2944	0.3486	1.5385	0.548	0.548	0.548	0.5014	0.4809	0.5105	0.0688	0.503	0.503	0.4347	0.5788	0.5685	0.4872	0.535	0.5144	1.2078	1.1949	1.1949	1.1949	0.4119	1.4501	0.5147	0.4119	0.4935	0.4935	0.6625	0.5509	0.5541	0.4409	1.2174
glnhislys[c][e]	-0.1492	0.3533	0.3169	0.3169	0.3169	0.3317	0.3313	0.3416	0.3317	0.3173	0.3173	0.4849	0.2906	0.4501	0.3169	0.9052	0.2944	0.3486	1.5384	0.548	0.548	0.548	0.5014	0.4809	0.5105	0.0688	0.503	0.503	0.4347	0.5788	0.5685	0.4872	0.535	0.5144	1.2078	1.1949	1.1949	1.1949	0.4119	1.4501	0.5147	0.4119	0.4935	0.4935	0.6625	0.5509	0.5541	0.4409	1.2174
glnlyslys[c][e]	-0.1492	0.3533	0.3169	0.3169	0.3169	0.3317	0.3313	0.3416	0.3317	0.3173	0.3173	0.4849	0.2906	0.4501	0.3169	0.9052	0.2944	0.3486	1.5384	0.548	0.548	0.548	0.5014	0.4809	0.5105	0.0688	0.503	0.503	0.4347	0.5788	0.5685	0.4872	0.535	0.5144	1.2078	1.1949	1.1949	1.1949	0.4119	1.4501	0.5147	0.4119	0.4935	0.4935	0.6625	0.5509	0.5541	0.4409	1.2174
glnlystrp[c][e]	-0.1492	0.3533	0.3169	0.3169	0.3169	0.3317	0.3313	0.3416	0.3317	0.3173	0.3173	0.4849	0.2906	0.4501	0.3169	0.9052	0.2944	0.3486	1.5384	0.548	0.548	0.548	0.5014	0.4809	0.5105	0.0688	0.503	0.503	0.4347	0.5788	0.5685	0.4872	0.535	0.5144	1.2078	1.1949	1.1949	1.1949	0.4119	1.4501	0.5147	0.4119	0.4935	0.4935	0.6625	0.5509	0.5541	0.4409	1.2174
glnproglu[c][e]	-0.1492	0.3533	0.3169	0.3169	0.3169	0.3313	0.3313	0.3416	0.3317	0.3173	0.3173	0.4849	0.2906	0.4501	0.3169	0.9052	0.2944	0.3486	1.5384	0.548	0.548	0.548	0.5014	0.4809	0.5105	0.0688	0.503	0.503	0.4347	0.5788	0.5685	0.4872	0.535	0.5144	1.2078	1.1949	1.1949	1.1949	0.4119	1.4501	0.5147	0.4119	0.4935	0.4935	0.6625	0.5509	0.5541	0.4409	1.2174
glntrpglu[c][e]	-0.1492	0.3533	0.3169	0.3169	0.3169	0.3317	0.3313	0.3416	0.3317	0.3173	0.3173	0.4849	0.2906	0.4501	0.3169	0.9052	0.2944	0.3486	1.5384	0.548	0.548	0.548	0.5014	0.4809	0.5105	0.0688	0.503	0.503	0.4347	0.5788	0.5685	0.4872	0.535	0.5144	1.2078	1.1949	1.1949	1.1949	0.4119	1.4501	0.5147	0.4119	0.4935	0.4935	0.6625	0.5509	0.5541	0.4409	1.2174
glntyrleu[c][e]	-0.1492	0.3533	0.3169	0.3169	0.3169	0.3317	0.3313	0.3416	0.3317	0.3173	0.3173	0.4849	0.2906	0.4501	0.3169	0.9052	0.2944	0.3486	1.5384	0.548	0.548	0.548	0.5014	0.4809	0.5105	0.0688	0.503	0.503	0.4347	0.5788	0.5685	0.4872	0.535	0.5144	1.2078	1.1949	1.1949	1.1949	0.4119	1.4501	0.5147	0.4119	0.4935	0.4935	0.6625	0.5509	0.5541	0.4409	1.2174
glu_L[c][e][l][m][r]	0.3426	0.2993	0.2994	0.2994	0.2994	0.2994	0.2994	0.2994	0.2994	0.2994	0.2994	0.2994	0.2994	0.2994	0.2994	0.2994	0.2994	0.2994	1.7036	0.979	0.979	0.979	0.979	1.0588	0.979	-0.1964	0.979	0.979	1.4001	0.979	0.979	1.6198	0.979	0.979	0.9263	0.9263	0.9263	0.9263	0.9262	0.9263	0.9263	0.9262	0.9263	0.9263	0.9263	0.9263	0.9263	0.9263	0.9263
glu5sa[c][m]	-0.6962	-0.6701	-0.6701	-0.6701	-0.6701	-0.6701	-0.6701	-0.6701	-0.6701	-0.6701	-0.6701	-0.67	-0.6701	-0.67	-0.6701	-0.67	-0.6701	-0.6701	-0.6699	-0.67	-0.67	-0.67	-0.67	-0.67	-0.67	-2.5152	-0.67	-0.67	-0.6701	-0.67	-0.67	-0.67	-0.67	-0.67	-0.67	-0.67	-0.67	-0.67	-0.6701	-0.6699	-0.67	-0.6701	-0.67	-0.67	-0.67	-0.67	-0.67	-0.67	-0.67
gluala[e]	0	0	0	0	0	0	0	0	0	0	0	0	0	0	0	0	0	0	0	0	0	0	0	0	0	0	0	0	0	0	0	0	0	0	0	0	0	0	0	0	0	0	0	0	0	0	0	0	0
gluargleu[c][e]	-0.1492	0.3533	0.3169	0.3169	0.3169	0.3317	0.3313	0.3416	0.3317	0.3173	0.3173	0.4849	0.2906	0.4501	0.3169	0.9052	0.2944	0.3486	1.5384	0.548	0.548	0.548	0.5014	0.4809	0.5105	0.0688	0.503	0.503	0.4347	0.5788	0.5685	0.4872	0.535	0.5144	1.2078	1.1949	1.1949	1.1949	0.4119	1.4501	0.5147	0.4119	0.4935	0.4935	0.6625	0.5509	0.5541	0.4409	1.2174
gluasnleu[c][e]	-0.1492	0.3533	0.3169	0.3169	0.3169	0.3317	0.3313	0.3416	0.3317	0.3173	0.3173	0.4849	0.2906	0.4501	0.3169	0.9052	0.2944	0.3486	1.5384	0.548	0.548	0.548	0.5014	0.4809	0.5105	0.0688	0.503	0.503	0.4347	0.5788	0.5685	0.4872	0.535	0.5144	1.2078	1.1949	1.1949	1.1949	0.4119	1.4501	0.5147	0.4119	0.4935	0.4935	0.6625	0.5509	0.5541	0.4409	1.2174
gluglu[c][e]	-0.1492	0.3533	0.3169	0.3169	0.3169	0.3313	0.3313	0.3416	0.3317	0.3173	0.3173	0.4849	0.2906	0.4501	0.3169	0.9052	0.2944	0.3486	1.5384	0.548	0.548	0.548	0.5014	0.4809	0.5102	0.0683	0.503	0.503	0.4347	0.5788	0.5685	0.4872	0.535	0.5144	1.2078	1.1949	1.1949	1.1949	0.4119	1.4501	0.5147	0.4119	0.4935	0.4935	0.6625	0.5509	0.5541	0.4409	1.2172
gluilelys[c][e]	-0.1492	0.3533	0.3169	0.3169	0.3169	0.3317	0.3313	0.3416	0.3317	0.3173	0.3173	0.4849	0.2906	0.4501	0.3169	0.9052	0.2944	0.3486	1.5384	0.548	0.548	0.548	0.5014	0.4809	0.5105	0.0688	0.503	0.503	0.4347	0.5788	0.5685	0.4872	0.535	0.5144	1.2078	1.1949	1.1949	1.1949	0.4119	1.4501	0.5147	0.4119	0.4935	0.4935	0.6625	0.5509	0.5541	0.4409	1.2174
gluleu[c][e]	-0.1492	0.3533	0.3169	0.3169	0.3169	0.3313	0.3313	0.3416	0.3317	0.3173	0.3173	0.4849	0.2906	0.4501	0.3169	0.9052	0.2944	0.3486	1.5384	0.548	0.548	0.548	0.5014	0.4809	0.5102	0.0683	0.503	0.503	0.4347	0.5788	0.5685	0.4872	0.535	0.5144	1.2078	1.1949	1.1949	1.1949	0.4119	1.4501	0.5147	0.4119	0.4935	0.4935	0.6625	0.5509	0.5541	0.4409	1.2172
glumet[c][e]	-0.1492	0.3533	0.3169	0.3169	0.3169	0.3313	0.3313	0.3416	0.3317	0.3173	0.3173	0.4849	0.2906	0.4501	0.3169	0.9052	0.2944	0.3486	1.5384	0.548	0.548	0.548	0.5014	0.4809	0.5102	0.0683	0.503	0.503	0.4347	0.5788	0.5685	0.4872	0.535	0.5144	1.2078	1.1949	1.1949	1.1949	0.4119	1.4501	0.5147	0.4119	0.4935	0.4935	0.6625	0.5509	0.5541	0.4409	1.2172
glumethis[c][e]	-0.1492	0.3533	0.3169	0.3169	0.3169	0.3317	0.3313	0.3416	0.3317	0.3173	0.3173	0.4849	0.2906	0.4501	0.3169	0.9052	0.2944	0.3486	1.5384	0.548	0.548	0.548	0.5014	0.4809	0.5105	0.0688	0.503	0.503	0.4347	0.5788	0.5685	0.4872	0.535	0.5144	1.2078	1.1949	1.1949	1.1949	0.4119	1.4501	0.5147	0.4119	0.4935	0.4935	0.6625	0.5509	0.5541	0.4409	1.2174
gluside_hs[c][e][g][l][r]	-0.149	0.3531	0.3169	0.3169	0.3169	0.3315	0.3313	0.3417	0.3316	0.3171	0.3171	0.4848	0.2906	0.45	0.3169	0.9052	0.2944	0.3487	1.5383	0.5477	0.5477	0.5477	0.5009	0.4808	0.51	0.0687	0.5027	0.5027	0.4347	0.5786	0.5683	0.487	0.5347	0.514	1.2077	1.1948	1.1948	1.1948	0.4118	1.4499	0.5146	0.4118	0.4933	0.4933	0.6623	0.5507	0.5538	0.4408	1.2172
glutcoa[c][m]	-0.1492	0.3533	0.3169	0.3169	0.3169	0.3317	0.3313	0.3416	0.3317	0.3173	0.3173	0.4849	0.2906	0.4501	0.3169	0.9052	0.2944	0.3486	1.5384	0.548	0.548	0.548	0.5014	0.4809	0.5105	0.0688	0.503	0.503	0.4347	0.5788	0.5685	0.4872	0.535	0.5144	1.2078	1.1949	1.1949	1.1949	0.4119	1.4501	0.5147	0.4119	0.4935	0.4935	0.6625	0.5509	0.5541	0.4409	1.2174
gluthr[c][e]	-0.1492	0.3533	0.3169	0.3169	0.3169	0.3313	0.3313	0.3416	0.3317	0.3173	0.3173	0.4849	0.2906	0.4501	0.3169	0.9052	0.2944	0.3486	1.5384	0.548	0.548	0.548	0.5014	0.4809	0.5102	0.0683	0.503	0.503	0.4347	0.5788	0.5685	0.4872	0.535	0.5144	1.2078	1.1949	1.1949	1.1949	0.4119	1.4501	0.5147	0.4119	0.4935	0.4935	0.6625	0.5509	0.5541	0.4409	1.2172
gluthrlys[c][e]	-0.1492	0.3533	0.3169	0.3169	0.3169	0.3317	0.3313	0.3416	0.3317	0.3173	0.3173	0.4849	0.2906	0.4501	0.3169	0.9052	0.2944	0.3486	1.5384	0.548	0.548	0.548	0.5014	0.4809	0.5105	0.0688	0.503	0.503	0.4347	0.5788	0.5685	0.4872	0.535	0.5144	1.2078	1.1949	1.1949	1.1949	0.4119	1.4501	0.5147	0.4119	0.4935	0.4935	0.6625	0.5509	0.5541	0.4409	1.2174
glutrpala[c][e]	-0.1492	0.3533	0.3169	0.3169	0.3169	0.3313	0.3313	0.3416	0.3317	0.3173	0.3173	0.4849	0.2906	0.4501	0.3169	0.9052	0.2944	0.3486	1.5384	0.548	0.548	0.548	0.5014	0.4809	0.5105	0.0688	0.503	0.503	0.4347	0.5788	0.5685	0.4872	0.535	0.5144	1.2078	1.1949	1.1949	1.1949	0.4119	1.4501	0.5147	0.4119	0.4935	0.4935	0.6625	0.5509	0.5541	0.4409	1.2174
glx[c][e][m][x]	-14.091	0.9748	0.9765	0.9765	0.9765	0.9765	0.9765	0.9765	0.9765	0.9765	0.9765	0.9765	0.9765	0.9765	0.9765	0.9765	0.9765	0.9765	-12.4071	-3.3725	-3.3725	-3.3725	-3.3725	-5.2156	-3.3725	0.4526	-3.3725	-3.3725	-13.51	-3.3724	-3.3725	-13.4583	-3.3725	-3.3725	-4.145	-4.145	-4.145	-4.145	-4.1463	-4.1445	-4.1462	-4.1463	-4.1462	-4.1462	-4.146	-4.1461	-4.1461	-4.1463	-4.145
gly[c][e][m][x]	0.507	0.9444	0.9433	0.9433	0.9433	0.9433	0.9433	0.9434	0.9433	0.9433	0.9433	0.9434	0.9433	0.9434	0.9433	0.9434	0.9433	0.9434	1.1514	0.171	0.171	0.171	0.171	0.2348	0.171	1.2356	0.171	0.171	0.7241	0.171	0.171	1.0204	0.171	0.171	0.065	0.065	0.065	0.065	0.0649	0.0651	0.0649	0.0649	0.0649	0.0649	0.0649	0.0649	0.0649	0.0649	0.065
glyald[c][e][m]	0.8369	0.6654	0.6651	0.6651	0.6651	0.6651	0.6651	0.6651	0.6651	0.6651	0.6651	0.6651	0.6651	0.6651	0.6651	0.6651	0.6651	0.6651	-2.8357	-1.0643	-1.0643	-1.0643	-1.0643	-1.5489	-1.0643	1.3865	-1.0643	-1.0643	-6.5192	-1.0643	-1.0643	-3.625	-1.0643	-1.0643	-0.5401	-0.5404	-0.5404	-0.5404	-0.5404	-0.5404	-0.5404	-0.5404	-0.5404	-0.5404	-0.5404	-0.5404	-0.5404	-0.5404	-0.5404
glyb[c][e][m]	0.144	0.2291	0.2293	0.2293	0.2293	0.2293	0.2293	0.2293	0.2293	0.2293	0.2293	0.2293	0.2293	0.2293	0.2293	0.2294	0.2293	0.2293	1.6083	0.7746	0.7746	0.7746	0.7746	0.8539	0.7746	0.1536	0.7746	0.7746	1.258	0.7746	0.7746	1.5027	0.7746	0.7746	0.6771	0.6771	0.6771	0.6771	0.6771	0.6771	0.6771	0.6771	0.6771	0.6771	0.6771	0.6771	0.6771	0.6771	0.6771
glyc[c][e][m]	0.9953	0.8084	0.808	0.808	0.808	0.808	0.808	0.808	0.808	0.808	0.808	0.808	0.808	0.808	0.808	0.808	0.808	0.808	-1.5253	-13.344	-13.344	-13.344	-13.3907	-13.4189	-13.3816	1.6357	-13.389	-13.389	-5.2109	-13.314	-13.3238	-2.3145	-13.357	-13.3775	-12.6871	-12.6999	-12.6999	-12.6999	-13.483	-12.445	-13.3804	-13.483	-13.4015	-13.4015	-13.2336	-13.3447	-13.3418	-13.4541	-12.6776
glyc_R[c][e][m]	0.7898	0.6257	0.626	0.626	0.626	0.626	0.626	0.626	0.626	0.626	0.626	0.626	0.626	0.626	0.626	0.626	0.626	0.626	1.2007	-0.5263	-0.5263	-0.5263	-0.5263	-0.3269	-0.5263	1.2783	-0.5263	-0.5263	0.5228	-0.5263	-0.5263	0.9945	-0.5263	-0.5263	-0.7902	-0.7904	-0.7904	-0.7904	-0.7904	-0.7904	-0.7904	-0.7904	-0.7904	-0.7904	-0.7904	-0.7904	-0.7904	-0.7904	-0.7904
glyc_S[c][e]	0	0	0	0	0	0	0	0	0	0	0	0	0	0	0	0	0	0	0	0	0	0	0	0	0	0	0	0	0	0	0	0	0	0	32.3048	32.5113	32.5113	32.5113	32.5113	32.5113	32.5113	32.5113	32.5113	32.5113	32.5113	32.5113	32.5113	32.5113	32.5113
glyc3p[c][e][m]	1.0164	0.8612	0.8617	0.8617	0.8617	0.8617	0.8617	0.8617	0.8617	0.8617	0.8617	0.8617	0.8617	0.8617	0.8617	0.8617	0.8617	0.8617	-1.2309	-3.3412	-3.3412	-3.3412	-3.3413	-2.8982	-3.3413	1.7349	-3.3413	-3.3413	-1.5198	-3.3412	-3.3412	-1.3161	-3.3413	-3.3413	-3.5897	-3.5535	-3.5535	-3.5535	-3.5547	-3.5529	-3.5545	-3.5547	-3.5546	-3.5546	-3.5543	-3.5545	-3.5545	-3.5546	-3.5534
glyclt[c][e][m][x]	-0.1441	0.3581	0.322	0.3218	0.322	0.3366	0.3366	0.3469	0.3366	0.3222	0.3222	0.4898	0.2959	0.4553	0.322	0.9102	0.2997	0.3536	1.5435	0.5528	0.5528	0.5528	0.5061	0.4858	0.515	0.0738	0.5077	0.5077	0.4398	0.5835	0.5732	0.4923	0.5397	0.5191	1.2127	1.1998	1.1998	1.1998	0.417	1.455	0.5197	0.417	0.4985	0.4985	0.6671	0.5558	0.5589	0.4459	1.2222
glygly[c]	-6.9634	-6.4613	-6.4976	-6.4976	-6.4976	-6.4828	-6.4828	-6.4726	-6.4828	-6.4973	-6.4973	-6.3296	-6.5235	-6.3645	-6.4976	-5.9092	-6.5197	-6.4656	-5.275	-6.2696	-6.2696	-6.2696	-6.3161	-6.3329	-6.3069	-6.7459	-6.3145	-6.3145	-6.3788	-6.2379	-6.2485	-6.327	-6.2827	-6.303	-5.6114	-5.6243	-5.6243	-5.6243	-6.4075	-5.3692	-6.3047	-6.4075	-6.326	-6.326	-6.1599	-6.2674	-6.2639	-6.3784	-5.6019
glygn3[c]	-0.1492	0.3533	0.3169	0.3169	0.3169	0.3313	0.3313	0.3416	0.3317	0.3173	0.3173	0.4849	0.2906	0.4501	0.3169	0.9052	0.2944	0.3486	1.5384	0.548	0.548	0.548	0.5014	0.4809	0.5102	0.0688	0.503	0.503	0.4347	0.5788	0.5685	0.4872	0.535	0.5144	1.2078	1.1949	1.1949	1.1949	0.4119	1.4501	0.5147	0.4119	0.4935	0.4935	0.6625	0.5509	0.5541	0.4409	1.2172
glyhisasn[c][e]	-12.0954	-1.9483	-1.9455	-1.9455	-1.9455	-1.9455	-1.9455	-1.9455	-1.9455	-1.9455	-1.9455	-1.9455	-1.9455	-1.9455	-1.9455	-1.9455	-1.9455	-1.9455	1.7406	1.7334	1.7334	1.7334	1.7334	1.76	1.7334	-11.8788	1.7334	1.7334	1.7326	1.7334	1.7334	1.7438	1.7334	1.7334	1.6939	1.694	1.694	1.694	1.694	1.694	1.694	1.694	1.694	1.694	1.694	1.694	1.694	1.694	1.694
glyhislys[c][e]	-10.3139	-9.8125	-9.8489	-9.8489	-9.8489	-9.8341	-9.8345	-9.8242	-9.8341	-9.8485	-9.8485	-9.6811	-9.8752	-9.7157	-9.8489	-9.2607	-9.8714	-9.8172	2.7005	2.6523	2.6523	2.6523	2.6523	2.6588	2.6523	-10.0964	2.6523	2.6523	2.6574	2.6523	2.6523	2.7171	2.6523	2.6523	2.6213	2.6213	2.6213	2.6213	2.6213	2.6213	2.6213	2.6213	2.6213	2.6213	2.6213	2.6213	2.6213	2.6213	2.6213
glyleu[c]	-11.1043	-1.7293	-1.7292	-1.7292	-1.7292	-1.7292	-1.7292	-1.7292	-1.7292	-1.7292	-1.7292	-1.7292	-1.7292	-1.7292	-1.7292	-1.7292	-1.7292	-1.7292	-9.4171	1.3868	1.3868	1.3868	1.3868	1.4106	1.3868	-10.8882	1.3868	1.3868	-3.0205	1.3868	1.3868	-10.4684	1.3868	1.3868	1.3839	1.3841	1.3841	1.3841	1.3841	1.3841	1.3841	1.3841	1.3841	1.3841	1.3841	1.3841	1.3841	1.3841	1.3841
glylyscys[c][e]	-10.3344	-9.8333	-9.8697	-9.8697	-9.8697	-9.8549	-9.8553	-9.845	-9.8549	-9.8693	-9.8693	-9.7019	-9.896	-9.7368	-9.8697	-9.2816	-9.8922	-9.838	-8.6468	-9.6371	-9.6371	-9.6371	-9.6838	-9.7042	-9.675	-10.1168	-9.6821	-9.6821	-9.7504	-9.6064	-9.6166	-9.6979	-9.6501	-9.6707	-8.9771	-8.99	-8.99	-8.99	-9.7732	-8.7349	-9.6704	-9.7732	-9.6917	-9.6917	-9.5226	-9.6342	-9.6311	-9.7443	-8.9677
glylysphe[c][e]	-10.9924	-10.4972	-10.5337	-10.5337	-10.5337	-10.5192	-10.5196	-10.5092	-10.5192	-10.5337	-10.5337	-10.3659	-10.5597	-10.4013	-10.5337	-9.9446	-10.5559	-10.5026	0.1889	1.5344	1.5344	1.5344	1.5344	1.5031	1.5344	-10.7753	1.5344	1.5344	1.2961	1.5344	1.5344	0.6642	1.5344	1.5344	1.6109	1.611	1.611	1.611	1.611	1.611	1.611	1.611	1.611	1.611	1.611	1.611	1.611	1.611	1.611
glyphe[c]	-11.0939	-0.2691	-0.2669	-0.2669	-0.2669	-0.2669	-0.2669	-0.2669	-0.2669	-0.2669	-0.2669	-0.2669	-0.2669	-0.2669	-0.2669	-0.2669	-0.2669	-0.2669	1.7164	0.8107	0.8107	0.8107	0.8107	1.0273	0.8107	-10.88	0.8107	0.8107	2.0617	0.8107	0.8107	1.8341	0.8107	0.8107	0.8861	0.8867	0.8867	0.8867	0.8867	0.8867	0.8867	0.8867	0.8867	0.8867	0.8867	0.8867	0.8867	0.8867	0.8867
glypro[c][e]	-0.1474	0.3548	0.3184	0.3184	0.3184	0.3332	0.3328	0.3435	0.3332	0.3188	0.3188	0.4864	0.2921	0.4516	0.3184	0.9068	0.2959	0.3504	1.5309	10.6638	10.6638	10.6638	10.6638	10.424	10.6638	0.0702	10.6638	10.6638	10.2721	10.6638	10.6638	8.4192	10.6638	10.6638	10.8492	10.8487	10.8487	10.8487	10.8487	10.8487	10.8487	10.8487	10.8487	10.8487	10.8487	10.8487	10.8487	10.8487	10.8487
glysar[c][e]	-0.1492	0.3533	0.3169	0.3169	0.3169	0.3317	0.3313	0.3416	0.3317	0.3173	0.3173	0.4849	0.2906	0.4501	0.3169	0.9052	0.2944	0.3486	1.5384	0.548	0.548	0.548	0.5014	0.4809	0.5105	0.0688	0.503	0.503	0.4347	0.5788	0.5685	0.4872	0.535	0.5144	1.2078	1.1949	1.1949	1.1949	0.4119	1.4501	0.5147	0.4119	0.4935	0.4935	0.6625	0.5509	0.5541	0.4409	1.2174
glytyrlys[c][e]	-0.1492	0.3529	0.3169	0.3165	0.3165	0.3313	0.3313	0.3416	0.3313	0.3169	0.3169	0.4846	0.2906	0.4501	0.3169	0.905	0.2944	0.3486	1.5384	0.548	0.548	0.548	0.5014	0.4809	0.5102	0.0683	0.503	0.503	0.4347	0.5788	0.5685	0.4872	0.535	0.5144	1.2078	1.1949	1.1949	1.1949	0.4119	1.4501	0.5147	0.4119	0.4935	0.4935	0.6625	0.5509	0.5541	0.4409	1.2172
glyvalhis[c][e]	-9.7657	-9.2632	-9.2996	-9.2996	-9.2996	-9.2848	-9.2852	-9.2749	-9.2848	-9.2992	-9.2992	-9.1316	-9.3259	-9.1665	-9.2996	-8.7113	-9.3221	-9.268	-8.0782	-9.0685	-9.0685	-9.0685	-9.1152	-9.1356	-9.1063	-9.5482	-9.1135	-9.1135	-9.1818	-9.0381	-9.048	-9.1296	-9.0815	-9.1021	-8.4081	-8.421	-8.421	-8.421	-9.2043	-8.166	-9.1015	-9.2043	-9.1227	-9.1227	-8.9537	-9.0653	-9.0621	-9.1753	-8.3987
gm1_hs[c][e][g][l][n]	-0.1492	0.3529	0.3165	0.3165	0.3165	0.3313	0.3313	0.3416	0.3313	0.3169	0.3169	0.4846	0.2906	0.4497	0.3165	0.905	0.2944	0.3486	1.538	0.5474	0.5474	0.5474	0.5007	0.4803	0.5098	0.0683	0.5023	0.5023	0.4344	0.5782	0.5682	0.4866	0.5344	0.5137	1.2078	1.1949	1.1949	1.1949	0.4119	1.4499	0.5147	0.4119	0.4935	0.4935	0.6622	0.5506	0.5537	0.4409	1.2172
gmp[c][e][g][l]	3.8176	0.353	0.3169	0.3169	0.3169	0.3314	0.3313	0.3417	0.3317	0.3172	0.3172	0.4846	0.2906	0.45	0.3169	0.9051	0.2944	0.3481	1.5384	0.5478	0.5478	0.5478	0.5011	0.4807	0.5102	0.0685	0.5027	0.5027	0.4347	0.5786	0.5683	0.487	0.5347	0.5141	1.2079	1.195	1.195	1.195	0.4119	1.45	0.5145	0.4119	0.4934	0.4934	0.6627	0.5509	0.5541	0.4408	1.2173
gq1b_hs[c][e][g]	-0.1492	0.3533	0.3169	0.3169	0.3169	0.3315	0.3313	0.3416	0.3317	0.3173	0.3173	0.4849	0.2906	0.4501	0.3169	0.9052	0.2944	0.3486	1.5384	0.548	0.548	0.548	0.5014	0.4809	0.5103	0.0685	0.503	0.503	0.4347	0.5788	0.5685	0.4872	0.535	0.5144	1.2078	1.1949	1.1949	1.1949	0.4119	1.4501	0.5147	0.4119	0.4935	0.4935	0.6625	0.5509	0.5541	0.4409	1.2174
gq1balpha_hs[c][e][g]	-0.1492	0.3533	0.3169	0.3169	0.3169	0.3315	0.3313	0.3416	0.3317	0.3173	0.3173	0.4849	0.2906	0.4501	0.3169	0.9052	0.2944	0.3486	1.5384	0.548	0.548	0.548	0.5014	0.4809	0.5103	0.0685	0.503	0.503	0.4347	0.5788	0.5685	0.4872	0.535	0.5144	1.2078	1.1949	1.1949	1.1949	0.4119	1.4501	0.5147	0.4119	0.4935	0.4935	0.6625	0.5509	0.5541	0.4409	1.2174
grdp[c][x]	30.926	0	0	0	0	0	0	0	0	0	0	0	0	0	0	0	0	0	0	0	0	0	0	0	0	0	0	0	0	0	0	0	0	0	0	0	0	0	0	0	0	0	0	0	0	0	0	0	0
gsn[c][e][l]	-0.2203	-1.7772	-1.7818	-1.7818	-1.7818	-1.7817	-1.7817	-1.7817	-1.7817	-1.7818	-1.7818	-1.7815	-1.7818	-1.7815	-1.7818	-1.7806	-1.7818	-1.7817	0.6718	1.4407	1.4407	1.4407	1.4407	1.3961	1.4407	-10.689	1.4407	1.4407	0.9089	1.4407	1.4407	0.7841	1.4407	1.4407	1.3655	1.3658	1.3658	1.3658	1.3656	1.3659	1.3656	1.3656	1.3656	1.3656	1.3656	1.3656	1.3656	1.3656	1.3658
gthox[c][e][m][r]	-0.0992	-0.5236	-0.5217	-0.5217	-0.5217	-0.5217	-0.5217	-0.5217	-0.5217	-0.5217	-0.5217	-0.5216	-0.5217	-0.5216	-0.5217	-0.5215	-0.5217	-0.5217	0.842	0.6257	0.6257	0.6257	0.6257	0.6685	0.6257	0.3857	0.6257	0.6257	0.7657	0.6257	0.6257	0.8309	0.6257	0.6257	0.541	0.541	0.541	0.541	0.5408	0.541	0.5409	0.5408	0.5409	0.5409	0.5409	0.5409	0.5409	0.5409	0.541
gthrd[c][e][m][r]	-0.1238	-0.0714	-0.0714	-0.0714	-0.0714	-0.0714	-0.0714	-0.0714	-0.0714	-0.0714	-0.0714	-0.0714	-0.0714	-0.0714	-0.0714	-0.0714	-0.0714	-0.0714	1.1266	0.6659	0.6659	0.6659	0.6659	0.711	0.6659	-0.1761	0.6659	0.6659	0.9103	0.6659	0.6659	1.0659	0.6659	0.6659	0.6148	0.6148	0.6148	0.6148	0.6147	0.6148	0.6147	0.6147	0.6147	0.6147	0.6147	0.6147	0.6147	0.6147	0.6148
gtp[c][e][m][n]	-2.1958	-0.3651	-0.365	-0.365	-0.365	-0.365	-0.365	-0.365	-0.365	-0.365	-0.365	-0.365	-0.365	-0.365	-0.365	-0.365	-0.365	-0.365	0.9001	0.5494	0.5494	0.5494	0.5494	0.5824	0.5494	-0.8673	0.5494	0.5494	0.7938	0.5494	0.5494	0.8672	0.5494	0.5494	0.4511	0.4511	0.4511	0.4511	0.4511	0.4511	0.4511	0.4511	0.4511	0.4511	0.4511	0.4511	0.4511	0.4511	0.4511
gua[c][e]	-0.2352	-1.7788	-1.7834	-1.7834	-1.7834	-1.7834	-1.7834	-1.7834	-1.7834	-1.7834	-1.7834	-1.7833	-1.7834	-1.7833	-1.7834	-1.7832	-1.7834	-1.7833	0.6714	1.4409	1.4409	1.4409	1.4409	1.3963	1.4409	-12.2738	1.4409	1.4409	0.909	1.4409	1.4409	0.7842	1.4409	1.4409	1.3656	1.3658	1.3658	1.3658	1.3658	1.3659	1.3658	1.3658	1.3658	1.3658	1.3658	1.3658	1.3658	1.3658	1.3658
gudac[c][e]	-10.9921	-1.5086	-1.5284	-1.5284	-1.5284	-1.5284	-1.5284	-1.5284	-1.5284	-1.5284	-1.5284	-1.5283	-1.5284	-1.5283	-1.5284	-1.5279	-1.5284	-1.5284	0.1886	1.3574	1.3574	1.3574	1.3574	1.2504	1.3574	-10.775	1.3574	1.3574	0.5718	1.3574	1.3574	0.275	1.3574	1.3574	1.3697	1.3694	1.3694	1.3694	1.3693	1.3694	1.3693	1.3693	1.3693	1.3693	1.3693	1.3693	1.3693	1.3693	1.3694
gudca3s[c][e]	-0.1492	0.3533	0.3169	0.3169	0.3169	0.3313	0.3313	0.3416	0.3317	0.3173	0.3173	0.4849	0.2906	0.4501	0.3169	0.9052	0.2944	0.3486	1.5384	0.548	0.548	0.548	0.5014	0.4809	0.5102	0.0683	0.503	0.503	0.4347	0.5788	0.5685	0.4872	0.535	0.5144	1.2078	1.1949	1.1949	1.1949	0.4119	1.4501	0.5147	0.4119	0.4935	0.4935	0.6625	0.5509	0.5541	0.4409	1.2172
guln[c][r]	0.8757	0.5333	0.5263	0.5263	0.5263	0.5263	0.5263	0.5263	0.5263	0.5263	0.5263	0.5264	0.5263	0.5263	0.5263	0.5264	0.5263	0.5263	1.8246	-0.0438	-0.0438	-0.0438	-0.0438	0.213	-0.0438	0.7547	-0.0438	-0.0438	1.2301	-0.0438	-0.0438	1.6685	-0.0438	-0.0438	-0.6571	-0.6639	-0.6639	-0.6639	-0.6642	-0.6638	-0.6641	-0.6642	-0.6642	-0.6642	-0.6641	-0.6641	-0.6641	-0.6642	-0.6639
h[c][e][g][i][l][m][n][r][x]	-0.4161	-0.5049	-0.5048	-0.5048	-0.5048	-0.5048	-0.5048	-0.5048	-0.5048	-0.5048	-0.5048	-0.5047	-0.5048	-0.5047	-0.5048	-0.5047	-0.5048	-0.5048	0.3224	-0.0346	-0.0346	-0.0346	-0.0346	-0.011	-0.0346	-0.6052	-0.0346	-0.0346	0.1656	-0.0346	-0.0346	0.2726	-0.0346	-0.0346	-0.1533	-0.1534	-0.1534	-0.1534	-0.1534	-0.1533	-0.1534	-0.1534	-0.1534	-0.1534	-0.1534	-0.1534	-0.1534	-0.1534	-0.1534
h2o[c][e][g][l][m][n][r][x]	-0.1305	-0.1835	-0.1838	-0.1838	-0.1838	-0.1838	-0.1838	-0.1838	-0.1838	-0.1838	-0.1838	-0.1838	-0.1838	-0.1838	-0.1838	-0.1836	-0.1838	-0.1838	0.4832	-0.0446	-0.0446	-0.0446	-0.0446	-0.0059	-0.0446	-0.0997	-0.0446	-0.0446	0.265	-0.0446	-0.0446	0.4146	-0.0446	-0.0446	-0.1036	-0.1036	-0.1036	-0.1036	-0.1039	-0.1035	-0.1039	-0.1039	-0.1039	-0.1039	-0.1038	-0.1039	-0.1039	-0.1039	-0.1036
h2o2[c][e][l][m][n][r][x]	-0.2039	0.431	0.4308	0.4308	0.4308	0.4308	0.4308	0.4308	0.4308	0.4308	0.4308	0.4309	0.4308	0.4309	0.4308	0.4309	0.4308	0.4308	0.0132	-0.0006	-0.0006	-0.0006	-0.0006	0.0006	-0.0006	0.3234	-0.0006	-0.0006	0.007	-0.0006	-0.0006	0.0112	-0.0006	-0.0006	-0.0012	-0.0012	-0.0012	-0.0012	-0.0013	-0.0011	-0.0013	-0.0013	-0.0013	-0.0013	-0.0013	-0.0013	-0.0013	-0.0013	-0.0012
HC00250[c][e]	-0.7337	13.7718	13.7725	13.7725	13.7725	13.7725	13.7725	13.7725	13.7725	13.7725	13.7725	13.7725	13.7725	13.7725	13.7725	13.7725	13.7725	13.7725	1.54	5.0098	5.0098	5.0098	5.0084	0.4827	5.0087	13.1673	5.0085	5.0085	0.4363	5.0108	5.0104	0.4886	5.0094	5.0088	11.2988	11.2988	11.2988	11.2988	11.2984	11.2989	11.2984	11.2984	11.2984	11.2984	11.2985	11.2985	11.2985	11.2984	11.2988
HC00319[c][m]	-0.0013	-0.0252	-0.0251	-0.0251	-0.0251	-0.0251	-0.0251	-0.0251	-0.0251	-0.0251	-0.0251	-0.0251	-0.0251	-0.0251	-0.0251	-0.0251	-0.0251	-0.0251	0.9923	0.4668	0.4668	0.4668	0.4668	0.4995	0.4668	-0.5236	0.4668	0.4668	0.7144	0.4668	0.4668	0.9094	0.4668	0.4668	0.4441	0.4441	0.4441	0.4441	0.4441	0.4441	0.4441	0.4441	0.4441	0.4441	0.4441	0.4441	0.4441	0.4441	0.4441
HC00342[c][e][m]	0.0019	-0.2315	-0.2317	-0.2317	-0.2317	-0.2317	-0.2317	-0.2317	-0.2317	-0.2317	-0.2317	-0.2317	-0.2317	-0.2317	-0.2317	-0.2317	-0.2317	-0.2317	1.5977	0.8128	0.8128	0.8128	0.8128	0.8798	0.8128	-0.8429	0.8128	0.8128	1.2451	0.8128	0.8128	1.4994	0.8128	0.8128	0.7383	0.7383	0.7383	0.7383	0.7382	0.7383	0.7382	0.7382	0.7382	0.7382	0.7383	0.7383	0.7383	0.7382	0.7383
HC00361[c]	-0.1879	-0.156	-0.156	-0.156	-0.156	-0.156	-0.156	-0.156	-0.156	-0.156	-0.156	-0.156	-0.156	-0.156	-0.156	-0.156	-0.156	-0.156	4.6841	2.6222	2.6222	2.6222	2.6222	2.972	2.6222	-0.156	2.6222	2.6222	4.1094	2.6222	2.6222	4.5269	2.6222	2.6222	1.2187	1.2186	1.2186	1.2186	1.2186	1.2186	1.2186	1.2186	1.2186	1.2186	1.2186	1.2186	1.2186	1.2186	1.2186
HC00591[c][m]	-1.8183	-0.4053	-0.4043	-0.4043	-0.4043	-0.4043	-0.4043	-0.4043	-0.4043	-0.4043	-0.4043	-0.4043	-0.4043	-0.4043	-0.4043	-0.4043	-0.4043	-0.4043	-1.7871	-1.4808	-1.4808	-1.4808	-1.4808	-1.6952	-1.4808	-0.7043	-1.4808	-1.4808	-1.7871	-1.4808	-1.4808	-1.7871	-1.4808	-1.4808	-1.6003	-1.6003	-1.6003	-1.6003	-1.6003	-1.6003	-1.6003	-1.6003	-1.6003	-1.6003	-1.6003	-1.6003	-1.6003	-1.6003	-1.6003
HC00664[c]	2.8348	1.0815	1.0816	1.0816	1.0816	1.0816	1.0816	1.0816	1.0816	1.0816	1.0816	1.0818	1.0816	1.0818	1.0816	1.0826	1.0816	1.0817	3.4777	2.9643	2.9643	2.9643	2.9643	2.9476	2.9643	1.8049	2.9643	2.9643	3.0266	2.9644	2.9644	3.3112	2.9643	2.9643	3.1556	3.1556	3.1556	3.1556	3.1553	3.1558	3.1553	3.1553	3.1553	3.1553	3.1554	3.1553	3.1553	3.1553	3.1556
HC00682[m]	0	0	0	0	0	0	0	0	0	0	0	0	0	0	0	0	0	0	0	0	0	0	0	0	0	0	0	0	0	0	0	0	0	0	15.6097	15.6097	15.6097	15.6097	0	16.2877	0	0	0	0	0	14.2878	14.2878	0	15.6097
HC00718[c]	0.9917	0.8454	0.845	0.845	0.845	0.845	0.845	0.845	0.845	0.845	0.845	0.845	0.845	0.845	0.845	0.845	0.845	0.845	1.3991	0.1886	0.1886	0.1886	0.1886	0.3328	0.1886	1.5736	0.1886	0.1886	0.972	0.1886	0.1886	1.2774	0.1886	0.1886	0.0322	0.0323	0.0323	0.0323	0.0323	0.0323	0.0323	0.0323	0.0323	0.0323	0.0323	0.0323	0.0323	0.0323	0.0323
HC00900[c][e][m]	2.2034	3.411	3.4116	3.4116	3.4116	3.4116	3.4116	3.4116	3.4116	3.4116	3.4116	3.4116	3.4116	3.4116	3.4116	3.4117	3.4116	3.4116	0.378	0.1099	0.1099	0.1099	0.1098	0.113	0.1098	2.8707	0.1098	0.1098	0.2807	0.1099	0.1099	0.3233	0.1099	0.1098	1.4213	1.4213	1.4213	1.4213	1.421	1.4215	1.421	1.421	1.421	1.421	1.4211	1.4211	1.4211	1.421	1.4213
HC01118[c][r]	1.9402	0.3533	0.3169	0.3168	0.3169	0.3315	-26.5158	0.3418	0.3317	0.3173	0.3173	0.4847	0.2907	0.45	0.3169	0.9052	0.2944	0.3485	1.5383	0.5477	0.5477	0.5477	0.501	-26.5158	0.5101	0.0686	0.5027	0.5027	0.4347	0.5786	0.5683	0.487	0.5346	0.514	1.2078	1.1949	1.1949	1.1949	0.4118	-26.5158	0.5147	0.4118	0.4935	0.4935	0.6623	0.5508	0.5538	0.4408	1.2173
HC01180[c]	2.8377	1.0828	1.0829	1.0829	1.0829	1.0829	1.0829	1.0829	1.0829	1.0829	1.0829	1.0829	1.0829	1.0829	1.0829	1.0829	1.0829	1.0829	3.4801	2.967	2.967	2.967	2.967	2.9503	2.967	1.8072	2.967	2.967	3.0293	2.967	2.967	3.314	2.967	2.967	3.158	3.158	3.158	3.158	3.158	3.158	3.158	3.158	3.158	3.158	3.158	3.158	3.158	3.158	3.158
HC01223[m]	0.0282	0.0539	0.0539	0.0539	0.0539	0.0539	0.0539	0.0539	0.0539	0.0539	0.0539	0.0539	0.0539	0.0539	0.0539	0.0539	0.0539	0.0539	0.0539	0.0539	0.0539	0.0539	0.0539	0.0539	0.0539	0.0539	0.0539	0.0539	0.0539	0.0539	0.0539	0.0539	0.0539	0.0539	0.0539	0.0539	0.0539	0.0539	0.0539	0.0539	0.0539	0.0539	0.0539	0.0539	0.0539	0.0539	0.0539	0.0539	0.0539
HC01405[m][x]	-12.8028	-38.3831	-38.3831	-38.3831	-38.3831	-38.3831	-38.3831	-38.3831	-38.3831	-38.3831	-38.3831	-38.3831	-38.3831	-38.3831	-38.3831	-38.3831	-38.3831	-38.3831	-38.3831	-38.3831	-38.3831	-38.3831	-38.3831	-38.3831	-38.3831	-38.3831	-38.3831	-38.3831	-38.3831	-38.3831	-38.3831	-38.3831	-38.3831	-38.3831	-38.3831	-38.3831	-38.3831	-38.3831	-38.3831	-38.3831	-38.3831	-38.3831	-38.3831	-38.3831	-38.3831	-38.3831	-38.3831	-38.3831	-38.3831
HC01406[m][x]	-12.8028	-38.3831	-38.3831	-38.3831	-38.3831	-38.3831	-38.3831	-38.3831	-38.3831	-38.3831	-38.3831	-38.3831	-38.3831	-38.3831	-38.3831	-38.3831	-38.3831	-38.3831	-38.3831	-38.3831	-38.3831	-38.3831	-38.3831	-38.3831	-38.3831	-38.3831	-38.3831	-38.3831	-38.3831	-38.3831	-38.3831	-38.3831	-38.3831	-38.3831	-38.3831	-38.3831	-38.3831	-38.3831	-38.3831	-38.3831	-38.3831	-38.3831	-38.3831	-38.3831	-38.3831	-38.3831	-38.3831	-38.3831	-38.3831
HC01407[m][x]	-11.8475	-36.3831	-36.3831	-36.3831	-36.3831	-36.3831	-36.3831	-36.3831	-36.3831	-36.3831	-36.3831	-36.3831	-36.3831	-36.3831	-36.3831	-36.3831	-36.3831	-36.3831	-36.3831	-36.3831	-36.3831	-36.3831	-36.3831	-36.3831	-36.3831	-36.3831	-36.3831	-36.3831	-36.3831	-36.3831	-36.3831	-36.3831	-36.3831	-36.3831	-36.3831	-36.3831	-36.3831	-36.3831	-36.3831	-36.3831	-36.3831	-36.3831	-36.3831	-36.3831	-36.3831	-36.3831	-36.3831	-36.3831	-36.3831
HC01408[m][x]	-11.8475	-36.3831	-36.3831	-36.3831	-36.3831	-36.3831	-36.3831	-36.3831	-36.3831	-36.3831	-36.3831	-36.3831	-36.3831	-36.3831	-36.3831	-36.3831	-36.3831	-36.3831	-36.3831	-36.3831	-36.3831	-36.3831	-36.3831	-36.3831	-36.3831	-36.3831	-36.3831	-36.3831	-36.3831	-36.3831	-36.3831	-36.3831	-36.3831	-36.3831	-36.3831	-36.3831	-36.3831	-36.3831	-36.3831	-36.3831	-36.3831	-36.3831	-36.3831	-36.3831	-36.3831	-36.3831	-36.3831	-36.3831	-36.3831
HC01412[m][x]	12.1375	11.6503	11.6458	11.6458	11.6458	11.6458	11.6458	11.6458	11.6458	11.6458	11.6458	11.6458	11.6458	11.6458	11.6458	11.6458	11.6458	11.6458	1.5419	13.111	13.111	13.111	13.111	12.9928	13.111	11.1293	13.111	13.111	0.4381	13.111	13.111	0.4903	13.111	13.111	13.0239	13.0238	13.0238	13.0238	13.0238	13.0238	13.0238	13.0238	13.0238	13.0238	13.0238	13.0238	13.0238	13.0238	13.0238
HC01415[m][x]	-1.3566	-1.8443	-1.8488	-1.8488	-1.8488	-1.8488	-1.8488	-1.8488	-1.8488	-1.8488	-1.8488	-1.8488	-1.8488	-1.8488	-1.8488	-1.8488	-1.8488	-1.8488	-11.9517	-0.3836	-0.3836	-0.3836	-0.3836	-0.5018	-0.3836	-2.3653	-0.3836	-0.3836	-13.0538	-0.3836	-0.3836	-13.003	-0.3836	-0.3836	-0.4707	-0.4708	-0.4708	-0.4708	-0.4708	-0.4708	-0.4708	-0.4708	-0.4708	-0.4708	-0.4708	-0.4708	-0.4708	-0.4708	-0.4708
HC01434[c][m][x]	12.1877	12.3496	12.3676	12.3676	12.3676	12.3676	12.3676	12.3676	12.3676	12.3676	12.3676	12.3676	12.3676	12.3676	12.3676	12.3676	12.3676	12.3676	11.8208	11.6396	11.6396	11.6396	11.6396	11.6811	11.6396	11.5337	11.6396	11.6396	12.0137	11.6396	11.6396	11.81	11.6396	11.6396	11.615	11.6151	11.6151	11.6151	11.6148	11.6152	11.6148	11.6148	11.6148	11.6148	11.6149	11.6148	11.6148	11.6148	11.6151
HC01444[e]	-0.1492	0.3528	0.3165	0.3165	0.3165	0.3313	0.3313	0.3415	0.3313	0.3168	0.3168	0.4848	0.2906	0.4496	0.3165	0.9053	0.2943	0.3485	1.538	0.5476	0.5476	0.5476	0.5009	0.4805	0.5097	0.0683	0.5025	0.5025	0.4342	0.5783	0.568	0.4867	0.5345	0.5139	1.2074	1.1945	1.1945	1.1945	0.4114	1.4496	0.5142	0.4114	0.493	0.493	0.6621	0.5504	0.5536	0.4404	1.217
HC01459[m][x]	-0.1492	0.3533	0.3169	0.3169	0.3169	0.3313	0.3313	0.3416	0.3317	0.3173	0.3173	0.4849	0.2906	0.4501	0.3169	0.9052	0.2944	0.3486	1.5384	0.5477	0.5477	0.5477	0.501	0.4809	0.5102	0.0683	0.503	0.503	0.4347	0.5788	0.5685	0.4872	0.5347	0.5141	1.2078	1.1951	1.1951	1.1951	0.4119	1.4501	0.5147	0.4119	0.4935	0.4935	0.6625	0.5509	0.5541	0.4409	1.2174
HC01496[m]	-0.1492	0.3533	0.317	0.317	0.317	0.3317	0.3316	0.3418	0.3317	0.3173	0.3173	0.4848	0.2908	0.4502	0.317	0.9053	0.2947	0.3488	1.5379	0.5475	0.5475	0.5475	0.5007	0.4805	0.5098	0.0682	0.5025	0.5025	0.4343	0.5782	0.568	0.4867	0.5343	0.5137	1.2082	1.1953	1.1953	1.1953	0.4124	1.4504	0.5151	0.4124	0.494	0.494	0.6624	0.5513	0.5543	0.4413	1.2178
HC01501[c]	-13.2879	26.9595	26.9602	26.9602	26.9602	26.9602	26.9602	26.9602	26.9602	26.9602	26.9602	26.9602	26.9602	26.9602	26.9602	26.9602	26.9602	26.9602	-13.2879	18.1533	18.1533	18.1533	18.1533	-13.2879	18.1533	26.355	18.1533	18.1533	-13.2879	18.1533	18.1533	-13.2879	18.1533	18.1533	24.4857	24.4857	24.4857	24.4857	24.4857	24.4857	24.4857	24.4857	24.4857	24.4857	24.4857	24.4857	24.4857	24.4857	24.4857
HC01609[c][e]	-0.1492	0.3533	0.3169	0.3169	0.3169	0.3315	0.3313	0.3416	0.3317	0.3173	0.3173	0.4849	0.2906	0.4501	0.3169	0.9052	0.2944	0.3486	1.5384	0.548	0.548	0.548	0.5012	0.4809	0.5103	0.0685	0.503	0.503	0.4347	0.5788	0.5685	0.4872	0.535	0.5144	1.2078	1.1949	1.1949	1.1949	0.4119	1.4501	0.5147	0.4119	0.4935	0.4935	0.6625	0.5509	0.5541	0.4409	1.2173
HC01842[c]	0.9917	0.8454	0.845	0.845	0.845	0.845	0.845	0.845	0.845	0.845	0.845	0.845	0.845	0.845	0.845	0.845	0.845	0.845	1.3991	0.1886	0.1886	0.1886	0.1886	0.3328	0.1886	1.5736	0.1886	0.1886	0.972	0.1886	0.1886	1.2774	0.1886	0.1886	0.0322	0.0323	0.0323	0.0323	0.0323	0.0323	0.0323	0.0323	0.0323	0.0323	0.0323	0.0323	0.0323	0.0323	0.0323
HC02023[r]	-35.2224	-0.1952	-0.2008	-0.2008	-0.2008	-0.2008	-0.2008	-0.2008	-0.2008	-0.2008	-0.2008	-0.2008	-0.2008	-0.2008	-0.2008	-0.2008	-0.2008	-0.2008	0.1523	0.4324	0.4324	0.4324	0.4324	0.3493	0.4324	0.1951	0.4324	0.4324	0.1761	0.4324	0.4324	0.1435	0.4324	0.4324	0.4993	0.4995	0.4995	0.4995	0.4995	0.4995	0.4995	0.4995	0.4995	0.4995	0.4995	0.4995	0.4995	0.4995	0.4995
HC02025[r]	0	0	0	0	0	0	0	0	0	0	0	0	0	0	0	0	0	0	0	0	0	0	0	0	0	0	0	0	0	0	0	0	0	0	0	0	0	0	0	0	0	0	0	0	0	0	0	0	0
HC02070[c]	-0.1492	0.3533	0.3173	0.3169	0.3173	0.3317	0.3317	0.342	0.3317	0.3173	0.3173	0.4849	0.291	0.4501	0.3173	0.9055	0.2948	0.3489	1.5382	0.5477	0.5477	0.5477	0.501	0.4806	0.5102	0.0683	0.503	0.503	0.4347	0.5788	0.5685	0.4869	0.5347	0.5141	1.2084	1.1955	1.1955	1.1955	0.4123	1.4506	0.515	0.4123	0.4938	0.4938	0.6628	0.5512	0.5544	0.4412	1.2178
HC02110[c][r]	4.0729	0.3533	0.3169	0.3169	0.3169	0.3315	0.3313	0.3416	0.3317	0.3173	0.3173	0.4849	0.2906	0.4501	0.3169	0.9052	0.2944	0.3486	1.5384	0.548	0.548	0.548	0.5014	0.4809	0.5105	0.0683	0.503	0.503	0.4347	0.5788	0.5685	0.4872	0.535	0.5144	1.2078	1.1949	1.1949	1.1949	0.4119	1.4501	0.5147	0.4119	0.4935	0.4935	0.6625	0.5509	0.5541	0.4409	1.2174
HC02121[c]	-0.1492	0.3533	0.3169	0.3169	0.3169	0.3317	0.3313	0.3416	0.3317	0.3173	0.3173	0.4849	0.2906	0.4501	0.3169	0.9052	0.2944	0.3486	1.5384	0.548	0.548	0.548	0.5014	0.4809	0.5105	0.0688	0.503	0.503	0.4347	0.5788	0.5685	0.4872	0.535	0.5144	1.2078	1.1949	1.1949	1.1949	0.4119	1.4501	0.5147	0.4119	0.4935	0.4935	0.6625	0.5509	0.5541	0.4409	1.2174
HC02136[c]	-0.1492	0.3533	0.3169	0.3169	0.3169	0.3313	0.3313	0.3416	0.3317	0.3173	0.3173	0.4849	0.2906	0.4501	0.3169	0.9052	0.2944	0.3486	1.5384	0.548	0.548	0.548	0.5014	0.4809	0.5102	0.0688	0.503	0.503	0.4347	0.5788	0.5685	0.4872	0.535	0.5144	1.2078	1.1949	1.1949	1.1949	0.4119	1.4501	0.5147	0.4119	0.4935	0.4935	0.6625	0.5509	0.5541	0.4409	1.2172
HC02191[c][e][r]	-0.1492	0.3533	0.3169	0.3169	0.3169	0.3313	0.3313	0.3416	0.3317	0.3173	0.3173	0.4849	0.2906	0.4501	0.3169	0.9052	0.2944	0.3486	1.5384	0.548	0.548	0.548	0.5014	0.4809	0.5102	0.0683	0.503	0.503	0.4347	0.5788	0.5685	0.4872	0.535	0.5144	1.2078	1.1949	1.1949	1.1949	0.4119	1.4501	0.5147	0.4119	0.4935	0.4935	0.6625	0.5509	0.5541	0.4409	1.2174
HC02203[c][m]	-0.2174	-0.3583	-0.3582	-0.3582	-0.3582	-0.3582	-0.3582	-0.3582	-0.3582	-0.3582	-0.3582	-0.3582	-0.3582	-0.3582	-0.3582	-0.3582	-0.3582	-0.3582	0.4834	0.5012	0.5012	0.5012	0.5012	0.524	0.5012	-0.886	0.5012	0.5012	0.5366	0.5012	0.5012	0.5126	0.5012	0.5012	0.4292	0.4292	0.4292	0.4292	0.4292	0.4292	0.4292	0.4292	0.4292	0.4292	0.4292	0.4292	0.4292	0.4292	0.4292
HC02205[c]	-0.2174	-0.3583	-0.3582	-0.3582	-0.3582	-0.3582	-0.3582	-0.3582	-0.3582	-0.3582	-0.3582	-0.3582	-0.3582	-0.3582	-0.3582	-0.3582	-0.3582	-0.3582	0.4834	0.5012	0.5012	0.5012	0.5012	0.524	0.5012	-0.886	0.5012	0.5012	0.5366	0.5012	0.5012	0.5126	0.5012	0.5012	0.4292	0.4292	0.4292	0.4292	0.4292	0.4292	0.4292	0.4292	0.4292	0.4292	0.4292	0.4292	0.4292	0.4292	0.4292
HC02207[c]	-0.2174	-0.3583	-0.3582	-0.3582	-0.3582	-0.3582	-0.3582	-0.3582	-0.3582	-0.3582	-0.3582	-0.3582	-0.3582	-0.3582	-0.3582	-0.3582	-0.3582	-0.3582	0.4834	0.5012	0.5012	0.5012	0.5012	0.524	0.5012	-0.886	0.5012	0.5012	0.5366	0.5012	0.5012	0.5126	0.5012	0.5012	0.4292	0.4292	0.4292	0.4292	0.4292	0.4292	0.4292	0.4292	0.4292	0.4292	0.4292	0.4292	0.4292	0.4292	0.4292
HC02213[c][e]	-0.1492	0.3533	0.3169	0.3169	0.3169	0.3317	0.3313	0.3416	0.3317	0.3173	0.3173	0.4849	0.2906	0.4501	0.3169	0.9052	0.2944	0.3486	1.5384	0.548	0.548	0.548	0.5014	0.4809	0.5102	0.0688	0.503	0.503	0.4347	0.5788	0.5685	0.4872	0.535	0.5144	1.2078	1.1949	1.1949	1.1949	0.4119	1.4501	0.5147	0.4119	0.4935	0.4935	0.6625	0.5509	0.5541	0.4409	1.2174
hca24g[c][e][r]	-0.1492	0.3533	0.3169	0.3169	0.3169	0.3313	0.3313	0.3416	0.3317	0.3173	0.3173	0.4849	0.2906	0.4501	0.3169	0.9052	0.2944	0.3486	1.5384	0.548	0.548	0.548	0.5014	0.4809	0.5105	0.0688	0.503	0.503	0.4347	0.5788	0.5685	0.4872	0.535	0.5144	1.2078	1.1949	1.1949	1.1949	0.4119	1.4501	0.5147	0.4119	0.4935	0.4935	0.6625	0.5509	0.5541	0.4409	1.2174
hca6g[c][e][r]	-0.1492	0.3533	0.3169	0.3169	0.3169	0.3313	0.3313	0.3416	0.3317	0.3173	0.3173	0.4849	0.2906	0.4501	0.3169	0.9052	0.2944	0.3486	1.5384	0.548	0.548	0.548	0.5014	0.4809	0.5105	0.0688	0.503	0.503	0.4347	0.5788	0.5685	0.4872	0.535	0.5144	1.2078	1.1949	1.1949	1.1949	0.4119	1.4501	0.5147	0.4119	0.4935	0.4935	0.6625	0.5509	0.5541	0.4409	1.2174
hco3[c][e][m]	-0.6186	-0.3979	-0.3978	-0.3978	-0.3978	-0.3978	-0.3978	-0.3978	-0.3978	-0.3978	-0.3978	-0.3978	-0.3978	-0.3978	-0.3978	-0.3977	-0.3978	-0.3978	0.5028	0.0027	0.0027	0.0027	0.0027	-0.0172	0.0027	-0.6577	0.0027	0.0027	0.1816	0.0027	0.0027	0.3965	0.0027	0.0027	0.0273	0.0273	0.0273	0.0273	0.0272	0.0274	0.0272	0.0272	0.0272	0.0272	0.0272	0.0272	0.0272	0.0272	0.0273
hcys_L[c]	-0.1492	0.3529	0.3168	0.3168	0.3168	0.3313	0.3313	0.3416	0.3316	0.3169	0.3169	0.4848	0.2906	0.4499	0.3168	0.9051	0.2944	0.3484	1.5383	0.5477	0.5477	0.5477	0.501	0.4808	0.5102	0.0683	0.5029	0.5029	0.4347	0.5787	0.5684	0.4871	0.5347	0.5143	1.2078	1.1949	1.1949	1.1949	0.4119	1.4499	0.5144	0.4119	0.4934	0.4934	0.6625	0.5506	0.5537	0.4408	1.2172
hdca[c][e][l][r][x]	-10.3475	0.4872	0.4892	0.4892	0.4892	0.4892	0.4892	0.4892	0.4892	0.4892	0.4892	0.4893	0.4892	0.4893	0.4892	0.4894	0.4892	0.4892	2.0186	0.6968	0.6968	0.6968	0.6968	0.8611	0.6968	0.6738	0.6968	0.6968	1.5547	0.6969	0.6969	1.8903	0.6968	0.6968	0.5802	0.5804	0.5804	0.5804	0.5802	0.5805	0.5803	0.5802	0.5803	0.5803	0.5803	0.5803	0.5803	0.5802	0.5804
hdca24g[c][e][r]	-0.1492	0.3533	0.3169	0.3169	0.3169	0.3313	0.3313	0.3416	0.3317	0.3173	0.3173	0.4849	0.2906	0.4501	0.3169	0.9052	0.2944	0.3486	1.5384	0.548	0.548	0.548	0.5014	0.4809	0.5105	0.0688	0.503	0.503	0.4347	0.5788	0.5685	0.4872	0.535	0.5144	1.2078	1.1949	1.1949	1.1949	0.4119	1.4501	0.5147	0.4119	0.4935	0.4935	0.6625	0.5509	0.5541	0.4409	1.2174
hdca6g[c][e][r]	-0.1492	0.3533	0.3169	0.3169	0.3169	0.3313	0.3313	0.3416	0.3317	0.3173	0.3173	0.4849	0.2906	0.4501	0.3169	0.9052	0.2944	0.3486	1.5384	0.548	0.548	0.548	0.5014	0.4809	0.5105	0.0688	0.503	0.503	0.4347	0.5788	0.5685	0.4872	0.535	0.5144	1.2078	1.1949	1.1949	1.1949	0.4119	1.4501	0.5147	0.4119	0.4935	0.4935	0.6625	0.5509	0.5541	0.4409	1.2174
hdcea[c][e][l][m][r]	0.1273	0.3537	0.3169	0.3169	0.3169	0.3315	0.3315	0.3418	0.3317	0.3173	0.3173	0.4844	0.291	0.4497	0.317	0.9057	0.2948	0.3487	1.5377	0.5474	0.5474	0.5474	0.5008	0.4804	0.51	0.0684	0.5025	0.5025	0.434	0.5782	0.568	0.4864	0.5344	0.5139	1.2076	1.1951	1.1951	1.1951	0.4115	1.4502	0.5144	0.4115	0.4932	0.4932	0.6625	0.5508	0.5539	0.4405	1.2175
hdcecrn[c][e][m][r]	1.3661	0.4506	0.4528	0.4528	0.4528	0.4528	0.4528	0.4528	0.4528	0.4528	0.4528	0.4528	0.4528	0.4528	0.4528	0.4528	0.4528	0.4528	2.0068	0.6269	0.6269	0.6269	0.6269	0.8052	0.6269	0.6358	0.6269	0.6269	1.5319	0.6269	0.6269	1.8764	0.6269	0.6269	0.498	0.4983	0.4983	0.4983	0.4982	0.4984	0.4982	0.4982	0.4982	0.4982	0.4982	0.4982	0.4982	0.4982	0.4983
hdcoa[c][m][r]	-0.1471	5.6535	5.6196	5.6196	5.6196	5.6196	5.6196	5.6196	5.6196	5.6196	5.6196	5.6196	5.6196	5.6196	5.6196	5.6196	5.6196	5.6196	1.7104	0.9042	0.9042	0.9042	0.8578	0.8391	0.867	6.6189	0.8596	0.8596	0.7992	0.9349	0.9247	0.8532	0.8912	0.8708	1.5318	1.5373	1.5373	1.5373	0.7684	1.7859	0.8704	0.7684	0.8493	0.8493	1.0174	0.9064	0.9094	0.7972	1.559
hdd2coa[c][m][r][x]	10.5502	10.0635	10.059	10.059	10.059	10.059	10.059	10.059	10.059	10.059	10.059	10.0592	10.059	10.0591	10.059	10.0596	10.059	10.059	1.5392	11.5236	11.5236	11.5236	11.5236	11.4054	11.5236	9.5427	11.5236	11.5236	0.4357	11.5236	11.5236	0.488	11.5236	11.5236	11.4368	11.4367	11.4367	11.4367	11.4364	11.4369	11.4364	11.4364	11.4364	11.4364	11.4365	11.4364	11.4364	11.4364	11.4367
hdd2crn[c][e][m]	1.3237	0.3533	0.3168	0.3168	0.3168	0.3316	0.3315	0.3418	0.3316	0.3172	0.3172	0.4842	0.2908	0.45	0.3168	0.9046	0.2946	0.3487	1.6081	0.8308	0.8308	0.8308	0.794	0.7982	0.8011	0.0682	0.7953	0.7953	0.9136	0.8551	0.847	1.0536	0.8204	0.8042	1.3323	1.3681	1.3681	1.3681	0.695	1.6031	0.7769	0.695	0.7599	0.7599	0.8971	0.8061	0.8086	0.718	1.3885
hestratriol[c][l]	-0.1502	0.3514	0.3152	0.3152	0.3152	0.3302	0.33	0.3403	0.3302	0.3158	0.3158	0.4812	0.2895	0.4477	0.3154	0.9026	0.2933	0.3474	1.5386	0.5493	0.5493	0.5493	0.5024	0.4797	0.5115	0.0622	0.5044	0.5044	0.4339	0.5795	0.5694	0.4873	0.5363	0.5158	1.211	1.1982	1.1982	1.1982	0.415	1.4532	0.5179	0.415	0.4967	0.4967	0.6642	0.5539	0.5567	0.444	1.2205
hexc[c][e][r]	-0.1492	0.3533	0.3169	0.3169	0.3169	0.3317	0.3313	0.3416	0.3317	0.3173	0.3173	0.4849	0.2906	0.4501	0.3169	0.9052	0.2944	0.3486	1.5384	0.548	0.548	0.548	0.5014	0.4809	0.5105	0.0683	0.503	0.503	0.4347	0.5788	0.5685	0.4872	0.535	0.5144	1.2078	1.1949	1.1949	1.1949	0.4119	1.4501	0.5147	0.4119	0.4935	0.4935	0.6625	0.5509	0.5541	0.4409	1.2174
hexccoa[c][r][x]	-0.1492	0.3533	0.3169	0.3169	0.3169	0.3317	0.3313	0.342	0.3317	0.3173	0.3173	0.4846	0.2906	0.4501	0.3169	0.9052	0.2944	0.3486	1.5384	0.5477	0.5477	0.5477	0.501	0.4806	0.5102	0.0683	0.503	0.503	0.4347	0.5788	0.5685	0.4869	0.5347	0.5141	1.208	1.1951	1.1951	1.1951	0.4119	1.4502	0.5147	0.4119	0.4935	0.4935	0.6625	0.5509	0.5541	0.4409	1.2174
hexddcoa[m]	29.3112	0	0	0	0	0	0	0	0	0	0	0	0	0	0	0	0	0	0	0	0	0	0	0	0	0	0	0	0	0	0	0	0	0	0	0	0	0	0	0	0	0	0	0	0	0	0	0	0
hexdectecoa[m][x]	0	0	0	0	0	0	0	0	0	0	0	0	0	0	0	0	0	0	0	0	0	0	0	0	0	0	0	0	0	0	0	0	0	0	0	0	0	0	0	0	0	0	0	0	0	0	0	0	0
hexdiac[c][e][r]	-0.1492	0.3533	0.3169	0.3169	0.3169	0.3313	0.3313	0.3416	0.3317	0.3173	0.3173	0.4849	0.2906	0.4501	0.3169	0.9052	0.2944	0.3486	1.5384	0.548	0.548	0.548	0.5012	0.4809	0.5102	0.0683	0.503	0.503	0.4347	0.5788	0.5685	0.4872	0.535	0.5144	1.2078	1.1949	1.1949	1.1949	0.4119	1.4501	0.5147	0.4119	0.4935	0.4935	0.6625	0.5509	0.5541	0.4409	1.2173
hexdicoa[c][r][x]	-0.1492	0.3529	0.3169	0.3169	0.3169	0.3313	0.3313	0.3416	0.3317	0.3173	0.3173	0.4849	0.2906	0.4501	0.3169	0.9052	0.2944	0.3486	1.5384	0.548	0.548	0.548	0.501	0.4809	0.5102	0.0683	0.503	0.503	0.4347	0.5788	0.5685	0.4872	0.5347	0.5144	1.2078	1.1949	1.1949	1.1949	0.4119	1.4499	0.5147	0.4119	0.4935	0.4935	0.6625	0.5509	0.5537	0.4409	1.2172
his_L[c][e]	0.0067	0.5007	0.5028	0.5028	0.5028	0.5028	0.5028	0.5028	0.5028	0.5028	0.5028	0.5029	0.5028	0.5029	0.5028	0.503	0.5028	0.5028	1.7056	0.769	0.769	0.769	0.769	0.8969	0.769	0.1998	0.769	0.769	1.4648	0.769	0.769	1.6307	0.769	0.769	0.7303	0.7304	0.7304	0.7304	0.7302	0.7306	0.7302	0.7302	0.7302	0.7302	0.7302	0.7302	0.7302	0.7302	0.7305
hisargcys[c][e]	-0.1492	0.3533	0.3169	0.3169	0.3169	0.3313	0.3313	0.3416	0.3317	0.3173	0.3173	0.4849	0.2906	0.4501	0.3169	0.9052	0.2944	0.3486	1.5384	0.548	0.548	0.548	0.5014	0.4809	0.5102	0.0683	0.503	0.503	0.4347	0.5788	0.5685	0.4872	0.535	0.5144	1.2078	1.1949	1.1949	1.1949	0.4119	1.4501	0.5147	0.4119	0.4935	0.4935	0.6625	0.5509	0.5537	0.4409	1.2172
hisargser[c][e]	-0.1492	0.3533	0.3169	0.3169	0.3169	0.3317	0.3313	0.3416	0.3317	0.3173	0.3173	0.4849	0.2906	0.4501	0.3169	0.9052	0.2944	0.3486	1.5384	0.548	0.548	0.548	0.5014	0.4809	0.5105	0.0688	0.503	0.503	0.4347	0.5788	0.5685	0.4872	0.535	0.5144	1.2078	1.1949	1.1949	1.1949	0.4119	1.4501	0.5147	0.4119	0.4935	0.4935	0.6625	0.5509	0.5541	0.4409	1.2174
hisasp[c][e]	-0.1492	0.3529	0.3165	0.3165	0.3165	0.3313	0.3313	0.3416	0.3313	0.3169	0.3169	0.4846	0.2906	0.4497	0.3165	0.905	0.2944	0.3486	1.5384	0.548	0.548	0.548	0.5014	0.4809	0.5105	0.0683	0.503	0.503	0.4347	0.5788	0.5685	0.4872	0.535	0.5144	1.2078	1.1949	1.1949	1.1949	0.4119	1.4501	0.5147	0.4119	0.4935	0.4935	0.6622	0.5509	0.5541	0.4409	1.2174
hiscyscys[c][e]	-11.2855	1.3334	1.3362	1.3362	1.3362	1.3362	1.3362	1.3362	1.3362	1.3362	1.3362	1.3362	1.3362	1.3362	1.3362	1.3362	1.3362	1.3362	-9.5978	-10.5879	-10.5879	-10.5879	-10.6346	-10.655	-10.6258	0.7825	-10.633	-10.633	-10.7012	-10.5575	-10.5675	-10.6491	-10.601	-10.6216	-9.9277	-9.9405	-9.9405	-9.9405	-10.7237	-9.6857	-10.6212	-10.7237	-10.6421	-10.6421	-10.474	-10.5857	-10.5835	-10.6947	-9.9183
hisglnala[c][e]	-0.1492	0.3533	0.3169	0.3169	0.3169	0.3317	0.3313	0.3416	0.3317	0.3173	0.3173	0.4849	0.2906	0.4501	0.3169	0.9052	0.2944	0.3486	1.5384	0.548	0.548	0.548	0.5014	0.4809	0.5105	0.0688	0.503	0.503	0.4347	0.5788	0.5685	0.4872	0.535	0.5144	1.2078	1.1949	1.1949	1.1949	0.4119	1.4501	0.5147	0.4119	0.4935	0.4935	0.6625	0.5509	0.5541	0.4409	1.2174
hisglu[c][e]	-0.1492	0.3533	0.3169	0.3169	0.3169	0.3317	0.3313	0.3416	0.3317	0.3173	0.3173	0.4849	0.2906	0.4501	0.3169	0.9052	0.2944	0.3486	1.5384	0.548	0.548	0.548	0.5014	0.4809	0.5105	0.0683	0.503	0.503	0.4347	0.5788	0.5685	0.4872	0.535	0.5144	1.208	1.1951	1.1951	1.1951	0.4119	1.4502	0.5147	0.4119	0.4935	0.4935	0.6625	0.5509	0.5541	0.4409	1.2174
hisglugln[c][e]	-0.1492	0.3533	0.3169	0.3169	0.3169	0.3313	0.3313	0.3416	0.3317	0.3173	0.3173	0.4849	0.2906	0.4501	0.3169	0.9052	0.2944	0.3486	1.5384	0.548	0.548	0.548	0.5014	0.4809	0.5105	0.0688	0.503	0.503	0.4347	0.5788	0.5685	0.4872	0.535	0.5144	1.2078	1.1949	1.1949	1.1949	0.4119	1.4501	0.5147	0.4119	0.4935	0.4935	0.6625	0.5509	0.5541	0.4409	1.2174
hisglylys[c][e]	-10.3139	-9.8125	-9.8489	-9.8489	-9.8489	-9.8341	-9.8345	-9.8242	-9.8341	-9.8485	-9.8485	-9.6811	-9.8752	-9.7157	-9.8489	-9.2607	-9.8714	-9.8172	2.7005	2.6523	2.6523	2.6523	2.6523	2.6588	2.6523	-10.0964	2.6523	2.6523	2.6574	2.6523	2.6523	2.7171	2.6523	2.6523	2.6213	2.6213	2.6213	2.6213	2.6213	2.6213	2.6213	2.6213	2.6213	2.6213	2.6213	2.6213	2.6213	2.6213	2.6213
hishislys[c][e]	-0.1482	0.353	0.3166	0.3166	0.3166	0.3314	0.3311	0.3414	0.3314	0.317	0.317	0.4844	0.2903	0.4498	0.3166	0.9049	0.2941	0.3483	10.896	0.5472	0.5472	0.5472	0.5005	0.4797	0.5097	0.0688	0.5025	0.5025	0.4311	0.5786	0.5683	9.7929	0.5342	0.5136	1.2077	1.1948	1.1948	1.1948	0.4117	1.4498	0.5142	0.4117	0.493	0.493	0.6621	0.5504	0.5533	0.4403	1.2171
hislysala[c][e]	1.0255	0.969	0.9693	0.9693	0.9693	0.9693	0.9693	0.9693	0.9693	0.9693	0.9693	0.9693	0.9693	0.9693	0.9693	0.9693	0.9693	0.9693	-9.3969	-10.3873	-10.3873	-10.3873	-10.434	-10.4545	-10.4249	1.3094	-10.4324	-10.4324	-10.5007	-10.3566	-10.3669	-10.4482	-10.4004	-10.421	-9.7275	-9.7404	-9.7404	-9.7404	-10.5235	-9.4853	-10.4207	-10.5235	-10.4419	-10.4419	-10.2728	-10.3845	-10.3813	-10.4945	-9.718
hislysglu[c][e]	-0.1492	0.3533	0.3169	0.3169	0.3169	0.3317	0.3313	0.3416	0.3317	0.3173	0.3173	0.4849	0.2906	0.4501	0.3169	0.9052	0.2944	0.3486	1.5384	0.548	0.548	0.548	0.5014	0.4809	0.5105	0.0688	0.503	0.503	0.4347	0.5788	0.5685	0.4872	0.535	0.5144	1.2078	1.1949	1.1949	1.1949	0.4119	1.4501	0.5147	0.4119	0.4935	0.4935	0.6625	0.5509	0.5541	0.4409	1.2174
hislysile[c][e]	0.6297	0.6199	0.6226	0.6226	0.6226	0.6226	0.6226	0.6226	0.6226	0.6226	0.6226	0.6226	0.6226	0.6226	0.6226	0.6226	0.6226	0.6226	1.596	0.8019	0.8019	0.8019	0.8019	1.0503	0.8019	-2.7313	0.8019	0.8019	1.5529	0.8019	0.8019	1.6125	0.8019	0.8019	0.759	0.7589	0.7589	0.7589	0.7589	0.7589	0.7589	0.7589	0.7589	0.7589	0.7589	0.7589	0.7589	0.7589	0.7589
hislysthr[c][e]	-0.1469	0.3544	0.318	0.318	0.318	0.3328	0.3328	0.3431	0.3328	0.3184	0.3184	0.4861	0.2917	0.4512	0.318	0.9063	0.2955	0.35	1.5404	0.5467	0.5467	0.5467	0.4999	0.4814	0.5091	0.0697	0.5019	0.5019	0.4366	0.5772	0.5669	0.4891	0.5337	0.513	1.2085	1.1956	1.1956	1.1956	0.412	1.4504	0.5149	0.412	0.4937	0.4937	0.6635	0.5518	0.555	0.441	1.2179
hislysval[c][e]	-0.1492	0.3533	0.3169	0.3169	0.3169	0.3317	0.3313	0.3416	0.3317	0.3173	0.3173	0.4849	0.2906	0.4501	0.3169	0.9052	0.2944	0.3486	1.5384	0.548	0.548	0.548	0.5014	0.4809	0.5105	0.0683	0.503	0.503	0.4347	0.5788	0.5685	0.4872	0.535	0.5144	1.2078	1.1949	1.1949	1.1949	0.4119	1.4501	0.5147	0.4119	0.4935	0.4935	0.6625	0.5509	0.5541	0.4409	1.2174
hismet[c][e]	-0.1473	0.3462	0.3096	0.3096	0.3096	0.3242	0.3242	0.3345	0.3245	0.31	0.31	0.4759	0.2836	0.4411	0.3096	0.8982	0.2874	0.3415	1.5386	0.5483	0.5483	0.5483	0.5016	0.4815	0.5108	9.37	0.5036	0.5036	0.4346	0.5794	0.5691	0.4875	0.5353	0.5147	1.2084	1.1955	1.1955	1.1955	0.4121	1.4505	0.515	0.4121	0.4941	0.4941	0.6632	0.5512	0.5544	0.4411	1.2177
hismetgln[c][e]	-0.1492	0.3533	0.3169	0.3169	0.3169	0.3313	0.3313	0.3416	0.3317	0.3173	0.3173	0.4849	0.2906	0.4501	0.3169	0.9052	0.2944	0.3486	1.5384	0.548	0.548	0.548	0.5014	0.4809	0.5105	0.0688	0.503	0.503	0.4347	0.5788	0.5685	0.4872	0.535	0.5144	1.2078	1.1949	1.1949	1.1949	0.4119	1.4501	0.5147	0.4119	0.4935	0.4935	0.6625	0.5509	0.5541	0.4409	1.2174
hisphearg[c][e]	-0.1492	0.3529	0.3169	0.3169	0.3169	0.3313	0.3313	0.3416	0.3317	0.3173	0.3173	0.4846	0.2906	0.4501	0.3169	0.9052	0.2944	0.3486	1.5385	0.5477	0.5477	0.5477	0.501	0.4809	0.5102	0.0683	0.503	0.503	0.4351	0.5788	0.5685	0.4872	0.5347	0.5141	1.2076	1.1947	1.1947	1.1947	0.4116	1.4499	0.5144	0.4116	0.4931	0.4931	0.6622	0.5506	0.5537	0.4405	1.217
hisprolys[c][e]	-0.1483	0.3535	0.3171	0.3171	0.3171	0.3319	0.3319	0.3422	0.3319	0.3175	0.3175	0.4852	0.2912	0.4503	0.3171	0.9054	0.295	0.3491	1.5393	0.5483	0.5483	0.5483	0.5016	0.4812	0.5108	0.0692	0.5033	0.5033	0.4353	0.5794	0.5691	0.4881	0.5353	0.5147	1.2084	1.1955	1.1955	1.1955	0.4125	1.4505	0.515	0.4125	0.4937	0.4937	0.6629	0.5512	0.5544	0.4411	1.2177
hista[c][e]	-0.1492	0.3533	0.3169	0.3169	0.3169	0.3317	0.3313	0.3416	0.3317	0.3173	0.3173	0.4849	0.2906	0.4501	0.3169	0.9052	0.2944	0.3486	1.5384	0.548	0.548	0.548	0.5014	0.4809	0.5105	0.0688	0.503	0.503	0.4347	0.5788	0.5685	0.4872	0.535	0.5144	1.2078	1.1949	1.1949	1.1949	0.4119	1.4501	0.5147	0.4119	0.4935	0.4935	0.6625	0.5509	0.5541	0.4409	1.2174
histrphis[c][e]	-6.8671	3.2047	3.2085	3.2085	3.2085	3.2085	3.2085	3.2085	3.2085	3.2085	3.2085	3.2085	3.2085	3.2085	3.2085	3.2085	3.2085	3.2085	6.922	-6.1767	-6.1767	-6.1767	-6.2236	3.2544	-6.2144	-6.6536	-6.2219	-6.2219	6.5847	-6.1464	-6.1568	6.8366	-6.1898	-6.2105	-5.5138	-5.5265	-5.5265	-5.5265	-6.3103	-5.2719	-6.2076	-6.3103	-6.2285	-6.2285	-6.0582	-6.1706	-6.1675	-6.2816	-5.5042
hLkynr[c]	-0.1489	0.3532	0.3167	0.3167	0.3167	0.3314	0.3314	0.3417	0.3317	0.3172	0.3172	0.4848	0.2907	0.45	0.3167	0.9053	0.2944	0.3485	1.5383	0.5474	0.5474	0.5474	0.5006	0.4808	0.51	0.0687	0.5024	0.5024	0.4346	0.5783	0.568	0.487	0.5345	0.5139	1.2076	1.1947	1.1947	1.1947	0.4117	1.4497	0.5144	0.4117	0.4932	0.4932	0.6622	0.5505	0.5536	0.4405	1.2171
hmbil[c]	-0.1492	0.3533	0.3169	0.3169	0.3169	0.3313	0.3313	0.3416	0.3317	0.3173	0.3173	0.4849	0.2906	0.4501	0.3169	0.9052	0.2944	0.3486	1.5384	0.548	0.548	0.548	0.501	0.4809	0.5102	0.0683	0.503	0.503	0.4347	0.5788	0.5685	0.4872	0.535	0.5144	1.2078	1.1949	1.1949	1.1949	0.4119	1.4501	0.5147	0.4119	0.4935	0.4935	0.6625	0.5509	0.5541	0.4409	1.2172
hmcr[c][e]	-0.1492	0.3533	0.3169	0.3169	0.3169	0.3313	0.3313	0.3416	0.3317	0.3173	0.3173	0.4849	0.2906	0.4501	0.3169	0.9052	0.2944	0.3486	1.5384	0.548	0.548	0.548	0.5014	0.4809	0.5105	0.0683	0.503	0.503	0.4347	0.5788	0.5685	0.4872	0.535	0.5144	1.2078	1.1949	1.1949	1.1949	0.4119	1.4501	0.5147	0.4119	0.4935	0.4935	0.6625	0.5509	0.5541	0.4409	1.2172
hmgcoa[c][m][x]	-3.23	-12.686	-3.1951	-3.1951	-3.1951	-3.1951	-3.1951	-3.1951	-3.1951	-3.1951	-3.1951	-3.1949	-3.1951	-3.195	-3.1951	-3.1944	-3.1951	-3.195	-11.4973	-4.8715	-4.8715	-4.8715	-4.8716	-4.5076	-4.8716	-3.8361	-4.8716	-4.8716	-3.1682	-4.8714	-4.8714	-2.5959	-4.8715	-4.8716	-11.8314	-4.8751	-4.8751	-4.8751	-4.8784	-4.8736	-4.878	-4.8784	-4.8781	-4.8781	-4.8775	-4.8779	-4.8779	-4.8783	-4.875
hom_L[c][e]	0.7325	0.225	0.2258	0.2258	0.2258	0.2258	0.2258	0.2258	0.2258	0.2258	0.2258	0.2258	0.2258	0.2258	0.2258	0.2258	0.2258	0.2258	0.9373	0.4575	0.4575	0.4575	0.4575	0.4973	0.4575	0.1062	0.4575	0.4575	0.684	0.4575	0.4575	0.8281	0.4575	0.4575	0.4429	0.4429	0.4429	0.4429	0.4429	0.4429	0.4429	0.4429	0.4429	0.4429	0.4429	0.4429	0.4429	0.4429	0.4429
hpdca[c][e][r]	-0.1492	0.3533	0.3169	0.3169	0.3169	0.3317	0.3313	0.3416	0.3317	0.3173	0.3173	0.4849	0.2906	0.4501	0.3169	0.9052	0.2944	0.3486	1.5384	0.548	0.548	0.548	0.5014	0.4809	0.5102	0.0683	0.503	0.503	0.4347	0.5788	0.5685	0.4872	0.535	0.5144	1.2078	1.1949	1.1949	1.1949	0.4119	1.4501	0.5147	0.4119	0.4935	0.4935	0.6625	0.5509	0.5541	0.4409	1.2174
hpdcacrn[c][m]	2.5132	0.354	0.3173	0.3173	0.3173	0.3321	0.3321	0.3424	0.3321	0.3177	0.3177	0.4834	0.2914	0.4504	0.3173	0.904	0.2951	0.3493	1.7381	1.2707	1.2707	1.2707	1.2459	1.279	1.2507	0.0675	1.2469	1.2469	1.5606	1.2874	1.2819	1.7763	1.2638	1.2528	1.5537	1.6628	1.6628	1.6628	1.1356	1.8683	1.1917	1.1356	1.1799	1.1799	1.2764	1.2121	1.2139	1.1511	1.6804
hpyr[c][m][x]	0.7998	0.6338	0.635	0.635	0.635	0.635	0.635	0.635	0.635	0.635	0.635	0.635	0.635	0.635	0.635	0.635	0.635	0.635	1.0813	-0.5403	-0.5403	-0.5403	-0.5403	-0.3375	-0.5403	1.3036	-0.5403	-0.5403	0.5005	-0.5403	-0.5403	0.9139	-0.5403	-0.5403	-0.8277	-0.8266	-0.8266	-0.8266	-0.8267	-0.8266	-0.8267	-0.8267	-0.8267	-0.8267	-0.8267	-0.8267	-0.8267	-0.8267	-0.8266
hs[l]	-0.1492	0.3533	0.3169	0.3169	0.3169	0.3317	0.3313	0.3416	0.3317	0.3173	0.3173	0.4849	0.2906	0.4501	0.3169	0.9052	0.2944	0.3486	1.5384	0.548	0.548	0.548	0.5014	0.4809	0.5105	0.0688	0.503	0.503	0.4347	0.5788	0.5685	0.4872	0.535	0.5144	1.2078	1.1949	1.1949	1.1949	0.4119	1.4501	0.5147	0.4119	0.4935	0.4935	0.6625	0.5509	0.5541	0.4409	1.2174
hs_deg1[l]	-0.1492	0.3533	0.3169	0.3169	0.3169	0.3317	0.3313	0.3416	0.3317	0.3173	0.3173	0.4849	0.2906	0.4501	0.3169	0.9052	0.2944	0.3486	1.5384	0.548	0.548	0.548	0.5014	0.4809	0.5105	0.0688	0.503	0.503	0.4347	0.5788	0.5685	0.4872	0.535	0.5144	1.2078	1.1949	1.1949	1.1949	0.4119	1.4501	0.5147	0.4119	0.4935	0.4935	0.6625	0.5509	0.5541	0.4409	1.2174
hs_deg10[l]	-0.1492	0.3533	0.3169	0.3169	0.3169	0.3317	0.3313	0.3416	0.3317	0.3173	0.3173	0.4849	0.2906	0.4501	0.3169	0.9052	0.2944	0.3486	1.5384	0.548	0.548	0.548	0.5014	0.4809	0.5105	0.0688	0.503	0.503	0.4347	0.5788	0.5685	0.4872	0.535	0.5144	1.2078	1.1949	1.1949	1.1949	0.4119	1.4501	0.5147	0.4119	0.4935	0.4935	0.6625	0.5509	0.5541	0.4409	1.2174
hs_deg11[l]	-0.1492	0.3533	0.3169	0.3169	0.3169	0.3317	0.3313	0.3416	0.3317	0.3173	0.3173	0.4849	0.2906	0.4501	0.3169	0.9052	0.2944	0.3486	1.5384	0.548	0.548	0.548	0.5014	0.4809	0.5105	0.0688	0.503	0.503	0.4347	0.5788	0.5685	0.4872	0.535	0.5144	1.2078	1.1949	1.1949	1.1949	0.4119	1.4501	0.5147	0.4119	0.4935	0.4935	0.6625	0.5509	0.5541	0.4409	1.2174
hs_deg12[l]	-0.1492	0.3533	0.3169	0.3169	0.3169	0.3317	0.3313	0.3416	0.3317	0.3173	0.3173	0.4849	0.2906	0.4501	0.3169	0.9052	0.2944	0.3486	1.5384	0.548	0.548	0.548	0.5014	0.4809	0.5105	0.0688	0.503	0.503	0.4347	0.5788	0.5685	0.4872	0.535	0.5144	1.2078	1.1949	1.1949	1.1949	0.4119	1.4501	0.5147	0.4119	0.4935	0.4935	0.6625	0.5509	0.5541	0.4409	1.2174
hs_deg17[l]	-0.1492	0.3533	0.3169	0.3169	0.3169	0.3317	0.3313	0.3416	0.3317	0.3173	0.3173	0.4849	0.2906	0.4501	0.3169	0.9052	0.2944	0.3486	1.5384	0.548	0.548	0.548	0.5014	0.4809	0.5105	0.0688	0.503	0.503	0.4347	0.5788	0.5685	0.4872	0.535	0.5144	1.2078	1.1949	1.1949	1.1949	0.4119	1.4501	0.5147	0.4119	0.4935	0.4935	0.6625	0.5509	0.5541	0.4409	1.2174
hs_deg18[l]	-0.1492	0.3533	0.3169	0.3169	0.3169	0.3317	0.3313	0.3416	0.3317	0.3173	0.3173	0.4849	0.2906	0.4501	0.3169	0.9052	0.2944	0.3486	1.5384	0.548	0.548	0.548	0.5014	0.4809	0.5105	0.0688	0.503	0.503	0.4347	0.5788	0.5685	0.4872	0.535	0.5144	1.2078	1.1949	1.1949	1.1949	0.4119	1.4501	0.5147	0.4119	0.4935	0.4935	0.6625	0.5509	0.5541	0.4409	1.2174
hs_deg23[l]	-0.1492	0.3533	0.3169	0.3169	0.3169	0.3317	0.3313	0.3416	0.3317	0.3173	0.3173	0.4849	0.2906	0.4501	0.3169	0.9052	0.2944	0.3486	1.5384	0.548	0.548	0.548	0.5014	0.4809	0.5105	0.0688	0.503	0.503	0.4347	0.5788	0.5685	0.4872	0.535	0.5144	1.2078	1.1949	1.1949	1.1949	0.4119	1.4501	0.5147	0.4119	0.4935	0.4935	0.6625	0.5509	0.5541	0.4409	1.2174
hs_deg24[l]	-0.1492	0.3533	0.3169	0.3169	0.3169	0.3317	0.3313	0.3416	0.3317	0.3173	0.3173	0.4849	0.2906	0.4501	0.3169	0.9052	0.2944	0.3486	1.5384	0.548	0.548	0.548	0.5014	0.4809	0.5105	0.0688	0.503	0.503	0.4347	0.5788	0.5685	0.4872	0.535	0.5144	1.2078	1.1949	1.1949	1.1949	0.4119	1.4501	0.5147	0.4119	0.4935	0.4935	0.6625	0.5509	0.5541	0.4409	1.2174
hs_deg5[l]	-0.1492	0.3533	0.3169	0.3169	0.3169	0.3317	0.3313	0.3416	0.3317	0.3173	0.3173	0.4849	0.2906	0.4501	0.3169	0.9052	0.2944	0.3486	1.5384	0.548	0.548	0.548	0.5014	0.4809	0.5105	0.0688	0.503	0.503	0.4347	0.5788	0.5685	0.4872	0.535	0.5144	1.2078	1.1949	1.1949	1.1949	0.4119	1.4501	0.5147	0.4119	0.4935	0.4935	0.6625	0.5509	0.5541	0.4409	1.2174
hs_deg6[l]	-0.1492	0.3533	0.3169	0.3169	0.3169	0.3317	0.3313	0.3416	0.3317	0.3173	0.3173	0.4849	0.2906	0.4501	0.3169	0.9052	0.2944	0.3486	1.5384	0.548	0.548	0.548	0.5014	0.4809	0.5105	0.0688	0.503	0.503	0.4347	0.5788	0.5685	0.4872	0.535	0.5144	1.2078	1.1949	1.1949	1.1949	0.4119	1.4501	0.5147	0.4119	0.4935	0.4935	0.6625	0.5509	0.5541	0.4409	1.2174
hx2coa[m][x]	-1.3562	-1.8443	-1.8488	-1.8488	-1.8488	-1.8488	-1.8488	-1.8488	-1.8488	-1.8488	-1.8488	-1.8488	-1.8488	-1.8488	-1.8488	-1.8488	-1.8488	-1.8488	-11.9535	-0.3836	-0.3836	-0.3836	-0.3836	-0.5018	-0.3836	-2.3653	-0.3836	-0.3836	-13.0569	-0.3836	-0.3836	-13.0053	-0.3836	-0.3836	-0.4707	-0.4708	-0.4708	-0.4708	-0.4708	-0.4708	-0.4708	-0.4708	-0.4708	-0.4708	-0.4708	-0.4708	-0.4708	-0.4708	-0.4708
hxa[c][e][x]	-1.4032	1.1347	0.8583	0.8583	0.8583	0.8583	0.8583	0.8584	0.8583	0.8583	0.8583	0.8586	0.8583	0.8585	0.8583	0.8593	0.8583	0.8584	-0.7663	2.6443	2.6443	2.6443	2.6443	2.5337	2.6443	0.8959	2.6443	2.6443	1.6024	2.6443	2.6443	-1.1991	2.6443	2.6443	2.4398	2.426	2.426	2.426	2.4255	2.4262	2.4256	2.4255	2.4255	2.4255	2.4256	2.4256	2.4256	2.4255	2.426
hxan[c][e]	-0.2203	-1.7786	-1.7831	-1.7831	-1.7831	-1.7831	-1.7831	-1.7831	-1.7831	-1.7831	-1.7831	-1.7831	-1.7831	-1.7831	-1.7831	-1.7828	-1.7831	-1.7831	0.6714	1.4409	1.4409	1.4409	1.4409	1.3963	1.4409	-1.0627	1.4409	1.4409	0.909	1.4409	1.4409	0.7841	1.4409	1.4409	1.3655	1.3658	1.3658	1.3658	1.3658	1.3659	1.3658	1.3658	1.3658	1.3658	1.3658	1.3658	1.3658	1.3658	1.3658
hxcoa[c][e][m][x]	-1.1635	-1.2007	-1.3111	-1.3111	-1.3111	-1.3111	-1.3111	-1.3111	-1.3111	-1.3111	-1.3111	-1.311	-1.3111	-1.311	-1.3111	-1.3107	-1.3111	-1.3111	-4.3734	0.2804	0.2804	0.2804	0.2804	0.1654	0.2804	-1.3689	0.2804	0.2804	-2.011	0.2804	0.2804	-3.9383	0.2804	0.2804	0.1451	0.1395	0.1395	0.1395	0.1393	0.1396	0.1393	0.1393	0.1393	0.1393	0.1394	0.1394	0.1394	0.1393	0.1395
hyochol[c][e][r]	-0.149	0.3531	0.3168	0.3168	0.3168	0.3314	0.3314	0.3417	0.3316	0.3171	0.3171	0.4848	0.2907	0.4501	0.317	0.9052	0.2945	0.3486	1.5385	0.548	0.548	0.548	0.5013	0.4808	0.5102	0.0685	0.5029	0.5029	0.4348	0.5787	0.5686	0.4873	0.5349	0.5143	1.2078	1.1949	1.1949	1.1949	0.4118	1.4499	0.5146	0.4118	0.4934	0.4934	0.6625	0.5508	0.5538	0.4408	1.2172
hyptaur[c]	-0.1469	0.3531	0.3166	0.3166	0.3166	0.3315	0.3315	0.3417	0.3315	0.317	0.317	0.4852	0.2903	0.4503	0.3166	0.9056	0.2941	0.3483	1.5386	0.5459	0.5459	0.5459	0.4991	0.4806	0.5086	14.8707	0.5011	0.5011	0.4339	0.5774	0.5671	0.4869	0.5328	0.5122	1.2069	1.1938	1.1938	1.1938	0.4107	1.449	0.5135	0.4107	0.4925	0.4925	0.661	0.5497	0.5529	0.4398	1.2161
i[c][e]	0.9377	0.1349	0.1354	0.1354	0.1354	0.1354	0.1354	0.1354	0.1354	0.1354	0.1354	0.1355	0.1354	0.1355	0.1354	0.1355	0.1354	0.1354	1.7136	0.852	0.852	0.852	0.852	0.9329	0.852	0.1881	0.852	0.852	1.3394	0.852	0.852	1.6038	0.852	0.852	0.7762	0.7762	0.7762	0.7762	0.7761	0.7762	0.7761	0.7761	0.7761	0.7761	0.7761	0.7761	0.7761	0.7761	0.7762
ibcoa[m]	0.0282	0.0539	0.0539	0.0539	0.0539	0.0539	0.0539	0.0539	0.0539	0.0539	0.0539	0.0539	0.0539	0.0539	0.0539	0.0539	0.0539	0.0539	0.054	0.0539	0.0539	0.0539	0.0539	0.0539	0.0539	0.0539	0.0539	0.0539	0.0539	0.0539	0.0539	0.0539	0.0539	0.0539	0.0539	0.0539	0.0539	0.0539	0.0539	0.054	0.0539	0.0539	0.0539	0.0539	0.0539	0.0539	0.0539	0.0539	0.054
ibup_R[c][e]	-0.1491	0.3532	0.3168	0.3168	0.3168	0.3314	0.3314	0.3419	0.3317	0.3172	0.3172	0.4848	0.2908	0.45	0.3168	0.9051	0.2945	0.3487	1.5384	0.5478	0.5478	0.5478	0.5011	0.4808	0.5102	0.0686	0.5028	0.5028	0.4347	0.5787	0.5684	0.4871	0.5348	0.5142	1.2078	1.1949	1.1949	1.1949	0.412	1.4499	0.5145	0.412	0.4935	0.4935	0.6624	0.5508	0.5539	0.4408	1.2172
ibup_S[c][e]	-0.1491	0.3532	0.3168	0.3168	0.3168	0.3314	0.3314	0.3419	0.3317	0.3172	0.3172	0.4848	0.2908	0.45	0.3168	0.9051	0.2945	0.3487	1.5384	0.5478	0.5478	0.5478	0.5011	0.4808	0.5102	0.0686	0.5028	0.5028	0.4347	0.5787	0.5684	0.4871	0.5348	0.5142	1.2078	1.1949	1.1949	1.1949	0.412	1.4499	0.5145	0.412	0.4935	0.4935	0.6624	0.5508	0.5539	0.4408	1.2172
icdchol[c][e]	-0.1488	0.353	0.3166	0.3166	0.3166	0.3314	0.3314	0.3417	0.3314	0.317	0.317	0.4847	0.2907	0.4502	0.317	0.9052	0.2945	0.3487	1.5385	0.5479	0.5479	0.5479	0.5012	0.4807	0.5103	0.0688	0.5028	0.5028	0.4348	0.5786	0.5687	0.4873	0.5348	0.5142	1.2077	1.1948	1.1948	1.1948	0.4117	1.4498	0.5145	0.4117	0.4933	0.4933	0.6624	0.5507	0.5536	0.4406	1.2171
icit[c][m][x]	0.107	-0.033	-0.0098	-0.0098	-0.0098	-0.0098	-0.0098	-0.0098	-0.0098	-0.0098	-0.0098	-0.0098	-0.0098	-0.0098	-0.0098	-0.0098	-0.0098	-0.0098	1.1096	0.402	0.402	0.402	0.402	0.4607	0.402	-0.5428	0.402	0.402	0.8143	0.402	0.402	1.0198	0.402	0.402	0.3285	0.3285	0.3285	0.3285	0.3285	0.3285	0.3285	0.3285	0.3285	0.3285	0.3285	0.3285	0.3285	0.3285	0.3285
id3acald[c][m]	-0.1492	0.3533	0.3169	0.3169	0.3169	0.3317	0.3313	0.3416	0.3317	0.3173	0.3173	0.4849	0.2906	0.4501	0.3169	0.9052	0.2944	0.3486	1.5384	0.548	0.548	0.548	0.5014	0.4809	0.5105	0.0688	0.503	0.503	0.4347	0.5788	0.5685	0.4872	0.535	0.5144	1.2078	1.1949	1.1949	1.1949	0.4119	1.4501	0.5147	0.4119	0.4935	0.4935	0.6625	0.5509	0.5541	0.4409	1.2174
idour[c][e][l]	-0.1492	0.3533	0.3169	0.3169	0.3169	0.3317	0.3313	0.3416	0.3317	0.3173	0.3173	0.4849	0.2906	0.4501	0.3169	0.9052	0.2944	0.3486	1.5384	0.548	0.548	0.548	0.5014	0.4809	0.5105	0.0688	0.503	0.503	0.4347	0.5788	0.5685	0.4872	0.535	0.5144	1.2078	1.1949	1.1949	1.1949	0.4119	1.4501	0.5147	0.4119	0.4935	0.4935	0.6625	0.5509	0.5541	0.4409	1.2174
idp[c][e][n]	0.4544	-0.2234	-0.2234	-0.2234	-0.2234	-0.2234	-0.2234	-0.2234	-0.2234	-0.2234	-0.2234	-0.2234	-0.2234	-0.2234	-0.2234	-0.2233	-0.2234	-0.2234	-0.8334	-2.0262	-2.0262	-2.0262	-2.0262	-2.1314	-2.0262	-0.2128	-2.0262	-2.0262	-2.195	-2.0262	-2.0262	-1.2054	-2.0262	-2.0262	-2.0301	-2.0301	-2.0301	-2.0301	-2.0303	-2.03	-2.0303	-2.0303	-2.0303	-2.0303	-2.0302	-2.0303	-2.0303	-2.0303	-2.0301
ile_L[c][e][m]	0.7046	0.3374	0.3388	0.3388	0.3388	0.3388	0.3388	0.3388	0.3388	0.3388	0.3388	0.3388	0.3388	0.3388	0.3388	0.339	0.3388	0.3388	1.1241	0.6135	0.6135	0.6135	0.6135	0.6599	0.6135	0.2247	0.6135	0.6135	0.9061	0.6136	0.6136	1.0614	0.6135	0.6135	0.5931	0.593	0.593	0.593	0.5927	0.5932	0.5928	0.5927	0.5928	0.5928	0.5928	0.5928	0.5928	0.5928	0.593
ileargile[c][e]	-0.1474	0.3551	0.3188	0.3188	0.3188	0.3336	0.3332	0.3435	0.3336	0.3191	0.3191	0.4868	0.2925	0.4519	0.3188	0.9071	0.2963	0.3508	1.5402	0.5496	0.5496	0.5496	0.5029	0.4828	0.512	6.6634	0.5048	0.5048	0.4366	0.5806	0.5704	0.4891	0.5365	0.5162	1.2095	1.1968	1.1968	1.1968	0.4138	1.4517	0.5162	0.4138	0.495	0.495	0.6641	0.5524	0.5556	0.4424	1.2191
ileasnhis[c][e]	0.4071	0.2081	0.2103	0.2103	0.2103	0.2103	0.2103	0.2103	0.2103	0.2103	0.2103	0.2103	0.2103	0.2103	0.2103	0.2103	0.2103	0.2103	1.1817	1.0197	1.0197	1.0197	1.0197	1.1112	1.0197	-0.3564	1.0197	1.0197	1.1945	1.0197	1.0197	1.1767	1.0197	1.0197	0.9711	0.9712	0.9712	0.9712	0.9712	0.9712	0.9712	0.9712	0.9712	0.9712	0.9712	0.9712	0.9712	0.9712	0.9712
ileasp[c][e]	-0.1492	0.3529	0.3165	0.3165	0.3165	0.3313	0.3313	0.3416	0.3313	0.3169	0.3169	0.4846	0.2903	0.4497	0.3165	0.905	0.294	0.3486	1.5384	0.548	0.548	0.548	0.501	0.4809	0.5102	0.0683	0.503	0.503	0.4347	0.5788	0.5685	0.4872	0.535	0.5144	1.2078	1.1949	1.1949	1.1949	0.4119	1.4499	0.5144	0.4119	0.4935	0.4935	0.6622	0.5509	0.5537	0.4409	1.2172
ileglnglu[c][e]	-0.1492	0.3533	0.3169	0.3169	0.3169	0.3317	0.3313	0.3416	0.3317	0.3173	0.3173	0.4849	0.2906	0.4501	0.3169	0.9052	0.2944	0.3486	1.5384	0.548	0.548	0.548	0.5014	0.4809	0.5105	0.0688	0.503	0.503	0.4347	0.5788	0.5685	0.4872	0.535	0.5144	1.2078	1.1949	1.1949	1.1949	0.4119	1.4501	0.5147	0.4119	0.4935	0.4935	0.6625	0.5509	0.5541	0.4409	1.2174
ileglyarg[c][e]	-0.1455	0.3566	0.3206	0.3206	0.3206	0.3351	0.3351	0.3453	0.3354	0.3206	0.3206	0.4883	0.2944	0.4538	0.3206	0.9087	0.2981	0.3523	1.5421	0.5511	0.5511	0.5511	0.5044	0.4846	0.5136	0.072	0.5064	0.5064	0.4384	0.5822	0.5719	0.4906	0.5381	0.5175	1.2109	1.198	1.198	1.198	0.4149	1.4531	0.5178	0.4149	0.4965	0.4965	0.6657	0.554	0.5568	0.4439	1.2203
ileprolys[c][e]	-9.8505	-0.6807	-0.6906	-0.6906	-0.6906	-0.6906	-0.6906	-0.6906	-0.6906	-0.6906	-0.6906	-0.6906	-0.6906	-0.6906	-0.6906	-0.6906	-0.6906	-0.6906	-8.1634	-1.9136	-1.9136	-1.9136	-1.9136	-9.2265	-1.9136	-9.6423	-1.9136	-1.9136	-9.2678	-1.9136	-1.9136	-9.2146	-1.9136	-1.9136	-1.5708	-1.5757	-1.5757	-1.5757	-1.5757	-1.5757	-1.5757	-1.5757	-1.5757	-1.5757	-1.5757	-1.5757	-1.5757	-1.5757	-1.5757
ileserarg[c][e]	-0.1492	0.3533	0.3169	0.3169	0.3169	0.3317	0.3313	0.3416	0.3317	0.3173	0.3173	0.4849	0.2906	0.4501	0.3169	0.9052	0.2944	0.3486	1.5384	0.548	0.548	0.548	0.5014	0.4809	0.5105	0.0688	0.503	0.503	0.4347	0.5788	0.5685	0.4872	0.535	0.5144	1.2078	1.1949	1.1949	1.1949	0.4119	1.4501	0.5147	0.4119	0.4935	0.4935	0.6625	0.5509	0.5541	0.4409	1.2174
iletrptyr[c][e]	-0.1487	0.3525	0.3162	0.3162	0.3162	0.331	0.331	0.3413	0.331	0.3165	0.3165	0.4846	0.2903	0.4497	0.3165	0.9047	0.294	0.3482	1.5385	0.548	0.548	0.548	0.5014	0.4809	0.5105	0.0674	0.503	0.503	0.4347	0.5788	0.5685	0.4872	0.535	0.5144	1.2078	1.1949	1.1949	1.1949	0.4119	1.4501	0.5147	0.4119	0.4935	0.4935	0.6625	0.5509	0.5541	0.4409	1.2174
im4ac[c][e]	-0.1492	0.3533	0.3169	0.3169	0.3169	0.3317	0.3313	0.3416	0.3317	0.3173	0.3173	0.4849	0.2906	0.4501	0.3169	0.9052	0.2944	0.3486	1.5384	0.548	0.548	0.548	0.5014	0.4809	0.5105	0.0688	0.503	0.503	0.4347	0.5788	0.5685	0.4872	0.535	0.5144	1.2078	1.1949	1.1949	1.1949	0.4119	1.4501	0.5147	0.4119	0.4935	0.4935	0.6625	0.5509	0.5541	0.4409	1.2174
imp[c][e]	4.7826	0.3528	0.3168	0.3168	0.3168	0.3313	0.3313	0.3415	0.3316	0.317	0.317	0.4846	0.2905	0.4498	0.3168	0.905	0.2943	0.3485	1.5382	0.5475	0.5475	0.5475	0.5008	0.4806	0.5099	0.0682	0.5027	0.5027	0.4345	0.5785	0.5683	0.4869	0.5344	0.5138	1.208	1.195	1.195	1.195	0.4119	1.45	0.5146	0.4119	0.4935	0.4935	0.6625	0.5507	0.5539	0.4409	1.2173
ind3ac[c][e][m]	-0.1492	0.3533	0.3169	0.3169	0.3169	0.3315	0.3313	0.3416	0.3317	0.3173	0.3173	0.4849	0.2906	0.4501	0.3169	0.9052	0.2944	0.3486	1.5384	0.548	0.548	0.548	0.5014	0.4809	0.5105	0.0685	0.503	0.503	0.4347	0.5788	0.5685	0.4872	0.535	0.5144	1.2078	1.195	1.195	1.195	0.4119	1.4501	0.5147	0.4119	0.4935	0.4935	0.6625	0.5509	0.5541	0.4409	1.2174
inost[c][e][r]	0.716	0.7124	0.7123	0.7123	0.7123	0.7123	0.7123	0.7123	0.7123	0.7123	0.7123	0.7123	0.7123	0.7123	0.7123	0.7123	0.7123	0.7123	0.5197	-0.8541	-0.8541	-0.8541	-0.8541	-0.6716	-0.8541	1.0918	-0.8541	-0.8541	0.029	-0.8541	-0.8541	0.3974	-0.8541	-0.8541	-1.0595	-1.0596	-1.0596	-1.0596	-1.0599	-1.0595	-1.0598	-1.0599	-1.0599	-1.0599	-1.0598	-1.0598	-1.0598	-1.0599	-1.0596
ins[c][e]	-0.1492	0.353	0.3169	0.3168	0.3169	0.3314	0.3314	0.3417	0.3316	0.3171	0.3171	0.4847	0.2906	0.4499	0.3169	0.905	0.2944	0.3486	1.5383	0.5479	0.5479	0.5479	0.501	0.4809	0.5102	0.0683	0.5028	0.5028	0.4347	0.5786	0.5683	0.487	0.5347	0.5142	1.2079	1.195	1.195	1.195	0.4119	1.45	0.5146	0.4119	0.4935	0.4935	0.6623	0.5508	0.5538	0.4409	1.2173
ipdp[c][x]	5.6888	0.3537	0.3175	0.3175	0.3175	0.3323	0.3321	0.3425	0.3323	0.3177	0.3177	0.4851	0.2912	0.4505	0.3175	0.9055	0.295	0.3491	1.5387	0.5482	0.5482	0.5482	0.5015	0.4816	0.5104	0.0692	0.5032	0.5032	0.4352	0.579	0.5687	0.4873	0.535	0.5145	1.2085	1.1957	1.1957	1.1957	0.4125	1.4507	0.5153	0.4125	0.494	0.494	0.6627	0.5514	0.5545	0.4414	1.2179
isochol[c][e]	-0.1488	0.353	0.3166	0.3166	0.3166	0.3314	0.3314	0.3417	0.3314	0.317	0.317	0.4847	0.2907	0.4502	0.317	0.9052	0.2945	0.3487	1.5385	0.5479	0.5479	0.5479	0.5012	0.4807	0.5103	0.0688	0.5028	0.5028	0.4348	0.5786	0.5687	0.4873	0.5348	0.5142	1.2077	1.1948	1.1948	1.1948	0.4117	1.4498	0.5145	0.4117	0.4933	0.4933	0.6624	0.5507	0.5536	0.4406	1.2171
itaccoa[m]	-14.9629	-1.3156	-1.3162	-1.3162	-1.3162	-1.3162	-1.3162	-1.3162	-1.3162	-1.3162	-1.3162	-1.3162	-1.3162	-1.3162	-1.3162	-1.3161	-1.3162	-1.3162	0.6225	0.2487	0.2487	0.2487	0.2487	0.2653	0.2487	-2.0512	0.2487	0.2487	0.4595	0.2487	0.2487	0.5851	0.2487	0.2487	0.0969	0.0969	0.0969	0.0969	0.0968	0.0969	0.0968	0.0968	0.0968	0.0968	0.0968	0.0968	0.0968	0.0968	0.0969
itacon[c][e][m]	-13.6417	-1.3154	-1.316	-1.316	-1.316	-1.316	-1.316	-1.316	-1.316	-1.316	-1.316	-1.316	-1.316	-1.316	-1.316	-1.3159	-1.316	-1.316	0.6225	0.2487	0.2487	0.2487	0.2487	0.2653	0.2487	-2.051	0.2487	0.2487	0.4595	0.2487	0.2487	0.5851	0.2487	0.2487	0.0969	0.0969	0.0969	0.0969	0.0968	0.097	0.0969	0.0968	0.0969	0.0969	0.0969	0.0969	0.0969	0.0969	0.0969
itp[c][e][n]	0.4543	-0.2234	-0.2233	-0.2233	-0.2233	-0.2233	-0.2233	-0.2233	-0.2233	-0.2233	-0.2233	-0.2233	-0.2233	-0.2233	-0.2233	-0.2232	-0.2233	-0.2233	-0.833	-2.0256	-2.0256	-2.0256	-2.0256	-2.1308	-2.0256	-0.2128	-2.0256	-2.0256	-2.1944	-2.0256	-2.0256	-1.2051	-2.0256	-2.0256	-2.0291	-2.0291	-2.0291	-2.0291	-2.0298	-2.0288	-2.0297	-2.0298	-2.0297	-2.0297	-2.0296	-2.0297	-2.0297	-2.0298	-2.0291
ivcoa[c][m]	-0.1492	0.3533	0.3169	0.3169	0.3169	0.3317	0.3313	0.3416	0.3317	0.3173	0.3173	0.4849	0.2906	0.4501	0.3169	0.9052	0.2944	0.3486	1.5385	0.548	0.548	0.548	0.5014	0.4809	0.5105	0.0683	0.503	0.503	0.4347	0.5788	0.5685	0.4872	0.535	0.5144	1.208	1.1951	1.1951	1.1951	0.4119	1.4501	0.5147	0.4119	0.4935	0.4935	0.6625	0.5509	0.5541	0.4409	1.2174
ivcrn[c][e]	-0.1492	0.3533	0.3169	0.3169	0.3169	0.3317	0.3313	0.3416	0.3317	0.3173	0.3173	0.4849	0.2906	0.4501	0.3169	0.9052	0.2944	0.3486	1.5385	0.548	0.548	0.548	0.5014	0.4809	0.5105	0.0683	0.503	0.503	0.4347	0.5788	0.5685	0.4872	0.535	0.5144	1.208	1.1951	1.1951	1.1951	0.4119	1.4501	0.5147	0.4119	0.4935	0.4935	0.6625	0.5509	0.5541	0.4409	1.2174
k[c][e][g]	0.4863	0.03	0.0302	0.0302	0.0302	0.0302	0.0302	0.0302	0.0302	0.0302	0.0302	0.0302	0.0302	0.0302	0.0302	0.0302	0.0302	0.0302	1.3764	0.7823	0.7823	0.7823	0.7823	0.8431	0.7823	-0.3308	0.7823	0.7823	1.1003	0.7823	0.7823	1.2951	0.7823	0.7823	0.696	0.696	0.696	0.696	0.696	0.696	0.696	0.696	0.696	0.696	0.696	0.696	0.696	0.696	0.696
ksi_deg10[l]	-0.1492	0.3533	0.3169	0.3169	0.3169	0.3317	0.3313	0.3416	0.3317	0.3173	0.3173	0.4849	0.2906	0.4501	0.3169	0.9052	0.2944	0.3486	1.5384	0.548	0.548	0.548	0.5014	0.4809	0.5105	0.0688	0.503	0.503	0.4347	0.5788	0.5685	0.4872	0.535	0.5144	1.2078	1.1949	1.1949	1.1949	0.4119	1.4501	0.5147	0.4119	0.4935	0.4935	0.6625	0.5509	0.5541	0.4409	1.2174
ksi_deg12[l]	-0.1492	0.3533	0.3169	0.3169	0.3169	0.3317	0.3313	0.3416	0.3317	0.3173	0.3173	0.4849	0.2906	0.4501	0.3169	0.9052	0.2944	0.3486	1.5384	0.548	0.548	0.548	0.5014	0.4809	0.5105	0.0688	0.503	0.503	0.4347	0.5788	0.5685	0.4872	0.535	0.5144	1.2078	1.1949	1.1949	1.1949	0.4119	1.4501	0.5147	0.4119	0.4935	0.4935	0.6625	0.5509	0.5541	0.4409	1.2174
ksi_deg13[l]	-0.1492	0.3533	0.3169	0.3169	0.3169	0.3317	0.3313	0.3416	0.3317	0.3173	0.3173	0.4849	0.2906	0.4501	0.3169	0.9052	0.2944	0.3486	1.5384	0.548	0.548	0.548	0.5014	0.4809	0.5105	0.0688	0.503	0.503	0.4347	0.5788	0.5685	0.4872	0.535	0.5144	1.2078	1.1949	1.1949	1.1949	0.4119	1.4501	0.5147	0.4119	0.4935	0.4935	0.6625	0.5509	0.5541	0.4409	1.2174
ksi_deg15[l]	-0.1492	0.3533	0.3169	0.3169	0.3169	0.3317	0.3313	0.3416	0.3317	0.3173	0.3173	0.4849	0.2906	0.4501	0.3169	0.9052	0.2944	0.3486	1.5384	0.548	0.548	0.548	0.5014	0.4809	0.5105	0.0688	0.503	0.503	0.4347	0.5788	0.5685	0.4872	0.535	0.5144	1.2078	1.1949	1.1949	1.1949	0.4119	1.4501	0.5147	0.4119	0.4935	0.4935	0.6625	0.5509	0.5541	0.4409	1.2174
ksi_deg16[l]	-0.1492	0.3533	0.3169	0.3169	0.3169	0.3317	0.3313	0.3416	0.3317	0.3173	0.3173	0.4849	0.2906	0.4501	0.3169	0.9052	0.2944	0.3486	1.5384	0.548	0.548	0.548	0.5014	0.4809	0.5105	0.0688	0.503	0.503	0.4347	0.5788	0.5685	0.4872	0.535	0.5144	1.2078	1.1949	1.1949	1.1949	0.4119	1.4501	0.5147	0.4119	0.4935	0.4935	0.6625	0.5509	0.5541	0.4409	1.2174
ksi_deg18[l]	-0.1492	0.3533	0.3169	0.3169	0.3169	0.3317	0.3313	0.3416	0.3317	0.3173	0.3173	0.4849	0.2906	0.4501	0.3169	0.9052	0.2944	0.3486	1.5384	0.548	0.548	0.548	0.5014	0.4809	0.5105	0.0688	0.503	0.503	0.4347	0.5788	0.5685	0.4872	0.535	0.5144	1.2078	1.1949	1.1949	1.1949	0.4119	1.4501	0.5147	0.4119	0.4935	0.4935	0.6625	0.5509	0.5541	0.4409	1.2174
ksi_deg19[l]	-0.1492	0.3533	0.3169	0.3169	0.3169	0.3317	0.3313	0.3416	0.3317	0.3173	0.3173	0.4849	0.2906	0.4501	0.3169	0.9052	0.2944	0.3486	1.5384	0.548	0.548	0.548	0.5014	0.4809	0.5105	0.0688	0.503	0.503	0.4347	0.5788	0.5685	0.4872	0.535	0.5144	1.2078	1.1949	1.1949	1.1949	0.4119	1.4501	0.5147	0.4119	0.4935	0.4935	0.6625	0.5509	0.5541	0.4409	1.2174
ksi_deg21[l]	-0.1492	0.3533	0.3169	0.3169	0.3169	0.3317	0.3313	0.3416	0.3317	0.3173	0.3173	0.4849	0.2906	0.4501	0.3169	0.9052	0.2944	0.3486	1.5384	0.548	0.548	0.548	0.5014	0.4809	0.5105	0.0688	0.503	0.503	0.4347	0.5788	0.5685	0.4872	0.535	0.5144	1.2078	1.1949	1.1949	1.1949	0.4119	1.4501	0.5147	0.4119	0.4935	0.4935	0.6625	0.5509	0.5541	0.4409	1.2174
ksi_deg22[l]	-0.1492	0.3533	0.3169	0.3169	0.3169	0.3317	0.3313	0.3416	0.3317	0.3173	0.3173	0.4849	0.2906	0.4501	0.3169	0.9052	0.2944	0.3486	1.5384	0.548	0.548	0.548	0.5014	0.4809	0.5105	0.0688	0.503	0.503	0.4347	0.5788	0.5685	0.4872	0.535	0.5144	1.2078	1.1949	1.1949	1.1949	0.4119	1.4501	0.5147	0.4119	0.4935	0.4935	0.6625	0.5509	0.5541	0.4409	1.2174
ksi_deg24[l]	-0.1492	0.3533	0.3169	0.3169	0.3169	0.3317	0.3313	0.3416	0.3317	0.3173	0.3173	0.4849	0.2906	0.4501	0.3169	0.9052	0.2944	0.3486	1.5384	0.548	0.548	0.548	0.5014	0.4809	0.5105	0.0688	0.503	0.503	0.4347	0.5788	0.5685	0.4872	0.535	0.5144	1.2078	1.1949	1.1949	1.1949	0.4119	1.4501	0.5147	0.4119	0.4935	0.4935	0.6625	0.5509	0.5541	0.4409	1.2174
ksi_deg25[l]	-0.1492	0.3533	0.3169	0.3169	0.3169	0.3317	0.3313	0.3416	0.3317	0.3173	0.3173	0.4849	0.2906	0.4501	0.3169	0.9052	0.2944	0.3486	1.5384	0.548	0.548	0.548	0.5014	0.4809	0.5105	0.0688	0.503	0.503	0.4347	0.5788	0.5685	0.4872	0.535	0.5144	1.2078	1.1949	1.1949	1.1949	0.4119	1.4501	0.5147	0.4119	0.4935	0.4935	0.6625	0.5509	0.5541	0.4409	1.2174
ksi_deg27[l]	-0.1492	0.3533	0.3169	0.3169	0.3169	0.3317	0.3313	0.3416	0.3317	0.3173	0.3173	0.4849	0.2906	0.4501	0.3169	0.9052	0.2944	0.3486	1.5384	0.548	0.548	0.548	0.5014	0.4809	0.5105	0.0688	0.503	0.503	0.4347	0.5788	0.5685	0.4872	0.535	0.5144	1.2078	1.1949	1.1949	1.1949	0.4119	1.4501	0.5147	0.4119	0.4935	0.4935	0.6625	0.5509	0.5541	0.4409	1.2174
ksi_deg28[l]	-0.1492	0.3533	0.3169	0.3169	0.3169	0.3317	0.3313	0.3416	0.3317	0.3173	0.3173	0.4849	0.2906	0.4501	0.3169	0.9052	0.2944	0.3486	1.5384	0.548	0.548	0.548	0.5014	0.4809	0.5105	0.0688	0.503	0.503	0.4347	0.5788	0.5685	0.4872	0.535	0.5144	1.2078	1.1949	1.1949	1.1949	0.4119	1.4501	0.5147	0.4119	0.4935	0.4935	0.6625	0.5509	0.5541	0.4409	1.2174
ksi_deg30[l]	-0.1492	0.3533	0.3169	0.3169	0.3169	0.3317	0.3313	0.3416	0.3317	0.3173	0.3173	0.4849	0.2906	0.4501	0.3169	0.9052	0.2944	0.3486	1.5384	0.548	0.548	0.548	0.5014	0.4809	0.5105	0.0688	0.503	0.503	0.4347	0.5788	0.5685	0.4872	0.535	0.5144	1.2078	1.1949	1.1949	1.1949	0.4119	1.4501	0.5147	0.4119	0.4935	0.4935	0.6625	0.5509	0.5541	0.4409	1.2174
ksi_deg31[l]	-0.1492	0.3533	0.3169	0.3169	0.3169	0.3317	0.3313	0.3416	0.3317	0.3173	0.3173	0.4849	0.2906	0.4501	0.3169	0.9052	0.2944	0.3486	1.5384	0.548	0.548	0.548	0.5014	0.4809	0.5105	0.0688	0.503	0.503	0.4347	0.5788	0.5685	0.4872	0.535	0.5144	1.2078	1.1949	1.1949	1.1949	0.4119	1.4501	0.5147	0.4119	0.4935	0.4935	0.6625	0.5509	0.5541	0.4409	1.2174
ksi_deg33[l]	-0.1492	0.3533	0.3169	0.3169	0.3169	0.3317	0.3313	0.3416	0.3317	0.3173	0.3173	0.4849	0.2906	0.4501	0.3169	0.9052	0.2944	0.3486	1.5384	0.548	0.548	0.548	0.5014	0.4809	0.5105	0.0688	0.503	0.503	0.4347	0.5788	0.5685	0.4872	0.535	0.5144	1.2078	1.1949	1.1949	1.1949	0.4119	1.4501	0.5147	0.4119	0.4935	0.4935	0.6625	0.5509	0.5541	0.4409	1.2174
ksi_deg34[l]	-0.1492	0.3533	0.3169	0.3169	0.3169	0.3317	0.3313	0.3416	0.3317	0.3173	0.3173	0.4849	0.2906	0.4501	0.3169	0.9052	0.2944	0.3486	1.5384	0.548	0.548	0.548	0.5014	0.4809	0.5105	0.0688	0.503	0.503	0.4347	0.5788	0.5685	0.4872	0.535	0.5144	1.2078	1.1949	1.1949	1.1949	0.4119	1.4501	0.5147	0.4119	0.4935	0.4935	0.6625	0.5509	0.5541	0.4409	1.2174
ksi_deg36[l]	-0.1492	0.3533	0.3169	0.3169	0.3169	0.3317	0.3313	0.3416	0.3317	0.3173	0.3173	0.4849	0.2906	0.4501	0.3169	0.9052	0.2944	0.3486	1.5384	0.548	0.548	0.548	0.5014	0.4809	0.5105	0.0688	0.503	0.503	0.4347	0.5788	0.5685	0.4872	0.535	0.5144	1.2078	1.1949	1.1949	1.1949	0.4119	1.4501	0.5147	0.4119	0.4935	0.4935	0.6625	0.5509	0.5541	0.4409	1.2174
ksi_deg37[l]	-0.1492	0.3533	0.3169	0.3169	0.3169	0.3317	0.3313	0.3416	0.3317	0.3173	0.3173	0.4849	0.2906	0.4501	0.3169	0.9052	0.2944	0.3486	1.5384	0.548	0.548	0.548	0.5014	0.4809	0.5105	0.0688	0.503	0.503	0.4347	0.5788	0.5685	0.4872	0.535	0.5144	1.2078	1.1949	1.1949	1.1949	0.4119	1.4501	0.5147	0.4119	0.4935	0.4935	0.6625	0.5509	0.5541	0.4409	1.2174
ksi_deg4[l]	-0.1492	0.3533	0.3169	0.3169	0.3169	0.3317	0.3313	0.3416	0.3317	0.3173	0.3173	0.4849	0.2906	0.4501	0.3169	0.9052	0.2944	0.3486	1.5384	0.548	0.548	0.548	0.5014	0.4809	0.5105	0.0688	0.503	0.503	0.4347	0.5788	0.5685	0.4872	0.535	0.5144	1.2078	1.1949	1.1949	1.1949	0.4119	1.4501	0.5147	0.4119	0.4935	0.4935	0.6625	0.5509	0.5541	0.4409	1.2174
ksi_deg5[l]	-0.1492	0.3533	0.3169	0.3169	0.3169	0.3317	0.3313	0.3416	0.3317	0.3173	0.3173	0.4849	0.2906	0.4501	0.3169	0.9052	0.2944	0.3486	1.5384	0.548	0.548	0.548	0.5014	0.4809	0.5105	0.0688	0.503	0.503	0.4347	0.5788	0.5685	0.4872	0.535	0.5144	1.2078	1.1949	1.1949	1.1949	0.4119	1.4501	0.5147	0.4119	0.4935	0.4935	0.6625	0.5509	0.5541	0.4409	1.2174
ksi_deg6[l]	-0.1492	0.3533	0.3169	0.3169	0.3169	0.3317	0.3313	0.3416	0.3317	0.3173	0.3173	0.4849	0.2906	0.4501	0.3169	0.9052	0.2944	0.3486	1.5384	0.548	0.548	0.548	0.5014	0.4809	0.5105	0.0688	0.503	0.503	0.4347	0.5788	0.5685	0.4872	0.535	0.5144	1.2078	1.1949	1.1949	1.1949	0.4119	1.4501	0.5147	0.4119	0.4935	0.4935	0.6625	0.5509	0.5541	0.4409	1.2174
ksi_deg7[l]	-0.1492	0.3533	0.3169	0.3169	0.3169	0.3317	0.3313	0.3416	0.3317	0.3173	0.3173	0.4849	0.2906	0.4501	0.3169	0.9052	0.2944	0.3486	1.5384	0.548	0.548	0.548	0.5014	0.4809	0.5105	0.0688	0.503	0.503	0.4347	0.5788	0.5685	0.4872	0.535	0.5144	1.2078	1.1949	1.1949	1.1949	0.4119	1.4501	0.5147	0.4119	0.4935	0.4935	0.6625	0.5509	0.5541	0.4409	1.2174
ksi_deg9[l]	-0.1492	0.3533	0.3169	0.3169	0.3169	0.3317	0.3313	0.3416	0.3317	0.3173	0.3173	0.4849	0.2906	0.4501	0.3169	0.9052	0.2944	0.3486	1.5384	0.548	0.548	0.548	0.5014	0.4809	0.5105	0.0688	0.503	0.503	0.4347	0.5788	0.5685	0.4872	0.535	0.5144	1.2078	1.1949	1.1949	1.1949	0.4119	1.4501	0.5147	0.4119	0.4935	0.4935	0.6625	0.5509	0.5541	0.4409	1.2174
ksii_core2_deg1[l]	-0.1492	0.3533	0.3169	0.3169	0.3169	0.3313	0.3313	0.3416	0.3317	0.3173	0.3173	0.4849	0.2906	0.4501	0.3169	0.9052	0.2944	0.3486	1.5385	0.548	0.548	0.548	0.5014	0.4809	0.5105	0.0683	0.503	0.503	0.4347	0.5788	0.5685	0.4872	0.535	0.5144	1.2078	1.1949	1.1949	1.1949	0.4119	1.4501	0.5147	0.4119	0.4935	0.4935	0.6625	0.5509	0.5541	0.4409	1.2174
ksii_core2_deg2[l]	-0.1492	0.3533	0.3169	0.3169	0.3169	0.3313	0.3313	0.3416	0.3317	0.3173	0.3173	0.4849	0.2906	0.4501	0.3169	0.9052	0.2944	0.3486	1.5385	0.548	0.548	0.548	0.5014	0.4809	0.5105	0.0683	0.503	0.503	0.4347	0.5788	0.5685	0.4872	0.535	0.5144	1.2078	1.1949	1.1949	1.1949	0.4119	1.4501	0.5147	0.4119	0.4935	0.4935	0.6625	0.5509	0.5541	0.4409	1.2174
ksii_core2_deg3[l]	-0.1492	0.3533	0.3169	0.3169	0.3169	0.3317	0.3313	0.3416	0.3317	0.3173	0.3173	0.4849	0.2906	0.4501	0.3169	0.9052	0.2944	0.3486	1.5384	0.548	0.548	0.548	0.5014	0.4809	0.5105	0.0688	0.503	0.503	0.4347	0.5788	0.5685	0.4872	0.535	0.5144	1.2078	1.1949	1.1949	1.1949	0.4119	1.4501	0.5147	0.4119	0.4935	0.4935	0.6625	0.5509	0.5541	0.4409	1.2174
ksii_core2_deg4[l]	-0.1492	0.3533	0.3169	0.3169	0.3169	0.3317	0.3313	0.3416	0.3317	0.3173	0.3173	0.4849	0.2906	0.4501	0.3169	0.9052	0.2944	0.3486	1.5384	0.548	0.548	0.548	0.5014	0.4809	0.5105	0.0688	0.503	0.503	0.4347	0.5788	0.5685	0.4872	0.535	0.5144	1.2078	1.1949	1.1949	1.1949	0.4119	1.4501	0.5147	0.4119	0.4935	0.4935	0.6625	0.5509	0.5541	0.4409	1.2174
ksii_core2_deg6[l]	-0.1492	0.3533	0.3169	0.3169	0.3169	0.3313	0.3313	0.3416	0.3317	0.3173	0.3173	0.4849	0.2906	0.4501	0.3169	0.9052	0.2944	0.3486	1.5384	0.548	0.548	0.548	0.5014	0.4809	0.5105	0.0683	0.503	0.503	0.4347	0.5788	0.5685	0.4872	0.535	0.5144	1.2078	1.1949	1.1949	1.1949	0.4119	1.4501	0.5147	0.4119	0.4935	0.4935	0.6625	0.5509	0.5541	0.4409	1.2174
ksii_core2_deg7[l]	-0.1492	0.3533	0.3169	0.3169	0.3169	0.3313	0.3313	0.3416	0.3317	0.3173	0.3173	0.4849	0.2906	0.4501	0.3169	0.9052	0.2944	0.3486	1.5384	0.548	0.548	0.548	0.5014	0.4809	0.5105	0.0683	0.503	0.503	0.4347	0.5788	0.5685	0.4872	0.535	0.5144	1.2078	1.1949	1.1949	1.1949	0.4119	1.4501	0.5147	0.4119	0.4935	0.4935	0.6625	0.5509	0.5541	0.4409	1.2174
ksii_core4_deg1[l]	-0.1492	0.3533	0.3169	0.3169	0.3169	0.3313	0.3313	0.3416	0.3317	0.3173	0.3173	0.4849	0.2906	0.4501	0.3169	0.9052	0.2944	0.3486	1.5384	0.548	0.548	0.548	0.5014	0.4809	0.5105	0.0683	0.503	0.503	0.4347	0.5788	0.5685	0.4872	0.535	0.5144	1.2078	1.1949	1.1949	1.1949	0.4119	1.4501	0.5147	0.4119	0.4935	0.4935	0.6625	0.5509	0.5541	0.4409	1.2174
ksii_core4_deg2[l]	-0.1492	0.3533	0.3169	0.3169	0.3169	0.3313	0.3313	0.3416	0.3317	0.3173	0.3173	0.4849	0.2906	0.4501	0.3169	0.9052	0.2944	0.3486	1.5384	0.548	0.548	0.548	0.5014	0.4809	0.5105	0.0683	0.503	0.503	0.4347	0.5788	0.5685	0.4872	0.535	0.5144	1.2078	1.1949	1.1949	1.1949	0.4119	1.4501	0.5147	0.4119	0.4935	0.4935	0.6625	0.5509	0.5541	0.4409	1.2174
ksii_core4_deg3[l]	-0.1492	0.3533	0.3169	0.3169	0.3169	0.3317	0.3313	0.3416	0.3317	0.3173	0.3173	0.4849	0.2906	0.4501	0.3169	0.9052	0.2944	0.3486	1.5384	0.548	0.548	0.548	0.5014	0.4809	0.5105	0.0688	0.503	0.503	0.4347	0.5788	0.5685	0.4872	0.535	0.5144	1.2078	1.1949	1.1949	1.1949	0.4119	1.4501	0.5147	0.4119	0.4935	0.4935	0.6625	0.5509	0.5541	0.4409	1.2174
ksii_core4_deg4[l]	-0.1492	0.3533	0.3169	0.3169	0.3169	0.3317	0.3313	0.3416	0.3317	0.3173	0.3173	0.4849	0.2906	0.4501	0.3169	0.9052	0.2944	0.3486	1.5384	0.548	0.548	0.548	0.5014	0.4809	0.5105	0.0688	0.503	0.503	0.4347	0.5788	0.5685	0.4872	0.535	0.5144	1.2078	1.1949	1.1949	1.1949	0.4119	1.4501	0.5147	0.4119	0.4935	0.4935	0.6625	0.5509	0.5541	0.4409	1.2174
kynate[c]	-0.1488	0.3532	0.3169	0.3166	0.3169	0.3315	0.3315	0.3419	0.3315	0.3171	0.3171	0.4849	0.2909	0.4503	0.3169	0.9052	0.2945	0.3485	1.5386	0.5474	0.5474	0.5474	0.5009	0.4809	0.5101	9.2673	0.5026	0.5026	0.4347	0.5786	0.5684	0.4872	0.5346	0.514	1.2076	1.1947	1.1947	1.1947	0.4117	1.4498	0.5142	0.4117	0.4931	0.4931	0.6621	0.5506	0.5536	0.4404	1.217
L_dpchrm[c]	-0.1492	0.3533	0.3169	0.3169	0.3169	0.3317	0.3313	0.3416	0.3317	0.3173	0.3173	0.4849	0.2906	0.4501	0.3169	0.9052	0.2944	0.3486	1.5384	0.548	0.548	0.548	0.5014	0.4809	0.5102	0.0683	0.503	0.503	0.4347	0.5788	0.5685	0.4872	0.535	0.5144	1.2078	1.1949	1.1949	1.1949	0.4119	1.4501	0.5147	0.4119	0.4935	0.4935	0.6625	0.5509	0.5541	0.4409	1.2174
L2aadp[c][e][m]	-1.7342	0.353	0.3169	0.3169	0.3169	0.3313	0.3313	0.3416	0.3317	0.317	0.317	0.4848	0.2906	0.4501	0.3169	0.9052	0.2944	0.3486	1.5384	0.548	0.548	0.548	0.5011	0.4809	0.5102	0.0685	0.503	0.503	0.4347	0.5788	0.5685	0.4872	0.5348	0.5143	1.2078	1.1949	1.1949	1.1949	0.4119	1.4499	0.5145	0.4119	0.4934	0.4934	0.6625	0.5507	0.5538	0.4409	1.2172
L2aadp6sa[c][m]	-25.8923	0.3529	0.3169	0.3169	0.3169	0.3313	0.3313	0.3416	0.3317	0.3169	0.3169	0.4849	0.2906	0.4501	0.3169	0.9052	0.2944	0.3486	1.5384	0.548	0.548	0.548	0.501	0.4809	0.5102	0.0683	0.503	0.503	0.4347	0.5788	0.5685	0.4872	0.5347	0.5144	1.2078	1.1949	1.1949	1.1949	0.4119	1.4499	0.5144	0.4119	0.4935	0.4935	0.6625	0.5506	0.5537	0.4409	1.2172
lac_D[c][e][m]	0.7899	0.5002	0.5007	0.5007	0.5007	0.5007	0.5007	0.5007	0.5007	0.5007	0.5007	0.5007	0.5007	0.5007	0.5007	0.5007	0.5007	0.5007	-12.6284	-13.6044	-13.6044	-13.6044	-13.6511	-13.6586	-13.6435	0.6874	-13.6487	-13.6487	-13.7569	-13.5848	-13.5831	-13.6683	-13.616	-13.6367	-3.2623	-3.2642	-3.2642	-3.2642	-3.2647	-3.2639	-3.2647	-3.2647	-3.2647	-3.2647	-3.2646	-3.2646	-3.2646	-3.2647	-3.2641
lac_L[c][e][m][x]	0.5531	0.4283	0.4277	0.4277	0.4277	0.4277	0.4277	0.4277	0.4277	0.4277	0.4277	0.4277	0.4277	0.4277	0.4277	0.4277	0.4277	0.4277	-0.7957	-1.63	-1.63	-1.63	-1.63	-1.587	-1.63	0.5722	-1.63	-1.63	-1.1167	-1.63	-1.63	-0.8936	-1.63	-1.63	-1.087	-1.0856	-1.0856	-1.0856	-1.0857	-1.0856	-1.0857	-1.0857	-1.0857	-1.0857	-1.0857	-1.0857	-1.0857	-1.0857	-1.0856
lald_D[c]	-0.1438	0.3564	0.3201	0.3201	0.3201	0.3347	0.3347	0.3451	0.335	0.3206	0.3206	0.4887	0.294	0.4543	0.3203	0.9088	0.2979	0.353	1.5163	0.5178	0.5178	0.5178	0.4726	0.4663	0.4831	0.0749	0.4742	0.4742	0.3909	0.5453	0.544	0.4758	0.5062	0.4858	1.2154	1.2024	1.2024	1.2024	0.4192	1.4574	0.5217	0.4192	0.5009	0.5009	0.6717	0.5585	0.5612	0.4483	1.2249
lald_L[c][m]	-0.1492	0.3533	0.3169	0.3169	0.3169	0.3313	0.3313	0.3416	0.3317	0.3173	0.3173	0.4849	0.2906	0.4501	0.3169	0.9052	0.2944	0.3486	1.5384	0.548	0.548	0.548	0.5014	0.4809	0.5105	0.0688	0.503	0.503	0.4347	0.5788	0.5685	0.4872	0.535	0.5144	1.2078	1.1949	1.1949	1.1949	0.4119	1.4501	0.5147	0.4119	0.4935	0.4935	0.6625	0.5509	0.5541	0.4409	1.2174
lanost[c][e][r]	5.0785	0.3541	0.3176	0.3176	0.3176	0.3325	0.3321	0.3424	0.3325	0.318	0.318	0.4872	0.2913	0.4515	0.3176	0.9073	0.2951	0.3494	1.5382	0.5428	0.5428	0.5428	0.4964	0.4795	0.5059	0.0708	0.4981	0.4981	0.4331	0.5756	0.565	0.4855	0.53	0.5095	1.206	1.1928	1.1928	1.1928	0.4094	1.4478	0.5125	0.4094	0.4911	0.4911	0.6608	0.5485	0.5514	0.4386	1.215
lca24g[c][e][r]	-0.1492	0.3533	0.3169	0.3169	0.3169	0.3313	0.3313	0.3416	0.3317	0.3173	0.3173	0.4849	0.2906	0.4501	0.3169	0.9052	0.2944	0.3486	1.5384	0.548	0.548	0.548	0.5014	0.4809	0.5105	0.0688	0.503	0.503	0.4347	0.5788	0.5685	0.4872	0.535	0.5144	1.2078	1.1949	1.1949	1.1949	0.4119	1.4501	0.5147	0.4119	0.4935	0.4935	0.6625	0.5509	0.5541	0.4409	1.2174
lca3g[c][e][r]	-0.1492	0.3533	0.3169	0.3169	0.3169	0.3313	0.3313	0.3416	0.3317	0.3173	0.3173	0.4849	0.2906	0.4501	0.3169	0.9052	0.2944	0.3486	1.5384	0.548	0.548	0.548	0.5014	0.4809	0.5105	0.0688	0.503	0.503	0.4347	0.5788	0.5685	0.4872	0.535	0.5144	1.2078	1.1949	1.1949	1.1949	0.4119	1.4501	0.5147	0.4119	0.4935	0.4935	0.6625	0.5509	0.5541	0.4409	1.2174
lca3s[c][e]	-0.1492	0.3533	0.3169	0.3169	0.3169	0.3313	0.3313	0.3416	0.3317	0.3173	0.3173	0.4849	0.2906	0.4501	0.3169	0.9052	0.2944	0.3486	1.5384	0.548	0.548	0.548	0.5014	0.4809	0.5102	0.0683	0.503	0.503	0.4347	0.5788	0.5685	0.4872	0.535	0.5144	1.2078	1.1949	1.1949	1.1949	0.4119	1.4501	0.5147	0.4119	0.4935	0.4935	0.6625	0.5509	0.5541	0.4409	1.2172
Lcyst[c][e]	-0.1489	0.3533	0.317	0.317	0.317	0.3318	0.3314	0.3419	0.3318	0.3173	0.3173	0.485	0.2907	0.4501	0.317	0.9054	0.2945	0.3489	1.5386	0.5479	0.5479	0.5479	0.5011	0.481	0.5103	0.0686	0.5031	0.5031	0.435	0.5789	0.5686	0.4873	0.5349	0.5145	1.2079	1.195	1.195	1.195	0.412	1.45	0.5146	0.412	0.4933	0.4933	0.6626	0.5508	0.5539	0.4407	1.2173
Lcystin[c][e]	1.3409	1.2187	1.2204	1.2204	1.2204	1.2204	1.2204	1.2204	1.2204	1.2204	1.2204	1.2204	1.2204	1.2204	1.2204	1.2204	1.2204	1.2204	1.5703	1.5703	1.5703	1.5703	1.5703	1.5703	1.5703	0.8335	1.5703	1.5703	1.5703	1.5703	1.5703	1.5703	1.5703	1.5703	1.5703	1.5703	1.5703	1.5703	1.5703	1.5703	1.5703	1.5703	1.5703	1.5703	1.5703	1.5703	1.5703	1.5703	1.5703
leu_L[c][e][m]	0.7296	0.1408	0.141	0.141	0.141	0.141	0.141	0.141	0.141	0.141	0.141	0.1411	0.141	0.1411	0.141	0.1413	0.141	0.141	0.8915	0.3507	0.3507	0.3507	0.3507	0.3986	0.3507	0.1526	0.3507	0.3507	0.6501	0.3507	0.3507	0.8224	0.3507	0.3507	0.3143	0.3143	0.3143	0.3143	0.3139	0.3146	0.3139	0.3139	0.3139	0.3139	0.314	0.3139	0.3139	0.3139	0.3144
leualaarg[c][e]	-0.1488	0.3537	0.3174	0.3174	0.3174	0.3322	0.3318	0.3421	0.3322	0.3178	0.3178	0.4854	0.2911	0.4505	0.3174	0.9057	0.2949	0.349	1.5388	0.5485	0.5485	0.5485	0.5018	0.4814	0.511	10.7074	0.5035	0.5035	0.4352	0.5792	0.569	0.4877	0.5355	0.5149	1.2083	1.1954	1.1954	1.1954	0.4124	1.4505	0.5152	0.4124	0.4939	0.4939	0.663	0.5514	0.5545	0.4413	1.2179
leuasnasp[c][e]	-0.1492	0.3533	0.3169	0.3169	0.3169	0.3313	0.3313	0.3416	0.3317	0.3173	0.3173	0.4846	0.2906	0.4501	0.3169	0.9052	0.2944	0.3486	1.5385	0.548	0.548	0.548	0.5014	0.4809	0.5105	0.0683	0.503	0.503	0.4347	0.5788	0.5685	0.4872	0.535	0.5144	1.2078	1.1949	1.1949	1.1949	0.4119	1.4501	0.5147	0.4119	0.4935	0.4935	0.6625	0.5509	0.5541	0.4409	1.2174
leuasplys[c][e]	-0.1492	0.3533	0.3169	0.3169	0.3169	0.3313	0.3313	0.3416	0.3317	0.3173	0.3173	0.4849	0.2906	0.4501	0.3169	0.9052	0.2944	0.3486	1.5384	0.548	0.548	0.548	0.5014	0.4809	0.5105	0.0683	0.503	0.503	0.4347	0.5788	0.5685	0.4872	0.535	0.5144	1.2078	1.1949	1.1949	1.1949	0.4119	1.4501	0.5147	0.4119	0.4935	0.4935	0.6625	0.5509	0.5541	0.4409	1.2174
leuktrA4[c][e][r]	-0.1492	0.3529	0.3169	0.3167	0.3169	0.3313	0.3313	0.3416	0.3315	0.3171	0.3171	0.4847	0.2906	0.4501	0.3169	0.9051	0.2944	0.3486	1.5384	0.5479	0.5479	0.5479	0.5012	0.4809	0.5102	0.0683	0.503	0.503	0.4347	0.5786	0.5685	0.4872	0.5348	0.5142	1.2077	1.1949	1.1949	1.1949	0.4119	1.45	0.5146	0.4119	0.4933	0.4933	0.6622	0.5507	0.5539	0.4407	1.2172
leuktrB4[c][m][r][x]	3.036	3.3379	3.0246	3.0246	3.0246	3.0246	3.0246	3.0246	3.0246	3.0246	3.0246	3.0247	3.0246	3.0247	3.0246	3.0251	3.0246	3.0246	2.7408	-0.3069	-0.3069	-0.3069	-0.3073	-0.0682	-0.3072	2.9284	-0.3073	-0.3073	0.9779	-0.3066	-0.3067	1.4717	-0.307	-0.3072	0.4788	-0.3631	-0.3631	-0.3631	-0.3729	-0.3586	-0.3719	-0.3729	-0.3721	-0.3721	-0.3704	-0.3716	-0.3715	-0.3727	-0.3627
leuktrB4wcooh[c][e][m][r][x]	0.9643	2.1142	1.2101	1.2101	1.2101	1.2101	1.2101	1.2101	1.2101	1.2101	1.2101	1.2103	1.2101	1.2103	1.2101	1.211	1.2101	1.2101	2.7434	-0.3106	-0.3106	-0.3106	-0.3108	-0.0703	-0.3108	2.3253	-0.3108	-0.3108	0.9794	-0.3105	-0.3105	1.474	-0.3107	-0.3108	0.4758	-0.3722	-0.3722	-0.3722	-0.3763	-0.3703	-0.3759	-0.3763	-0.376	-0.376	-0.3752	-0.3757	-0.3757	-0.3762	-0.372
leuktrB4woh[c][e][m][r]	-0.1492	0.3533	0.3169	0.3169	0.3169	0.3313	0.3313	0.3416	0.3317	0.3173	0.3173	0.4849	0.2906	0.4501	0.3169	0.9052	0.2944	0.3486	1.5384	0.548	0.548	0.548	0.5011	0.4809	0.5103	10.6851	0.503	0.503	0.4347	0.5788	0.5685	0.4872	0.535	0.5144	1.2078	1.1949	1.1949	1.1949	0.4119	1.45	0.5146	0.4119	0.4935	0.4935	0.6625	0.5509	0.5541	0.4409	1.2173
leuktrC4[c][e][r]	-1.7342	0.3532	0.3169	0.3169	0.3169	0.3316	0.3313	0.3416	0.3317	0.3173	0.3173	0.4848	0.2906	0.4501	0.3169	0.9052	0.2944	0.3486	1.5384	0.548	0.548	0.548	0.5014	0.4809	0.5104	0.0686	0.503	0.503	0.4347	0.5788	0.5685	0.4872	0.535	0.5144	1.2078	1.1949	1.1949	1.1949	0.4119	1.4501	0.5147	0.4119	0.4935	0.4935	0.6624	0.5509	0.5541	0.4409	1.2174
leuktrD4[c][e][r]	-0.6347	0.353	0.3169	0.3169	0.3169	0.3315	0.3313	0.3416	0.3317	0.3173	0.3173	0.4847	0.2906	0.4501	0.3169	0.9052	0.2944	0.3486	1.5384	0.548	0.548	0.548	0.5014	0.4809	0.5103	0.0684	0.503	0.503	0.4347	0.5788	0.5685	0.4872	0.535	0.5144	1.2078	1.1949	1.1949	1.1949	0.4119	1.4501	0.5147	0.4119	0.4935	0.4935	0.6623	0.5509	0.5541	0.4409	1.2173
leuleu[c][e]	-0.1478	0.3538	0.3178	0.3178	0.3178	0.3323	0.3323	0.3425	0.3326	0.3178	0.3178	0.4855	0.2916	0.4506	0.3178	0.9059	0.2954	0.3495	1.5394	0.5471	0.5471	0.5471	0.5003	0.4812	0.5095	0.0692	0.502	0.502	0.4356	0.5781	0.5679	0.4881	0.534	0.5134	1.2073	1.1944	1.1944	1.1944	0.4114	1.4495	0.5137	0.4114	0.4928	0.4928	0.6617	0.5496	0.5528	0.4404	1.2168
leuleutrp[c][e]	0.1978	-2.983	-3.029	-3.029	-3.029	-3.029	-3.029	-3.029	-3.029	-3.029	-3.029	-3.029	-3.029	-3.029	-3.029	-3.029	-3.029	-3.029	-9.051	0.9018	0.9018	0.9018	0.9018	0.351	0.9018	-1.3756	0.9018	0.9018	-10.1548	0.9018	0.9018	-10.1023	0.9018	0.9018	0.881	0.8804	0.8804	0.8804	0.8804	0.8804	0.8804	0.8804	0.8804	0.8804	0.8804	0.8804	0.8804	0.8804	0.8804
leupro[c][e]	-0.1445	0.3542	0.3181	0.3181	0.3181	0.3326	0.3326	0.3429	0.3329	0.3185	0.3185	0.4854	0.2922	0.4505	0.3181	0.9057	0.296	0.3498	1.5425	0.5497	0.5497	0.5497	0.5029	0.4831	0.5121	0.056	0.5045	0.5045	0.4389	0.5811	0.5708	0.4914	0.5366	0.516	1.2096	1.1967	1.1967	1.1967	0.4136	1.4517	0.516	0.4136	0.495	0.495	0.6644	0.5522	0.5554	0.4426	1.219
leuproarg[c][e]	-0.1492	0.3533	0.3169	0.3169	0.3169	0.3317	0.3313	0.3416	0.3317	0.3173	0.3173	0.4849	0.2906	0.4501	0.3169	0.9052	0.2944	0.3486	1.5384	0.548	0.548	0.548	0.5014	0.4809	0.5105	0.0683	0.503	0.503	0.4347	0.5788	0.5685	0.4872	0.535	0.5144	1.2078	1.1949	1.1949	1.1949	0.4119	1.4501	0.5147	0.4119	0.4935	0.4935	0.6625	0.5509	0.5541	0.4409	1.2172
leusertrp[c][e]	-0.1492	0.3533	0.3169	0.3169	0.3169	0.3317	0.3313	0.3416	0.3317	0.3173	0.3173	0.4849	0.2906	0.4501	0.3169	0.9052	0.2944	0.3486	1.5384	0.548	0.548	0.548	0.5014	0.4809	0.5105	0.0688	0.503	0.503	0.4347	0.5788	0.5685	0.4872	0.535	0.5144	1.2078	1.1949	1.1949	1.1949	0.4119	1.4501	0.5147	0.4119	0.4935	0.4935	0.6625	0.5509	0.5541	0.4409	1.2174
leutrp[c][e]	-0.1477	0.353	0.3166	0.3166	0.3166	0.3314	0.3311	0.3417	0.3314	0.317	0.317	0.4844	0.2903	0.4498	0.3166	0.9047	0.2941	0.3487	1.5388	0.5485	0.5485	0.5485	0.5015	0.4814	0.5106	0.0666	0.5035	0.5035	0.4352	0.5792	0.569	0.4877	0.5355	0.5149	1.2083	1.1954	1.1954	1.1954	0.4124	1.4505	0.5149	0.4124	0.4939	0.4939	0.6627	0.551	0.5542	0.4413	1.2177
leutrparg[c][e]	-0.1492	0.3533	0.3169	0.3169	0.3169	0.3317	0.3313	0.3416	0.3317	0.3173	0.3173	0.4849	0.2906	0.4501	0.3169	0.9052	0.2944	0.3486	1.5385	0.548	0.548	0.548	0.5014	0.4809	0.5105	0.0683	0.503	0.503	0.4347	0.5788	0.5685	0.4872	0.535	0.5144	1.2078	1.1949	1.1949	1.1949	0.4119	1.4501	0.5147	0.4119	0.4935	0.4935	0.6625	0.5509	0.5541	0.4409	1.2174
leutyrtyr[c][e]	-0.1492	0.3529	0.3169	0.3169	0.3169	0.3313	0.3313	0.3416	0.3317	0.3173	0.3173	0.4849	0.2906	0.4501	0.3169	0.9052	0.2944	0.3486	1.5384	0.548	0.548	0.548	0.5014	0.4809	0.5105	0.0683	0.503	0.503	0.4347	0.5788	0.5685	0.4872	0.535	0.5144	1.2078	1.1949	1.1949	1.1949	0.4119	1.4501	0.5147	0.4119	0.4935	0.4935	0.6625	0.5509	0.5541	0.4409	1.2174
leuval[c][e]	-0.1492	0.3533	0.3169	0.3169	0.3169	0.3313	0.3313	0.3416	0.3317	0.3173	0.3173	0.4849	0.2906	0.4501	0.3169	0.9052	0.2944	0.3486	1.5384	0.548	0.548	0.548	0.5014	0.4809	0.5105	0.0683	0.503	0.503	0.4347	0.5788	0.5685	0.4872	0.535	0.5144	1.2078	1.1949	1.1949	1.1949	0.4119	1.4501	0.5147	0.4119	0.4935	0.4935	0.6625	0.5509	0.5541	0.4409	1.2174
Lfmkynr[c]	0	0	0	0	0	0	0	0	0	0	0	0	0	0	0	0	0	0	0	0	0	0	0	0	0	34.7327	0	0	0	0	0	0	0	0	0	0	0	0	0	0	0	0	0	0	0	0	0	0	0
lgnc[c][e][r]	1.3654	0.439	0.4414	0.4414	0.4414	0.4414	0.4414	0.4414	0.4414	0.4414	0.4414	0.4414	0.4414	0.4414	0.4414	0.4414	0.4414	0.4414	2.0067	0.6264	0.6264	0.6264	0.6264	0.8047	0.6264	0.6157	0.6264	0.6264	1.5315	0.6264	0.6264	1.8761	0.6264	0.6264	0.4975	0.4977	0.4977	0.4977	0.4977	0.4977	0.4977	0.4977	0.4977	0.4977	0.4977	0.4977	0.4977	0.4977	0.4977
lgt_S[c][m]	-0.144	0.3563	0.32	0.32	0.32	0.3348	0.3346	0.345	0.3348	0.3204	0.3204	0.4895	0.2938	0.4548	0.3203	0.9091	0.2978	0.3532	1.5008	0.5003	0.5003	0.5003	0.4557	0.4555	0.467	0.0747	0.4574	0.4574	0.3623	0.5251	0.5295	0.4681	0.4894	0.4694	1.2157	1.2028	1.2028	1.2028	0.4197	1.4578	0.5222	0.4197	0.5014	0.5014	0.6735	0.5591	0.5619	0.4488	1.2253
Lhcystin[c][e]	-0.1492	0.3529	0.3169	0.3169	0.3169	0.3313	0.3313	0.3416	0.3317	0.3169	0.3169	0.4849	0.2906	0.4501	0.3169	0.9052	0.2944	0.3486	1.5384	0.5477	0.5477	0.5477	0.501	0.4809	0.5102	0.0683	0.503	0.503	0.4347	0.5788	0.5685	0.4872	0.5347	0.5144	1.2078	1.1949	1.1949	1.1949	0.4119	1.4499	0.5144	0.4119	0.4935	0.4935	0.6625	0.5506	0.5537	0.4409	1.2172
lipoate[c][e]	-0.1492	0.3533	0.3169	0.3169	0.3169	0.3317	0.3313	0.3416	0.3317	0.3173	0.3173	0.4849	0.2906	0.4501	0.3169	0.9052	0.2944	0.3486	1.5384	0.548	0.548	0.548	0.5014	0.4809	0.5105	0.0688	0.503	0.503	0.4347	0.5788	0.5685	0.4872	0.535	0.5144	1.2078	1.1949	1.1949	1.1949	0.4119	1.4501	0.5147	0.4119	0.4935	0.4935	0.6625	0.5509	0.5541	0.4409	1.2174
Lkynr[c][e]	-0.0155	0.2553	0.2568	0.2568	0.2568	0.2568	0.2568	0.2568	0.2568	0.2568	0.2568	0.2568	0.2568	0.2568	0.2568	0.2568	0.2568	0.2568	1.7143	0.7598	0.7598	0.7598	0.7598	0.8591	0.7598	0.2171	0.7598	0.7598	1.3314	0.7598	0.7598	1.608	0.7598	0.7598	0.6824	0.6825	0.6825	0.6825	0.6825	0.6826	0.6825	0.6825	0.6825	0.6825	0.6825	0.6825	0.6825	0.6825	0.6825
lneldc[c][e][r]	-0.1492	0.3533	0.3169	0.3169	0.3169	0.3313	0.3313	0.3416	0.3317	0.3173	0.3173	0.4846	0.2906	0.4501	0.3169	0.9052	0.2944	0.3486	1.5384	0.548	0.548	0.548	0.501	0.4809	0.5102	0.0683	0.503	0.503	0.4347	0.5788	0.5685	0.4872	0.535	0.5144	1.2078	1.1949	1.1949	1.1949	0.4119	1.4501	0.5147	0.4119	0.4935	0.4935	0.6622	0.5509	0.5537	0.4409	1.2172
lneldccrn[c][e][m]	1.3658	0.439	0.4414	0.4414	0.4414	0.4414	0.4414	0.4414	0.4414	0.4414	0.4414	0.4414	0.4413	0.4414	0.4414	0.4415	0.4413	0.4414	2.0066	0.6266	0.6266	0.6266	0.6266	0.8048	0.6266	0.6156	0.6266	0.6266	1.5315	0.6266	0.6266	1.8761	0.6266	0.6266	0.4978	0.4981	0.4981	0.4981	0.4979	0.4982	0.4979	0.4979	0.4979	0.4979	0.4979	0.4979	0.4979	0.4979	0.4981
lnlc[c][e][l][r]	-8.82	-10.9969	-11.0333	-11.0333	-11.0333	-11.0186	-11.0189	-11.0083	-11.0186	-11.0331	-11.0331	-10.8676	-11.0593	-10.8991	-11.0334	-10.4453	-11.0556	-10.9995	-9.803	-10.8007	-10.8007	-10.8007	-10.8471	-10.8603	-10.838	-11.271	-10.8453	-10.8453	-10.9095	-10.77	-10.7801	-10.8535	-10.8135	-10.8339	-10.1418	-10.1547	-10.1547	-10.1547	-10.9379	-9.8996	-10.835	-10.9379	-10.8562	-10.8562	-10.6892	-10.7976	-10.7946	-10.909	-10.1324
lnlccoa[c][m][r][x]	-8.3713	-12.2276	-12.264	-12.264	-12.264	-12.2494	-12.2496	-12.2391	-12.2492	-12.2636	-12.2636	-12.096	-12.2903	-12.1309	-12.264	-11.6757	-12.2865	-12.2324	-11.0426	-12.033	-12.033	-12.033	-12.0797	-12.1	-12.0707	-12.5127	-12.0779	-12.0779	-12.1462	-12.0021	-12.0124	-12.0937	-12.0461	-12.0667	-11.3731	-11.386	-11.386	-11.386	-12.169	-11.1309	-12.0662	-12.169	-12.0874	-12.0874	-11.9184	-12.03	-12.0269	-12.14	-11.3635
lnlccrn[c][e][m][r][x]	-0.5794	-1.509	-1.5066	-1.5066	-1.5066	-1.5066	-1.5066	-1.5066	-1.5066	-1.5066	-1.5066	-1.5066	-1.5066	-1.5066	-1.5066	-1.5065	-1.5066	-1.5066	0.0587	-1.3214	-1.3214	-1.3214	-1.3214	-1.1431	-1.3214	-1.3323	-1.3214	-1.3214	-0.4164	-1.3214	-1.3214	-0.0719	-1.3214	-1.3214	-1.4502	-1.4499	-1.4499	-1.4499	-1.4501	-1.4498	-1.4501	-1.4501	-1.4501	-1.4501	-1.4501	-1.4501	-1.4501	-1.4501	-1.4499
lnlnca[c][e][l][r]	-0.1492	0.3533	0.3169	0.3169	0.3169	0.3313	0.3313	0.3416	0.3317	0.3173	0.3173	0.4849	0.2906	0.4501	0.3169	0.9052	0.2944	0.3486	1.5384	0.548	0.548	0.548	0.5014	0.4809	0.5102	0.0683	0.503	0.503	0.4347	0.5788	0.5685	0.4872	0.535	0.5144	1.2078	1.1949	1.1949	1.1949	0.4119	1.4501	0.5147	0.4119	0.4935	0.4935	0.6625	0.5509	0.5541	0.4409	1.2172
lnlncacoa[c][m][r]	0.8709	0.3522	0.3157	0.3157	0.3157	0.3304	0.3301	0.3406	0.3304	0.316	0.316	0.4837	0.2895	0.4489	0.3157	0.9044	0.2933	0.3474	1.7889	0.9687	0.9687	0.9687	0.9263	0.9171	0.9346	0.068	0.9279	0.9279	0.9417	0.9969	0.9875	1.0312	0.9569	0.9382	1.5259	1.5545	1.5545	1.5545	0.8329	1.7937	0.9267	0.8329	0.9073	0.9073	1.0622	0.9598	0.9626	0.8592	1.5753
lnlncacrn[c][m]	26.8832	0	14.2878	14.2878	14.2878	14.2878	14.2878	14.2878	14.2878	14.2878	14.2878	15.2877	14.2878	15.2877	14.2878	17.4576	14.2878	14.2878	26.4196	26.1886	26.1886	26.1886	26.1569	26.1734	26.1631	17.6096	26.1581	26.1581	26.3535	26.2099	26.2028	26.5132	26.1795	26.1658	26.4371	26.604	26.604	26.604	26.053	26.793	26.1242	26.053	26.1095	26.1095	26.2288	26.1496	26.1515	26.0728	26.6203
lnlncg[c][e][l][r]	-25.8992	0.3487	0.3096	0.3096	0.3096	0.3244	0.3244	0.3347	0.3244	0.31	0.31	0.4776	0.2837	0.4431	0.31	0.9017	0.2875	0.3416	1.5337	0.5432	0.5432	0.5432	0.4961	0.4742	0.5052	0.0614	0.4977	0.4977	0.4278	0.5739	0.5639	0.4799	0.5301	0.5092	1.2007	1.1908	1.1908	1.1908	0.4046	1.4455	0.5075	0.4046	0.4862	0.4862	0.6553	0.5436	0.5468	0.4336	1.2133
lnlncgcoa[c][m][r][x]	-7.312	-3.5529	-3.0578	-3.0578	-3.0578	-3.0574	-3.0574	-3.0572	-3.0574	-3.0578	-3.0578	-3.0535	-3.0584	-3.0544	-3.0578	-3.0402	-3.0583	-3.057	-5.1456	-4.7555	-4.7555	-4.7555	-4.762	-4.6879	-4.7607	-2.3926	-4.7617	-4.7617	-4.2182	-4.7513	-4.7527	-3.9429	-4.7573	-4.7601	-5.0548	-4.6989	-4.6989	-4.6989	-4.8901	-4.5877	-4.8765	-4.8901	-4.8792	-4.8792	-4.8605	-4.8722	-4.8718	-4.8862	-4.6901
lnlncgcrn[c][m][r]	-5.2398	-3.5069	-3.0268	-3.0268	-3.0268	-3.0261	-3.0261	-3.0256	-3.0261	-3.0268	-3.0268	-3.0184	-3.028	-3.0203	-3.0268	-2.993	-3.0278	-3.0253	-4.7599	-4.4827	-4.4827	-4.4827	-4.4907	-4.4199	-4.4891	-2.3776	-4.4904	-4.4904	-3.9626	-4.4773	-4.4791	-3.6897	-4.4849	-4.4884	-4.708	-4.3876	-4.3876	-4.3876	-4.6173	-4.2633	-4.6	-4.6173	-4.6035	-4.6035	-4.5769	-4.594	-4.5935	-4.6124	-4.3775
lpam[c][e][m]	0.0281	0.0541	0.054	0.054	0.054	0.0541	0.0541	0.0541	0.0541	0.054	0.054	0.0542	0.054	0.0541	0.054	0.0545	0.054	0.0541	0.0552	0.0542	0.0542	0.0542	0.0542	0.0541	0.0542	0.0539	0.0542	0.0542	0.0541	0.0542	0.0542	0.0542	0.0542	0.0542	0.0548	0.0548	0.0548	0.0548	0.0541	0.0551	0.0542	0.0541	0.0542	0.0542	0.0543	0.0542	0.0542	0.0541	0.0548
lpchol_hs[c][e]	-0.1492	0.3533	0.3169	0.3169	0.3169	0.3317	0.3313	0.3416	0.3317	0.3173	0.3173	0.4849	0.2906	0.4501	0.3169	0.9052	0.2944	0.3486	1.5385	0.548	0.548	0.548	0.5014	0.4809	0.5105	0.0688	0.503	0.503	0.4347	0.5788	0.5685	0.4872	0.535	0.5144	1.2078	1.1951	1.1951	1.1951	0.4119	1.4501	0.5147	0.4119	0.4935	0.4935	0.6625	0.5509	0.5541	0.4409	1.2174
lstn[c][e][r]	-0.1893	0.167	0.1678	0.1678	0.1678	0.1678	0.1678	0.1678	0.1678	0.1678	0.1678	0.1678	0.1678	0.1678	0.1678	0.1679	0.1678	0.1678	1.7445	0.8318	0.8318	0.8318	0.8318	0.921	0.8318	-0.1545	0.8318	0.8318	1.359	0.8318	0.8318	1.6322	0.8318	0.8318	0.7516	0.7517	0.7517	0.7517	0.7516	0.7517	0.7516	0.7516	0.7516	0.7516	0.7516	0.7516	0.7516	0.7516	0.7517
lstnm7[c][e][r]	-0.1893	0.167	0.1678	0.1678	0.1678	0.1678	0.1678	0.1678	0.1678	0.1678	0.1678	0.1678	0.1678	0.1678	0.1678	0.1679	0.1678	0.1678	1.7445	0.8318	0.8318	0.8318	0.8318	0.921	0.8318	-0.1545	0.8318	0.8318	1.359	0.8318	0.8318	1.6322	0.8318	0.8318	0.7516	0.7517	0.7517	0.7517	0.7516	0.7517	0.7516	0.7516	0.7516	0.7516	0.7516	0.7516	0.7516	0.7516	0.7517
lthstrl[c][e][r]	1.0747	0.713	0.7026	0.7026	0.7026	0.7027	0.7027	0.7025	0.7027	0.7026	0.7026	0.7028	0.7026	0.7027	0.7026	0.7031	0.7026	0.7027	-8.3538	-4.6929	-4.6929	-4.6929	-4.6945	-9.413	-4.7035	1.7232	-4.6944	-4.6944	-9.4586	-4.6919	-4.6923	-9.4052	-4.6934	-4.694	-2.5348	-2.5852	-2.5852	-2.5852	-2.5925	-2.5818	-2.5939	-2.5925	-2.5919	-2.5919	-2.5905	-2.5914	-2.5914	-2.5923	-2.5849
lys_L[c][e][m][n]	0.4669	0.1901	0.1909	0.1909	0.1909	0.1909	0.1909	0.1909	0.1909	0.1909	0.1909	0.191	0.1909	0.191	0.1909	0.1914	0.1909	0.1909	1.0977	0.5229	0.5229	0.5229	0.5228	0.5846	0.5228	0.1447	0.5228	0.5228	0.8868	0.5229	0.5229	1.0359	0.5229	0.5229	0.4817	0.4817	0.4817	0.4817	0.4811	0.482	0.4812	0.4811	0.4812	0.4812	0.4813	0.4812	0.4812	0.4811	0.4817
lysargleu[c][e]	-0.1492	0.3533	0.3169	0.3169	0.3169	0.3317	0.3313	0.3416	0.3317	0.3173	0.3173	0.4849	0.2906	0.4501	0.3169	0.9052	0.2944	0.3486	1.5384	0.548	0.548	0.548	0.5014	0.4809	0.5105	0.0683	0.503	0.503	0.4347	0.5788	0.5685	0.4872	0.535	0.5144	1.2078	1.1949	1.1949	1.1949	0.4119	1.4501	0.5147	0.4119	0.4935	0.4935	0.6625	0.5509	0.5541	0.4409	1.2174
lyscyshis[c][e]	-0.1488	0.3526	0.3163	0.3163	0.3163	0.3311	0.3311	0.3414	0.3311	0.3166	0.3166	0.4844	0.2903	0.4495	0.3163	0.9047	0.2941	0.3483	1.539	0.5485	0.5485	0.5485	0.5018	0.4814	0.511	0.0683	0.5035	0.5035	0.4352	0.5792	0.569	0.4877	0.5355	0.5149	1.2083	1.1956	1.1956	1.1956	0.4124	1.4505	0.5152	0.4124	0.4939	0.4939	0.663	0.5514	0.5545	0.4413	1.2179
lysglnphe[c][e]	-0.1492	0.3533	0.3169	0.3169	0.3169	0.3313	0.3313	0.3416	0.3317	0.3173	0.3173	0.4849	0.2906	0.4501	0.3169	0.9052	0.2944	0.3486	1.5384	0.548	0.548	0.548	0.5014	0.4809	0.5105	0.0688	0.503	0.503	0.4347	0.5788	0.5685	0.4872	0.535	0.5144	1.2078	1.1949	1.1949	1.1949	0.4119	1.4501	0.5147	0.4119	0.4935	0.4935	0.6625	0.5509	0.5541	0.4409	1.2172
lysgluglu[c][e]	-0.1492	0.3533	0.3169	0.3169	0.3169	0.3317	0.3313	0.3416	0.3317	0.3173	0.3173	0.4849	0.2906	0.4501	0.3169	0.9052	0.2944	0.3486	1.5384	0.548	0.548	0.548	0.5014	0.4809	0.5105	0.0688	0.503	0.503	0.4347	0.5788	0.5685	0.4872	0.535	0.5144	1.2078	1.1949	1.1949	1.1949	0.4119	1.4501	0.5147	0.4119	0.4935	0.4935	0.6625	0.5509	0.5541	0.4409	1.2174
lyslyslys[c][e]	-0.1492	0.3533	0.3169	0.3169	0.3169	0.3313	0.3313	0.3416	0.3317	0.3173	0.3173	0.4849	0.2906	0.4501	0.3169	0.9052	0.2944	0.3486	1.5385	0.548	0.548	0.548	0.5014	0.4809	0.5105	0.0683	0.503	0.503	0.4347	0.5788	0.5685	0.4872	0.535	0.5144	1.2078	1.1949	1.1949	1.1949	0.4119	1.4501	0.5147	0.4119	0.4935	0.4935	0.6625	0.5509	0.5541	0.4409	1.2174
lyspheile[c][e]	1.0597	0.9647	0.9662	0.9662	0.9662	0.9662	0.9662	0.9662	0.9662	0.9662	0.9662	0.9662	0.9662	0.9662	0.9662	0.9662	0.9662	0.9662	-9.0251	-10.0189	-10.0189	-10.0189	-10.0654	-10.0886	-10.0566	0.2717	-10.0638	-10.0638	-10.1378	-9.9887	-9.999	-10.0786	-10.032	-10.0523	-9.3657	-9.3783	-9.3783	-9.3783	-10.1615	-9.1231	-10.0585	-10.1615	-10.0796	-10.0796	-9.9108	-10.0224	-10.0192	-10.1323	-9.356
lystrparg[c][e]	-0.1492	0.3533	0.3169	0.3169	0.3169	0.3317	0.3313	0.3416	0.3317	0.3173	0.3173	0.4849	0.2906	0.4501	0.3169	0.9052	0.2944	0.3486	1.5384	0.548	0.548	0.548	0.5014	0.4809	0.5105	0.0683	0.503	0.503	0.4347	0.5788	0.5685	0.4872	0.535	0.5144	1.2078	1.1949	1.1949	1.1949	0.4119	1.4501	0.5147	0.4119	0.4935	0.4935	0.6625	0.5509	0.5541	0.4409	1.2174
lystyrile[c][e]	-0.1492	0.3529	0.3165	0.3165	0.3165	0.3313	0.3313	0.3416	0.3313	0.3169	0.3169	0.4846	0.2906	0.4501	0.3165	0.905	0.2944	0.3486	1.5385	0.548	0.548	0.548	0.5014	0.4809	0.5105	0.0683	0.503	0.503	0.4347	0.5788	0.5685	0.4872	0.535	0.5144	1.2078	1.1951	1.1951	1.1951	0.4119	1.4501	0.5147	0.4119	0.4935	0.4935	0.6625	0.5509	0.5541	0.4409	1.2174
lysvalphe[c][e]	-0.1492	0.3533	0.3169	0.3169	0.3169	0.3313	0.3313	0.3416	0.3317	0.3173	0.3173	0.4849	0.2906	0.4501	0.3169	0.9052	0.2944	0.3486	1.5384	0.548	0.548	0.548	0.5014	0.4809	0.5105	0.0683	0.503	0.503	0.4347	0.5788	0.5685	0.4872	0.535	0.5144	1.2078	1.1949	1.1949	1.1949	0.4119	1.4501	0.5147	0.4119	0.4935	0.4935	0.6625	0.5509	0.5541	0.4409	1.2174
lysvaltrp[c][e]	-0.1492	0.3533	0.3169	0.3169	0.3169	0.3317	0.3313	0.3416	0.3317	0.3173	0.3173	0.4849	0.2906	0.4501	0.3169	0.9052	0.2944	0.3486	1.5385	0.548	0.548	0.548	0.5014	0.4809	0.5105	0.0688	0.503	0.503	0.4347	0.5788	0.5685	0.4872	0.535	0.5144	1.2078	1.1949	1.1949	1.1949	0.4119	1.4501	0.5147	0.4119	0.4935	0.4935	0.6625	0.5509	0.5541	0.4409	1.2174
M00004[c][m][r]	-0.1492	0.3533	0.3169	0.3169	0.3169	0.3317	0.3313	0.3416	0.3317	0.3173	0.3173	0.4849	0.2906	0.4501	0.3169	0.9052	0.2944	0.3486	1.5384	0.548	0.548	0.548	0.5014	0.4809	0.5105	0.0688	0.503	0.503	0.4347	0.5788	0.5685	0.4872	0.535	0.5144	1.2078	1.1951	1.1951	1.1951	0.4119	1.4501	0.5147	0.4119	0.4935	0.4935	0.6625	0.5509	0.5541	0.4409	1.2174
M00006[c][m][r]	-0.1492	0.3533	0.3169	0.3169	0.3169	0.3317	0.3313	0.3416	0.3317	0.3173	0.3173	0.4849	0.2906	0.4501	0.3169	0.9052	0.2944	0.3486	1.5384	0.548	0.548	0.548	0.5014	0.4809	0.5105	0.0683	0.503	0.503	0.4347	0.5788	0.5685	0.4872	0.535	0.5144	1.208	1.1951	1.1951	1.1951	0.4119	1.4501	0.5147	0.4119	0.4935	0.4935	0.6625	0.5509	0.5541	0.4409	1.2174
M00011[c][m]	-0.1492	0.3533	0.3169	0.3169	0.3169	0.3317	0.3313	0.3416	0.3317	0.3173	0.3173	0.4849	0.2906	0.4501	0.3169	0.9052	0.2944	0.3486	1.5384	0.548	0.548	0.548	0.5014	0.4809	0.5105	0.0688	0.503	0.503	0.4347	0.5788	0.5685	0.4872	0.535	0.5144	1.2078	1.1949	1.1949	1.1949	0.4119	1.4501	0.5147	0.4119	0.4935	0.4935	0.6625	0.5509	0.5541	0.4409	1.2174
M00012[c][m][r]	-0.1492	0.3533	0.3169	0.3169	0.3169	0.3317	0.3313	0.3416	0.3317	0.3173	0.3173	0.4849	0.2906	0.4501	0.3169	0.9052	0.2944	0.3486	1.5384	0.548	0.548	0.548	0.5014	0.4809	0.5105	0.0688	0.503	0.503	0.4347	0.5788	0.5685	0.4872	0.535	0.5144	1.2078	1.1949	1.1949	1.1949	0.4119	1.4501	0.5147	0.4119	0.4935	0.4935	0.6625	0.5509	0.5541	0.4409	1.2174
M00018[c][m][r]	-0.1492	0.3533	0.3169	0.3169	0.3169	0.3317	0.3317	0.342	0.3317	0.3173	0.3173	0.4849	0.291	0.4501	0.3169	0.9052	0.2948	0.3489	1.5384	0.548	0.548	0.548	0.501	0.4806	0.5102	0.0683	0.503	0.503	0.4347	0.5788	0.5685	0.4872	0.535	0.5144	1.2082	1.1953	1.1953	1.1953	0.4123	1.4504	0.515	0.4123	0.4938	0.4938	0.6628	0.5512	0.5544	0.4412	1.2178
M00020[c][m][r]	-0.1492	0.3533	0.3169	0.3169	0.3169	0.3315	0.3313	0.3416	0.3317	0.3173	0.3173	0.4849	0.2906	0.4501	0.3169	0.9052	0.2944	0.3486	1.5384	0.548	0.548	0.548	0.5012	0.4809	0.5103	0.0683	0.503	0.503	0.4347	0.5788	0.5685	0.4872	0.535	0.5144	1.2078	1.1949	1.1949	1.1949	0.4119	1.4501	0.5147	0.4119	0.4935	0.4935	0.6625	0.5509	0.5541	0.4409	1.2173
M00022[c][m]	-0.1492	0.3533	0.3169	0.3169	0.3169	0.3317	0.3313	0.3416	0.3317	0.3173	0.3173	0.4849	0.2906	0.4501	0.3169	0.9052	0.2944	0.3486	1.5384	0.548	0.548	0.548	0.5014	0.4809	0.5105	0.0683	0.503	0.503	0.4347	0.5788	0.5685	0.4872	0.535	0.5144	1.2078	1.1949	1.1949	1.1949	0.4119	1.4501	0.5147	0.4119	0.4935	0.4935	0.6625	0.5509	0.5541	0.4409	1.2174
M00023[c][m][r]	-0.1492	0.3533	0.3169	0.3169	0.3169	0.3317	0.3313	0.3416	0.3317	0.3173	0.3173	0.4849	0.2906	0.4501	0.3169	0.9052	0.2944	0.3486	1.5384	0.548	0.548	0.548	0.5014	0.4809	0.5105	0.0683	0.503	0.503	0.4347	0.5788	0.5685	0.4872	0.535	0.5144	1.2078	1.1949	1.1949	1.1949	0.4119	1.4501	0.5147	0.4119	0.4935	0.4935	0.6625	0.5509	0.5541	0.4409	1.2174
M00100[c][m]	-0.1492	0.3533	0.3169	0.3169	0.3169	0.3317	0.3313	0.3416	0.3317	0.3173	0.3173	0.4849	0.2906	0.4501	0.3169	0.9052	0.2944	0.3486	1.5384	0.548	0.548	0.548	0.5014	0.4809	0.5105	0.0688	0.503	0.503	0.4347	0.5788	0.5685	0.4872	0.535	0.5144	1.208	1.1951	1.1951	1.1951	0.4119	1.4501	0.5147	0.4119	0.4935	0.4935	0.6625	0.5509	0.5541	0.4409	1.2174
M00101[c][m][r]	-0.1492	0.3533	0.3169	0.3169	0.3169	0.3317	0.3313	0.3416	0.3317	0.3173	0.3173	0.4849	0.2906	0.4501	0.3169	0.9052	0.2944	0.3486	1.5384	0.548	0.548	0.548	0.5014	0.4809	0.5105	0.0688	0.503	0.503	0.4347	0.5788	0.5685	0.4872	0.535	0.5144	1.208	1.1951	1.1951	1.1951	0.4119	1.4501	0.5147	0.4119	0.4935	0.4935	0.6625	0.5509	0.5541	0.4409	1.2174
M00116[c][m]	-0.1492	0.3529	0.3169	0.3169	0.3169	0.3313	0.3313	0.3416	0.3317	0.3173	0.3173	0.4849	0.2906	0.4501	0.3169	0.9052	0.2944	0.3486	1.5384	0.548	0.548	0.548	0.501	0.4809	0.5102	0.0683	0.503	0.503	0.4347	0.5788	0.5685	0.4872	0.5347	0.5144	1.2078	1.1949	1.1949	1.1949	0.4119	1.4499	0.5147	0.4119	0.4935	0.4935	0.6625	0.5509	0.5537	0.4409	1.2172
M00122[c][m]	-0.1492	0.3533	0.3169	0.3169	0.3169	0.3317	0.3313	0.3416	0.3317	0.3173	0.3173	0.4849	0.2906	0.4501	0.3169	0.9052	0.2944	0.3486	1.5384	0.548	0.548	0.548	0.5014	0.4809	0.5105	0.0688	0.503	0.503	0.4347	0.5788	0.5685	0.4872	0.535	0.5144	1.2078	1.1949	1.1949	1.1949	0.4119	1.4501	0.5147	0.4119	0.4935	0.4935	0.6625	0.5509	0.5541	0.4409	1.2174
M00123[c][m][r]	-0.1492	0.3533	0.3169	0.3169	0.3169	0.3317	0.3313	0.3416	0.3317	0.3173	0.3173	0.4849	0.2906	0.4501	0.3169	0.9052	0.2944	0.3486	1.5384	0.548	0.548	0.548	0.5014	0.4809	0.5105	0.0688	0.503	0.503	0.4347	0.5788	0.5685	0.4872	0.535	0.5144	1.2078	1.1949	1.1949	1.1949	0.4119	1.4501	0.5147	0.4119	0.4935	0.4935	0.6625	0.5509	0.5541	0.4409	1.2174
M00127[c][m][r]	-0.1492	0.3533	0.3169	0.3169	0.3169	0.3313	0.3313	0.3416	0.3317	0.3173	0.3173	0.4847	0.2906	0.4501	0.3169	0.9052	0.2944	0.3486	1.5383	0.5479	0.5479	0.5479	0.501	0.4808	0.5102	0.0683	0.5028	0.5028	0.4347	0.5786	0.5683	0.487	0.5348	0.5142	1.2078	1.1949	1.1949	1.1949	0.4119	1.4501	0.5147	0.4119	0.4935	0.4935	0.6624	0.5509	0.5537	0.4409	1.2172
M00129[c][m][r]	-0.1492	0.3531	0.3169	0.3169	0.3169	0.3315	0.3313	0.3416	0.3317	0.3171	0.3171	0.4847	0.2906	0.4501	0.3169	0.9052	0.2944	0.3486	1.5384	0.5479	0.5479	0.5479	0.5012	0.4809	0.5103	0.0683	0.503	0.503	0.4347	0.5788	0.5685	0.4872	0.5348	0.5142	1.2079	1.195	1.195	1.195	0.4119	1.45	0.5146	0.4119	0.4935	0.4935	0.6624	0.5507	0.5539	0.4409	1.2173
M00261[c][m]	-0.1492	0.3533	0.3169	0.3169	0.3169	0.3313	0.3313	0.3416	0.3317	0.3173	0.3173	0.4849	0.2906	0.4501	0.3169	0.9052	0.2944	0.3486	1.5384	0.548	0.548	0.548	0.5014	0.4809	0.5102	0.0683	0.503	0.503	0.4347	0.5788	0.5685	0.4872	0.535	0.5144	1.2078	1.1949	1.1949	1.1949	0.4119	1.4501	0.5147	0.4119	0.4935	0.4935	0.6625	0.5509	0.5541	0.4409	1.2174
M00263[c][m]	-0.1492	0.3533	0.3169	0.3169	0.3169	0.3313	0.3313	0.3416	0.3317	0.3173	0.3173	0.4849	0.2906	0.4501	0.3169	0.9052	0.2944	0.3486	1.5384	0.548	0.548	0.548	0.501	0.4809	0.5102	0.0683	0.503	0.503	0.4347	0.5788	0.5685	0.4872	0.535	0.5144	1.2078	1.1949	1.1949	1.1949	0.4119	1.4501	0.5147	0.4119	0.4935	0.4935	0.6625	0.5509	0.5541	0.4409	1.2172
M00342[c][m]	-0.1492	0.3533	0.3169	0.3169	0.3169	0.3317	0.3313	0.3416	0.3317	0.3173	0.3173	0.4849	0.2906	0.4501	0.3169	0.9052	0.2944	0.3486	1.5385	0.548	0.548	0.548	0.5014	0.4809	0.5105	0.0688	0.503	0.503	0.4347	0.5788	0.5685	0.4872	0.535	0.5144	1.208	1.1951	1.1951	1.1951	0.4119	1.4501	0.5147	0.4119	0.4935	0.4935	0.6625	0.5509	0.5541	0.4409	1.2174
M00343[c][m][r]	-0.1492	0.3533	0.3169	0.3169	0.3169	0.3317	0.3313	0.3416	0.3317	0.3173	0.3173	0.4849	0.2906	0.4501	0.3169	0.9052	0.2944	0.3486	1.5385	0.548	0.548	0.548	0.5014	0.4809	0.5105	0.0688	0.503	0.503	0.4347	0.5788	0.5685	0.4872	0.535	0.5144	1.208	1.1951	1.1951	1.1951	0.4119	1.4501	0.5147	0.4119	0.4935	0.4935	0.6625	0.5509	0.5541	0.4409	1.2174
M01141[c][m][r][x]	-0.1492	0.3533	0.3169	0.3169	0.3169	0.3317	0.3313	0.3416	0.3317	0.3173	0.3173	0.4849	0.2906	0.4501	0.3169	0.9052	0.2944	0.3486	1.5384	0.548	0.548	0.548	0.501	0.4809	0.5102	0.0683	0.503	0.503	0.4347	0.5788	0.5685	0.4872	0.535	0.5144	1.2078	1.1949	1.1949	1.1949	0.4119	1.4501	0.5147	0.4119	0.4935	0.4935	0.6625	0.5509	0.5541	0.4409	1.2174
M01191[c][m][r][x]	-0.1492	0.3533	0.3169	0.3169	0.3169	0.3315	0.3313	0.3416	0.3317	0.3173	0.3173	0.4849	0.2906	0.4501	0.3169	0.9052	0.2944	0.3486	1.5384	0.548	0.548	0.548	0.5014	0.4809	0.5105	0.0688	0.503	0.503	0.4347	0.5788	0.5685	0.4872	0.535	0.5144	1.2078	1.1949	1.1949	1.1949	0.4119	1.4501	0.5147	0.4119	0.4935	0.4935	0.6625	0.5509	0.5541	0.4409	1.2173
M01236[c][m][r]	-0.1492	0.3533	0.3169	0.3169	0.3169	0.3317	0.3313	0.3416	0.3317	0.3173	0.3173	0.4849	0.2906	0.4501	0.3169	0.9052	0.2944	0.3486	1.5384	0.548	0.548	0.548	0.5014	0.4809	0.5102	0.0683	0.503	0.503	0.4347	0.5788	0.5685	0.4872	0.535	0.5144	1.2078	1.1949	1.1949	1.1949	0.4119	1.4501	0.5147	0.4119	0.4935	0.4935	0.6625	0.5509	0.5541	0.4409	1.2174
M01237[c][m][r]	-0.1492	0.3533	0.3169	0.3169	0.3169	0.3317	0.3313	0.3416	0.3317	0.3173	0.3173	0.4849	0.2906	0.4501	0.3169	0.9052	0.2944	0.3486	1.5384	0.548	0.548	0.548	0.5014	0.4809	0.5105	0.0688	0.503	0.503	0.4347	0.5788	0.5685	0.4872	0.535	0.5144	1.2078	1.1951	1.1951	1.1951	0.4119	1.4501	0.5147	0.4119	0.4935	0.4935	0.6625	0.5509	0.5541	0.4409	1.2174
M01389[c]	-0.0267	0	0	0	0	0	0	0	0	0	0	0	0	0	0	0	0	0	3.8865	0.4974	0.4974	0.4974	0.4974	1.4166	0.4974	0	0.4974	0.4974	3.1524	0.4974	0.4974	3.7072	0.4974	0.4974	-10.5398	-10.5524	-10.5524	-10.5524	-11.3354	-10.2973	-11.2326	-11.3354	-11.2538	-11.2538	-11.0858	-11.1952	-11.1921	-11.3064	-10.5299
M01473[r]	0	0	0	0	0	0	0	0	0	0	0	0	0	0	0	0	0	0	0	0	0	0	0	0	0	0	0	0	0	0	0	0	0	0	0	0	0	0	0	0	0	0	0	0	0	0	0	0	0
M01491[r]	-35.2385	-0.1118	-0.1173	-0.1173	-0.1173	-0.1173	-0.1173	-0.1173	-0.1173	-0.1173	-0.1173	-0.1173	-0.1173	-0.1173	-0.1173	-0.1173	-0.1173	-0.1173	0.2357	0.5159	0.5159	0.5159	0.5159	0.4327	0.5159	0.2786	0.5159	0.5159	0.2595	0.5159	0.5159	0.2269	0.5159	0.5159	0.5827	0.5829	0.5829	0.5829	0.5829	0.5829	0.5829	0.5829	0.5829	0.5829	0.5829	0.5829	0.5829	0.5829	0.5829
M01724[c][m][r]	-8.6898	-0.1111	-0.1167	-0.1167	-0.1167	-0.1167	-0.1167	-0.1167	-0.1167	-0.1167	-0.1167	-0.1165	-0.1168	-0.1165	-0.1167	-0.1156	-0.1168	-0.1167	0.2382	0.5159	0.5159	0.5159	0.5158	0.4328	0.5158	0.2784	0.5158	0.5158	0.2597	0.5159	0.5159	0.2273	0.5159	0.5158	0.5836	0.5838	0.5838	0.5838	0.5827	0.5843	0.5828	0.5827	0.5828	0.5828	0.583	0.5829	0.5829	0.5828	0.5838
M01726[c][m]	-0.1492	0.3533	0.3169	0.3169	0.3169	0.3317	0.3313	0.3416	0.3317	0.3173	0.3173	0.4849	0.2906	0.4501	0.3169	0.9052	0.2944	0.3486	1.5384	0.548	0.548	0.548	0.5014	0.4809	0.5105	0.0683	0.503	0.503	0.4347	0.5788	0.5685	0.4872	0.535	0.5144	1.208	1.1951	1.1951	1.1951	0.4119	1.4501	0.5147	0.4119	0.4935	0.4935	0.6625	0.5509	0.5541	0.4409	1.2174
M01727[c][m]	-0.1492	0.3533	0.3169	0.3169	0.3169	0.3317	0.3313	0.3416	0.3317	0.3173	0.3173	0.4846	0.2906	0.4501	0.3169	0.9052	0.2944	0.3486	1.5382	0.5477	0.5477	0.5477	0.501	0.4806	0.5102	0.0683	0.5027	0.5027	0.4347	0.5785	0.5682	0.4869	0.5347	0.5141	1.208	1.1951	1.1951	1.1951	0.4119	1.4501	0.5147	0.4119	0.4935	0.4935	0.6625	0.5509	0.5541	0.4409	1.2174
M01729[c][m]	3.8104	0.3523	0.3164	0.3164	0.3164	0.3308	0.3308	0.3411	0.3312	0.3167	0.3167	0.4833	0.2901	0.4488	0.3164	0.9038	0.2939	0.3476	1.5376	0.5478	0.5478	0.5478	0.5008	0.4797	0.5099	0.0669	0.5027	0.5027	0.4338	0.5782	0.5682	0.4863	0.5347	0.5141	1.2079	1.195	1.195	1.195	0.412	1.4501	0.5148	0.412	0.4935	0.4935	0.6622	0.5509	0.5541	0.441	1.2175
M01770[c][m]	-0.1492	0.3529	0.3169	0.3169	0.3169	0.3313	0.3313	0.3416	0.3317	0.3173	0.3173	0.4849	0.2906	0.4501	0.3169	0.9052	0.2944	0.3486	1.5384	0.548	0.548	0.548	0.501	0.4809	0.5102	0.0683	0.503	0.503	0.4347	0.5788	0.5685	0.4872	0.535	0.5144	1.2078	1.1949	1.1949	1.1949	0.4119	1.4499	0.5147	0.4119	0.4935	0.4935	0.6625	0.5509	0.5537	0.4409	1.2172
M01775[c][m]	-0.1492	0.3533	0.3169	0.3169	0.3169	0.3317	0.3313	0.3416	0.3317	0.3173	0.3173	0.4849	0.2906	0.4501	0.3169	0.9052	0.2944	0.3486	1.5384	0.548	0.548	0.548	0.5014	0.4809	0.5102	0.0683	0.503	0.503	0.4347	0.5788	0.5685	0.4872	0.535	0.5144	1.2078	1.1949	1.1949	1.1949	0.4119	1.4501	0.5147	0.4119	0.4935	0.4935	0.6625	0.5509	0.5541	0.4409	1.2174
M01776[c][m]	-0.1492	0.3533	0.3169	0.3169	0.3169	0.3317	0.3317	0.342	0.3317	0.3173	0.3173	0.4849	0.291	0.4501	0.3169	0.9052	0.2948	0.3489	1.5384	0.548	0.548	0.548	0.501	0.4806	0.5102	0.0683	0.503	0.503	0.4347	0.5788	0.5685	0.4872	0.535	0.5144	1.2082	1.1953	1.1953	1.1953	0.4123	1.4504	0.515	0.4123	0.4938	0.4938	0.6628	0.5512	0.5544	0.4412	1.2178
M01777[c][m]	-0.1492	0.3533	0.3169	0.3169	0.3169	0.3313	0.3313	0.3416	0.3317	0.3173	0.3173	0.4849	0.2906	0.4501	0.3169	0.9052	0.2944	0.3486	1.5384	0.548	0.548	0.548	0.5014	0.4809	0.5105	0.0688	0.503	0.503	0.4347	0.5788	0.5685	0.4872	0.535	0.5144	1.2078	1.1949	1.1949	1.1949	0.4119	1.4501	0.5147	0.4119	0.4935	0.4935	0.6625	0.5509	0.5541	0.4409	1.2174
M01881[c][e]	-0.1492	0.3533	0.3169	0.3169	0.3169	0.3313	0.3313	0.3416	0.3317	0.3173	0.3173	0.4849	0.2906	0.4501	0.3169	0.9052	0.2944	0.3486	1.5384	0.548	0.548	0.548	0.5014	0.4809	0.5102	0.0688	0.503	0.503	0.4347	0.5788	0.5685	0.4872	0.535	0.5144	1.2078	1.1949	1.1949	1.1949	0.4119	1.4501	0.5147	0.4119	0.4935	0.4935	0.6625	0.5509	0.5541	0.4409	1.2172
M01989[c][e]	-0.1488	0.3539	0.3178	0.3175	0.3178	0.3323	0.3322	0.3426	0.3325	0.3179	0.3179	0.4854	0.2915	0.4505	0.3178	0.9058	0.2953	0.3495	1.5388	0.5484	0.5484	0.5484	0.5017	0.4813	0.5108	0.0688	0.5035	0.5035	0.4351	0.5792	0.569	0.4876	0.5354	0.5147	1.209	1.1961	1.1961	1.1961	0.4131	1.4511	0.5159	0.4131	0.4946	0.4946	0.6636	0.552	0.5552	0.442	1.2185
M02051[c][m]	-0.1492	0.3533	0.3169	0.3169	0.3169	0.3317	0.3317	0.342	0.3317	0.3173	0.3173	0.4849	0.291	0.4501	0.3169	0.9052	0.2948	0.3489	1.5384	0.5477	0.5477	0.5477	0.501	0.4806	0.5102	0.0683	0.503	0.503	0.4347	0.5788	0.5685	0.4869	0.5347	0.5141	1.2082	1.1953	1.1953	1.1953	0.4123	1.4504	0.515	0.4123	0.4938	0.4938	0.6628	0.5512	0.5544	0.4412	1.2176
M02052[c][m][r]	-0.1492	0.3533	0.3169	0.3169	0.3169	0.3317	0.3317	0.342	0.3317	0.3173	0.3173	0.4849	0.291	0.4501	0.3169	0.9052	0.2948	0.3489	1.5384	0.5477	0.5477	0.5477	0.501	0.4806	0.5102	0.0683	0.503	0.503	0.4347	0.5788	0.5685	0.4869	0.5347	0.5141	1.2082	1.1953	1.1953	1.1953	0.4123	1.4504	0.515	0.4123	0.4938	0.4938	0.6628	0.5512	0.5544	0.4412	1.2176
M02102[c][m]	-0.1492	0.3533	0.3169	0.3169	0.3169	0.3317	0.3313	0.3416	0.3317	0.3173	0.3173	0.4849	0.2906	0.4501	0.3169	0.9052	0.2944	0.3486	1.5384	0.548	0.548	0.548	0.5014	0.4809	0.5105	0.0688	0.503	0.503	0.4347	0.5788	0.5685	0.4872	0.535	0.5144	1.2078	1.1951	1.1951	1.1951	0.4119	1.4501	0.5147	0.4119	0.4935	0.4935	0.6625	0.5509	0.5541	0.4409	1.2174
M02103[c][m]	-0.1492	0.3533	0.3169	0.3169	0.3169	0.3317	0.3313	0.3416	0.3317	0.3173	0.3173	0.4849	0.2906	0.4501	0.3169	0.9052	0.2944	0.3486	1.5384	0.548	0.548	0.548	0.5014	0.4809	0.5105	0.0688	0.503	0.503	0.4347	0.5788	0.5685	0.4872	0.535	0.5144	1.2078	1.1951	1.1951	1.1951	0.4119	1.4501	0.5147	0.4119	0.4935	0.4935	0.6625	0.5509	0.5541	0.4409	1.2174
M02107[c][m]	-0.1492	0.3533	0.3169	0.3169	0.3169	0.3313	0.3313	0.3416	0.3317	0.3173	0.3173	0.4849	0.2906	0.4501	0.3169	0.9052	0.2944	0.3486	1.5384	0.548	0.548	0.548	0.5014	0.4809	0.5105	0.0688	0.503	0.503	0.4347	0.5788	0.5685	0.4872	0.535	0.5144	1.2078	1.1949	1.1949	1.1949	0.4119	1.4501	0.5147	0.4119	0.4935	0.4935	0.6625	0.5509	0.5541	0.4409	1.2174
M02108[c][e]	-0.1492	0.3533	0.3169	0.3169	0.3169	0.3313	0.3313	0.3416	0.3317	0.3173	0.3173	0.4849	0.2906	0.4501	0.3169	0.9052	0.2944	0.3486	1.5384	0.548	0.548	0.548	0.5014	0.4809	0.5105	0.0688	0.503	0.503	0.4347	0.5788	0.5685	0.4872	0.535	0.5144	1.2078	1.1949	1.1949	1.1949	0.4119	1.4501	0.5147	0.4119	0.4935	0.4935	0.6625	0.5509	0.5541	0.4409	1.2174
M02155[c][e][r]	-0.1492	0.3533	0.3169	0.3169	0.3169	0.3313	0.3313	0.3416	0.3317	0.3173	0.3173	0.4849	0.2906	0.4501	0.3169	0.9052	0.2944	0.3486	1.5384	0.548	0.548	0.548	0.5014	0.4809	0.5103	0.0683	0.503	0.503	0.4347	0.5788	0.5685	0.4872	0.535	0.5144	1.2078	1.1949	1.1949	1.1949	0.4119	1.4501	0.5147	0.4119	0.4935	0.4935	0.6625	0.5509	0.5541	0.4409	1.2173
M02611[c][m]	-0.1492	0.3533	0.3169	0.3169	0.3169	0.3317	0.3313	0.3416	0.3317	0.3173	0.3173	0.4849	0.2906	0.4501	0.3169	0.9052	0.2944	0.3486	1.5384	0.548	0.548	0.548	0.5014	0.4809	0.5105	0.0688	0.503	0.503	0.4347	0.5788	0.5685	0.4872	0.535	0.5144	1.2078	1.1949	1.1949	1.1949	0.4119	1.4501	0.5147	0.4119	0.4935	0.4935	0.6625	0.5509	0.5541	0.4409	1.2174
M02612[c][m][r]	-0.1492	0.3533	0.3169	0.3169	0.3169	0.3317	0.3313	0.3416	0.3317	0.3173	0.3173	0.4849	0.2906	0.4501	0.3169	0.9052	0.2944	0.3486	1.5384	0.548	0.548	0.548	0.5014	0.4809	0.5105	0.0688	0.503	0.503	0.4347	0.5788	0.5685	0.4872	0.535	0.5144	1.2078	1.1949	1.1949	1.1949	0.4119	1.4501	0.5147	0.4119	0.4935	0.4935	0.6625	0.5509	0.5541	0.4409	1.2174
M02616[c][m]	-0.1492	0.3533	0.3169	0.3169	0.3169	0.3313	0.3313	0.3416	0.3317	0.3173	0.3173	0.4849	0.2906	0.4501	0.3169	0.9052	0.2944	0.3486	1.5384	0.548	0.548	0.548	0.5014	0.4809	0.5105	0.0688	0.503	0.503	0.4347	0.5788	0.5685	0.4872	0.535	0.5144	1.2078	1.1949	1.1949	1.1949	0.4119	1.4501	0.5147	0.4119	0.4935	0.4935	0.6625	0.5509	0.5541	0.4409	1.2174
M02637[c][m][r]	0.1718	0.3523	0.3157	0.3157	0.3157	0.3305	0.3302	0.3407	0.3305	0.3161	0.3161	0.4836	0.2896	0.4489	0.3157	0.9039	0.2934	0.3475	1.5673	0.6176	0.6176	0.6176	0.5722	0.5553	0.5811	0.0667	0.5739	0.5739	0.5308	0.6476	0.6377	0.5955	0.6049	0.5849	1.251	1.248	1.248	1.248	0.4817	1.4992	0.5818	0.4817	0.561	0.561	0.7259	0.617	0.6201	0.5098	1.27
M02638[c][m]	-0.1492	0.3529	0.3169	0.3169	0.3169	0.3313	0.3313	0.3416	0.3317	0.3173	0.3173	0.4849	0.2906	0.4501	0.3169	0.9052	0.2944	0.3486	1.5384	0.548	0.548	0.548	0.501	0.4809	0.5102	0.0683	0.503	0.503	0.4347	0.5788	0.5685	0.4872	0.5347	0.5144	1.2078	1.1949	1.1949	1.1949	0.4119	1.4499	0.5147	0.4119	0.4935	0.4935	0.6625	0.5509	0.5537	0.4409	1.2172
M02686[c]	1.0574	0.875	0.872	0.872	0.872	0.872	0.872	0.872	0.872	0.872	0.872	0.872	0.872	0.872	0.872	0.872	0.872	0.872	-37.195	-37.195	-37.195	-37.195	-37.195	-37.195	-37.195	2.225	-37.195	-37.195	-37.195	-37.195	-37.195	-37.195	-37.195	-37.195	-37.195	-37.195	-37.195	-37.195	-37.195	-37.195	-37.195	-37.195	-37.195	-37.195	-37.195	-37.195	-37.195	-37.195	-37.195
M02694[c][m]	-0.1492	0.3533	0.3169	0.3169	0.3169	0.3313	0.3313	0.3416	0.3317	0.3173	0.3173	0.4849	0.2906	0.4501	0.3169	0.9052	0.2944	0.3486	1.5384	0.548	0.548	0.548	0.5014	0.4809	0.5105	0.0688	0.503	0.503	0.4347	0.5788	0.5685	0.4872	0.535	0.5144	1.2078	1.1949	1.1949	1.1949	0.4119	1.4501	0.5147	0.4119	0.4935	0.4935	0.6625	0.5509	0.5541	0.4409	1.2174
M02758[c]	1.0574	0.875	0.872	0.872	0.872	0.872	0.872	0.872	0.872	0.872	0.872	0.872	0.872	0.872	0.872	0.872	0.872	0.872	-37.195	-37.195	-37.195	-37.195	-37.195	-37.195	-37.195	2.225	-37.195	-37.195	-37.195	-37.195	-37.195	-37.195	-37.195	-37.195	-37.195	-37.195	-37.195	-37.195	-37.195	-37.195	-37.195	-37.195	-37.195	-37.195	-37.195	-37.195	-37.195	-37.195	-37.195
M02973[c][m]	0.0232	0.3533	0.3169	0.3169	0.3169	0.3314	0.3314	0.3419	0.3318	0.3173	0.3173	0.4848	0.2906	0.4502	0.3169	0.9052	0.2945	0.3488	1.5425	0.5659	0.5659	0.5659	0.5199	0.5019	0.5289	0.0689	0.5215	0.5215	0.4677	0.5964	0.5863	0.5275	0.553	0.5329	1.215	1.2054	1.2054	1.2054	0.4301	1.459	0.5313	0.4301	0.5104	0.5104	0.6773	0.567	0.5701	0.4585	1.2275
M02976[c][m]	-0.1492	0.3533	0.3169	0.3169	0.3169	0.3317	0.3313	0.3416	0.3317	0.3173	0.3173	0.4849	0.2906	0.4501	0.3169	0.9052	0.2944	0.3486	1.5384	0.548	0.548	0.548	0.501	0.4809	0.5102	0.0683	0.503	0.503	0.4347	0.5788	0.5685	0.4872	0.535	0.5144	1.2078	1.1949	1.1949	1.1949	0.4119	1.4501	0.5147	0.4119	0.4935	0.4935	0.6625	0.5509	0.5541	0.4409	1.2174
M03047[c][r][x]	-0.1492	0.3529	0.3165	0.3165	0.3165	0.3313	0.3313	0.3416	0.3313	0.3169	0.3169	0.4846	0.2906	0.4501	0.3169	0.905	0.2944	0.3486	1.5384	0.5474	0.5474	0.5474	0.5007	0.4806	0.5098	0.0683	0.5027	0.5027	0.4347	0.5785	0.5682	0.4869	0.5344	0.5137	1.2076	1.1947	1.1947	1.1947	0.4116	1.4499	0.5144	0.4116	0.4931	0.4931	0.6622	0.5506	0.5537	0.4405	1.2172
M03116[c][m]	-0.1492	0.3533	0.3169	0.3169	0.3169	0.3317	0.3313	0.3416	0.3317	0.3173	0.3173	0.4849	0.2906	0.4501	0.3169	0.9052	0.2944	0.3486	1.5384	0.548	0.548	0.548	0.5014	0.4809	0.5105	0.0688	0.503	0.503	0.4347	0.5788	0.5685	0.4872	0.535	0.5144	1.2078	1.1949	1.1949	1.1949	0.4119	1.4501	0.5147	0.4119	0.4935	0.4935	0.6625	0.5509	0.5541	0.4409	1.2174
M03117[c][e]	-0.1492	0.3533	0.3169	0.3169	0.3169	0.3317	0.3313	0.3416	0.3317	0.3173	0.3173	0.4849	0.2906	0.4501	0.3169	0.9052	0.2944	0.3486	1.5384	0.548	0.548	0.548	0.5014	0.4809	0.5105	0.0688	0.503	0.503	0.4347	0.5788	0.5685	0.4872	0.535	0.5144	1.2078	1.1949	1.1949	1.1949	0.4119	1.4501	0.5147	0.4119	0.4935	0.4935	0.6625	0.5509	0.5541	0.4409	1.2174
M03134[c][e]	-0.1492	0.3533	0.3169	0.3169	0.3169	0.3313	0.3313	0.3416	0.3317	0.3173	0.3173	0.4849	0.2906	0.4501	0.3169	0.9052	0.2944	0.3486	1.5384	0.548	0.548	0.548	0.5014	0.4809	0.5105	0.0688	0.503	0.503	0.4347	0.5788	0.5685	0.4872	0.535	0.5144	1.2078	1.1949	1.1949	1.1949	0.4119	1.4501	0.5147	0.4119	0.4935	0.4935	0.6625	0.5509	0.5541	0.4409	1.2174
M03167[c]	-0.1492	0.3533	0.3169	0.3169	0.3169	0.3313	0.3313	0.3416	0.3317	0.3173	0.3173	0.4849	0.2906	0.4501	0.3169	0.9052	0.2944	0.3486	1.5384	0.548	0.548	0.548	0.5014	0.4809	0.5102	0.0683	0.503	0.503	0.4347	0.5788	0.5685	0.4872	0.535	0.5144	1.2078	1.1949	1.1949	1.1949	0.4119	1.4501	0.5147	0.4119	0.4935	0.4935	0.6625	0.5509	0.5541	0.4409	1.2172
M03168[m]	-0.1478	0.355	0.3187	0.3187	0.3187	0.3331	0.3331	0.3434	0.3335	0.3191	0.3191	0.4863	0.2924	0.4518	0.3187	0.9069	0.2962	0.3503	1.5401	0.5498	0.5498	0.5498	0.5031	0.4823	0.5122	0.0701	0.5047	0.5047	0.4364	0.5805	0.5702	0.4889	0.5367	0.5161	1.2098	1.1969	1.1969	1.1969	0.414	1.4521	0.5168	0.414	0.4955	0.4955	0.6645	0.5529	0.5558	0.4429	1.2194
mag_hs[c][e]	1.0298	0.8572	0.8565	0.8565	0.8565	0.8565	0.8565	0.8565	0.8565	0.8565	0.8565	0.8565	0.8565	0.8565	0.8565	0.8566	0.8565	0.8565	-1.7191	-13.3316	-13.3316	-13.3316	-13.3777	-13.4126	-13.3681	1.7714	-13.3761	-13.3761	-5.4047	-13.3014	-13.3106	-2.5083	-13.3441	-13.3645	-12.6799	-12.6927	-12.6927	-12.6927	-13.4759	-12.438	-13.3733	-13.4759	-13.3942	-13.3942	-13.2255	-13.3422	-13.3387	-13.4471	-12.6705
mal_L[c][e][m][x]	-0.0395	-0.103	-0.1027	-0.1027	-0.1027	-0.1027	-0.1027	-0.1027	-0.1027	-0.1027	-0.1027	-0.1027	-0.1027	-0.1027	-0.1027	-0.1027	-0.1027	-0.1027	1.1942	0.6543	0.6543	0.6543	0.6543	0.6944	0.6543	-0.6736	0.6543	0.6543	0.9531	0.6543	0.6543	1.1223	0.6543	0.6543	0.6061	0.6061	0.6061	0.6061	0.6061	0.6061	0.6061	0.6061	0.6061	0.6061	0.6061	0.6061	0.6061	0.6061	0.6061
malcoa[c][m][x]	4.8576	0.3542	0.3178	0.3178	0.3178	0.3322	0.3322	0.3425	0.3326	0.3182	0.3182	0.4856	0.2915	0.4509	0.3178	0.906	0.2953	0.3494	1.5392	0.5487	0.5487	0.5487	0.5021	0.4816	0.5112	0.0692	0.5038	0.5038	0.4356	0.5796	0.5694	0.4881	0.5357	0.5152	1.2088	1.1959	1.1959	1.1959	0.413	1.4511	0.5157	0.413	0.4945	0.4945	0.6635	0.5519	0.5549	0.4419	1.2183
malt[c][e][l]	-26.8923	0.3533	0.3169	0.3169	0.3169	0.3313	0.3313	0.3416	0.3317	0.3173	0.3173	0.4849	0.2906	0.4501	0.3169	0.9052	0.2944	0.3486	1.5384	0.548	0.548	0.548	0.5014	0.4809	0.5105	0.0683	0.503	0.503	0.4347	0.5788	0.5685	0.4872	0.535	0.5144	1.2078	1.1949	1.1949	1.1949	0.4119	1.4501	0.5147	0.4119	0.4935	0.4935	0.6625	0.5509	0.5541	0.4409	1.2174
malttr[c][e][l]	-1.7342	0.3533	0.3169	0.3169	0.3169	0.3313	0.3313	0.3416	0.3317	0.3173	0.3173	0.4849	0.2906	0.4501	0.3169	0.9052	0.2944	0.3486	1.5384	0.548	0.548	0.548	0.5014	0.4809	0.5104	0.0686	0.503	0.503	0.4347	0.5788	0.5685	0.4872	0.535	0.5144	1.2078	1.1949	1.1949	1.1949	0.4119	1.4501	0.5147	0.4119	0.4935	0.4935	0.6625	0.5509	0.5541	0.4409	1.2174
maltttr[c][e]	-0.1492	0.3533	0.3169	0.3169	0.3169	0.3313	0.3313	0.3416	0.3317	0.3173	0.3173	0.4849	0.2906	0.4501	0.3169	0.9052	0.2944	0.3486	1.5384	0.548	0.548	0.548	0.5014	0.4809	0.5102	0.0683	0.503	0.503	0.4347	0.5788	0.5685	0.4872	0.535	0.5144	1.2078	1.1949	1.1949	1.1949	0.4119	1.4501	0.5147	0.4119	0.4935	0.4935	0.6625	0.5509	0.5541	0.4409	1.2174
man[c][e][l]	-0.1492	0.3529	0.3169	0.3169	0.3169	0.3313	0.3313	0.3416	0.3317	0.3173	0.3173	0.4846	0.2906	0.4497	0.3169	0.9052	0.2944	0.3482	1.5384	0.5477	0.5477	0.5477	0.501	0.4809	0.5102	0.0688	0.503	0.503	0.4347	0.5788	0.5685	0.4872	0.5347	0.5141	1.2076	1.1949	1.1949	1.1949	0.4119	1.4499	0.5144	0.4119	0.4931	0.4931	0.6622	0.5509	0.5537	0.4405	1.2172
man1p[c]	-0.1493	0.3526	0.3163	0.3163	0.3163	0.3311	0.3311	0.3414	0.3314	0.317	0.317	0.4844	0.2903	0.4502	0.3166	0.9052	0.2941	0.349	1.5379	0.5476	0.5476	0.5476	0.5008	0.4807	0.5097	0.0692	0.5025	0.5025	0.4341	0.5783	0.568	0.486	0.5345	0.5139	1.2067	1.194	1.194	1.194	0.411	1.4492	0.5136	0.411	0.4926	0.4926	0.6636	0.5514	0.5542	0.44	1.2167
man6p[c]	-0.1488	0.3526	0.3162	0.3162	0.3162	0.331	0.331	0.3413	0.3312	0.3168	0.3168	0.4844	0.2903	0.4504	0.3164	0.9053	0.2941	0.3486	1.5384	0.5479	0.5479	0.5479	0.5012	0.4811	0.5102	0.0701	0.5028	0.5028	0.4347	0.5788	0.5686	0.4866	0.5349	0.5142	1.2068	1.1941	1.1941	1.1941	0.4111	1.4493	0.5138	0.4111	0.4928	0.4928	0.6643	0.5516	0.5544	0.4401	1.2169
meoh[c][e]	12.227	11.6787	11.6834	11.6834	11.6834	11.6834	11.6834	11.6834	11.6834	11.6834	11.6834	11.6835	11.6834	11.6835	11.6834	11.6836	11.6834	11.6834	1.5384	0.5479	0.5479	0.5479	0.5012	0.4808	0.5104	13.1597	0.5029	0.5029	0.4347	0.5787	0.5684	0.4871	0.5349	0.5143	1.2078	1.1949	1.1949	1.1949	0.4118	1.45	0.5146	0.4118	0.4934	0.4934	0.6621	0.5508	0.554	0.4408	1.2173
mercplac[c]	-13.5716	-13.0703	-13.1066	-13.1066	-13.1066	-13.0926	-13.0926	-13.0827	-13.0922	-13.1063	-13.1063	-12.9387	-13.1329	-12.9729	-13.1066	-12.5182	-13.1291	-13.0746	2.1319	2.1305	2.1305	2.1305	2.1305	2.1319	2.1305	-13.3574	2.1305	2.1305	2.1319	2.1305	2.1305	2.1319	2.1305	2.1305	2.0142	2.0142	2.0142	2.0142	2.0142	2.0142	2.0142	2.0142	2.0142	2.0142	2.0142	2.0142	2.0142	2.0142	2.0142
mercplaccys[c][e]	-39.3162	-39.3162	-39.3162	-39.3162	-39.3162	-39.3162	-39.3162	-39.3162	-39.3162	-39.3162	-39.3162	-39.3162	-39.3162	-39.3162	-39.3162	-39.3162	-39.3162	-39.3162	2.1319	2.1305	2.1305	2.1305	2.1305	2.1319	2.1305	-39.3162	2.1305	2.1305	2.1319	2.1305	2.1305	2.1319	2.1305	2.1305	2.0142	2.0142	2.0142	2.0142	2.0142	2.0142	2.0142	2.0142	2.0142	2.0142	2.0142	2.0142	2.0142	2.0142	2.0142
mercppyr[c]	0.1158	1.9312	1.9319	1.9319	1.9319	1.9319	1.9319	1.9319	1.9319	1.9319	1.9319	1.9319	1.9319	1.9319	1.9319	1.9319	1.9319	1.9319	2.1319	2.1333	2.1333	2.1333	2.1333	2.1319	2.1333	1.3268	2.1333	2.1333	2.1319	2.1333	2.1333	2.1319	2.1333	2.1333	2.2407	2.2407	2.2407	2.2407	2.2407	2.2407	2.2407	2.2407	2.2407	2.2407	2.2407	2.2407	2.2407	2.2407	2.2407
mescoa[m]	-15.9619	-1.3156	-1.3162	-1.3162	-1.3162	-1.3162	-1.3162	-1.3162	-1.3162	-1.3162	-1.3162	-1.3162	-1.3162	-1.3162	-1.3162	-1.3162	-1.3162	-1.3162	0.6225	0.2487	0.2487	0.2487	0.2487	0.2653	0.2487	-2.0513	0.2487	0.2487	0.4595	0.2487	0.2487	0.5851	0.2487	0.2487	0.0968	0.0968	0.0968	0.0968	0.0968	0.0968	0.0968	0.0968	0.0968	0.0968	0.0968	0.0968	0.0968	0.0968	0.0968
mescon[m]	-15.9619	-1.3156	-1.3162	-1.3162	-1.3162	-1.3162	-1.3162	-1.3162	-1.3162	-1.3162	-1.3162	-1.3162	-1.3162	-1.3162	-1.3162	-1.3162	-1.3162	-1.3162	0.6225	0.2487	0.2487	0.2487	0.2487	0.2653	0.2487	-2.0513	0.2487	0.2487	0.4595	0.2487	0.2487	0.5851	0.2487	0.2487	0.0968	0.0968	0.0968	0.0968	0.0968	0.0968	0.0968	0.0968	0.0968	0.0968	0.0968	0.0968	0.0968	0.0968	0.0968
met_L[c][e]	0.5354	0.1531	0.1535	0.1535	0.1535	0.1535	0.1535	0.1535	0.1535	0.1535	0.1535	0.1535	0.1535	0.1535	0.1535	0.1537	0.1535	0.1535	0.7961	0.3874	0.3874	0.3874	0.3874	0.4284	0.3874	0.1336	0.3874	0.3874	0.6166	0.3874	0.3874	0.7425	0.3874	0.3874	0.3584	0.3585	0.3585	0.3585	0.3581	0.3586	0.3581	0.3581	0.3581	0.3581	0.3582	0.3582	0.3582	0.3581	0.3585
metargleu[c][e]	-0.1492	0.3533	0.3169	0.3169	0.3169	0.3317	0.3313	0.3416	0.3317	0.3173	0.3173	0.4849	0.2906	0.4501	0.3169	0.9052	0.2944	0.3486	1.5385	0.548	0.548	0.548	0.5014	0.4809	0.5105	0.0683	0.503	0.503	0.4347	0.5788	0.5685	0.4872	0.535	0.5144	1.2078	1.1949	1.1949	1.1949	0.4119	1.4501	0.5147	0.4119	0.4935	0.4935	0.6625	0.5509	0.5541	0.4409	1.2172
metasntyr[c][e]	-0.1492	0.3529	0.3165	0.3165	0.3165	0.3313	0.3313	0.3416	0.3313	0.3169	0.3169	0.4846	0.2906	0.4501	0.3169	0.905	0.2944	0.3486	1.5385	0.548	0.548	0.548	0.5014	0.4809	0.5105	0.0683	0.503	0.503	0.4347	0.5788	0.5685	0.4872	0.535	0.5144	1.2078	1.1949	1.1949	1.1949	0.4119	1.4501	0.5147	0.4119	0.4935	0.4935	0.6625	0.5509	0.5541	0.4409	1.2174
metglntyr[c][e]	-0.1492	0.3533	0.3169	0.3169	0.3169	0.3317	0.3313	0.3416	0.3317	0.3173	0.3173	0.4849	0.2906	0.4501	0.3169	0.9052	0.2944	0.3486	1.5384	0.548	0.548	0.548	0.5014	0.4809	0.5105	0.0688	0.503	0.503	0.4347	0.5788	0.5685	0.4872	0.535	0.5144	1.2078	1.1949	1.1949	1.1949	0.4119	1.4501	0.5147	0.4119	0.4935	0.4935	0.6625	0.5509	0.5541	0.4409	1.2174
metglyarg[c][e]	-0.1488	0.3534	0.3174	0.3174	0.3174	0.3318	0.3318	0.3421	0.3322	0.3178	0.3178	0.485	0.2911	0.4505	0.3174	0.9057	0.2949	0.349	1.5388	0.5482	0.5482	0.5482	0.5015	0.4814	0.5106	0.0688	0.5035	0.5035	0.4352	0.5789	0.569	0.4877	0.5351	0.5145	1.2081	1.1952	1.1952	1.1952	0.412	1.4502	0.5149	0.412	0.4936	0.4936	0.6627	0.551	0.5542	0.441	1.2175
methf[c][m]	-1.0421	-1.4541	-1.4531	-1.4531	-1.4531	-1.4531	-1.4531	-1.4531	-1.4531	-1.4531	-1.4531	-1.4531	-1.4531	-1.4531	-1.4531	-1.4531	-1.4531	-1.4531	0.7114	-1.8132	-1.8132	-1.8132	-1.8132	-1.723	-1.8132	-1.3139	-1.8132	-1.8132	-0.3501	-1.8132	-1.8132	0.4063	-1.8132	-1.8132	-1.9589	-1.9588	-1.9588	-1.9588	-1.9589	-1.9588	-1.9589	-1.9589	-1.9589	-1.9589	-1.9588	-1.9588	-1.9588	-1.9589	-1.9588
methislys[c][e]	-0.1482	0.353	0.3166	0.3166	0.3166	0.3314	0.3314	0.3417	0.3314	0.317	0.317	0.4847	0.2907	0.4498	0.3166	0.9049	0.2945	0.3487	1.5388	0.5482	0.5482	0.5482	0.5012	0.4811	0.5103	0.0683	0.5031	0.5031	0.4352	0.5789	0.5687	0.4877	0.5351	0.5145	1.2081	1.1952	1.1952	1.1952	0.412	1.4502	0.5149	0.412	0.4936	0.4936	0.6627	0.551	0.5539	0.441	1.2175
metmetile[c][e]	0.2681	0.5925	0.5948	0.5948	0.5948	0.5948	0.5948	0.5948	0.5948	0.5948	0.5948	0.5948	0.5948	0.5948	0.5948	0.5948	0.5948	0.5948	1.1026	0.6752	0.6752	0.6752	0.6752	0.746	0.6752	0.3973	0.6752	0.6752	1.1026	0.6752	0.6752	1.1026	0.6752	0.6752	0.7153	0.7155	0.7155	0.7155	0.7155	0.7155	0.7155	0.7155	0.7155	0.7155	0.7155	0.7155	0.7155	0.7155	0.7155
metphearg[c][e]	-0.1492	0.3533	0.3169	0.3169	0.3169	0.3313	0.3313	0.3416	0.3317	0.3173	0.3173	0.4849	0.2906	0.4501	0.3169	0.9052	0.2944	0.3486	1.5384	0.548	0.548	0.548	0.501	0.4809	0.5102	0.0683	0.503	0.503	0.4347	0.5788	0.5685	0.4872	0.535	0.5144	1.2078	1.1949	1.1949	1.1949	0.4119	1.4499	0.5144	0.4119	0.4931	0.4931	0.6622	0.5506	0.5537	0.4405	1.2172
mettrpphe[c][e]	0.7812	1.4994	1.4998	1.4998	1.4998	1.4998	1.4998	1.4998	1.4998	1.4998	1.4998	1.4998	1.4998	1.4998	1.4998	1.4998	1.4998	1.4998	-8.0426	-9.0333	-9.0333	-9.0333	-9.0803	-9.1007	-9.0712	1.5926	-9.0783	-9.0783	-9.1466	-9.0025	-9.0128	-9.0938	-9.0463	-9.0669	-8.3736	-8.3865	-8.3865	-8.3865	-9.1694	-8.1315	-9.0669	-9.1694	-9.0879	-9.0879	-8.9188	-9.0307	-9.0276	-9.1405	-8.3642
mev_R[c][e][x]	0.8313	-9.1521	0.9194	0.9194	0.9194	0.9194	0.9194	0.9194	0.9194	0.9194	0.9194	0.9195	0.9194	0.9194	0.9194	0.9197	0.9194	0.9194	-7.967	-0.7588	-0.7588	-0.7588	-0.7589	-0.3943	-0.7589	0.2781	-0.7589	-0.7589	0.9462	-0.7587	-0.7588	1.5187	-0.7588	-0.7589	-8.2975	-0.7638	-0.7638	-0.7638	-0.7655	-0.7631	-0.7653	-0.7655	-0.7653	-0.7653	-0.765	-0.7652	-0.7652	-0.7654	-0.7638
mhista[c][e]	-0.1492	0.3533	0.3169	0.3169	0.3169	0.3317	0.3313	0.3416	0.3317	0.3173	0.3173	0.4849	0.2906	0.4501	0.3169	0.9052	0.2944	0.3486	1.5384	0.548	0.548	0.548	0.5014	0.4809	0.5105	0.0688	0.503	0.503	0.4347	0.5788	0.5685	0.4872	0.535	0.5144	1.2078	1.1949	1.1949	1.1949	0.4119	1.4501	0.5147	0.4119	0.4935	0.4935	0.6625	0.5509	0.5541	0.4409	1.2174
mi145p[c]	2.2962	-0.0136	-0.0228	-0.0228	-0.0228	-0.0228	-0.0228	-0.0228	-0.0228	-0.0228	-0.0228	-0.0228	-0.0228	-0.0228	-0.0228	-0.0228	-0.0228	-0.0228	-32.1974	-32.1974	-32.1974	-32.1974	-32.1974	-32.1974	-32.1974	3.3544	-32.1974	-32.1974	-32.1974	-32.1974	-32.1974	-32.1974	-32.1974	-32.1974	-32.1974	-32.1974	-32.1974	-32.1974	-32.1974	-32.1974	-32.1974	-32.1974	-32.1974	-32.1974	-32.1974	-32.1974	-32.1974	-32.1974	-32.1974
mi14p[c]	2.2962	-0.0136	-0.0228	-0.0228	-0.0228	-0.0228	-0.0228	-0.0228	-0.0228	-0.0228	-0.0228	-0.0228	-0.0228	-0.0228	-0.0228	-0.0228	-0.0228	-0.0228	-33.1974	-33.1974	-33.1974	-33.1974	-33.1974	-33.1974	-33.1974	3.3544	-33.1974	-33.1974	-33.1974	-33.1974	-33.1974	-33.1974	-33.1974	-33.1974	-33.1974	-33.1974	-33.1974	-33.1974	-33.1974	-33.1974	-33.1974	-33.1974	-33.1974	-33.1974	-33.1974	-33.1974	-33.1974	-33.1974	-33.1974
mi1p_D[c][e][n]	0.5616	0.6043	0.6042	0.6042	0.6042	0.6042	0.6042	0.6042	0.6042	0.6042	0.6042	0.6042	0.6042	0.6042	0.6042	0.6042	0.6042	0.6042	-11.6431	-12.6333	-12.6333	-12.6333	-12.6801	-12.7006	-12.671	0.8984	-12.6783	-12.6783	-12.7468	-12.6026	-12.6128	-12.6944	-12.6463	-12.6669	-11.9732	-11.9861	-11.9861	-11.9861	-12.7692	-11.7311	-12.6665	-12.7692	-12.6877	-12.6877	-12.5188	-12.6304	-12.6273	-12.7403	-11.9638
mi4p_D[c]	2.2962	-0.0136	-0.0228	-0.0228	-0.0228	-0.0228	-0.0228	-0.0228	-0.0228	-0.0228	-0.0228	-0.0228	-0.0228	-0.0228	-0.0228	-0.0228	-0.0228	-0.0228	-33.1974	-33.1974	-33.1974	-33.1974	-33.1974	-33.1974	-33.1974	3.3544	-33.1974	-33.1974	-33.1974	-33.1974	-33.1974	-33.1974	-33.1974	-33.1974	-33.1974	-33.1974	-33.1974	-33.1974	-33.1974	-33.1974	-33.1974	-33.1974	-33.1974	-33.1974	-33.1974	-33.1974	-33.1974	-33.1974	-33.1974
minohp[c][n]	-0.1492	0.3533	0.3169	0.3169	0.3169	0.3317	0.3313	0.3416	0.3317	0.3173	0.3173	0.4849	0.2906	0.4501	0.3169	0.9052	0.2944	0.3486	1.5384	0.548	0.548	0.548	0.501	0.4809	0.5102	0.0688	0.503	0.503	0.4347	0.5788	0.5685	0.4872	0.535	0.5144	1.208	1.1951	1.1951	1.1951	0.4119	1.4502	0.5147	0.4119	0.4935	0.4935	0.6625	0.5509	0.5541	0.4409	1.2174
mlthf[c][e][m]	0.1891	0.1065	0.1062	0.1062	0.1062	0.1062	0.1062	0.1062	0.1062	0.1062	0.1062	0.1063	0.1062	0.1062	0.1062	0.1063	0.1062	0.1062	1.3731	0.393	0.393	0.393	0.393	0.4767	0.393	0.4514	0.393	0.393	0.7998	0.393	0.393	1.1501	0.393	0.393	0.2933	0.2933	0.2933	0.2933	0.2933	0.2933	0.2933	0.2933	0.2933	0.2933	0.2933	0.2933	0.2933	0.2933	0.2933
mmcoa_R[m]	0.0282	0.0539	0.0539	0.0539	0.0539	0.0539	0.0539	0.0539	0.0539	0.0539	0.0539	0.0539	0.0539	0.0539	0.0539	0.0539	0.0539	0.0539	0.0539	0.0539	0.0539	0.0539	0.0539	0.0539	0.0539	0.0539	0.0539	0.0539	0.0539	0.0539	0.0539	0.0539	0.0539	0.0539	0.0539	0.0539	0.0539	0.0539	0.0539	0.0539	0.0539	0.0539	0.0539	0.0539	0.0539	0.0539	0.0539	0.0539	0.0539
mmcoa_S[m]	0.0282	0.0539	0.0539	0.0539	0.0539	0.0539	0.0539	0.0539	0.0539	0.0539	0.0539	0.0539	0.0539	0.0539	0.0539	0.0539	0.0539	0.0539	0.0539	0.0539	0.0539	0.0539	0.0539	0.0539	0.0539	0.0539	0.0539	0.0539	0.0539	0.0539	0.0539	0.0539	0.0539	0.0539	0.0539	0.0539	0.0539	0.0539	0.0539	0.0539	0.0539	0.0539	0.0539	0.0539	0.0539	0.0539	0.0539	0.0539	0.0539
mthgxl[c]	-0.1384	0.3593	0.3227	0.3227	0.3227	0.3377	0.3373	0.3481	0.3377	0.3232	0.3232	0.4915	0.2969	0.4574	0.3232	0.9116	0.3006	0.3566	1.4956	0.4944	0.4944	0.4944	0.4503	0.4591	0.462	0.08	0.4516	0.4516	0.3584	0.5189	0.5253	0.4595	0.4838	0.4636	1.2205	1.2077	1.2077	1.2077	0.4246	1.4626	0.5269	0.4246	0.5065	0.5065	0.6777	0.5637	0.5664	0.4537	1.2303
mvlac[c][e]	0	0	0	0	0	0	0	0	0	0	0	0	0	0	0	0	0	0	0	0	0	0	0	0	0	0	0	0	0	0	0	0	0	0	0	0	0	0	0	0	0	0	0	0	0	0	0	0	0
N1aspmd[c][e]	-0.1492	0.3533	0.3169	0.3169	0.3169	0.3317	0.3313	0.3416	0.3317	0.3173	0.3173	0.4849	0.2906	0.4501	0.3169	0.9052	0.2944	0.3486	1.5384	0.548	0.548	0.548	0.5014	0.4809	0.5105	0.0688	0.503	0.503	0.4347	0.5788	0.5685	0.4872	0.535	0.5144	1.2078	1.1949	1.1949	1.1949	0.4119	1.4501	0.5147	0.4119	0.4935	0.4935	0.6625	0.5509	0.5541	0.4409	1.2174
n5m2masn[c][e][g]	-0.1492	0.3533	0.3169	0.3169	0.3169	0.3317	0.3313	0.3416	0.3317	0.3173	0.3173	0.4849	0.2906	0.4501	0.3169	0.9052	0.2944	0.3486	1.5384	0.548	0.548	0.548	0.5014	0.4809	0.5105	0.0688	0.503	0.503	0.4347	0.5788	0.5685	0.4872	0.535	0.5144	1.2078	1.1949	1.1949	1.1949	0.4119	1.4501	0.5147	0.4119	0.4935	0.4935	0.6625	0.5509	0.5541	0.4409	1.2174
na1[c][e][g]	0.2441	0.1986	0.1991	0.1991	0.1991	0.1991	0.1991	0.1991	0.1991	0.1991	0.1991	0.1991	0.1991	0.1991	0.1991	0.1991	0.1991	0.1991	1.2435	0.6762	0.6762	0.6762	0.6762	0.7209	0.6762	0.0367	0.6762	0.6762	0.9659	0.6762	0.6762	1.1584	0.6762	0.6762	0.6299	0.6298	0.6298	0.6298	0.6298	0.6299	0.6298	0.6298	0.6298	0.6298	0.6298	0.6298	0.6298	0.6298	0.6299
nac[c][e]	-0.1133	0.3543	0.318	0.318	0.318	0.3326	0.3326	0.3431	0.333	0.3184	0.3184	0.4869	0.2935	0.4672	0.3184	0.9076	0.2962	0.3618	15.8241	0.5515	0.5515	0.5515	0.5064	0.485	0.5151	0.0896	0.5083	0.5083	0.4293	0.5799	0.571	15.0644	0.5399	0.5199	1.2225	1.2107	1.2107	1.2107	0.4283	1.4665	0.531	0.4283	0.5099	0.5099	0.6664	0.5679	0.5716	0.4576	1.2352
nad[c][e][m][n][r][x]	-0.0221	-0.1078	-0.1106	-0.1106	-0.1106	-0.1106	-0.1106	-0.1106	-0.1106	-0.1106	-0.1106	-0.1106	-0.1106	-0.1106	-0.1106	-0.1106	-0.1106	-0.1106	0.8248	0.3327	0.3327	0.3327	0.3327	0.3604	0.3327	0.1365	0.3327	0.3327	0.5884	0.3328	0.3328	0.7455	0.3327	0.3327	-0.0683	-0.0691	-0.0691	-0.0691	-0.0691	-0.069	-0.0691	-0.0691	-0.0691	-0.0691	-0.0691	-0.0691	-0.0691	-0.0691	-0.0691
nadh[c][m][r][x]	-0.0221	-0.1078	-0.1106	-0.1106	-0.1106	-0.1106	-0.1106	-0.1106	-0.1106	-0.1106	-0.1106	-0.1106	-0.1106	-0.1106	-0.1106	-0.1106	-0.1106	-0.1106	0.8216	0.3317	0.3317	0.3317	0.3317	0.3592	0.3317	0.1365	0.3317	0.3317	0.5865	0.3317	0.3317	0.7428	0.3317	0.3317	-0.0695	-0.0703	-0.0703	-0.0703	-0.0703	-0.0702	-0.0703	-0.0703	-0.0703	-0.0703	-0.0703	-0.0703	-0.0703	-0.0703	-0.0703
nadp[c][e][m][r][x]	0.2515	0.1477	0.1603	0.1603	0.1603	0.1603	0.1603	0.1603	0.1603	0.1603	0.1603	0.1604	0.1603	0.1604	0.1603	0.1605	0.1603	0.1603	1.7763	0.5734	0.5734	0.5734	0.5734	0.7144	0.5734	0.2406	0.5734	0.5734	1.3227	0.5734	0.5734	1.6533	0.5734	0.5734	0.3293	0.334	0.334	0.334	0.3339	0.3341	0.3339	0.3339	0.3339	0.3339	0.3339	0.3339	0.3339	0.3339	0.3341
nadph[c][m][r][x]	0.2515	0.1477	0.1603	0.1603	0.1603	0.1603	0.1603	0.1603	0.1603	0.1603	0.1603	0.1604	0.1603	0.1604	0.1603	0.1605	0.1603	0.1603	1.7763	0.5734	0.5734	0.5734	0.5734	0.7144	0.5734	0.2406	0.5734	0.5734	1.3227	0.5734	0.5734	1.6533	0.5734	0.5734	0.3293	0.334	0.334	0.334	0.3339	0.3341	0.3339	0.3339	0.3339	0.3339	0.3339	0.3339	0.3339	0.3339	0.3341
ncam[c][e]	-0.1015	0.3587	0.3228	0.3228	0.3228	0.3383	0.3383	0.3484	0.3383	0.3242	0.3242	0.4774	0.2997	0.463	0.3241	0.9116	0.3026	0.3213	1.593	0.5675	0.5675	0.5675	0.5214	0.5251	0.5308	0.1171	0.5234	0.5234	0.4758	0.5989	0.5891	0.5414	0.555	0.5346	1.2008	1.1872	1.1872	1.1872	0.4047	1.4429	0.5078	0.4047	0.4863	0.4863	0.6666	0.5553	0.5602	0.4339	1.2111
nh4[c][e][m][n][r][x]	0.0518	0.0803	0.0804	0.0804	0.0804	0.0804	0.0804	0.0804	0.0804	0.0804	0.0804	0.0804	0.0804	0.0804	0.0804	0.0804	0.0804	0.0804	1.5168	0.8515	0.8515	0.8515	0.8515	0.9137	0.8515	-0.4058	0.8515	0.8515	1.2064	0.8515	0.8515	1.4267	0.8515	0.8515	0.7812	0.7812	0.7812	0.7812	0.7812	0.7812	0.7812	0.7812	0.7812	0.7812	0.7812	0.7812	0.7812	0.7812	0.7812
nicrns[c]	0	0	0	0	0	0	0	0	0	0	0	0	0	0	0	0	0	0	40.7334	0	0	0	0	0	0	0	0	0	0	0	0	39.9737	0	0	0	0	0	0	0	0	0	0	0	0	0	0	0	0	0
nicrnt[c][e][n]	-0.1431	0.3528	0.3166	0.3166	0.3166	0.3312	0.3312	0.3415	0.3314	0.3169	0.3169	0.485	0.2908	0.4507	0.3168	0.9057	0.2944	0.3419	13.2545	0.5453	0.5453	0.5453	0.4993	0.48	0.5085	0.0725	0.501	0.501	0.433	0.5763	0.5664	12.4946	0.5329	0.5125	1.2064	1.1936	1.1936	1.1936	0.4107	1.4489	0.5135	0.4107	0.4923	0.4923	0.6588	0.5512	0.555	0.4397	1.2164
nmn[c][m][n]	-0.1495	0.3512	0.3152	0.3152	0.3152	0.3299	0.3298	0.34	0.33	0.3154	0.3154	0.4831	0.2891	0.4478	0.3153	0.9034	0.2928	0.3448	9.5304	7.5023	7.5023	7.5023	7.5021	7.622	7.5021	0.0663	7.5021	7.5021	8.5509	7.5024	7.5023	9.2504	7.5022	7.5021	7.2558	7.2557	7.2557	7.2557	7.2512	7.2578	7.2517	7.2512	7.2516	7.2516	7.2524	7.2519	7.2519	7.2513	7.2559
[truncated: 361 more rows]
[truncated: 152 more columns]

## Sheet: 工作表1
Table S3: The log2 fold changes of metabolite-flows for the template, identified anticancer target genes, and identified antimetabolites
[truncated: 1,479 more rows]

## Sheet: FactorLoading
percentage	0.6419	0.1932	0.07045	0.02612	0.02259
[truncated: 202 more rows]

[truncated: 1 more sheets: 1st and 2nd groups]
